# Supplementary material for: A double helical 4H assembly pattern with secondary hierarchical complexity in an Ag70 nanocluster crystal
Source: Royal Society of Chemistry journal article supplement (doi:10.1039/d1nh00332a), 2021-01-01
Supplement: d1nh00332a1.pdf [file d1nh00332a1.pdf]

# Supporting Information

## **A Double Helical 4H Assembly Pattern with Secondary Hierarchical Complexity in an Ag<sub>70</sub> Nanocluster Crystal**

Tao Chen,<sup>a</sup> Sha Yang,<sup>c</sup> Qinzhen Li,<sup>a</sup> Yongbo Song,<sup>b</sup> Guang Li,<sup>\* a</sup> Jinsong Chai,<sup>\* b</sup> and Manzhou Zhu<sup>\* b c</sup>

<sup>a</sup> School of Physics and Materials Science, Institute of Physical Science and Information Technology, Anhui Key Laboratory of Information Materials and Devices, Anhui University, Hefei, Anhui, 230601, People's Republic of China.

<sup>b</sup> Department of Chemistry and Centre for Atomic Engineering of Advanced Materials, Anhui Province Key Laboratory of Chemistry for Inorganic/Organic Hybrid Functionalized Materials, Anhui University, Hefei, Anhui, 230601, China.

<sup>c</sup> Department Institutes of Physical Science and Information Technology, Key Laboratory of Structure and Functional Regulation of Hybrid Materials of Ministry of Education, Anhui University, Hefei, Anhui, 230601, China.

## Table of Contents

- Figure S1.** UV-vis spectrum of **Ag<sub>70</sub>-TPP**.
- Figure S2.** ESI-MS spectrum of **Ag<sub>70</sub>-TPP** in positive mode.
- Figure S3.** (a) XPS spectrum of **Ag<sub>70</sub>-TPP**, (b) Ag 3d spectra of **Ag<sub>70</sub>-TPP**, Ag(0) nanoparticle, and Ag(I)-TBBT complex, and (c) peak fitting of Ag 3d spectrum of **Ag<sub>70</sub>-TPP**.
- Figure S4.** <sup>1</sup>H NMR spectrum of **Ag<sub>70</sub>-TPP** nanocluster.
- Figure S5.** <sup>31</sup>P-NMR spectra of **Ag<sub>70</sub>-TPP**, Ag-PPh<sub>3</sub> complex, and PPh<sub>3</sub> dissolved in CD<sub>2</sub>Cl<sub>2</sub>.
- Figure S6.** <sup>2</sup>H NMR spectra of **Ag<sub>70</sub>-TPP**, CH<sub>2</sub>Cl<sub>2</sub>, and CH<sub>2</sub>Cl<sub>2</sub> + CD<sub>2</sub>Cl<sub>2</sub> solvents.
- Figure S7.** The 14th and 17th silver atoms in **Ag<sub>70</sub>-TPP** nanocluster.
- Figure S8.** The connection mode of phosphine ligands in **Ag<sub>70</sub>-TPP** nanoclusters.
- Figure S9.** The bonding length distributions in the **Ag<sub>70</sub>-TPP** nanocluster.
- Figure S10.** μ-2, μ-3, and μ-4 coordinated thiolates of **Ag<sub>70</sub>-TPP** nanoclusters.
- Figure S11.** Achiral Ag<sub>23</sub> core and chiral shell of **Ag<sub>70</sub>-TPP**.
- Figure S12.** Four pairs of enantiomers in the unit cell.
- Figure S13.** Diagram of the relationship between the eight molecules in the unit cell.
- Figure S14.** The three-views of two helical **Ag<sub>70</sub>-TPP**.
- Figure S15.** Two helical axis with opposite directions alternate arrangement.
- Figure S16.** The C-H···π interactions of adjacent cluster.
- Figure S17.** The distorted angle of **Ag<sub>70</sub>-TPP** nanoclusters.
- Figure S18.** UV-vis spectrum of **Ag<sub>70</sub>-TPP**, and **Ag<sub>70</sub>-TPTP**.
- Figure S19.** The TGA test of **Ag<sub>70</sub>-TPTP** nanocluster.
- Figure S20.** The self-assembly of **Ag<sub>70</sub>-TPP** and **Ag<sub>70</sub>-TPTP** clusters.
- Figure S21.** The interactions between ligands of two **Ag<sub>70</sub>-TPTP**.
- Table S1.** Atomically precise nanoclusters with decahedral cores.
- Table S2.** Comparison of helix parameters between alpha-keratin, TMV, and **Ag<sub>70</sub>-TPP**.
- Table S3.** Crystal data and structure refinement for **Ag<sub>70</sub>-TPP**.
- Table S4.** Crystal data and structure refinement for **Ag<sub>70</sub>-TPTP**.
- Table S5.** Bond Lengths for **Ag<sub>70</sub>-TPP**.
- Table S6.** Bond Angles for **Ag<sub>70</sub>-TPP**.
- Table S7.** Bond Lengths for **Ag<sub>70</sub>-TPTP**.
- Table S8.** Bond Angles for **Ag<sub>70</sub>-TPTP**.

## Experimental Procedures

### 1. Chemicals.

All reagents and solvents were commercially purchased and used as received without further purification, including silver trifluoromethanesulfonate ( $\text{AgCF}_3\text{SO}_3$ , 99%), 4-tert-butylbenzenethiol (TBBT,  $\geq 99.99\%$ ), triphenylphosphine (TPP,  $\geq 99.99\%$ ), glutathione (GSH,  $\geq 99.99\%$ ), sodium hexafluoroantimonate ( $\text{NaSbF}_6$ ,  $\geq 99.99\%$ ) sodium borohydride ( $\text{NaBH}_4$ ,  $> 98\%$ ), methanol (HPLC grade,  $\geq 99.9\%$ ), dichloromethane (HPLC grade,  $\geq 99.9\%$ ). All glassware was cleaned with aqua regia ( $\text{HCl}:\text{HNO}_3 = 3:1$  vol%), washed with nanopure water, and then dried in an oven prior to use.

### 2. Synthesis of $\text{Ag}_{70}(\text{TBBT})_{42}(\text{TPP})_5$ nanoclusters.

Synthesis of the  $\text{Ag}_{70}(\text{TBBT})_{42}(\text{TPP})_5$  was performed by a two-step synthetic method.

(i) The synthesis of the precursor  $\text{Ag}_m(\text{SG})_n$ .  $\text{AgCF}_3\text{SO}_3$  (128 mg, 0.5 mmol) was first dissolved in 10 mL of water added into the 50-mL single-neck round-bottom flask. Then, GSH (200 mg, 0.65 mmol),  $\text{NaSbF}_6$  (129 mg, 0.5 mmol) and NaOH (40 mg, 1 mmol) was added into the mixture. After about 20 min, 2 mL of  $\text{NaBH}_4$  aqueous solution (18.0 mg/mL) was added quickly into the solution under vigorous stirring. The color of the solution turned to black, and the reaction was continued for two hours.

(ii) Two-phase ligand exchange. The obtained aqueous solution of  $\text{Ag}_m(\text{SG})_n$  was mixed with 15 mL  $\text{CH}_2\text{Cl}_2$  and 0.4 mL TBBT. Then excess  $\text{PPh}_3$  (262 mg, 1 mmol) was added to the mixed solvent. The solution was reacted for 12 h at room temperature with vigorous stirring. The nanoclusters were found to transfer from the water phase to the organic phase. Then, the water phase was removed. The crude product dissolved in  $\text{CH}_2\text{Cl}_2$  was washed with methanol for three times to remove excess thiolate and other by-products. The  $\text{Ag}_{70}$  NCs were crystallized in  $\text{CH}_2\text{Cl}_2/\text{CH}_3\text{OH}$ , and black crystals were obtained for about one week. The yield of  $\text{Ag}_{70}$  cluster (crystal) is about 30% based on the Ag element.

The synthetic method of the  $\text{Ag}_{70}(\text{TBBT})_{42}(\text{TPTP})_5$  and  $\text{Ag}_{70}(\text{TBBT})_{42}(\text{TMTP})_5$  were same as that of  $\text{Ag}_{70}(\text{TBBT})_{42}(\text{TPP})_5$ , but the TPP ligand replaced by TPTP/TMTP in the synthesis process.

### 3. Characterization.

UV-Vis-NIR absorption spectrum of  $\text{Ag}_{70}$  NCs dissolved in  $\text{CH}_2\text{Cl}_2$  were recorded using an Agilent 8453 diode array spectrometer, whose background correction was made using a  $\text{CH}_2\text{Cl}_2$  blank.

X-ray photoelectron spectroscopy (XPS) measurements were performed on a Thermo ESCALAB 250 configured with a monochromated  $\text{AlK}\alpha$  (1486.8 eV) 150W X-ray source, 0.5 mm circular spot size, a flood gun to counter charging effects, and the analysis chamber base pressure lower than  $1 \times 10^{-9}$  mbar. Data were collected with  $\text{FAT}=20$  eV.

Electrospray ionization mass spectra (ESI-MS) were recorded using a Waters Xevo G2-XS Q ToF mass spectrometer. The source temperature maintained at 80 °C. The sample was directly infused into the chamber at 5  $\mu\text{L}/\text{min}$ . ESI sample was prepared by dissolving it in  $\text{CH}_2\text{Cl}_2/\text{CH}_3\text{OH}$  (0.1 mg/mL). CsOAc was added to enhance the ionization intensity of the  $\text{Ag}_{70}$  NCs.

Nuclear magnetic resonance (NMR) analysis was performed on a Digital FT-NMR Spectrometer (JNM-ECZ600R) operating at 600 MHz for  $^1\text{H}$ ,  $^2\text{H}$  and  $^{31}\text{P}$  NMR.  $\text{CD}_2\text{Cl}_2$  was used as the solvent to dissolve ~10 mg clusters for  $^1\text{H}$  and  $^{31}\text{P}$  NMR, and  $\text{CH}_2\text{Cl}_2$  was used as the solvent to dissolve ~10 mg clusters for  $^2\text{H}$  NMR.

#### **4. X-ray crystallographic determination of $\text{Ag}_{70}\text{-TPP}$ and $\text{Ag}_{70}\text{-TPTP}$ .**

**$\text{Ag}_{70}\text{-TPP}$ :** The data collection for single crystal X-ray diffraction was carried out on a Bruker Smart APEX II CCD diffractometer at 170 K, using graphite-monochromatized Ga  $K\alpha$  radiation ( $\lambda = 1.34139 \text{ \AA}$ ). Data reductions and absorption corrections were performed using the SAINT and SADABS programs, respectively. The structure was solved by direct methods and refined with full-matrix least squares on  $F^2$  using the SHELXTL software package. All non-hydrogen atoms were refined anisotropically, and all hydrogen atoms were set in geometrically calculated positions and refined isotropically using a riding model. The data were corrected for delocalized electron density using the SQUEEZE procedure as implemented in PLATON. SQUEEZE was used to mask some solvent molecules ( $\text{CH}_2\text{Cl}_2$  and  $\text{CH}_3\text{OH}$ ) that could not be modelled.

**$\text{Ag}_{70}\text{-TPTP}$ :** Single crystal X-ray diffraction (SCXRD) was carried out on a Stoe Stadivari diffractometer under liquid nitrogen flow at 120 K using graphite-monochromatized Cu  $K\alpha$  radiation ( $\lambda = 1.54186 \text{ \AA}$ ).

## Figures and Tables

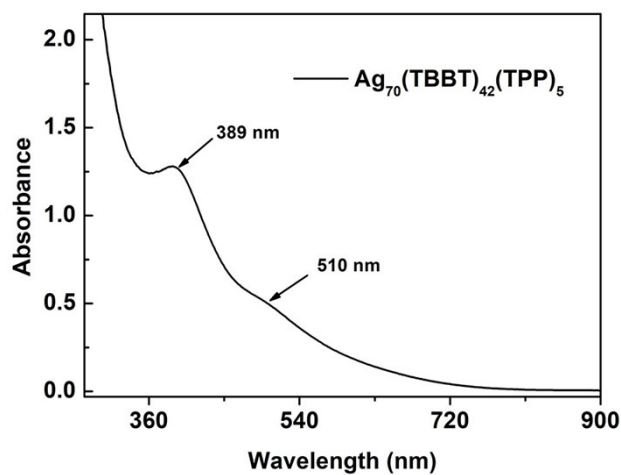

**Figure S1.** UV-vis spectrum of  $\text{Ag}_{70}$ -TPP. ( $\text{Ag}_{70}$ -TPP crystals dissolved in  $\text{CH}_2\text{Cl}_2$  solvent with a concentration of  $\sim 6 \mu\text{mol/L}$ .)

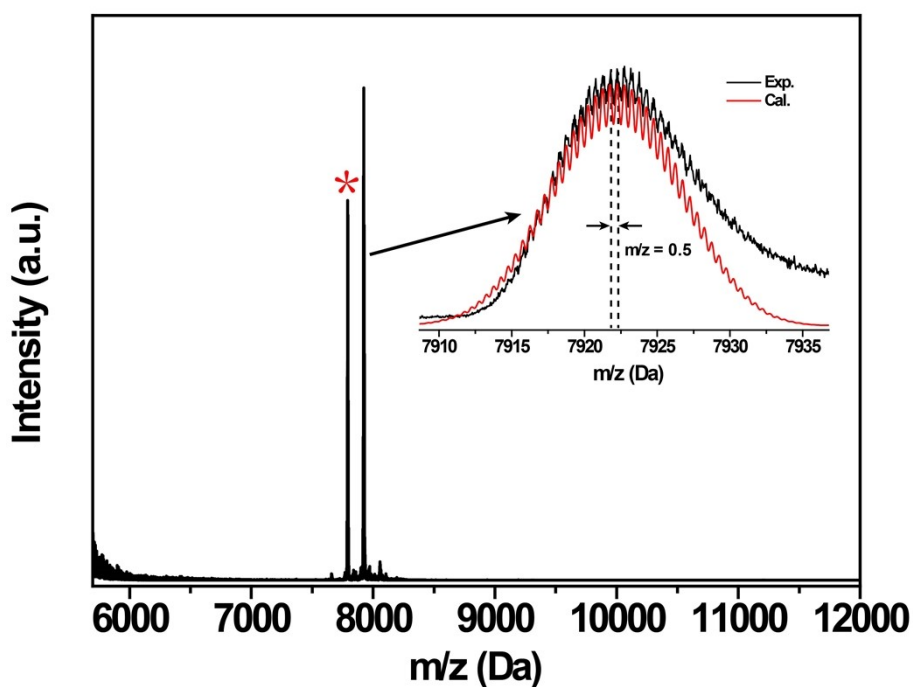

**Figure S2.** (a) ESI-MS spectrum of  $\text{Ag}_{70}$ -TPP in positive mode. (Inset: experimental data (black) and the simulated spectra (red), and \* indicates the loss of one  $-\text{PPh}_3$  ligand, that is  $\text{Ag}_{70}(\text{TBBT})_{42}(\text{TPP})_4$ .)

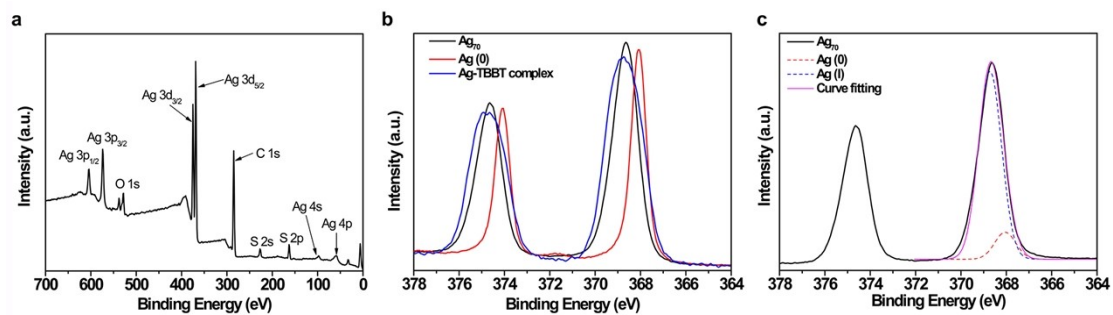

**Figure S3.** (a) XPS spectrum of  $\text{Ag}_{70}\text{-TPP}$ , (b) Ag 3d spectra of  $\text{Ag}_{70}\text{-TPP}$ , Ag(0) nanoparticle, and Ag(I)-TBBT complex, and (c) peak fitting of Ag 3d spectrum of  $\text{Ag}_{70}\text{-TPP}$ .

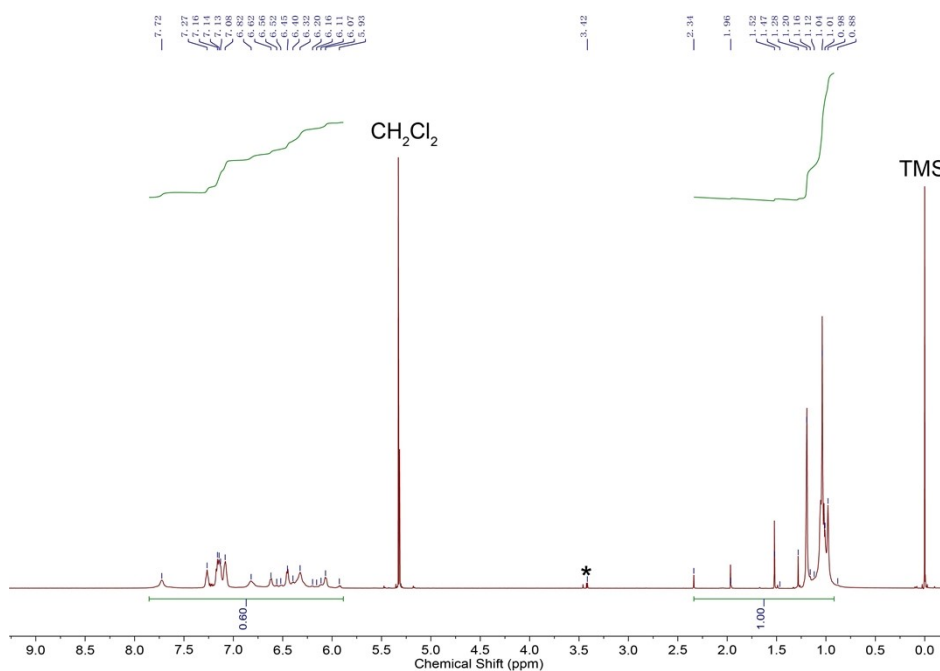

**Figure S4.**  $^1\text{H-NMR}$  spectrum of  $\text{Ag}_{70}\text{-TPP}$  nanocluster. (\* belongs to methyl peak of residual  $\text{CH}_3\text{OH}$  solvent.)

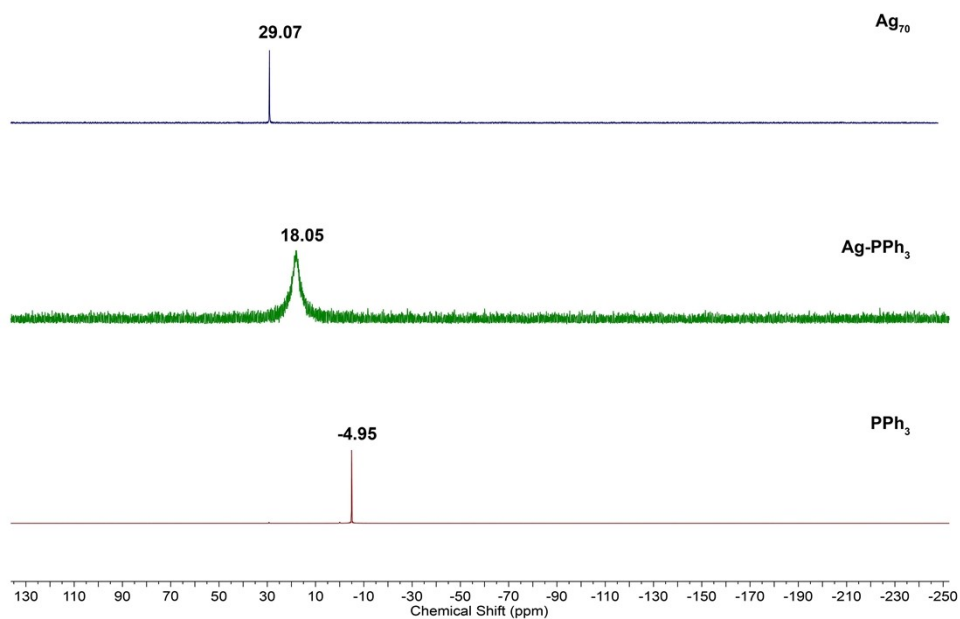

**Figure S5.**  $^{31}\text{P}$ -NMR spectra of  $\text{Ag}_{70}$ -TPP,  $\text{Ag-PPh}_3$  complex, and  $\text{PPh}_3$  dissolved in  $\text{CD}_2\text{Cl}_2$ .

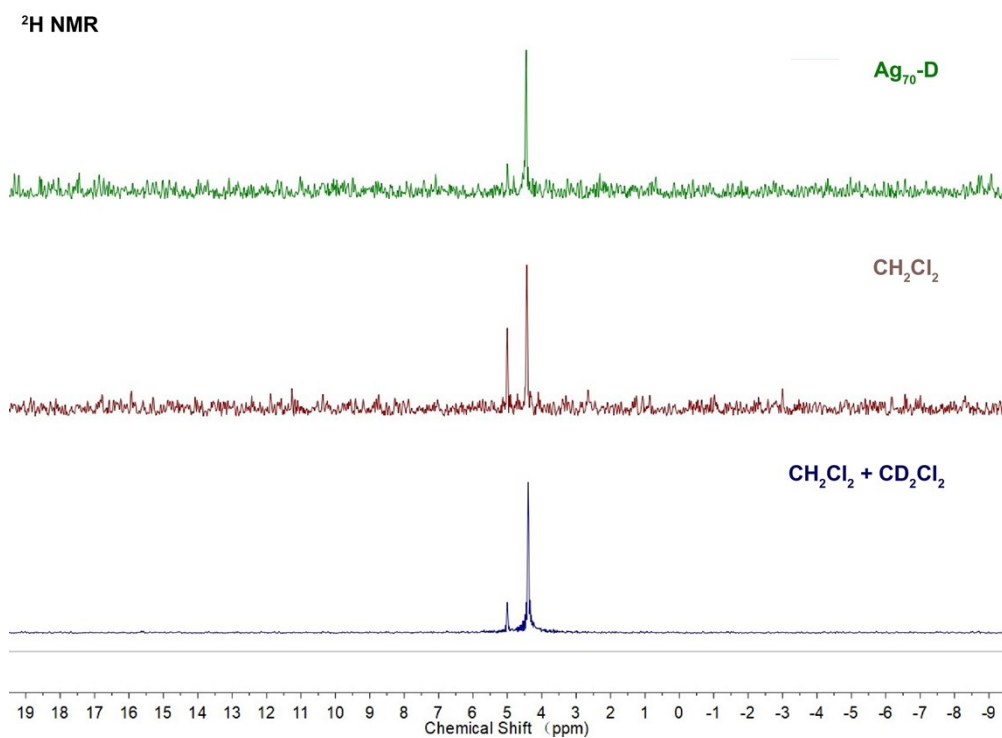

**Figure S6.**  $^2\text{H}$  NMR spectra of  $\text{Ag}_{70}$ -TPP,  $\text{CH}_2\text{Cl}_2$ , and  $\text{CH}_2\text{Cl}_2 + \text{CD}_2\text{Cl}_2$  solvents. All exhibit identical signals at 4.3 and 5.0 ppm, indicating the absence of hydride ligands in  $\text{Ag}_{70}$ -TPP nanoclusters.

$^1\text{H}$  and  $^{31}\text{P}$  NMR spectroscopy were used to probe the chemical composition and the ligand environments of **Ag<sub>70</sub>-TPP**. As shown in Figure S4, the chemical shifts of the peaks in the  $^1\text{H}$  NMR spectrum ranging from 0.9 to 2.3 ppm were attributed to the methyl groups on the thiolate ligands, and those peaks ranging from 5.9-7.7 ppm were associated with the aromatic protons of the TBBT and  $\text{PPh}_3$  ligands. The integral ratio of alkyl-H (0.9-2.3 ppm) to aromatic-H (5.9-7.7 ppm) is about 1 : 0.6, which close to the number ratio of H atoms in  $\text{Ag}_{70}$  cluster  $[(9 * 42) : (15 * 5 + 4 * 42 = 1 : 0.64)]$ . The  $^{31}\text{P}$ -NMR spectrum of  $\text{PPh}_3$  showed a single peak at -4.95 ppm. After combining with Ag in the Ag- $\text{PPh}_3$  complex, the peak in  $^{31}\text{P}$ -NMR spectrum shifted from -4.95 ppm to 18.05 ppm. While the signal of  $\text{PPh}_3$  anchoring on the  $\text{Ag}_{70}$ -TPP nanocluster further shifted to lower field at 29.07 ppm compared with free  $\text{PPh}_3$  and Ag- $\text{PPh}_3$  complex (Figure S5). In addition, the single peak of  $^{31}\text{P}$  in  $\text{Ag}_{70}$ -TPP nanocluster indicating the similar chemical environments of the five phosphine ligand on the cluster, which is consistent with the crystal structure. Finally,  $^2\text{H}$  NMR spectra of **Ag<sub>70</sub>-TPP** (and  $\text{CH}_2\text{Cl}_2$ , and a mixture of  $\text{CD}_2\text{Cl}_2$  and  $\text{CH}_2\text{Cl}_2$ ) are shown in Figure S6. All of these samples exhibit identical signals at 4.3 and 5.0 ppm, indicating the absence of hydride ligands in  $\text{Ag}_{70}$  nanoclusters.

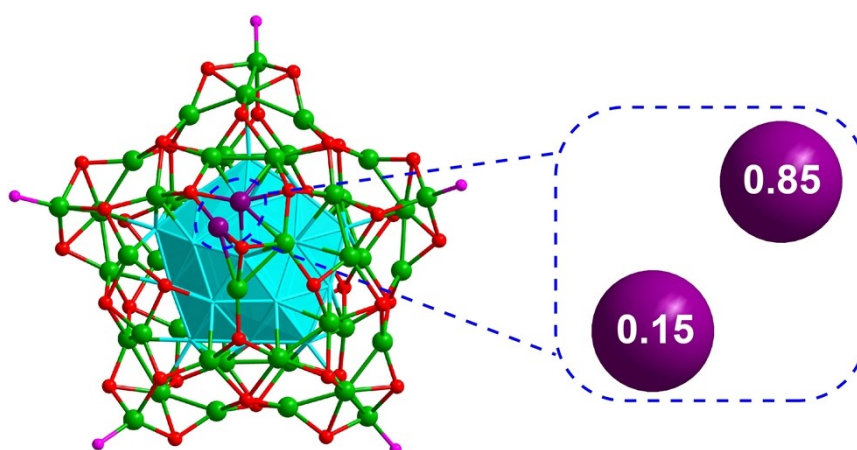

**Figure S7.** The 14th and 17th silver atoms in  $\text{Ag}_{70}$  nanocluster, (insert: partial enlarged view, and the  $\text{Ag}_{14}$  and  $\text{Ag}_{17}$  occupy 0.85 and 0.15 of one Ag atom, respectively).



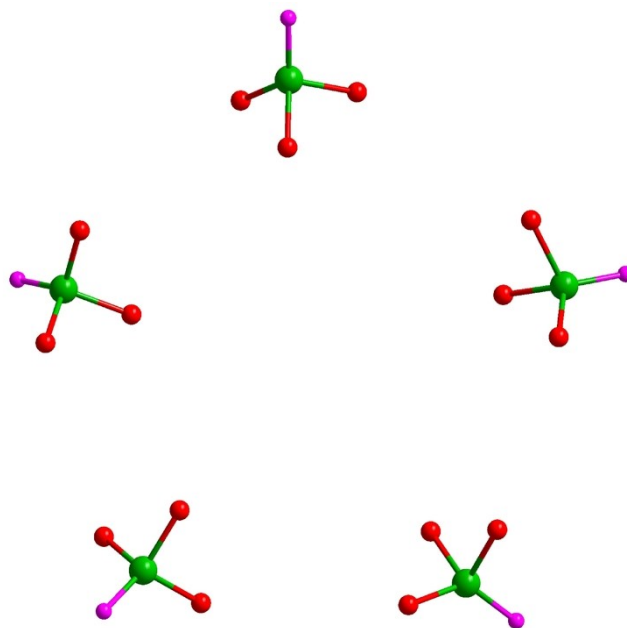

**Figure S8.** The connection mode of phosphine ligands in  $\text{Ag}_{70}$  nanoclusters.

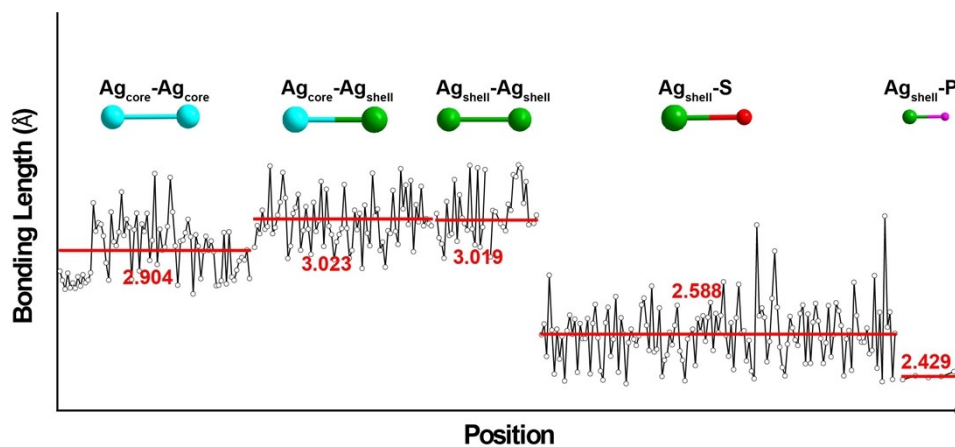

**Figure S9.** The bonding length distributions in the  $\text{Ag}_{70}\text{-TPP}$  nanocluster.

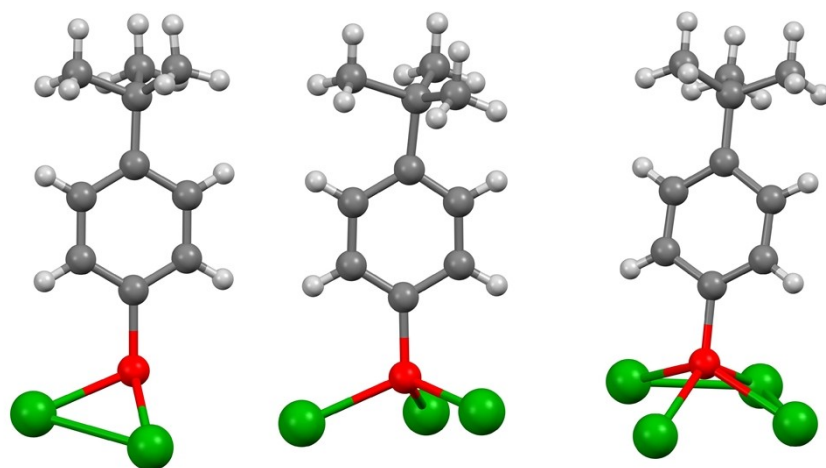

**Figure S10.**  $\mu$ -2,  $\mu$ -3, and  $\mu$ -4 coordinated thiolates of  $\text{Ag}_{70}$  nanoclusters.

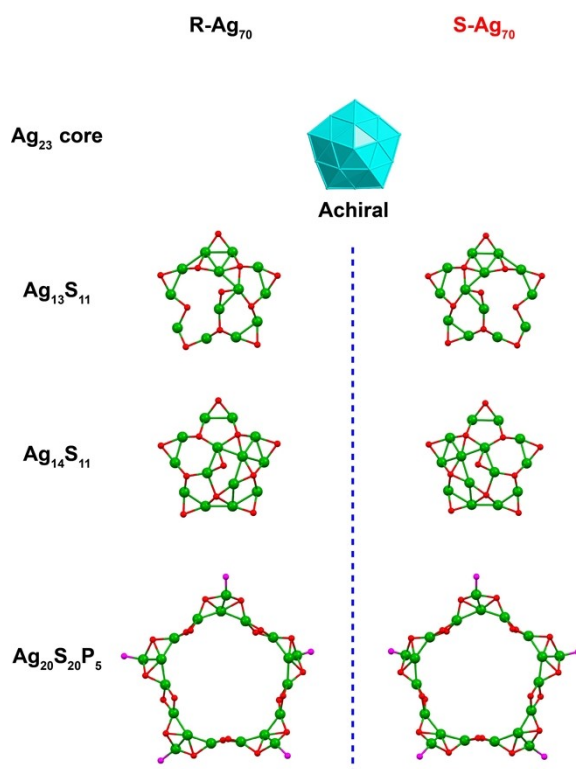

**Figure S11.** Achiral  $\text{Ag}_{23}$  core and chiral shell of  $\text{Ag}_{70}$ -TPP.

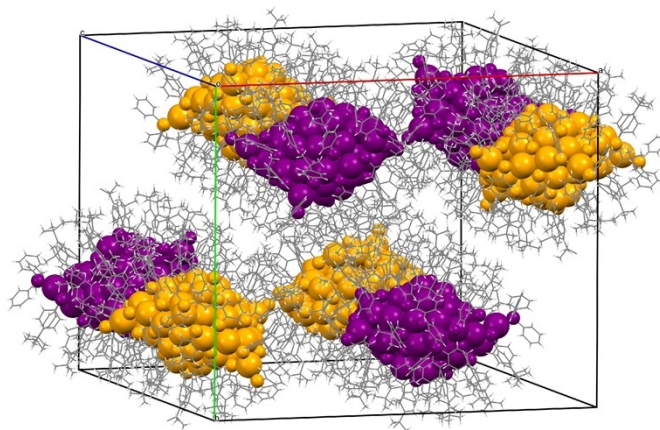

**Figure S12.** Four pairs of enantiomers in the unit cell (**R-Ag<sub>70</sub>** with highlighted in purple, **S-Ag<sub>70</sub>** highlighted with golden).

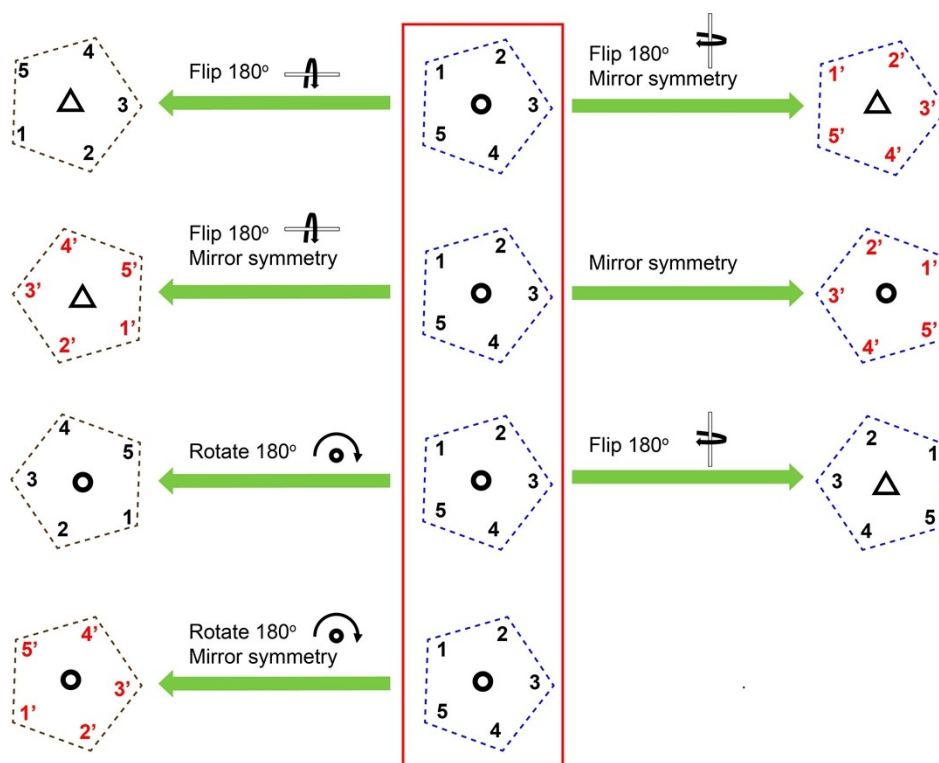

**Figure S13.** Diagram of the relationship between the eight molecules in the unit cell.

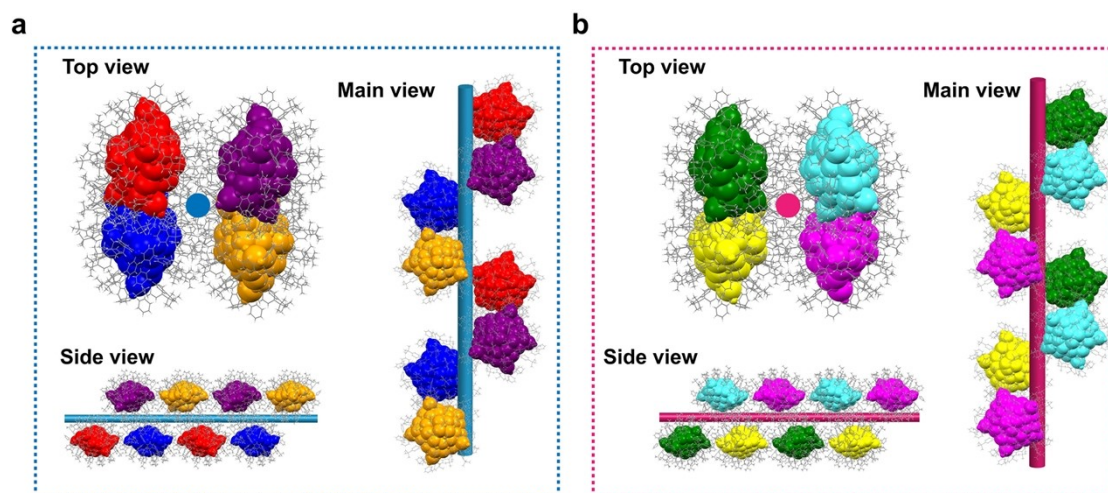

**Figure S14.** The three-views of two helical  $\text{Ag}_{70}\text{-TPP}$ . (a) left-handed, and (b) right-handed helix orientation.

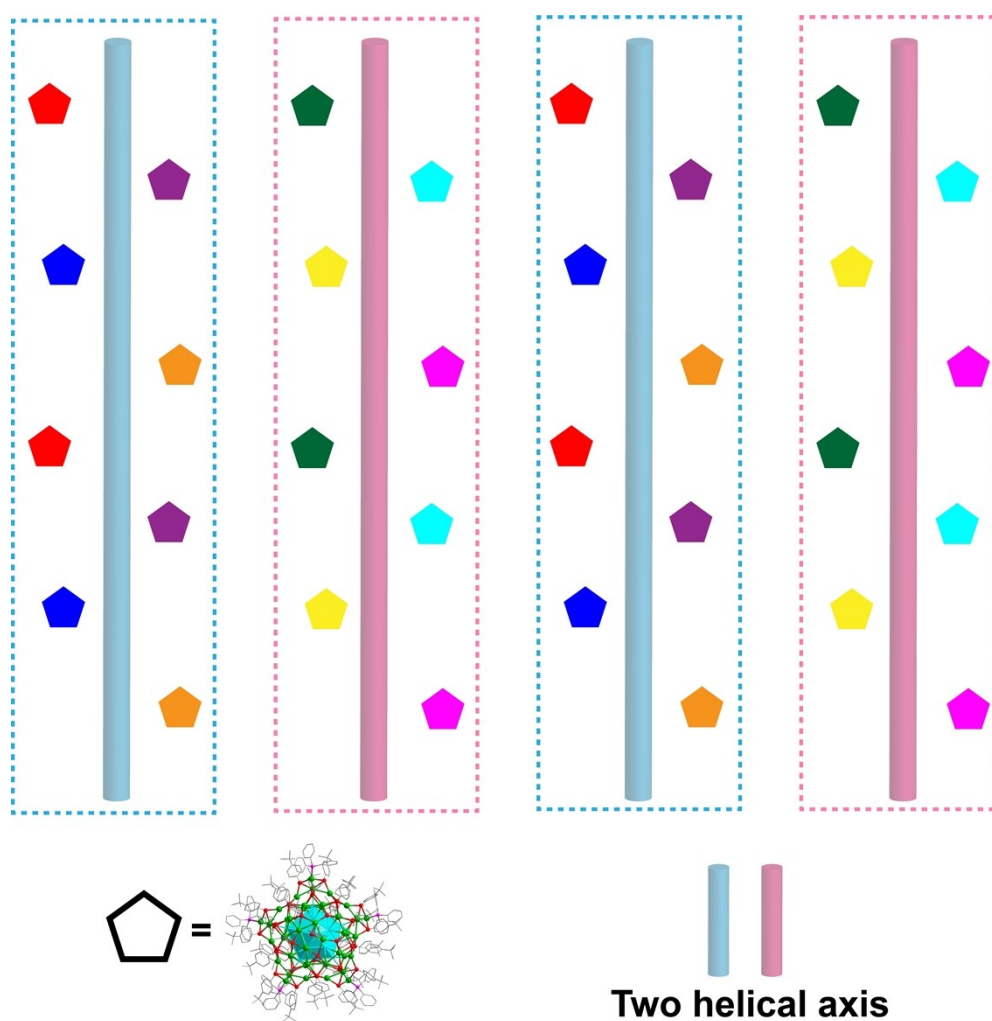

**Figure S15.** Two helical axis with opposite directions alternate arrangement.

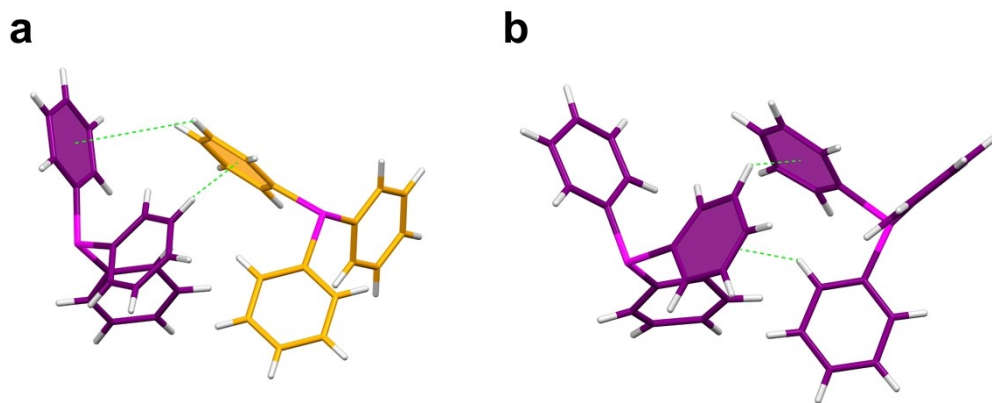

**Figure S16.** The C-H... $\pi$  interactions of adjacent clusters with (a) the opposite chirality, (b) the same chirality.

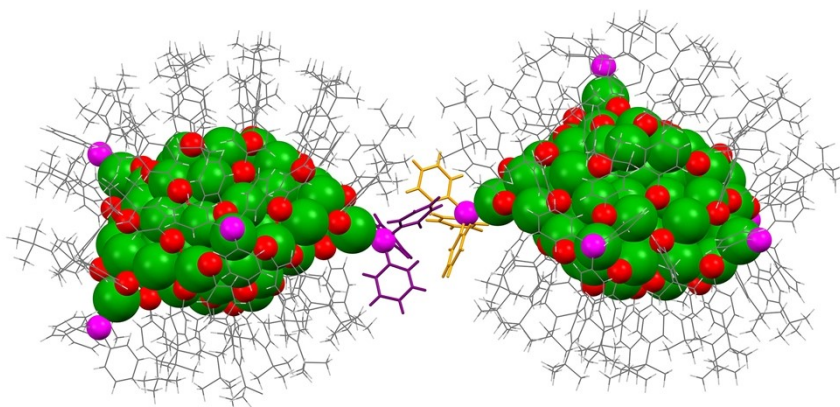

**Figure S17.** The distorted angle of Ag<sub>70</sub>-TPP nanoclusters.

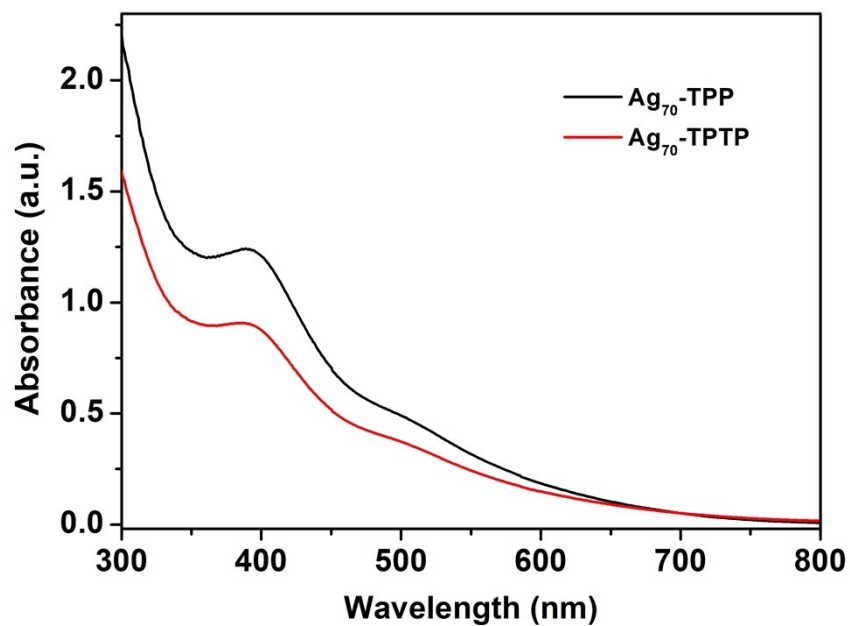

Figure S18. UV-vis spectra of Ag<sub>70</sub>-TPP, and Ag<sub>70</sub>-TPTP nanoclusters.

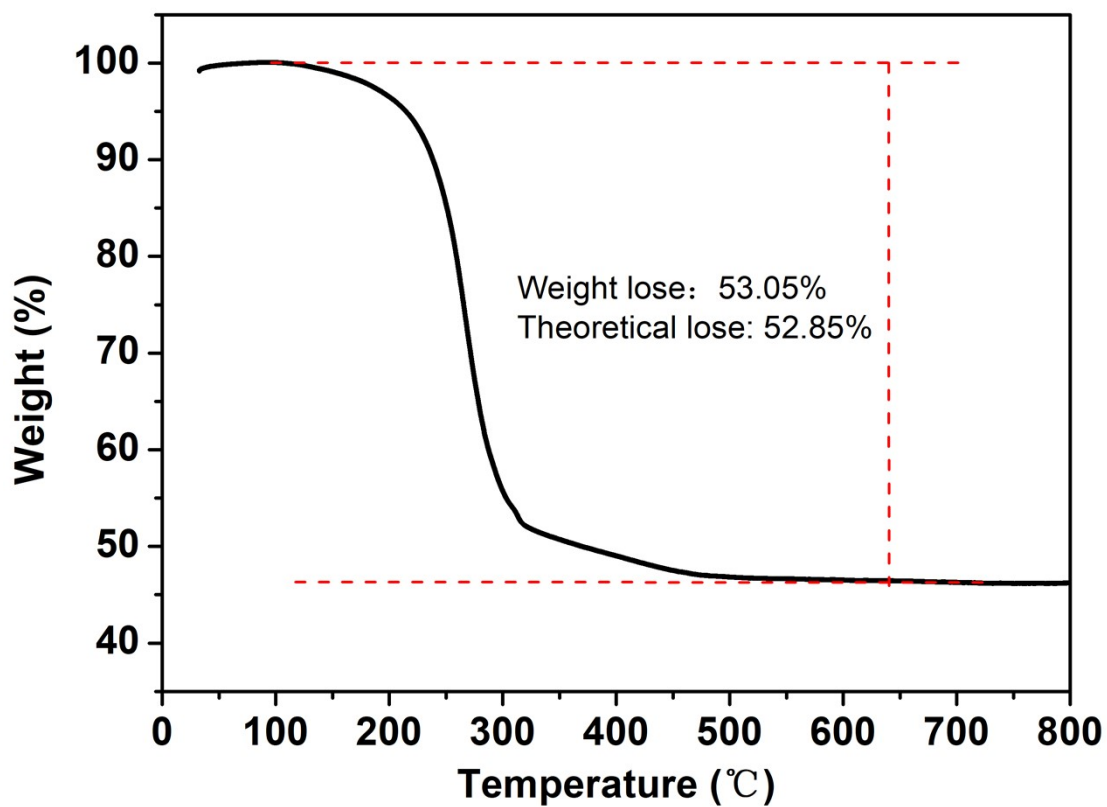

Figure S19. The TGA test of Ag<sub>70</sub>-TPTP nanocluster.

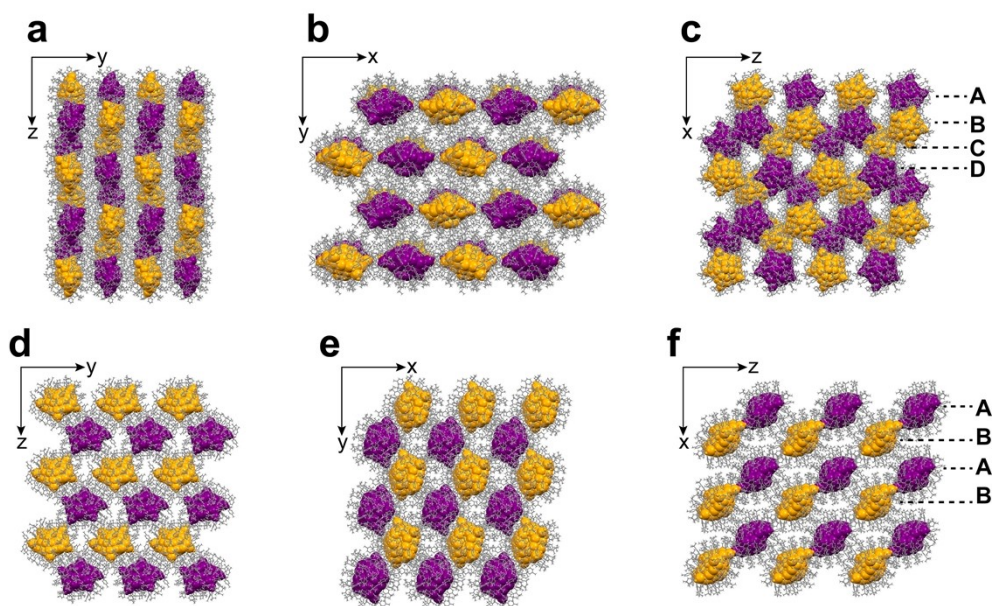

**Figure S20.** The self-assembly of  $\text{Ag}_{70}\text{-TTP}$  clusters on different planes (a) (100), (b) (001), and (c) (010) planes. The self-assembly of  $\text{Ag}_{70}\text{-TPTP}$  clusters on different planes (d) (100), (e) (001), and (f) (010) planes. (*R*-configuration NCs are shown in purple, and the *S*-configuration NCs are shown in golden.)

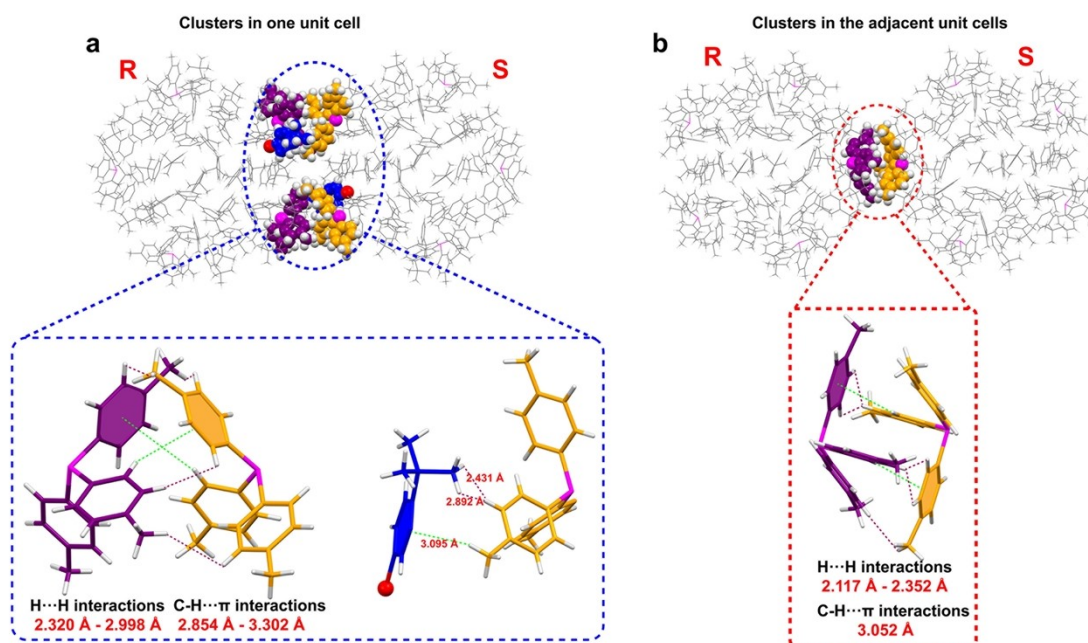

**Figure S21.** The interactions between ligands of two  $\text{Ag}_{70}\text{-TPTP}$  clusters (a) in one unit cell, and (b) in the adjacent unit cells.

**Table S1.** Atomically precise nanoclusters with decahedral cores.<sup>1-8</sup>

| <b>Formula</b>                                                                                                           | <b>Core</b>                                | <b>Average Ag-Ag bond length of decahedral core (Å)</b> |
|--------------------------------------------------------------------------------------------------------------------------|--------------------------------------------|---------------------------------------------------------|
| Ag <sub>70</sub> (SR) <sub>42</sub> (TPP) <sub>5</sub> (this work)                                                       | Decahedral Ag <sub>23</sub>                | 2.904                                                   |
| Au <sub>102</sub> (SR) <sub>44</sub>                                                                                     | Decahedral Au <sub>7</sub>                 | 2.833                                                   |
| Au <sub>103</sub> S <sub>2</sub> (SR) <sub>41</sub>                                                                      | Decahedral Au <sub>7</sub>                 | 2.839                                                   |
| Au <sub>52</sub> Cu <sub>72</sub> (SR) <sub>55</sub> <sup>+</sup>                                                        | Decahedral Au <sub>5</sub> Cu <sub>2</sub> | 2.728                                                   |
| Ag <sub>136</sub> (SR) <sub>64</sub> Cl <sub>3</sub> <sup>-</sup>                                                        | Decahedral Ag <sub>54</sub>                | 2.870                                                   |
| Ag <sub>146</sub> (SR) <sub>80</sub> Br <sub>2</sub>                                                                     | Decahedral Ag <sub>7</sub>                 | 2.782                                                   |
| Ag <sub>206</sub> (SR) <sub>68</sub> F <sub>2</sub> Cl <sub>2</sub>                                                      | Decahedral Ag <sub>7</sub>                 | 2.873                                                   |
| Ag <sub>210</sub> (SR) <sub>71</sub> (TPP) <sub>5</sub> Cl<br>Ag <sub>211</sub> (SR) <sub>71</sub> (TPP) <sub>6</sub> Cl | Decahedral Ag <sub>7</sub>                 | 2.867                                                   |
| Au <sub>246</sub> (SR) <sub>80</sub>                                                                                     | Decahedral Au <sub>7</sub>                 | 2.854                                                   |

**Table S2.** Comparison of helix parameters between Alpha-keratin,<sup>9</sup> TMV,<sup>10</sup> and Ag<sub>70</sub>-TPP.

|                              | Alpha-keratin | TMV    | Ag <sub>70</sub> -TPP |
|------------------------------|---------------|--------|-----------------------|
| pitch                        | 0.54 nm       | 2.3 nm | 2.6 nm                |
| core diameter                | 0.46 nm       | 4.0 nm | 1.4 nm                |
| number of units/pitch length | 3.6           | 16.3   | 4                     |



**Table S3.** Crystal data and structure refinement for **Ag<sub>70</sub>-TPP**.

|                                   |                                                                                                                    |                 |
|-----------------------------------|--------------------------------------------------------------------------------------------------------------------|-----------------|
| CCDC number                       | 2053704                                                                                                            |                 |
| Empirical formula                 | C <sub>530</sub> H <sub>681</sub> Ag <sub>70</sub> Cl <sub>20</sub> O <sub>10</sub> P <sub>5</sub> S <sub>42</sub> |                 |
| Formula weight                    | 16973.41                                                                                                           |                 |
| Temperature                       | 170.15 K                                                                                                           |                 |
| Wavelength                        | GaK $\alpha$ ( $\lambda$ = 1.34139 Å)                                                                              |                 |
| Crystal system                    | Orthorhombic                                                                                                       |                 |
| Space group                       | P bca                                                                                                              |                 |
| Unit cell dimensions              | a = 52.3137(13) Å                                                                                                  | $\alpha$ = 90°. |
|                                   | b = 43.7351(10) Å                                                                                                  | $\beta$ = 90°.  |
|                                   | c = 56.8946(14) Å                                                                                                  | $\gamma$ = 90°. |
| Volume                            | 130172(5) Å <sup>3</sup>                                                                                           |                 |
| Z                                 | 8                                                                                                                  |                 |
| Density (calculated)              | 1.732 Mg/m <sup>3</sup>                                                                                            |                 |
| Absorption coefficient            | 12.119 mm <sup>-1</sup>                                                                                            |                 |
| F(000)                            | 61744                                                                                                              |                 |
| Crystal size                      | 0.25 x 0.2 x 0.15 mm <sup>3</sup>                                                                                  |                 |
| Theta range for data collection   | 5.872 to 110.146°.                                                                                                 |                 |
| Index ranges                      | -63 ≤ h ≤ 63, -53 ≤ k ≤ 53, -69 ≤ l ≤ 56                                                                           |                 |
| Reflections collected             | 899954                                                                                                             |                 |
| Independent reflections           | 123852 [R(int) = 0.1103]                                                                                           |                 |
| Completeness to theta = 53.594°   | 99.8 %                                                                                                             |                 |
| Max. and min. transmission        | 0.7508 and 0.2485                                                                                                  |                 |
| Refinement method                 | Full-matrix-block least-squares on F <sup>2</sup>                                                                  |                 |
| Data / restraints / parameters    | 123853 / 134 / 5441                                                                                                |                 |
| Goodness-of-fit on F <sup>2</sup> | 1.208                                                                                                              |                 |
| Final R indices [I > 2σ(I)]       | R <sub>1</sub> = 0.0992, wR <sub>2</sub> = 0.2910                                                                  |                 |
| R indices (all data)              | R <sub>1</sub> = 0.1188, wR <sub>2</sub> = 0.3110                                                                  |                 |
| Extinction coefficient            | 0.0000349(12)                                                                                                      |                 |
| Largest diff. peak and hole       | 5.24 and -3.18 e.Å <sup>-3</sup>                                                                                   |                 |

**Table S4.** Crystal data and structure refinement for **Ag<sub>70</sub>-TPTP**.

|                                             |                                                                                                                    |
|---------------------------------------------|--------------------------------------------------------------------------------------------------------------------|
| CCDC number                                 | 2053542                                                                                                            |
| Empirical formula                           | C <sub>545</sub> H <sub>711</sub> Ag <sub>70</sub> Cl <sub>20</sub> O <sub>10</sub> P <sub>5</sub> S <sub>42</sub> |
| Formula weight                              | 17183.37                                                                                                           |
| Temperature/K                               | 120                                                                                                                |
| Crystal system                              | triclinic                                                                                                          |
| Space group                                 | P-1                                                                                                                |
| a/Å                                         | 29.5179(5)                                                                                                         |
| b/Å                                         | 31.2818(7)                                                                                                         |
| c/Å                                         | 36.0436(6)                                                                                                         |
| α/°                                         | 92.807(2)                                                                                                          |
| β/°                                         | 94.5050(10)                                                                                                        |
| γ/°                                         | 94.460(2)                                                                                                          |
| Volume/Å <sup>3</sup>                       | 33027.6(11)                                                                                                        |
| Z                                           | 2                                                                                                                  |
| Density (calculated)                        | 1.728 Mg/m <sup>3</sup>                                                                                            |
| μ/mm-1                                      | 17.862                                                                                                             |
| F(000)                                      | 15676.0                                                                                                            |
| Crystal size/mm <sup>3</sup>                | 0.02 × 0.005 × 0.005                                                                                               |
| Radiation                                   | CuKα (λ = 1.54186)                                                                                                 |
| 2θ range for data collection/°              | 6.87 to 129.998                                                                                                    |
| Index ranges                                | -33 ≤ h ≤ 34, -29 ≤ k ≤ 36, -33 ≤ l ≤ 42                                                                           |
| Reflections collected                       | 222499                                                                                                             |
| Independent reflections                     | 106868 [Rint = 0.1044, Rsigma = 0.2954]                                                                            |
| Data/restraints/parameters                  | 106868/5491/4531                                                                                                   |
| Goodness-of-fit on F <sup>2</sup>           | 0.646                                                                                                              |
| Final R indexes [I ≥ 2σ (I)]                | R <sub>1</sub> = 0.0926, wR <sub>2</sub> = 0.2357                                                                  |
| Final R indexes [all data]                  | R <sub>1</sub> = 0.1899, wR <sub>2</sub> = 0.2677                                                                  |
| Largest diff. peak/hole / e Å <sup>-3</sup> | 3.31/-1.87                                                                                                         |

## References

1. P. D. Jadzinsky, G. Calero, C. J. Ackerson, D. Bushnell, R. D. Kornberg, *Science*, 2007, **318**, 430.
2. T. Higaki, C. Liu, M. Zhou, T. Luo, N. L. Rosi, R. Jin, *J. Am. Chem. Soc.*, 2017, **139**, 9994-10001.
3. Y. Song, Y. Li, H. Li, F. Ke, J. Xiang, C. Zhou, P. Li, M. Zhu, R. Jin, *Nat. Commun.*, 2020, **11**, 478.
4. H. Yang, Y. Wang, X. Chen, X. Zhao, L. Gu, H. Huang, J. Yan, C. Xu, G. Li, J. Wu, A. J. Edwards, B. Dittrich, Z. Tang, D. Wang, L. Lehtovaara, H. Häkkinen, N. Zheng, *Nat. Commun.*, 2016, **7**, 12809.
5. Y. Song, K. Lambright, M. Zhou, K. Kirschbaum, J. Xiang, A. Xia, M. Zhu, R. Jin, *ACS Nano*, 2018, **12**, 9318-9325.
6. J. Yan, J. Zhang, X. Chen, S. Malola, B. Zhou, E. Selenius, X. Zhang, P. Yuan, G. Deng, K. Liu, H. Su, B. K. Teo, H. Häkkinen, L. Zheng, N. Zheng, *Natl. Sci. Rev.*, 2018, **5**, 694-702.
7. J. Liu, F. Alkan, Z. Wang, Z. Zhang, M. Kurmoo, Z. Yan, Q. Zhao, C. M. Aikens, C. Tung, D. Sun, *Angew. Chem. Int. Ed.*, 2019, **58**, 195-199.
8. C. Zeng, Y. Chen, K. Kirschbaum, K. J. Lambright, R. Jin, *Science*, 2016, **354**, 1580-1584.
9. R. D. B. Fraser, T. P. MacRae, E. Suzuki, *J. M. Biol.*, 1976, **108**, 435-452.
10. X. Z. Fan, E. Pomerantseva, M. Gnerlich, A. Brown, K. Gerasopoulos, M. Mccarthy, J. Culver, R. Ghodssi, *J. Vac. Sci. Technol., A*, 2013, **31**, 050815.

**Table S5. Bond Lengths for Ag<sub>70</sub>-TPP.**

| Atom | Atom | Length/Å   | Atom | Atom | Length/Å  |
|------|------|------------|------|------|-----------|
| Ag1  | Ag2  | 2.7591(8)  | C31  | C32  | 1.37(3)   |
| Ag1  | Ag8  | 2.7616(10) | C32  | C33  | 1.44(3)   |
| Ag1  | Ag9  | 2.7798(10) | C33  | C34  | 1.36(2)   |
| Ag1  | Ag14 | 2.9751(14) | C33  | C36  | 1.46(3)   |
| Ag1  | Ag15 | 3.0163(11) | C34  | C35  | 1.34(2)   |
| Ag1  | Ag16 | 2.8813(13) | C36  | C37  | 1.59(3)   |
| Ag1  | Ag17 | 2.974(19)  | C36  | C38  | 1.50(3)   |
| Ag1  | Ag19 | 2.8183(10) | C36  | C497 | 1.44(3)   |
| Ag1  | Ag20 | 2.8269(10) | C39  | C40  | 1.38(2)   |
| Ag1  | Ag21 | 2.7917(10) | C39  | C44  | 1.40(2)   |
| Ag2  | Ag3  | 2.8111(8)  | C40  | C41  | 1.36(2)   |
| Ag2  | Ag4  | 3.0495(11) | C41  | C42  | 1.35(2)   |
| Ag2  | Ag8  | 3.1257(10) | C42  | C43  | 1.36(2)   |
| Ag2  | Ag9  | 2.9373(11) | C42  | C45  | 1.59(3)   |
| Ag2  | Ag10 | 3.1792(11) | C43  | C44  | 1.47(2)   |
| Ag2  | Ag19 | 3.0337(11) | C45  | C46  | 1.54(3)   |
| Ag2  | Ag20 | 3.0053(11) | C45  | C47  | 1.54(3)   |
| Ag2  | Ag21 | 2.9433(11) | C45  | C48  | 1.62(3)   |
| Ag2  | Ag23 | 2.9926(11) | C49  | C50  | 1.35(2)   |
| Ag2  | Ag39 | 2.9154(11) | C49  | C54  | 1.44(2)   |
| Ag2  | Ag40 | 2.9047(10) | C50  | C51  | 1.45(2)   |
| Ag3  | Ag4  | 2.7702(9)  | C51  | C52  | 1.41(3)   |
| Ag3  | Ag10 | 2.7931(10) | C52  | C53  | 1.21(3)   |
| Ag3  | Ag23 | 2.7595(10) | C53  | C54  | 1.46(3)   |
| Ag3  | Ag34 | 3.2143(12) | C55  | C56  | 1.46(2)   |
| Ag3  | Ag39 | 2.7828(10) | C55  | C60  | 1.38(2)   |
| Ag3  | Ag40 | 2.8038(11) | C56  | C57  | 1.30(3)   |
| Ag3  | Ag49 | 3.2699(13) | C57  | C58  | 1.34(3)   |
| Ag3  | Ag50 | 2.9047(10) | C58  | C59  | 1.47(3)   |
| Ag3  | Ag51 | 2.9184(12) | C59  | C60  | 1.37(2)   |
| Ag4  | Ag5  | 2.8999(11) | C61  | C62  | 1.33(3)   |
| Ag4  | Ag6  | 2.7703(9)  | C61  | C66  | 1.41(2)   |
| Ag4  | Ag7  | 2.9047(11) | C62  | C63  | 1.35(3)   |
| Ag4  | Ag8  | 3.0220(9)  | C63  | C64  | 1.45(3)   |
| Ag4  | Ag10 | 2.9410(11) | C64  | C65  | 1.31(3)   |
| Ag4  | Ag23 | 2.9623(11) | C65  | C66  | 1.39(2)   |
| Ag4  | Ag33 | 2.9766(12) | C67  | C68  | 1.319(17) |
| Ag4  | Ag34 | 2.9270(11) | C67  | C72  | 1.47(2)   |

|     |      |            |      |      |           |
|-----|------|------------|------|------|-----------|
| Ag4 | Ag35 | 3.0008(12) | C68  | C69  | 1.48(2)   |
| Ag5 | Ag6  | 2.8778(11) | C69  | C70  | 1.36(2)   |
| Ag5 | Ag8  | 2.9620(11) | C70  | C71  | 1.44(3)   |
| Ag5 | Ag9  | 2.9215(11) | C70  | C73  | 1.557(17) |
| Ag5 | Ag10 | 2.9733(10) | C71  | C72  | 1.35(2)   |
| Ag5 | Ag12 | 2.8640(10) | C73  | C74  | 1.545(17) |
| Ag5 | Ag28 | 3.1690(11) | C73  | C75  | 1.520(17) |
| Ag5 | Ag29 | 3.0242(11) | C73  | C76  | 1.517(17) |
| Ag5 | Ag30 | 3.6400(15) | C77  | C82  | 1.3900    |
| Ag5 | Ag35 | 3.1520(12) | C77  | C78  | 1.3900    |
| Ag5 | Ag36 | 3.1960(11) | C82  | C81  | 1.3900    |
| Ag5 | Ag69 | 3.3721(14) | C81  | C80  | 1.3900    |
| Ag6 | Ag7  | 2.8688(11) | C80  | C79  | 1.3900    |
| Ag6 | Ag8  | 2.7948(10) | C80  | C83  | 1.552(12) |
| Ag6 | Ag27 | 2.9645(11) | C79  | C78  | 1.3900    |
| Ag6 | Ag28 | 2.8992(11) | C83  | C84  | 1.532(13) |
| Ag6 | Ag30 | 3.4552(16) | C83  | C85  | 1.524(13) |
| Ag6 | Ag31 | 2.9675(12) | C83  | C86  | 1.536(13) |
| Ag6 | Ag32 | 3.3715(17) | C87  | C88  | 1.345(18) |
| Ag6 | Ag33 | 2.9679(11) | C87  | C92  | 1.428(18) |
| Ag6 | Ag35 | 3.0594(11) | C88  | C89  | 1.41(2)   |
| Ag7 | Ag8  | 2.9831(11) | C89  | C90  | 1.35(2)   |
| Ag7 | Ag21 | 2.9826(12) | C90  | C91  | 1.39(2)   |
| Ag7 | Ag23 | 2.9198(10) | C90  | C93  | 1.543(16) |
| Ag7 | Ag24 | 2.9057(11) | C91  | C92  | 1.41(2)   |
| Ag7 | Ag26 | 2.9635(12) | C93  | C94  | 1.518(17) |
| Ag7 | Ag27 | 3.1541(11) | C93  | C95  | 1.503(17) |
| Ag7 | Ag32 | 3.5215(15) | C93  | C96  | 1.533(17) |
| Ag7 | Ag33 | 3.1308(12) | C97  | C98  | 1.3900    |
| Ag7 | Ag64 | 3.0445(12) | C97  | C102 | 1.3900    |
| Ag8 | Ag9  | 2.9719(11) | C98  | C99  | 1.3900    |
| Ag8 | Ag15 | 3.1659(12) | C99  | C100 | 1.3900    |
| Ag8 | Ag21 | 2.9905(12) | C100 | C101 | 1.3900    |
| Ag8 | Ag27 | 2.9858(12) | C100 | C103 | 1.540(15) |
| Ag8 | Ag28 | 3.0768(12) | C101 | C102 | 1.3900    |
| Ag9 | Ag10 | 3.0494(10) | C103 | C104 | 1.488(16) |
| Ag9 | Ag11 | 2.8578(10) | C103 | C105 | 1.536(17) |
| Ag9 | Ag12 | 2.7930(10) | C103 | C106 | 1.540(16) |
| Ag9 | Ag13 | 2.9983(12) | C107 | C112 | 1.3900    |
| Ag9 | Ag14 | 2.8407(13) | C107 | C108 | 1.3900    |

|           |            |           |           |
|-----------|------------|-----------|-----------|
| Ag9 Ag19  | 3.0099(11) | C112 C111 | 1.3900    |
| Ag9 Ag29  | 2.9972(11) | C111 C110 | 1.3900    |
| Ag10 Ag11 | 2.9711(11) | C110 C109 | 1.3900    |
| Ag10 Ag12 | 2.7778(10) | C109 C108 | 1.3900    |
| Ag10 Ag36 | 3.0338(12) | C113 C114 | 1.3900    |
| Ag10 Ag37 | 3.0679(12) | C113 C118 | 1.3900    |
| Ag10 Ag39 | 2.9707(11) | C114 C115 | 1.3900    |
| Ag10 Ag51 | 3.3719(13) | C115 C116 | 1.3900    |
| Ag11 Ag12 | 2.8297(10) | C116 C117 | 1.3900    |
| Ag11 Ag13 | 3.1471(11) | C117 C118 | 1.3900    |
| Ag11 Ag18 | 3.0605(11) | C119 C120 | 1.39(2)   |
| Ag11 Ag19 | 3.0852(11) | C119 C124 | 1.36(2)   |
| Ag11 Ag37 | 3.2439(12) | C120 C121 | 1.38(2)   |
| Ag11 Ag38 | 3.0441(11) | C121 C122 | 1.31(2)   |
| Ag11 Ag39 | 2.9425(11) | C122 C123 | 1.39(2)   |
| Ag11 Ag42 | 2.7912(10) | C122 C125 | 1.546(15) |
| Ag11 Ag66 | 3.5897(15) | C123 C124 | 1.36(2)   |
| Ag12 Ag13 | 3.0127(10) | C125 C126 | 1.487(16) |
| Ag12 Ag29 | 3.0050(9)  | C125 C127 | 1.524(16) |
| Ag12 Ag36 | 2.9223(10) | C125 C128 | 1.549(16) |
| Ag12 Ag37 | 2.9794(10) | C129 C130 | 1.416(19) |
| Ag12 Ag67 | 3.5620(16) | C129 C134 | 1.343(18) |
| Ag12 Ag68 | 3.0553(12) | C130 C131 | 1.39(2)   |
| Ag12 Ag69 | 3.2255(15) | C131 C132 | 1.47(2)   |
| Ag13 Ag14 | 3.1665(16) | C132 C133 | 1.38(2)   |
| Ag13 Ag18 | 3.2140(12) | C132 C135 | 1.51(2)   |
| Ag13 Ag29 | 3.0376(12) | C133 C134 | 1.436(19) |
| Ag13 S2   | 2.554(3)   | C135 C136 | 1.61(3)   |
| Ag13 S31  | 2.710(3)   | C135 C137 | 1.59(3)   |
| Ag13 S36  | 2.564(3)   | C135 C138 | 1.44(3)   |
| Ag14 Ag15 | 3.0044(17) | C139 C140 | 1.38(2)   |
| Ag14 Ag29 | 3.0860(17) | C139 C144 | 1.431(18) |
| Ag14 S2   | 2.425(3)   | C140 C141 | 1.39(2)   |
| Ag14 S4   | 2.431(4)   | C141 C142 | 1.41(2)   |
| Ag15 Ag16 | 3.1143(19) | C142 C143 | 1.31(2)   |
| Ag15 Ag17 | 3.21(2)    | C142 C145 | 1.56(3)   |
| Ag15 Ag27 | 3.6686(17) | C143 C144 | 1.41(2)   |
| Ag15 S1   | 2.586(5)   | C145 C146 | 1.64(3)   |
| Ag15 S3   | 2.475(3)   | C145 C147 | 1.47(3)   |
| Ag15 S4   | 2.578(4)   | C145 C148 | 1.47(3)   |

|           |            |           |           |
|-----------|------------|-----------|-----------|
| Ag16 Ag17 | 3.09(2)    | C149 C150 | 1.302(18) |
| Ag16 S1   | 2.426(5)   | C149 C154 | 1.383(19) |
| Ag16 S17  | 2.494(4)   | C150 C151 | 1.394(19) |
| Ag17 S1   | 2.085(19)  | C151 C152 | 1.40(2)   |
| Ag17 S2   | 2.44(2)    | C152 C153 | 1.40(2)   |
| Ag18 Ag19 | 2.9035(11) | C152 C155 | 1.536(13) |
| Ag18 Ag42 | 2.9349(10) | C153 C154 | 1.36(2)   |
| Ag18 Ag43 | 3.1543(15) | C155 C156 | 1.527(13) |
| Ag18 Ag66 | 3.4154(15) | C155 C157 | 1.522(13) |
| Ag18 S2   | 2.657(3)   | C155 C502 | 1.549(13) |
| Ag18 S29  | 2.583(3)   | C158 C159 | 1.3900    |
| Ag18 S31  | 2.665(3)   | C158 C163 | 1.3900    |
| Ag19 Ag20 | 2.9590(11) | C159 C160 | 1.3900    |
| Ag19 Ag39 | 3.3731(10) | C160 C161 | 1.3900    |
| Ag19 Ag41 | 2.9772(10) | C161 C162 | 1.3900    |
| Ag19 Ag42 | 2.8202(9)  | C161 C164 | 1.512(16) |
| Ag19 Ag43 | 3.1970(17) | C162 C163 | 1.3900    |
| Ag19 S9   | 2.904(4)   | C164 C165 | 1.528(5)  |
| Ag20 Ag21 | 3.0451(11) | C164 C166 | 1.528(5)  |
| Ag20 Ag22 | 2.9768(11) | C164 C167 | 1.526(5)  |
| Ag20 Ag40 | 3.5057(10) | C168 C169 | 1.377(18) |
| Ag20 Ag41 | 3.0444(10) | C168 C173 | 1.34(2)   |
| Ag20 Ag46 | 2.8274(9)  | C169 C170 | 1.42(2)   |
| Ag20 Ag58 | 2.8884(12) | C170 C171 | 1.35(2)   |
| Ag20 S9   | 2.726(3)   | C171 C172 | 1.49(3)   |
| Ag21 Ag22 | 2.8662(11) | C171 C174 | 1.564(17) |
| Ag21 Ag23 | 3.1928(10) | C172 C173 | 1.34(3)   |
| Ag21 Ag24 | 2.8496(10) | C174 C175 | 1.570(16) |
| Ag21 Ag25 | 2.9971(13) | C174 C4AA | 1.526(16) |
| Ag21 Ag26 | 2.9358(12) | C174 C3AA | 1.547(16) |
| Ag22 Ag23 | 2.9562(11) | C176 C177 | 1.378(19) |
| Ag22 Ag24 | 2.7969(11) | C176 C181 | 1.331(18) |
| Ag22 Ag25 | 3.3376(13) | C177 C178 | 1.38(2)   |
| Ag22 Ag40 | 2.9577(11) | C178 C179 | 1.30(2)   |
| Ag22 Ag46 | 2.7730(10) | C179 C180 | 1.39(2)   |
| Ag22 Ag47 | 2.9875(10) | C179 C182 | 1.55(2)   |
| Ag22 Ag48 | 3.3388(12) | C180 C181 | 1.35(2)   |
| Ag22 Ag57 | 3.6708(14) | C182 C183 | 1.55(3)   |
| Ag22 Ag58 | 3.0858(12) | C182 C184 | 1.54(3)   |
| Ag22 Ag60 | 3.6467(16) | C182 C185 | 1.49(3)   |

|           |            |           |           |
|-----------|------------|-----------|-----------|
| Ag23 Ag24 | 2.7403(10) | C186 C187 | 1.317(19) |
| Ag23 Ag40 | 3.0200(11) | C186 C191 | 1.45(2)   |
| Ag23 Ag48 | 2.9831(12) | C187 C188 | 1.357(19) |
| Ag23 Ag49 | 2.9678(11) | C188 C189 | 1.39(2)   |
| Ag23 Ag64 | 3.0777(13) | C189 C190 | 1.33(2)   |
| Ag24 Ag25 | 3.1368(12) | C189 C0AA | 1.538(16) |
| Ag24 Ag26 | 2.8711(10) | C190 C191 | 1.32(2)   |
| Ag24 Ag48 | 3.0526(10) | C192 C193 | 1.338(19) |
| Ag24 Ag60 | 3.2388(19) | C192 C197 | 1.36(2)   |
| Ag24 Ag61 | 2.9985(12) | C193 C194 | 1.40(2)   |
| Ag24 Ag62 | 3.6536(18) | C194 C195 | 1.38(2)   |
| Ag24 Ag64 | 2.8358(12) | C195 C196 | 1.41(2)   |
| Ag25 Ag26 | 2.9781(14) | C195 C198 | 1.509(16) |
| Ag25 Ag58 | 3.3449(14) | C196 C197 | 1.34(2)   |
| Ag25 Ag60 | 3.5385(18) | C198 C199 | 1.544(16) |
| Ag25 S16  | 2.777(3)   | C198 C200 | 1.527(16) |
| Ag25 S17  | 2.521(3)   | C198 C493 | 1.509(16) |
| Ag25 S25  | 2.547(3)   | C202 C203 | 1.3900    |
| Ag26 Ag27 | 3.3020(14) | C202 C207 | 1.3900    |
| Ag26 Ag62 | 3.306(2)   | C203 C204 | 1.3900    |
| Ag26 S3   | 2.557(3)   | C204 C205 | 1.3900    |
| Ag26 S21  | 2.660(3)   | C205 C206 | 1.3900    |
| Ag26 S25  | 2.619(3)   | C205 C485 | 1.544(12) |
| Ag27 Ag28 | 3.0780(14) | C206 C207 | 1.3900    |
| Ag27 Ag32 | 3.4448(18) | C208 C209 | 1.383(19) |
| Ag27 S3   | 2.571(4)   | C208 C213 | 1.41(2)   |
| Ag27 S21  | 2.790(3)   | C209 C210 | 1.47(2)   |
| Ag27 S41  | 2.565(3)   | C210 C211 | 1.30(2)   |
| Ag28 Ag29 | 3.3354(13) | C211 C212 | 1.378(19) |
| Ag28 Ag30 | 3.4612(17) | C211 C214 | 1.56(2)   |
| Ag28 S4   | 2.679(3)   | C212 C213 | 1.39(2)   |
| Ag28 S5   | 2.586(3)   | C214 C215 | 1.54(3)   |
| Ag28 S41  | 2.557(3)   | C214 C216 | 1.54(3)   |
| Ag29 Ag69 | 3.2660(15) | C214 C217 | 1.52(3)   |
| Ag29 S4   | 2.616(3)   | C218 C219 | 1.30(2)   |
| Ag29 S5   | 2.707(3)   | C218 C223 | 1.34(2)   |
| Ag29 S36  | 2.608(3)   | C219 C220 | 1.40(3)   |
| Ag30 Ag31 | 2.9393(17) | C220 C221 | 1.37(2)   |
| Ag30 Ag35 | 3.4454(16) | C221 C222 | 1.30(2)   |
| Ag30 Ag69 | 3.6403(16) | C222 C223 | 1.37(2)   |



|           |            |           |           |
|-----------|------------|-----------|-----------|
| Ag30 S5   | 2.694(3)   | C224 C229 | 1.3900    |
| Ag30 S32  | 2.478(3)   | C224 C225 | 1.3900    |
| Ag30 S42  | 2.419(4)   | C229 C228 | 1.3900    |
| Ag31 Ag32 | 2.9672(18) | C228 C227 | 1.3900    |
| Ag31 Ag71 | 3.1726(13) | C227 C226 | 1.3900    |
| Ag31 S39  | 2.593(3)   | C226 C225 | 1.3900    |
| Ag31 S40  | 2.577(4)   | C230 C231 | 1.32(2)   |
| Ag31 S42  | 2.669(4)   | C230 C235 | 1.31(2)   |
| Ag32 Ag33 | 3.4359(15) | C231 C232 | 1.40(2)   |
| Ag32 Ag62 | 3.5200(18) | C232 C233 | 1.30(2)   |
| Ag32 S6   | 2.513(3)   | C233 C234 | 1.48(2)   |
| Ag32 S21  | 2.599(4)   | C234 C235 | 1.32(2)   |
| Ag32 S40  | 2.454(4)   | C236 C237 | 1.330(18) |
| Ag33 Ag34 | 3.0146(13) | C236 C241 | 1.381(19) |
| Ag33 Ag35 | 3.0004(13) | C237 C238 | 1.33(2)   |
| Ag33 Ag64 | 3.3917(14) | C238 C239 | 1.38(2)   |
| Ag33 S6   | 2.610(3)   | C239 C240 | 1.39(2)   |
| Ag33 S38  | 2.672(3)   | C239 C242 | 1.51(2)   |
| Ag33 S39  | 2.595(3)   | C240 C241 | 1.43(2)   |
| Ag34 Ag35 | 3.0034(13) | C242 C243 | 1.46(3)   |
| Ag34 Ag49 | 3.2288(16) | C242 C244 | 1.62(3)   |
| Ag34 Ag51 | 2.9949(14) | C242 C245 | 1.48(3)   |
| Ag34 S7   | 2.477(3)   | C246 C247 | 1.363(17) |
| Ag34 S11  | 3.098(3)   | C246 C251 | 1.363(17) |
| Ag34 S38  | 2.458(3)   | C247 C248 | 1.377(18) |
| Ag35 Ag36 | 3.3148(13) | C248 C249 | 1.362(18) |
| Ag35 S7   | 2.669(3)   | C249 C250 | 1.366(19) |
| Ag35 S32  | 2.636(3)   | C249 C252 | 1.50(2)   |
| Ag35 S39  | 2.592(3)   | C250 C251 | 1.410(19) |
| Ag36 Ag37 | 3.0497(13) | C252 C253 | 1.62(2)   |
| Ag36 Ag69 | 3.2711(14) | C252 C254 | 1.47(2)   |
| Ag36 S7   | 2.697(3)   | C252 C255 | 1.54(3)   |
| Ag36 S32  | 2.638(3)   | C256 C257 | 1.427(17) |
| Ag36 S34  | 2.570(3)   | C256 C261 | 1.367(19) |
| Ag37 Ag38 | 3.2860(13) | C257 C258 | 1.43(2)   |
| Ag37 Ag67 | 3.4221(16) | C258 C259 | 1.41(2)   |
| Ag37 S8   | 2.590(3)   | C259 C260 | 1.34(2)   |
| Ag37 S34  | 2.570(3)   | C259 C262 | 1.51(2)   |
| Ag37 S37  | 2.656(3)   | C260 C261 | 1.38(2)   |
| Ag38 Ag39 | 2.8731(12) | C262 C263 | 1.53(3)   |

|           |            |           |           |
|-----------|------------|-----------|-----------|
| Ag38 Ag42 | 2.9200(11) | C262 C264 | 1.55(3)   |
| Ag38 Ag52 | 2.9935(14) | C262 C265 | 1.45(3)   |
| Ag38 Ag66 | 3.4549(16) | C266 C267 | 1.374(16) |
| Ag38 S8   | 2.606(3)   | C266 C271 | 1.391(18) |
| Ag38 S13  | 2.608(3)   | C267 C268 | 1.405(18) |
| Ag38 S37  | 2.651(3)   | C268 C269 | 1.401(19) |
| Ag39 Ag40 | 2.9394(12) | C269 C270 | 1.397(19) |
| Ag39 Ag41 | 2.9203(12) | C269 C272 | 1.50(2)   |
| Ag39 Ag42 | 2.7717(10) | C270 C271 | 1.37(2)   |
| Ag39 Ag52 | 2.9907(13) | C272 C273 | 1.55(2)   |
| Ag40 Ag41 | 2.9005(11) | C272 C274 | 1.46(2)   |
| Ag40 Ag46 | 2.7976(10) | C272 C275 | 1.53(2)   |
| Ag40 Ag47 | 2.8754(12) | C276 C277 | 1.3900    |
| Ag40 Ag55 | 2.9682(12) | C276 C281 | 1.3900    |
| Ag41 Ag42 | 2.8034(11) | C277 C278 | 1.3900    |
| Ag41 Ag43 | 3.4398(15) | C278 C279 | 1.3900    |
| Ag41 Ag45 | 3.2662(14) | C279 C280 | 1.3900    |
| Ag41 Ag46 | 2.7907(11) | C279 C282 | 1.561(15) |
| Ag41 Ag52 | 3.4784(15) | C280 C281 | 1.3900    |
| Ag41 Ag54 | 3.0872(12) | C282 C283 | 1.490(17) |
| Ag41 Ag55 | 3.6454(14) | C282 C284 | 1.552(17) |
| Ag42 Ag43 | 3.1021(14) | C282 C505 | 1.544(17) |
| Ag42 Ag52 | 3.3815(13) | C285 C286 | 1.33(2)   |
| Ag42 Ag53 | 2.9160(11) | C285 C290 | 1.37(2)   |
| Ag42 Ag54 | 3.0364(12) | C286 C287 | 1.44(2)   |
| Ag42 Ag66 | 3.4610(16) | C287 C288 | 1.43(2)   |
| Ag43 Ag54 | 3.2065(14) | C288 C289 | 1.31(2)   |
| Ag43 S9   | 2.538(4)   | C289 C290 | 1.41(2)   |
| Ag43 S27  | 2.622(3)   | C291 C292 | 1.40(2)   |
| Ag43 S29  | 2.494(4)   | C291 C296 | 1.43(2)   |
| Ag44 Ag45 | 2.9814(17) | C292 C293 | 1.35(2)   |
| Ag44 Ag46 | 3.376(2)   | C293 C294 | 1.33(2)   |
| Ag44 Ag58 | 3.466(2)   | C294 C295 | 1.36(3)   |
| Ag44 S9   | 2.689(4)   | C295 C296 | 1.38(3)   |
| Ag44 S18  | 2.404(3)   | C297 C298 | 1.3900    |
| Ag44 S27  | 2.527(3)   | C297 C302 | 1.3900    |
| Ag45 Ag46 | 3.0489(13) | C298 C299 | 1.3900    |
| Ag45 Ag54 | 3.3543(15) | C299 C300 | 1.3900    |
| Ag45 Ag56 | 2.9853(15) | C300 C301 | 1.3900    |
| Ag45 S14  | 2.534(3)   | C301 C302 | 1.3900    |

|           |            |           |           |
|-----------|------------|-----------|-----------|
| Ag45 S19  | 2.504(4)   | C303 C304 | 1.36(2)   |
| Ag45 S27  | 2.722(3)   | C303 C308 | 1.37(2)   |
| Ag46 Ag47 | 2.9019(10) | C304 C305 | 1.40(2)   |
| Ag46 Ag55 | 3.3624(13) | C305 C306 | 1.45(2)   |
| Ag46 Ag56 | 2.9832(12) | C306 C307 | 1.36(2)   |
| Ag46 Ag57 | 3.5868(14) | C306 C490 | 1.531(17) |
| Ag46 Ag58 | 2.9838(11) | C307 C308 | 1.40(2)   |
| Ag47 Ag48 | 3.0567(12) | C309 C310 | 1.393(18) |
| Ag47 Ag55 | 2.9167(13) | C309 C314 | 1.36(2)   |
| Ag47 Ag57 | 3.2143(15) | C310 C311 | 1.38(2)   |
| Ag47 S10  | 2.689(3)   | C311 C312 | 1.34(2)   |
| Ag47 S15  | 2.651(3)   | C312 C313 | 1.40(2)   |
| Ag47 S26  | 2.583(3)   | C312 C315 | 1.515(15) |
| Ag48 Ag49 | 3.1820(16) | C313 C314 | 1.39(2)   |
| Ag48 Ag60 | 3.6192(17) | C315 C316 | 1.540(16) |
| Ag48 Ag64 | 3.1898(13) | C315 C317 | 1.516(16) |
| Ag48 S10  | 2.659(3)   | C315 C318 | 1.493(16) |
| Ag48 S23  | 2.550(3)   | C320 C321 | 1.38(2)   |
| Ag48 S26  | 2.660(3)   | C320 C325 | 1.45(2)   |
| Ag49 Ag50 | 3.2490(17) | C321 C322 | 1.44(2)   |
| Ag49 Ag64 | 3.4909(16) | C322 C323 | 1.49(2)   |
| Ag49 S10  | 2.419(3)   | C323 C324 | 1.32(2)   |
| Ag49 S38  | 2.404(3)   | C323 C326 | 1.57(3)   |
| Ag50 Ag51 | 3.0558(17) | C324 C325 | 1.41(2)   |
| Ag50 S10  | 2.995(3)   | C326 C327 | 1.66(3)   |
| Ag50 S11  | 2.450(4)   | C326 C328 | 1.52(3)   |
| Ag50 S12  | 2.429(3)   | C326 C329 | 1.32(3)   |
| Ag51 S7   | 2.665(3)   | C330 C331 | 1.364(17) |
| Ag51 S8   | 2.481(3)   | C330 C335 | 1.374(17) |
| Ag51 S11  | 2.579(4)   | C331 C332 | 1.388(19) |
| Ag52 Ag54 | 3.4793(17) | C332 C333 | 1.366(19) |
| Ag52 Ag55 | 3.4404(16) | C333 C334 | 1.34(2)   |
| Ag52 S12  | 2.491(3)   | C333 C336 | 1.59(2)   |
| Ag52 S13  | 2.476(3)   | C334 C335 | 1.39(2)   |
| Ag52 S14  | 2.767(4)   | C336 C337 | 1.64(3)   |
| Ag53 Ag54 | 2.9287(14) | C336 C338 | 1.41(3)   |
| Ag53 Ag65 | 3.0441(13) | C336 C339 | 1.53(3)   |
| Ag53 Ag66 | 2.9499(15) | C340 C341 | 1.30(2)   |
| Ag53 S13  | 2.640(3)   | C340 C345 | 1.33(3)   |
| Ag53 S28  | 2.628(3)   | C341 C342 | 1.48(3)   |

|           |            |           |           |
|-----------|------------|-----------|-----------|
| Ag53 S30  | 2.607(4)   | C342 C343 | 1.23(3)   |
| Ag54 S14  | 2.523(3)   | C343 C344 | 1.41(3)   |
| Ag54 S27  | 2.698(3)   | C343 C346 | 1.579(18) |
| Ag54 S28  | 2.505(3)   | C344 C345 | 1.37(3)   |
| Ag55 S12  | 2.506(3)   | C346 C347 | 1.521(17) |
| Ag55 S14  | 2.688(3)   | C346 C348 | 1.565(17) |
| Ag55 S15  | 2.481(3)   | C346 C501 | 1.548(17) |
| Ag56 Ag57 | 2.9239(14) | C350 C351 | 1.407(17) |
| Ag56 Ag59 | 3.2241(13) | C350 C355 | 1.417(18) |
| Ag56 S15  | 2.568(3)   | C351 C352 | 1.414(18) |
| Ag56 S19  | 2.568(3)   | C352 C353 | 1.388(19) |
| Ag56 S20  | 2.649(4)   | C353 C354 | 1.42(2)   |
| Ag57 Ag58 | 3.6482(15) | C353 C356 | 1.52(2)   |
| Ag57 Ag60 | 3.4774(16) | C354 C355 | 1.428(19) |
| Ag57 S16  | 2.630(3)   | C356 C357 | 1.41(3)   |
| Ag57 S20  | 2.444(3)   | C356 C358 | 1.61(2)   |
| Ag57 S26  | 2.502(3)   | C356 C359 | 1.48(3)   |
| Ag58 S16  | 2.648(3)   | C360 C361 | 1.312(19) |
| Ag58 S17  | 2.696(3)   | C360 C365 | 1.39(2)   |
| Ag58 S18  | 2.559(3)   | C361 C362 | 1.40(2)   |
| Ag59 S18  | 2.604(3)   | C362 C363 | 1.37(2)   |
| Ag59 S19  | 2.727(3)   | C363 C364 | 1.31(2)   |
| Ag59 S20  | 2.587(3)   | C363 C366 | 1.542(16) |
| Ag59 P1   | 2.426(3)   | C364 C365 | 1.41(3)   |
| Ag60 Ag61 | 2.8760(18) | C366 C367 | 1.500(16) |
| Ag60 S16  | 2.456(3)   | C366 C368 | 1.537(16) |
| Ag60 S24  | 2.440(4)   | C366 C369 | 1.544(16) |
| Ag60 S26  | 2.785(3)   | C370 C371 | 1.34(2)   |
| Ag61 Ag62 | 2.9612(18) | C370 C375 | 1.31(3)   |
| Ag61 Ag63 | 3.0894(13) | C371 C372 | 1.49(3)   |
| Ag61 S22  | 2.638(4)   | C372 C373 | 1.25(3)   |
| Ag61 S24  | 2.650(4)   | C373 C374 | 1.44(3)   |
| Ag61 S25  | 2.593(3)   | C373 C376 | 1.556(17) |
| Ag62 Ag64 | 3.3090(16) | C374 C375 | 1.53(3)   |
| Ag62 S6   | 2.808(3)   | C376 C377 | 1.543(17) |
| Ag62 S21  | 2.449(4)   | C376 C378 | 1.562(17) |
| Ag62 S22  | 2.423(4)   | C376 C379 | 1.561(17) |
| Ag63 S22  | 2.685(3)   | C380 C381 | 1.41(2)   |
| Ag63 S23  | 2.575(3)   | C380 C385 | 1.38(2)   |
| Ag63 S24  | 2.625(4)   | C381 C382 | 1.37(3)   |

|           |            |           |           |
|-----------|------------|-----------|-----------|
| Ag63 P2   | 2.425(3)   | C382 C383 | 1.29(3)   |
| Ag64 S6   | 2.527(3)   | C383 C384 | 1.43(3)   |
| Ag64 S23  | 2.571(3)   | C383 C386 | 1.50(2)   |
| Ag64 S38  | 3.036(3)   | C384 C385 | 1.37(3)   |
| Ag65 S28  | 2.585(3)   | C386 C387 | 1.46(3)   |
| Ag65 S29  | 2.605(3)   | C386 C388 | 1.57(3)   |
| Ag65 S30  | 2.813(4)   | C386 C389 | 1.58(3)   |
| Ag65 P4   | 2.428(3)   | C390 C391 | 1.409(19) |
| Ag66 Ag67 | 3.4746(16) | C390 C395 | 1.365(18) |
| Ag66 S30  | 2.440(4)   | C391 C392 | 1.42(2)   |
| Ag66 S31  | 2.592(3)   | C392 C393 | 1.25(2)   |
| Ag66 S37  | 2.561(3)   | C393 C394 | 1.41(2)   |
| Ag67 Ag68 | 3.0269(16) | C393 C396 | 1.54(2)   |
| Ag67 S31  | 2.527(3)   | C394 C395 | 1.34(2)   |
| Ag67 S35  | 2.410(4)   | C396 C397 | 1.39(3)   |
| Ag67 S37  | 2.596(3)   | C396 C398 | 1.58(4)   |
| Ag68 Ag69 | 3.0077(15) | C396 C399 | 1.54(3)   |
| Ag68 Ag70 | 3.1138(12) | C400 C6AA | 1.3900    |
| Ag68 S33  | 2.644(4)   | C400 C408 | 1.3900    |
| Ag68 S35  | 2.603(4)   | C6AA C7AA | 1.3900    |
| Ag68 S36  | 2.544(3)   | C7AA C403 | 1.3900    |
| Ag69 S5   | 2.502(3)   | C403 C407 | 1.3900    |
| Ag69 S32  | 2.699(3)   | C403 C404 | 1.62(3)   |
| Ag69 S33  | 2.442(3)   | C407 C408 | 1.3900    |
| Ag70 S33  | 2.589(3)   | C404 C405 | 1.47(3)   |
| Ag70 S34  | 2.629(3)   | C404 C406 | 1.41(3)   |
| Ag70 S35  | 2.663(3)   | C404 C491 | 1.58(3)   |
| Ag70 P3   | 2.416(3)   | C409 C410 | 1.3900    |
| Ag71 S40  | 2.698(4)   | C409 C414 | 1.3900    |
| Ag71 S41  | 2.567(4)   | C410 C411 | 1.3900    |
| Ag71 S42  | 2.612(4)   | C411 C412 | 1.3900    |
| Ag71 P5   | 2.438(4)   | C412 C413 | 1.3900    |
| S1 C1     | 1.759(13)  | C412 C415 | 1.533(16) |
| S2 C468   | 1.794(11)  | C413 C414 | 1.3900    |
| S3 C466   | 1.761(9)   | C415 C416 | 1.493(17) |
| S4 C456   | 1.780(12)  | C415 C417 | 1.538(17) |
| S5 C446   | 1.785(11)  | C415 C494 | 1.514(17) |
| S6 C390   | 1.797(13)  | C418 C420 | 1.3900    |
| S7 C370   | 1.797(13)  | C418 C422 | 1.3900    |
| S8 C360   | 1.807(12)  | C420 C421 | 1.3900    |

|     |      |           |      |      |           |
|-----|------|-----------|------|------|-----------|
| S9  | C350 | 1.753(12) | C421 | C5AA | 1.3900    |
| S10 | C330 | 1.801(11) | C5AA | C423 | 1.3900    |
| S11 | C11  | 1.785(9)  | C423 | C422 | 1.3900    |
| S12 | C320 | 1.754(12) | C424 | C429 | 1.3900    |
| S13 | C309 | 1.807(11) | C424 | C425 | 1.3900    |
| S14 | C168 | 1.779(11) | C429 | C428 | 1.3900    |
| S15 | C158 | 1.794(7)  | C428 | C427 | 1.3900    |
| S16 | C149 | 1.800(13) | C427 | C426 | 1.3900    |
| S17 | C22  | 1.812(13) | C426 | C425 | 1.3900    |
| S18 | C67  | 1.772(11) | C430 | C435 | 1.3900    |
| S19 | C30  | 1.785(14) | C430 | C431 | 1.3900    |
| S20 | C39  | 1.766(14) | C435 | C434 | 1.3900    |
| S21 | C77  | 1.786(9)  | C434 | C433 | 1.3900    |
| S22 | C119 | 1.792(14) | C433 | C432 | 1.3900    |
| S23 | C87  | 1.764(11) | C432 | C431 | 1.3900    |
| S24 | C97  | 1.820(7)  | C436 | C437 | 1.3900    |
| S25 | C129 | 1.784(13) | C436 | C441 | 1.3900    |
| S26 | C139 | 1.737(12) | C437 | C438 | 1.3900    |
| S27 | C176 | 1.788(14) | C438 | C439 | 1.3900    |
| S28 | C303 | 1.781(14) | C439 | C440 | 1.3900    |
| S29 | C186 | 1.778(14) | C439 | C442 | 1.61(3)   |
| S30 | C276 | 1.787(10) | C440 | C441 | 1.3900    |
| S31 | C266 | 1.748(12) | C442 | C443 | 1.51(3)   |
| S32 | C192 | 1.802(13) | C442 | C444 | 1.55(3)   |
| S33 | C236 | 1.799(13) | C442 | C445 | 1.47(3)   |
| S34 | C202 | 1.774(7)  | C446 | C447 | 1.373(17) |
| S35 | C208 | 1.755(13) | C446 | C451 | 1.392(18) |
| S36 | C246 | 1.792(11) | C447 | C448 | 1.38(2)   |
| S37 | C256 | 1.796(12) | C448 | C449 | 1.40(2)   |
| S38 | C340 | 1.782(13) | C449 | C450 | 1.42(2)   |
| S39 | C380 | 1.773(13) | C449 | C452 | 1.55(2)   |
| S40 | C436 | 1.741(9)  | C450 | C451 | 1.35(2)   |
| S41 | C400 | 1.799(9)  | C452 | C453 | 1.49(3)   |
| S42 | C409 | 1.790(10) | C452 | C454 | 1.49(3)   |
| P1  | C49  | 1.816(15) | C452 | C455 | 1.41(2)   |
| P1  | C55  | 1.788(17) | C456 | C457 | 1.348(19) |
| P1  | C61  | 1.818(16) | C456 | C461 | 1.44(2)   |
| P2  | C107 | 1.817(9)  | C457 | C458 | 1.40(2)   |
| P2  | C113 | 1.888(10) | C458 | C459 | 1.42(2)   |
| P2  | C8AA | 1.812(10) | C459 | C460 | 1.41(2)   |

|     |      |           |      |      |           |
|-----|------|-----------|------|------|-----------|
| P3  | C218 | 1.849(14) | C459 | C462 | 1.57(2)   |
| P3  | C224 | 1.810(8)  | C460 | C461 | 1.34(2)   |
| P3  | C230 | 1.851(14) | C462 | C463 | 1.47(2)   |
| P4  | C285 | 1.812(15) | C462 | C464 | 1.59(3)   |
| P4  | C291 | 1.779(15) | C462 | C465 | 1.52(2)   |
| P4  | C297 | 1.818(10) | C466 | C1BA | 1.3900    |
| P5  | C418 | 1.814(12) | C466 | C2BA | 1.3900    |
| P5  | C424 | 1.803(11) | C1BA | C489 | 1.3900    |
| P5  | C430 | 1.765(12) | C489 | C488 | 1.3900    |
| C1  | C2   | 1.19(2)   | C488 | C467 | 1.3900    |
| C1  | C6   | 1.35(3)   | C488 | C503 | 1.539(12) |
| C2  | C3   | 1.48(3)   | C467 | C2BA | 1.3900    |
| C3  | C4   | 1.43(3)   | C468 | C469 | 1.332(17) |
| C4  | C5   | 1.21(2)   | C468 | C473 | 1.405(18) |
| C4  | C7   | 1.491(15) | C469 | C470 | 1.346(19) |
| C5  | C6   | 1.44(3)   | C470 | C471 | 1.418(19) |
| C7  | C8   | 1.457(16) | C471 | C472 | 1.29(2)   |
| C7  | C9   | 1.505(13) | C471 | C474 | 1.50(2)   |
| C7  | C10  | 1.456(16) | C472 | C473 | 1.40(2)   |
| C11 | C12  | 1.3900    | C474 | C475 | 1.57(3)   |
| C11 | C16  | 1.3900    | C474 | C476 | 1.57(3)   |
| C12 | C13  | 1.3900    | C474 | C477 | 1.34(2)   |
| C13 | C14  | 1.3900    | C485 | C486 | 1.490(12) |
| C14 | C15  | 1.3900    | C485 | C487 | 1.513(12) |
| C14 | C17  | 1.49(3)   | C485 | C498 | 1.553(13) |
| C15 | C16  | 1.3900    | C490 | C507 | 1.502(17) |
| C17 | C18  | 1.48(3)   | C490 | C2AA | 1.524(17) |
| C17 | C19  | 1.56(3)   | C490 | C1AA | 1.502(17) |
| C17 | C496 | 1.56(3)   | C492 | C0AA | 1.500(17) |
| C22 | C23  | 1.366(19) | C499 | C0AA | 1.548(18) |
| C22 | C27  | 1.44(2)   | C503 | C504 | 1.507(13) |
| C23 | C24  | 1.38(2)   | C503 | C0BA | 1.562(13) |
| C24 | C25  | 1.33(2)   | C503 | C3BA | 1.501(13) |
| C25 | C26  | 1.36(2)   | C506 | C0AA | 1.498(16) |
| C25 | C28  | 1.557(13) | C8AA | C500 | 1.3900    |
| C26 | C27  | 1.34(2)   | C8AA | C732 | 1.3900    |
| C28 | C29  | 1.534(13) | C500 | C9AA | 1.3900    |
| C28 | C495 | 1.543(13) | C9AA | C651 | 1.3900    |
| C28 | C4BA | 1.537(13) | C651 | C667 | 1.3900    |
| C30 | C31  | 1.35(2)   | C667 | C732 | 1.3900    |

C30 C35 1.39(2)

**Table S6. Bond Angles for Ag<sub>70</sub>-TPP.**

| Atom | Atom | Atom | Angle/°   | Atom | Atom | Atom | Angle/°    |
|------|------|------|-----------|------|------|------|------------|
| Ag2  | Ag1  | Ag8  | 68.97(3)  | S9   | Ag44 | Ag45 | 116.56(9)  |
| Ag2  | Ag1  | Ag9  | 64.05(3)  | S9   | Ag44 | Ag46 | 90.28(10)  |
| Ag2  | Ag1  | Ag14 | 123.08(4) | S9   | Ag44 | Ag58 | 84.52(10)  |
| Ag2  | Ag1  | Ag15 | 134.97(4) | S18  | Ag44 | Ag45 | 107.39(8)  |
| Ag2  | Ag1  | Ag16 | 142.57(4) | S18  | Ag44 | Ag46 | 83.31(8)   |
| Ag2  | Ag1  | Ag17 | 148.1(4)  | S18  | Ag44 | Ag58 | 47.56(8)   |
| Ag2  | Ag1  | Ag19 | 65.89(3)  | S18  | Ag44 | S9   | 121.93(13) |
| Ag2  | Ag1  | Ag20 | 65.08(3)  | S18  | Ag44 | S27  | 153.08(16) |
| Ag2  | Ag1  | Ag21 | 64.04(3)  | S27  | Ag44 | Ag45 | 58.54(8)   |
| Ag8  | Ag1  | Ag9  | 64.86(3)  | S27  | Ag44 | Ag46 | 103.16(9)  |
| Ag8  | Ag1  | Ag14 | 87.80(4)  | S27  | Ag44 | Ag58 | 152.40(11) |
| Ag8  | Ag1  | Ag15 | 66.28(3)  | S27  | Ag44 | S9   | 84.49(11)  |
| Ag8  | Ag1  | Ag16 | 120.17(4) | Ag41 | Ag45 | Ag54 | 55.57(3)   |
| Ag8  | Ag1  | Ag17 | 118.8(5)  | Ag44 | Ag45 | Ag41 | 74.96(6)   |
| Ag8  | Ag1  | Ag19 | 122.96(3) | Ag44 | Ag45 | Ag46 | 68.08(5)   |
| Ag8  | Ag1  | Ag20 | 123.12(3) | Ag44 | Ag45 | Ag54 | 96.13(5)   |
| Ag8  | Ag1  | Ag21 | 65.16(3)  | Ag44 | Ag45 | Ag56 | 91.32(4)   |
| Ag9  | Ag1  | Ag14 | 59.04(3)  | Ag46 | Ag45 | Ag41 | 52.31(3)   |
| Ag9  | Ag1  | Ag15 | 100.20(3) | Ag46 | Ag45 | Ag54 | 107.85(4)  |
| Ag9  | Ag1  | Ag16 | 153.21(4) | Ag56 | Ag45 | Ag41 | 110.47(4)  |
| Ag9  | Ag1  | Ag17 | 90.3(4)   | Ag56 | Ag45 | Ag46 | 59.25(3)   |
| Ag9  | Ag1  | Ag19 | 65.04(3)  | Ag56 | Ag45 | Ag54 | 161.20(5)  |
| Ag9  | Ag1  | Ag20 | 117.89(3) | S14  | Ag45 | Ag41 | 64.84(7)   |
| Ag9  | Ag1  | Ag21 | 117.08(3) | S14  | Ag45 | Ag44 | 136.84(9)  |
| Ag14 | Ag1  | Ag15 | 60.19(3)  | S14  | Ag45 | Ag46 | 97.13(8)   |
| Ag16 | Ag1  | Ag14 | 94.23(4)  | S14  | Ag45 | Ag54 | 48.31(7)   |
| Ag16 | Ag1  | Ag15 | 63.70(4)  | S14  | Ag45 | Ag56 | 116.37(8)  |
| Ag16 | Ag1  | Ag17 | 63.8(4)   | S14  | Ag45 | S27  | 99.74(10)  |
| Ag17 | Ag1  | Ag15 | 64.7(5)   | S19  | Ag45 | Ag41 | 155.87(9)  |
| Ag19 | Ag1  | Ag14 | 88.94(3)  | S19  | Ag45 | Ag44 | 85.62(9)   |
| Ag19 | Ag1  | Ag15 | 148.45(4) | S19  | Ag45 | Ag46 | 107.26(9)  |
| Ag19 | Ag1  | Ag16 | 116.86(4) | S19  | Ag45 | Ag54 | 142.73(9)  |
| Ag19 | Ag1  | Ag17 | 86.7(4)   | S19  | Ag45 | Ag56 | 54.94(8)   |
| Ag19 | Ag1  | Ag20 | 63.22(3)  | S19  | Ag45 | S14  | 137.10(11) |
| Ag20 | Ag1  | Ag14 | 145.92(4) | S19  | Ag45 | S27  | 105.63(11) |
| Ag20 | Ag1  | Ag15 | 141.37(4) | S27  | Ag45 | Ag41 | 73.75(7)   |



|      |     |      |           |      |      |      |           |
|------|-----|------|-----------|------|------|------|-----------|
| Ag20 | Ag1 | Ag16 | 82.64(3)  | S27  | Ag45 | Ag44 | 52.36(7)  |
| Ag20 | Ag1 | Ag17 | 118.0(6)  | S27  | Ag45 | Ag46 | 107.39(7) |
| Ag21 | Ag1 | Ag14 | 148.30(4) | S27  | Ag45 | Ag54 | 51.44(7)  |
| Ag21 | Ag1 | Ag15 | 92.41(3)  | S27  | Ag45 | Ag56 | 142.11(8) |
| Ag21 | Ag1 | Ag16 | 86.22(4)  | Ag20 | Ag46 | Ag44 | 73.23(5)  |
| Ag21 | Ag1 | Ag17 | 147.8(4)  | Ag20 | Ag46 | Ag45 | 116.50(3) |
| Ag21 | Ag1 | Ag19 | 119.08(3) | Ag20 | Ag46 | Ag47 | 122.81(3) |
| Ag21 | Ag1 | Ag20 | 65.63(3)  | Ag20 | Ag46 | Ag55 | 127.89(3) |
| Ag1  | Ag2 | Ag3  | 169.71(4) | Ag20 | Ag46 | Ag56 | 151.36(3) |
| Ag1  | Ag2 | Ag4  | 114.07(3) | Ag20 | Ag46 | Ag57 | 119.35(3) |
| Ag1  | Ag2 | Ag8  | 55.55(2)  | Ag20 | Ag46 | Ag58 | 59.54(3)  |
| Ag1  | Ag2 | Ag9  | 58.32(2)  | Ag22 | Ag46 | Ag20 | 64.21(3)  |
| Ag1  | Ag2 | Ag10 | 117.75(3) | Ag22 | Ag46 | Ag40 | 64.14(3)  |
| Ag1  | Ag2 | Ag19 | 57.99(2)  | Ag22 | Ag46 | Ag41 | 112.13(3) |
| Ag1  | Ag2 | Ag20 | 58.55(2)  | Ag22 | Ag46 | Ag44 | 125.99(4) |
| Ag1  | Ag2 | Ag21 | 58.52(2)  | Ag22 | Ag46 | Ag45 | 178.99(4) |
| Ag1  | Ag2 | Ag23 | 123.21(3) | Ag22 | Ag46 | Ag47 | 63.48(3)  |
| Ag1  | Ag2 | Ag39 | 126.55(4) | Ag22 | Ag46 | Ag55 | 108.64(3) |
| Ag1  | Ag2 | Ag40 | 131.28(4) | Ag22 | Ag46 | Ag56 | 120.47(4) |
| Ag3  | Ag2 | Ag4  | 56.24(2)  | Ag22 | Ag46 | Ag57 | 69.15(3)  |
| Ag3  | Ag2 | Ag8  | 114.81(3) | Ag22 | Ag46 | Ag58 | 64.71(3)  |
| Ag3  | Ag2 | Ag9  | 114.74(3) | Ag40 | Ag46 | Ag20 | 77.10(3)  |
| Ag3  | Ag2 | Ag10 | 55.17(2)  | Ag40 | Ag46 | Ag44 | 135.84(4) |
| Ag3  | Ag2 | Ag19 | 127.08(3) | Ag40 | Ag46 | Ag45 | 115.18(3) |
| Ag3  | Ag2 | Ag20 | 131.45(3) | Ag40 | Ag46 | Ag47 | 60.56(3)  |
| Ag3  | Ag2 | Ag21 | 121.53(3) | Ag40 | Ag46 | Ag55 | 56.73(3)  |
| Ag3  | Ag2 | Ag23 | 56.67(2)  | Ag40 | Ag46 | Ag56 | 131.35(3) |
| Ag3  | Ag2 | Ag39 | 58.12(2)  | Ag40 | Ag46 | Ag57 | 114.26(3) |
| Ag3  | Ag2 | Ag40 | 58.72(2)  | Ag40 | Ag46 | Ag58 | 123.19(3) |
| Ag4  | Ag2 | Ag8  | 58.58(2)  | Ag41 | Ag46 | Ag20 | 65.62(3)  |
| Ag4  | Ag2 | Ag10 | 56.30(2)  | Ag41 | Ag46 | Ag40 | 62.53(3)  |
| Ag8  | Ag2 | Ag10 | 88.11(3)  | Ag41 | Ag46 | Ag44 | 75.61(4)  |
| Ag9  | Ag2 | Ag4  | 85.96(3)  | Ag41 | Ag46 | Ag45 | 67.85(3)  |
| Ag9  | Ag2 | Ag8  | 58.61(2)  | Ag41 | Ag46 | Ag47 | 116.63(3) |
| Ag9  | Ag2 | Ag10 | 59.65(2)  | Ag41 | Ag46 | Ag55 | 71.98(3)  |
| Ag9  | Ag2 | Ag19 | 60.52(3)  | Ag41 | Ag46 | Ag56 | 125.68(3) |
| Ag9  | Ag2 | Ag20 | 107.85(3) | Ag41 | Ag46 | Ag57 | 173.99(3) |
| Ag9  | Ag2 | Ag21 | 107.84(3) | Ag41 | Ag46 | Ag58 | 119.25(3) |
| Ag9  | Ag2 | Ag23 | 142.88(4) | Ag44 | Ag46 | Ag57 | 108.63(4) |
| Ag19 | Ag2 | Ag4  | 145.11(4) | Ag45 | Ag46 | Ag44 | 55.01(4)  |

|                         |                          |
|-------------------------|--------------------------|
| Ag19 Ag2 Ag8 105.49(3)  | Ag45 Ag46 Ag55 70.37(3)  |
| Ag19 Ag2 Ag10 95.30(3)  | Ag45 Ag46 Ag57 110.76(3) |
| Ag20 Ag2 Ag4 151.17(4)  | Ag47 Ag46 Ag44 162.21(5) |
| Ag20 Ag2 Ag8 106.53(3)  | Ag47 Ag46 Ag45 115.58(3) |
| Ag20 Ag2 Ag10 152.43(4) | Ag47 Ag46 Ag55 54.91(3)  |
| Ag20 Ag2 Ag19 58.68(3)  | Ag47 Ag46 Ag56 78.27(3)  |
| Ag21 Ag2 Ag4 90.38(3)   | Ag47 Ag46 Ag57 58.25(3)  |
| Ag21 Ag2 Ag8 58.95(3)   | Ag47 Ag46 Ag58 113.77(3) |
| Ag21 Ag2 Ag10 143.33(4) | Ag55 Ag46 Ag44 123.67(4) |
| Ag21 Ag2 Ag19 108.00(3) | Ag55 Ag46 Ag57 102.01(3) |
| Ag21 Ag2 Ag20 61.57(3)  | Ag56 Ag46 Ag44 84.06(5)  |
| Ag21 Ag2 Ag23 65.07(3)  | Ag56 Ag46 Ag45 59.31(3)  |
| Ag23 Ag2 Ag4 58.71(3)   | Ag56 Ag46 Ag55 79.28(3)  |
| Ag23 Ag2 Ag8 90.62(3)   | Ag56 Ag46 Ag57 51.86(3)  |
| Ag23 Ag2 Ag10 102.97(3) | Ag56 Ag46 Ag58 95.50(3)  |
| Ag23 Ag2 Ag19 156.05(4) | Ag58 Ag46 Ag44 65.71(3)  |
| Ag23 Ag2 Ag20 100.15(3) | Ag58 Ag46 Ag45 116.23(3) |
| Ag39 Ag2 Ag4 104.65(3)  | Ag58 Ag46 Ag55 168.14(4) |
| Ag39 Ag2 Ag8 143.97(4)  | Ag58 Ag46 Ag57 66.72(3)  |
| Ag39 Ag2 Ag9 90.77(3)   | Ag22 Ag47 Ag48 67.05(3)  |
| Ag39 Ag2 Ag10 58.15(3)  | Ag22 Ag47 Ag57 72.48(3)  |
| Ag39 Ag2 Ag19 69.05(3)  | Ag40 Ag47 Ag22 60.56(3)  |
| Ag39 Ag2 Ag20 100.43(3) | Ag40 Ag47 Ag46 57.92(3)  |
| Ag39 Ag2 Ag21 157.00(4) | Ag40 Ag47 Ag48 91.05(3)  |
| Ag39 Ag2 Ag23 107.84(3) | Ag40 Ag47 Ag55 61.65(3)  |
| Ag40 Ag2 Ag4 107.73(3)  | Ag40 Ag47 Ag57 124.01(4) |
| Ag40 Ag2 Ag8 150.86(4)  | Ag46 Ag47 Ag22 56.15(2)  |
| Ag40 Ag2 Ag9 150.34(4)  | Ag46 Ag47 Ag48 122.95(3) |
| Ag40 Ag2 Ag10 105.64(3) | Ag46 Ag47 Ag55 70.60(3)  |
| Ag40 Ag2 Ag19 98.79(3)  | Ag46 Ag47 Ag57 71.60(3)  |
| Ag40 Ag2 Ag20 72.74(3)  | Ag48 Ag47 Ag57 97.53(4)  |
| Ag40 Ag2 Ag21 98.47(3)  | Ag55 Ag47 Ag22 115.57(4) |
| Ag40 Ag2 Ag23 61.58(3)  | Ag55 Ag47 Ag48 138.34(5) |
| Ag40 Ag2 Ag39 60.67(3)  | Ag55 Ag47 Ag57 123.51(4) |
| Ag2 Ag3 Ag34 124.20(3)  | S10 Ag47 Ag22 103.58(6)  |
| Ag2 Ag3 Ag49 123.14(3)  | S10 Ag47 Ag40 74.87(7)   |
| Ag2 Ag3 Ag50 143.41(4)  | S10 Ag47 Ag46 132.75(7)  |
| Ag2 Ag3 Ag51 141.04(4)  | S10 Ag47 Ag48 54.69(6)   |
| Ag4 Ag3 Ag2 66.23(3)    | S10 Ag47 Ag55 86.46(7)   |
| Ag4 Ag3 Ag10 63.83(3)   | S10 Ag47 Ag57 148.97(7)  |

|               |           |                |            |
|---------------|-----------|----------------|------------|
| Ag4 Ag3 Ag34  | 57.99(2)  | S15 Ag47 Ag22  | 137.96(7)  |
| Ag4 Ag3 Ag39  | 116.49(3) | S15 Ag47 Ag40  | 111.87(8)  |
| Ag4 Ag3 Ag40  | 119.27(3) | S15 Ag47 Ag46  | 84.06(7)   |
| Ag4 Ag3 Ag49  | 91.43(3)  | S15 Ag47 Ag48  | 151.96(7)  |
| Ag4 Ag3 Ag50  | 147.94(4) | S15 Ag47 Ag55  | 52.65(7)   |
| Ag4 Ag3 Ag51  | 101.37(4) | S15 Ag47 Ag57  | 83.22(7)   |
| Ag10 Ag3 Ag2  | 69.12(3)  | S15 Ag47 S10   | 114.34(9)  |
| Ag10 Ag3 Ag34 | 87.35(3)  | S26 Ag47 Ag22  | 81.41(6)   |
| Ag10 Ag3 Ag40 | 120.12(3) | S26 Ag47 Ag40  | 137.91(7)  |
| Ag10 Ag3 Ag49 | 146.58(3) | S26 Ag47 Ag46  | 116.10(7)  |
| Ag10 Ag3 Ag50 | 128.16(4) | S26 Ag47 Ag48  | 55.52(7)   |
| Ag10 Ag3 Ag51 | 72.33(3)  | S26 Ag47 Ag55  | 160.41(7)  |
| Ag23 Ag3 Ag2  | 64.98(3)  | S26 Ag47 Ag57  | 49.69(7)   |
| Ag23 Ag3 Ag4  | 64.78(3)  | S26 Ag47 S10   | 99.41(9)   |
| Ag23 Ag3 Ag10 | 120.91(3) | S26 Ag47 S15   | 108.39(10) |
| Ag23 Ag3 Ag34 | 89.15(3)  | Ag22 Ag48 Ag60 | 63.06(3)   |
| Ag23 Ag3 Ag39 | 118.99(3) | Ag23 Ag48 Ag22 | 55.41(3)   |
| Ag23 Ag3 Ag40 | 65.75(3)  | Ag23 Ag48 Ag24 | 53.99(2)   |
| Ag23 Ag3 Ag49 | 58.24(3)  | Ag23 Ag48 Ag47 | 87.64(3)   |
| Ag23 Ag3 Ag50 | 110.86(4) | Ag23 Ag48 Ag49 | 57.44(3)   |
| Ag23 Ag3 Ag51 | 145.51(4) | Ag23 Ag48 Ag60 | 106.16(4)  |
| Ag34 Ag3 Ag49 | 59.72(3)  | Ag23 Ag48 Ag64 | 59.70(3)   |
| Ag39 Ag3 Ag2  | 62.82(3)  | Ag24 Ag48 Ag22 | 51.67(2)   |
| Ag39 Ag3 Ag10 | 64.38(3)  | Ag24 Ag48 Ag47 | 107.10(3)  |
| Ag39 Ag3 Ag34 | 147.16(4) | Ag24 Ag48 Ag49 | 104.09(3)  |
| Ag39 Ag3 Ag40 | 63.49(3)  | Ag24 Ag48 Ag60 | 57.33(3)   |
| Ag39 Ag3 Ag49 | 148.51(3) | Ag24 Ag48 Ag64 | 53.98(3)   |
| Ag39 Ag3 Ag50 | 93.79(3)  | Ag47 Ag48 Ag22 | 55.48(2)   |
| Ag39 Ag3 Ag51 | 95.50(3)  | Ag47 Ag48 Ag49 | 98.48(4)   |
| Ag40 Ag3 Ag2  | 62.31(3)  | Ag47 Ag48 Ag60 | 88.81(4)   |
| Ag40 Ag3 Ag34 | 149.30(4) | Ag47 Ag48 Ag64 | 147.31(4)  |
| Ag40 Ag3 Ag49 | 90.97(3)  | Ag49 Ag48 Ag22 | 107.29(4)  |
| Ag40 Ag3 Ag50 | 82.47(3)  | Ag49 Ag48 Ag60 | 161.41(4)  |
| Ag40 Ag3 Ag51 | 139.08(4) | Ag49 Ag48 Ag64 | 66.44(3)   |
| Ag50 Ag3 Ag34 | 91.02(3)  | Ag64 Ag48 Ag22 | 99.74(3)   |
| Ag50 Ag3 Ag49 | 63.17(3)  | Ag64 Ag48 Ag60 | 98.46(4)   |
| Ag50 Ag3 Ag51 | 63.30(4)  | S10 Ag48 Ag22  | 95.52(6)   |
| Ag51 Ag3 Ag34 | 58.22(3)  | S10 Ag48 Ag23  | 79.72(7)   |
| Ag51 Ag3 Ag49 | 92.65(4)  | S10 Ag48 Ag24  | 132.48(7)  |
| Ag3 Ag4 Ag2   | 57.53(2)  | S10 Ag48 Ag47  | 55.60(7)   |

|               |           |                |            |
|---------------|-----------|----------------|------------|
| Ag3 Ag4 Ag5   | 119.38(3) | S10 Ag48 Ag49  | 47.90(7)   |
| Ag3 Ag4 Ag6   | 176.68(4) | S10 Ag48 Ag60  | 144.05(7)  |
| Ag3 Ag4 Ag7   | 117.00(4) | S10 Ag48 Ag64  | 114.18(8)  |
| Ag3 Ag4 Ag8   | 119.49(3) | S10 Ag48 S26   | 98.23(9)   |
| Ag3 Ag4 Ag10  | 58.47(2)  | S23 Ag48 Ag22  | 137.49(7)  |
| Ag3 Ag4 Ag23  | 57.43(2)  | S23 Ag48 Ag23  | 111.32(8)  |
| Ag3 Ag4 Ag33  | 119.60(3) | S23 Ag48 Ag24  | 86.97(6)   |
| Ag3 Ag4 Ag34  | 68.63(3)  | S23 Ag48 Ag47  | 160.89(8)  |
| Ag3 Ag4 Ag35  | 119.40(3) | S23 Ag48 Ag49  | 90.27(8)   |
| Ag5 Ag4 Ag2   | 91.55(3)  | S23 Ag48 Ag60  | 88.13(8)   |
| Ag5 Ag4 Ag7   | 111.65(3) | S23 Ag48 Ag64  | 51.76(7)   |
| Ag5 Ag4 Ag8   | 59.98(2)  | S23 Ag48 S10   | 123.49(9)  |
| Ag5 Ag4 Ag10  | 61.20(3)  | S23 Ag48 S26   | 112.01(10) |
| Ag5 Ag4 Ag23  | 148.76(3) | S26 Ag48 Ag22  | 73.88(6)   |
| Ag5 Ag4 Ag33  | 112.71(3) | S26 Ag48 Ag23  | 128.49(7)  |
| Ag5 Ag4 Ag34  | 117.54(4) | S26 Ag48 Ag24  | 102.44(6)  |
| Ag5 Ag4 Ag35  | 64.55(3)  | S26 Ag48 Ag47  | 53.17(7)   |
| Ag6 Ag4 Ag2   | 119.41(3) | S26 Ag48 Ag49  | 146.04(7)  |
| Ag6 Ag4 Ag5   | 60.95(3)  | S26 Ag48 Ag60  | 49.83(6)   |
| Ag6 Ag4 Ag7   | 60.68(3)  | S26 Ag48 Ag64  | 147.52(7)  |
| Ag6 Ag4 Ag8   | 57.50(2)  | Ag3 Ag49 Ag64  | 102.75(3)  |
| Ag6 Ag4 Ag10  | 122.11(3) | Ag23 Ag49 Ag3  | 52.24(2)   |
| Ag6 Ag4 Ag23  | 120.35(3) | Ag23 Ag49 Ag34 | 85.36(3)   |
| Ag6 Ag4 Ag33  | 62.06(3)  | Ag23 Ag49 Ag48 | 57.91(3)   |
| Ag6 Ag4 Ag34  | 114.37(4) | Ag23 Ag49 Ag50 | 97.14(4)   |
| Ag6 Ag4 Ag35  | 63.88(3)  | Ag23 Ag49 Ag64 | 56.22(3)   |
| Ag7 Ag4 Ag2   | 88.11(3)  | Ag34 Ag49 Ag3  | 59.28(3)   |
| Ag7 Ag4 Ag8   | 60.40(2)  | Ag34 Ag49 Ag50 | 84.86(4)   |
| Ag7 Ag4 Ag10  | 149.98(4) | Ag34 Ag49 Ag64 | 91.13(3)   |
| Ag7 Ag4 Ag23  | 59.68(3)  | Ag48 Ag49 Ag3  | 101.77(3)  |
| Ag7 Ag4 Ag33  | 64.31(3)  | Ag48 Ag49 Ag34 | 140.10(4)  |
| Ag7 Ag4 Ag34  | 116.61(4) | Ag48 Ag49 Ag50 | 112.54(4)  |
| Ag7 Ag4 Ag35  | 114.29(3) | Ag48 Ag49 Ag64 | 56.89(3)   |
| Ag8 Ag4 Ag2   | 61.97(2)  | Ag50 Ag49 Ag3  | 52.92(3)   |
| Ag10 Ag4 Ag2  | 64.08(3)  | Ag50 Ag49 Ag64 | 153.33(4)  |
| Ag10 Ag4 Ag8  | 94.65(3)  | S10 Ag49 Ag3   | 86.69(7)   |
| Ag10 Ag4 Ag23 | 109.82(3) | S10 Ag49 Ag23  | 83.92(7)   |
| Ag10 Ag4 Ag33 | 145.55(4) | S10 Ag49 Ag34  | 143.15(9)  |
| Ag10 Ag4 Ag35 | 89.73(3)  | S10 Ag49 Ag48  | 54.66(7)   |
| Ag23 Ag4 Ag2  | 59.69(3)  | S10 Ag49 Ag50  | 61.76(8)   |

|               |           |                |            |
|---------------|-----------|----------------|------------|
| Ag23 Ag4 Ag8  | 93.27(3)  | S10 Ag49 Ag64  | 111.39(8)  |
| Ag23 Ag4 Ag33 | 91.15(3)  | S38 Ag49 Ag3   | 102.94(8)  |
| Ag23 Ag4 Ag35 | 146.46(3) | S38 Ag49 Ag23  | 95.22(7)   |
| Ag33 Ag4 Ag2  | 148.10(4) | S38 Ag49 Ag34  | 49.11(8)   |
| Ag33 Ag4 Ag8  | 111.63(3) | S38 Ag49 Ag48  | 114.25(9)  |
| Ag33 Ag4 Ag35 | 60.26(3)  | S38 Ag49 Ag50  | 130.91(10) |
| Ag34 Ag4 Ag2  | 126.13(3) | S38 Ag49 Ag64  | 58.59(8)   |
| Ag34 Ag4 Ag8  | 171.87(4) | S38 Ag49 S10   | 167.18(13) |
| Ag34 Ag4 Ag10 | 90.28(3)  | Ag3 Ag50 Ag49  | 63.91(3)   |
| Ag34 Ag4 Ag23 | 91.12(3)  | Ag3 Ag50 Ag51  | 58.57(3)   |
| Ag34 Ag4 Ag33 | 61.41(3)  | Ag3 Ag50 S10   | 84.13(6)   |
| Ag34 Ag4 Ag35 | 60.87(3)  | Ag51 Ag50 Ag49 | 90.57(4)   |
| Ag35 Ag4 Ag2  | 151.50(4) | S10 Ag50 Ag49  | 45.36(6)   |
| Ag35 Ag4 Ag8  | 112.61(3) | S10 Ag50 Ag51  | 133.44(7)  |
| Ag4 Ag5 Ag8   | 62.05(3)  | S11 Ag50 Ag3   | 90.54(8)   |
| Ag4 Ag5 Ag9   | 89.06(3)  | S11 Ag50 Ag49  | 64.89(9)   |
| Ag4 Ag5 Ag10  | 60.08(3)  | S11 Ag50 Ag51  | 54.54(9)   |
| Ag4 Ag5 Ag28  | 108.10(3) | S11 Ag50 S10   | 104.07(11) |
| Ag4 Ag5 Ag29  | 146.14(4) | S12 Ag50 Ag3   | 105.75(7)  |
| Ag4 Ag5 Ag30  | 109.01(3) | S12 Ag50 Ag49  | 138.39(9)  |
| Ag4 Ag5 Ag35  | 59.28(3)  | S12 Ag50 Ag51  | 119.40(9)  |
| Ag4 Ag5 Ag36  | 94.34(3)  | S12 Ag50 S10   | 95.46(10)  |
| Ag4 Ag5 Ag69  | 151.30(3) | S12 Ag50 S11   | 155.80(12) |
| Ag6 Ag5 Ag4   | 57.30(2)  | Ag3 Ag51 Ag10  | 52.12(2)   |
| Ag6 Ag5 Ag8   | 57.16(3)  | Ag3 Ag51 Ag34  | 65.84(3)   |
| Ag6 Ag5 Ag9   | 117.52(3) | Ag3 Ag51 Ag50  | 58.13(3)   |
| Ag6 Ag5 Ag10  | 117.35(3) | Ag34 Ag51 Ag10 | 81.35(3)   |
| Ag6 Ag5 Ag28  | 57.06(3)  | Ag34 Ag51 Ag50 | 92.49(4)   |
| Ag6 Ag5 Ag29  | 121.61(3) | Ag50 Ag51 Ag10 | 105.64(4)  |
| Ag6 Ag5 Ag30  | 62.75(3)  | S7 Ag51 Ag3    | 100.57(7)  |
| Ag6 Ag5 Ag35  | 60.78(3)  | S7 Ag51 Ag10   | 73.41(6)   |
| Ag6 Ag5 Ag36  | 123.72(3) | S7 Ag51 Ag34   | 51.49(7)   |
| Ag6 Ag5 Ag69  | 124.95(4) | S7 Ag51 Ag50   | 143.96(8)  |
| Ag8 Ag5 Ag10  | 95.24(3)  | S8 Ag51 Ag3    | 97.86(8)   |
| Ag8 Ag5 Ag28  | 60.13(3)  | S8 Ag51 Ag10   | 70.03(7)   |
| Ag8 Ag5 Ag29  | 88.42(3)  | S8 Ag51 Ag34   | 151.13(8)  |
| Ag8 Ag5 Ag30  | 111.04(3) | S8 Ag51 Ag50   | 98.65(9)   |
| Ag8 Ag5 Ag35  | 110.05(3) | S8 Ag51 S7     | 113.85(11) |
| Ag8 Ag5 Ag36  | 152.45(3) | S8 Ag51 S11    | 138.92(11) |
| Ag8 Ag5 Ag69  | 146.14(3) | S11 Ag51 Ag3   | 87.73(8)   |

|                         |                          |
|-------------------------|--------------------------|
| Ag9 Ag5 Ag8 60.68(3)    | S11 Ag51 Ag10 137.15(9)  |
| Ag9 Ag5 Ag10 62.30(2)   | S11 Ag51 Ag34 67.04(8)   |
| Ag9 Ag5 Ag28 96.83(3)   | S11 Ag51 Ag50 50.68(8)   |
| Ag9 Ag5 Ag29 60.51(3)   | S11 Ag51 S7 104.89(11)   |
| Ag9 Ag5 Ag30 154.21(3)  | Ag38 Ag52 Ag41 96.28(4)  |
| Ag9 Ag5 Ag35 144.45(3)  | Ag38 Ag52 Ag42 54.11(3)  |
| Ag9 Ag5 Ag36 108.17(3)  | Ag38 Ag52 Ag54 99.38(4)  |
| Ag9 Ag5 Ag69 109.53(4)  | Ag38 Ag52 Ag55 145.42(4) |
| Ag10 Ag5 Ag28 154.44(4) | Ag39 Ag52 Ag38 57.38(3)  |
| Ag10 Ag5 Ag29 110.79(3) | Ag39 Ag52 Ag41 53.02(3)  |
| Ag10 Ag5 Ag30 142.71(3) | Ag39 Ag52 Ag42 51.12(3)  |
| Ag10 Ag5 Ag35 86.32(3)  | Ag39 Ag52 Ag54 95.92(4)  |
| Ag10 Ag5 Ag36 58.78(3)  | Ag39 Ag52 Ag55 88.75(4)  |
| Ag10 Ag5 Ag69 108.65(3) | Ag41 Ag52 Ag54 52.68(3)  |
| Ag12 Ag5 Ag4 116.64(3)  | Ag42 Ag52 Ag41 48.22(3)  |
| Ag12 Ag5 Ag6 173.31(4)  | Ag42 Ag52 Ag54 52.51(3)  |
| Ag12 Ag5 Ag8 118.39(3)  | Ag42 Ag52 Ag55 111.77(4) |
| Ag12 Ag5 Ag9 57.72(3)   | Ag55 Ag52 Ag41 63.59(3)  |
| Ag12 Ag5 Ag10 56.80(2)  | Ag55 Ag52 Ag54 90.16(4)  |
| Ag12 Ag5 Ag28 126.41(3) | S12 Ag52 Ag38 119.51(9)  |
| Ag12 Ag5 Ag29 61.30(2)  | S12 Ag52 Ag39 89.81(7)   |
| Ag12 Ag5 Ag30 123.72(4) | S12 Ag52 Ag41 100.98(8)  |
| Ag12 Ag5 Ag35 119.71(3) | S12 Ag52 Ag42 138.95(8)  |
| Ag12 Ag5 Ag36 57.35(2)  | S12 Ag52 Ag54 136.39(9)  |
| Ag12 Ag5 Ag69 61.66(3)  | S12 Ag52 Ag55 46.66(8)   |
| Ag28 Ag5 Ag30 60.64(3)  | S12 Ag52 S14 91.97(11)   |
| Ag28 Ag5 Ag36 146.64(4) | S13 Ag52 Ag38 55.99(8)   |
| Ag28 Ag5 Ag69 91.66(3)  | S13 Ag52 Ag39 110.32(8)  |
| Ag29 Ag5 Ag28 65.12(3)  | S13 Ag52 Ag41 118.55(8)  |
| Ag29 Ag5 Ag30 96.39(3)  | S13 Ag52 Ag42 74.71(7)   |
| Ag29 Ag5 Ag35 154.00(4) | S13 Ag52 Ag54 76.99(8)   |
| Ag29 Ag5 Ag36 108.40(3) | S13 Ag52 Ag55 157.78(9)  |
| Ag29 Ag5 Ag69 61.12(3)  | S13 Ag52 S12 140.31(11)  |
| Ag35 Ag5 Ag28 107.58(3) | S13 Ag52 S14 110.22(11)  |
| Ag35 Ag5 Ag30 60.46(3)  | S14 Ag52 Ag38 144.69(8)  |
| Ag35 Ag5 Ag36 62.95(3)  | S14 Ag52 Ag39 111.68(7)  |
| Ag35 Ag5 Ag69 95.47(3)  | S14 Ag52 Ag41 59.73(6)   |
| Ag36 Ag5 Ag30 89.18(3)  | S14 Ag52 Ag42 92.03(7)   |
| Ag36 Ag5 Ag69 59.67(3)  | S14 Ag52 Ag54 45.92(7)   |
| Ag69 Ag5 Ag30 62.41(3)  | S14 Ag52 Ag55 49.88(7)   |

|      |     |      |           |      |      |      |            |
|------|-----|------|-----------|------|------|------|------------|
| Ag4  | Ag6 | Ag5  | 61.75(3)  | Ag42 | Ag53 | Ag54 | 62.60(3)   |
| Ag4  | Ag6 | Ag7  | 61.98(3)  | Ag42 | Ag53 | Ag65 | 111.48(4)  |
| Ag4  | Ag6 | Ag8  | 65.78(3)  | Ag42 | Ag53 | Ag66 | 72.32(4)   |
| Ag4  | Ag6 | Ag27 | 117.68(4) | Ag54 | Ag53 | Ag65 | 92.52(4)   |
| Ag4  | Ag6 | Ag28 | 120.21(4) | Ag54 | Ag53 | Ag66 | 134.16(5)  |
| Ag4  | Ag6 | Ag30 | 117.78(3) | Ag66 | Ag53 | Ag65 | 96.52(4)   |
| Ag4  | Ag6 | Ag31 | 138.93(3) | S13  | Ag53 | Ag42 | 81.31(7)   |
| Ag4  | Ag6 | Ag32 | 118.48(3) | S13  | Ag53 | Ag54 | 85.58(8)   |
| Ag4  | Ag6 | Ag33 | 62.38(3)  | S13  | Ag53 | Ag65 | 164.46(8)  |
| Ag4  | Ag6 | Ag35 | 61.72(3)  | S13  | Ag53 | Ag66 | 95.83(8)   |
| Ag5  | Ag6 | Ag27 | 116.56(3) | S28  | Ag53 | Ag42 | 110.77(8)  |
| Ag5  | Ag6 | Ag28 | 66.53(3)  | S28  | Ag53 | Ag54 | 53.27(7)   |
| Ag5  | Ag6 | Ag30 | 69.48(3)  | S28  | Ag53 | Ag65 | 53.61(7)   |
| Ag5  | Ag6 | Ag31 | 122.79(4) | S28  | Ag53 | Ag66 | 149.65(8)  |
| Ag5  | Ag6 | Ag32 | 177.72(4) | S28  | Ag53 | S13  | 114.51(10) |
| Ag5  | Ag6 | Ag33 | 113.62(3) | S30  | Ag53 | Ag42 | 118.08(8)  |
| Ag5  | Ag6 | Ag35 | 64.04(3)  | S30  | Ag53 | Ag54 | 150.68(8)  |
| Ag7  | Ag6 | Ag5  | 113.38(3) | S30  | Ag53 | Ag65 | 59.10(8)   |
| Ag7  | Ag6 | Ag27 | 65.44(3)  | S30  | Ag53 | Ag66 | 51.64(8)   |
| Ag7  | Ag6 | Ag28 | 119.39(4) | S30  | Ag53 | S13  | 123.73(11) |
| Ag7  | Ag6 | Ag30 | 175.01(4) | S30  | Ag53 | S28  | 106.59(11) |
| Ag7  | Ag6 | Ag31 | 122.65(4) | Ag41 | Ag54 | Ag43 | 66.23(4)   |
| Ag7  | Ag6 | Ag32 | 68.16(3)  | Ag41 | Ag54 | Ag45 | 60.77(3)   |
| Ag7  | Ag6 | Ag33 | 64.85(3)  | Ag41 | Ag54 | Ag52 | 63.64(3)   |
| Ag7  | Ag6 | Ag35 | 113.58(3) | Ag42 | Ag54 | Ag41 | 54.48(3)   |
| Ag8  | Ag6 | Ag5  | 62.93(3)  | Ag42 | Ag54 | Ag43 | 59.51(3)   |
| Ag8  | Ag6 | Ag7  | 63.55(3)  | Ag42 | Ag54 | Ag45 | 115.13(4)  |
| Ag8  | Ag6 | Ag27 | 62.37(3)  | Ag42 | Ag54 | Ag52 | 62.09(3)   |
| Ag8  | Ag6 | Ag28 | 65.39(3)  | Ag43 | Ag54 | Ag45 | 92.31(4)   |
| Ag8  | Ag6 | Ag30 | 121.23(3) | Ag43 | Ag54 | Ag52 | 117.71(4)  |
| Ag8  | Ag6 | Ag31 | 155.29(3) | Ag45 | Ag54 | Ag52 | 93.63(4)   |
| Ag8  | Ag6 | Ag32 | 119.32(4) | Ag53 | Ag54 | Ag41 | 112.51(4)  |
| Ag8  | Ag6 | Ag33 | 118.85(3) | Ag53 | Ag54 | Ag42 | 58.49(3)   |
| Ag8  | Ag6 | Ag35 | 117.66(3) | Ag53 | Ag54 | Ag43 | 87.35(4)   |
| Ag27 | Ag6 | Ag30 | 117.43(3) | Ag53 | Ag54 | Ag45 | 172.56(5)  |
| Ag27 | Ag6 | Ag31 | 97.08(3)  | Ag53 | Ag54 | Ag52 | 79.99(4)   |
| Ag27 | Ag6 | Ag32 | 65.50(3)  | S14  | Ag54 | Ag41 | 67.96(7)   |
| Ag27 | Ag6 | Ag33 | 119.32(4) | S14  | Ag54 | Ag42 | 105.77(8)  |
| Ag27 | Ag6 | Ag35 | 178.96(4) | S14  | Ag54 | Ag43 | 130.61(8)  |
| Ag28 | Ag6 | Ag27 | 63.31(3)  | S14  | Ag54 | Ag45 | 48.58(7)   |

|                         |                          |
|-------------------------|--------------------------|
| Ag28 Ag6 Ag30 65.32(3)  | S14 Ag54 Ag52 51.97(8)   |
| Ag28 Ag6 Ag31 93.86(3)  | S14 Ag54 Ag53 127.32(8)  |
| Ag28 Ag6 Ag32 114.40(3) | S14 Ag54 S27 100.66(10)  |
| Ag28 Ag6 Ag33 175.56(4) | S27 Ag54 Ag41 77.14(7)   |
| Ag28 Ag6 Ag35 117.70(4) | S27 Ag54 Ag42 107.09(7)  |
| Ag31 Ag6 Ag30 53.82(3)  | S27 Ag54 Ag43 51.87(7)   |
| Ag31 Ag6 Ag32 55.38(3)  | S27 Ag54 Ag45 52.10(7)   |
| Ag31 Ag6 Ag33 82.34(3)  | S27 Ag54 Ag52 138.00(8)  |
| Ag31 Ag6 Ag35 83.15(3)  | S27 Ag54 Ag53 131.63(8)  |
| Ag32 Ag6 Ag30 108.86(3) | S28 Ag54 Ag41 159.35(8)  |
| Ag33 Ag6 Ag30 110.39(3) | S28 Ag54 Ag42 110.56(8)  |
| Ag33 Ag6 Ag32 65.28(3)  | S28 Ag54 Ag43 94.30(8)   |
| Ag33 Ag6 Ag35 59.69(3)  | S28 Ag54 Ag45 130.22(9)  |
| Ag35 Ag6 Ag30 63.52(3)  | S28 Ag54 Ag52 125.38(8)  |
| Ag35 Ag6 Ag32 113.91(3) | S28 Ag54 Ag53 57.20(8)   |
| Ag4 Ag7 Ag8 61.75(3)    | S28 Ag54 S14 132.69(10)  |
| Ag4 Ag7 Ag21 92.47(3)   | S28 Ag54 S27 96.61(11)   |
| Ag4 Ag7 Ag23 61.14(3)   | Ag40 Ag55 Ag41 50.77(3)  |
| Ag4 Ag7 Ag24 117.03(3)  | Ag40 Ag55 Ag46 52.00(3)  |
| Ag4 Ag7 Ag26 149.91(4)  | Ag40 Ag55 Ag52 81.55(3)  |
| Ag4 Ag7 Ag27 108.15(3)  | Ag46 Ag55 Ag41 46.72(2)  |
| Ag4 Ag7 Ag32 110.34(4)  | Ag46 Ag55 Ag52 105.39(4) |
| Ag4 Ag7 Ag33 58.96(3)   | Ag47 Ag55 Ag40 58.49(3)  |
| Ag4 Ag7 Ag64 98.29(3)   | Ag47 Ag55 Ag41 94.51(3)  |
| Ag6 Ag7 Ag4 57.34(3)    | Ag47 Ag55 Ag46 54.49(3)  |
| Ag6 Ag7 Ag8 57.02(3)    | Ag47 Ag55 Ag52 139.81(4) |
| Ag6 Ag7 Ag21 117.18(3)  | Ag52 Ag55 Ag41 58.71(3)  |
| Ag6 Ag7 Ag23 118.47(3)  | S12 Ag55 Ag40 84.67(7)   |
| Ag6 Ag7 Ag24 173.34(4)  | S12 Ag55 Ag41 96.39(7)   |
| Ag6 Ag7 Ag26 123.98(3)  | S12 Ag55 Ag46 134.10(7)  |
| Ag6 Ag7 Ag27 58.74(3)   | S12 Ag55 Ag47 119.03(8)  |
| Ag6 Ag7 Ag32 62.71(3)   | S12 Ag55 Ag52 46.30(8)   |
| Ag6 Ag7 Ag33 59.10(3)   | S12 Ag55 S14 93.53(10)   |
| Ag6 Ag7 Ag64 125.55(4)  | S14 Ag55 Ag40 107.62(7)  |
| Ag8 Ag7 Ag27 58.14(3)   | S14 Ag55 Ag41 57.73(6)   |
| Ag8 Ag7 Ag32 109.77(3)  | S14 Ag55 Ag46 87.16(7)   |
| Ag8 Ag7 Ag33 108.49(3)  | S14 Ag55 Ag47 140.50(8)  |
| Ag8 Ag7 Ag64 155.93(4)  | S14 Ag55 Ag52 51.93(8)   |
| Ag21 Ag7 Ag8 60.17(3)   | S15 Ag55 Ag40 114.09(7)  |
| Ag21 Ag7 Ag27 89.40(3)  | S15 Ag55 Ag41 120.35(7)  |



|               |           |                |            |
|---------------|-----------|----------------|------------|
| Ag21 Ag7 Ag32 | 147.29(3) | S15 Ag55 Ag46  | 77.53(7)   |
| Ag21 Ag7 Ag33 | 149.27(3) | S15 Ag55 Ag47  | 58.16(7)   |
| Ag21 Ag7 Ag64 | 111.14(4) | S15 Ag55 Ag52  | 159.80(8)  |
| Ag23 Ag7 Ag8  | 94.95(3)  | S15 Ag55 S12   | 142.99(11) |
| Ag23 Ag7 Ag21 | 65.48(3)  | S15 Ag55 S14   | 109.07(11) |
| Ag23 Ag7 Ag26 | 109.31(4) | Ag45 Ag56 Ag59 | 95.13(4)   |
| Ag23 Ag7 Ag27 | 150.85(4) | Ag46 Ag56 Ag45 | 61.44(3)   |
| Ag23 Ag7 Ag32 | 146.12(4) | Ag46 Ag56 Ag59 | 109.64(3)  |
| Ag23 Ag7 Ag33 | 88.94(3)  | Ag57 Ag56 Ag45 | 135.50(5)  |
| Ag23 Ag7 Ag64 | 62.09(3)  | Ag57 Ag56 Ag46 | 74.77(4)   |
| Ag24 Ag7 Ag8  | 117.92(3) | Ag57 Ag56 Ag59 | 92.16(4)   |
| Ag24 Ag7 Ag21 | 57.87(3)  | S15 Ag56 Ag45  | 92.00(8)   |
| Ag24 Ag7 Ag23 | 56.12(2)  | S15 Ag56 Ag46  | 83.86(7)   |
| Ag24 Ag7 Ag26 | 58.56(3)  | S15 Ag56 Ag57  | 90.77(8)   |
| Ag24 Ag7 Ag27 | 123.52(3) | S15 Ag56 Ag59  | 166.48(7)  |
| Ag24 Ag7 Ag32 | 123.94(4) | S15 Ag56 S20   | 122.86(10) |
| Ag24 Ag7 Ag33 | 122.30(3) | S19 Ag56 Ag45  | 52.96(9)   |
| Ag24 Ag7 Ag64 | 56.87(3)  | S19 Ag56 Ag46  | 107.49(9)  |
| Ag26 Ag7 Ag8  | 92.88(3)  | S19 Ag56 Ag57  | 146.20(8)  |
| Ag26 Ag7 Ag21 | 59.17(3)  | S19 Ag56 Ag59  | 54.76(8)   |
| Ag26 Ag7 Ag27 | 65.25(3)  | S19 Ag56 S15   | 122.99(10) |
| Ag26 Ag7 Ag32 | 92.67(3)  | S19 Ag56 S20   | 101.85(11) |
| Ag26 Ag7 Ag33 | 150.81(4) | S20 Ag56 Ag45  | 145.13(8)  |
| Ag26 Ag7 Ag64 | 101.28(4) | S20 Ag56 Ag46  | 116.60(7)  |
| Ag27 Ag7 Ag32 | 61.84(3)  | S20 Ag56 Ag57  | 51.73(7)   |
| Ag33 Ag7 Ag27 | 109.10(4) | S20 Ag56 Ag59  | 51.12(7)   |
| Ag33 Ag7 Ag32 | 61.87(3)  | Ag46 Ag57 Ag22 | 44.91(2)   |
| Ag64 Ag7 Ag27 | 145.81(4) | Ag46 Ag57 Ag58 | 48.70(2)   |
| Ag64 Ag7 Ag32 | 89.09(3)  | Ag47 Ag57 Ag22 | 50.90(2)   |
| Ag64 Ag7 Ag33 | 66.61(3)  | Ag47 Ag57 Ag46 | 50.15(3)   |
| Ag1 Ag8 Ag2   | 55.48(2)  | Ag47 Ag57 Ag58 | 91.62(4)   |
| Ag1 Ag8 Ag4   | 114.86(3) | Ag47 Ag57 Ag60 | 88.87(4)   |
| Ag1 Ag8 Ag5   | 116.81(3) | Ag56 Ag57 Ag22 | 97.91(4)   |
| Ag1 Ag8 Ag6   | 171.58(3) | Ag56 Ag57 Ag46 | 53.37(3)   |
| Ag1 Ag8 Ag7   | 117.32(3) | Ag56 Ag57 Ag47 | 74.32(4)   |
| Ag1 Ag8 Ag9   | 57.86(3)  | Ag56 Ag57 Ag58 | 83.68(4)   |
| Ag1 Ag8 Ag15  | 60.72(3)  | Ag56 Ag57 Ag60 | 158.99(5)  |
| Ag1 Ag8 Ag21  | 57.91(3)  | Ag58 Ag57 Ag22 | 49.87(2)   |
| Ag1 Ag8 Ag27  | 125.10(4) | Ag60 Ag57 Ag22 | 61.28(3)   |
| Ag1 Ag8 Ag28  | 127.74(3) | Ag60 Ag57 Ag46 | 106.10(4)  |

|      |     |      |           |      |      |      |            |
|------|-----|------|-----------|------|------|------|------------|
| Ag2  | Ag8 | Ag15 | 116.02(4) | Ag60 | Ag57 | Ag58 | 84.31(4)   |
| Ag4  | Ag8 | Ag2  | 59.45(2)  | S16  | Ag57 | Ag22 | 59.94(7)   |
| Ag4  | Ag8 | Ag15 | 175.18(4) | S16  | Ag57 | Ag46 | 89.39(8)   |
| Ag4  | Ag8 | Ag28 | 107.41(3) | S16  | Ag57 | Ag47 | 109.70(8)  |
| Ag5  | Ag8 | Ag2  | 88.89(3)  | S16  | Ag57 | Ag56 | 129.33(8)  |
| Ag5  | Ag8 | Ag4  | 57.96(2)  | S16  | Ag57 | Ag58 | 46.47(7)   |
| Ag5  | Ag8 | Ag7  | 107.76(3) | S16  | Ag57 | Ag60 | 44.82(7)   |
| Ag5  | Ag8 | Ag9  | 58.99(3)  | S20  | Ag57 | Ag22 | 143.20(9)  |
| Ag5  | Ag8 | Ag15 | 125.08(3) | S20  | Ag57 | Ag46 | 103.72(9)  |
| Ag5  | Ag8 | Ag21 | 143.48(3) | S20  | Ag57 | Ag47 | 130.42(9)  |
| Ag5  | Ag8 | Ag27 | 113.35(4) | S20  | Ag57 | Ag56 | 58.33(8)   |
| Ag5  | Ag8 | Ag28 | 63.27(3)  | S20  | Ag57 | Ag58 | 96.67(8)   |
| Ag6  | Ag8 | Ag2  | 116.11(3) | S20  | Ag57 | Ag60 | 140.51(9)  |
| Ag6  | Ag8 | Ag4  | 56.72(2)  | S20  | Ag57 | S16  | 111.17(10) |
| Ag6  | Ag8 | Ag5  | 59.90(3)  | S20  | Ag57 | S26  | 145.36(11) |
| Ag6  | Ag8 | Ag7  | 59.43(3)  | S26  | Ag57 | Ag22 | 69.46(7)   |
| Ag6  | Ag8 | Ag9  | 118.57(3) | S26  | Ag57 | Ag46 | 98.20(8)   |
| Ag6  | Ag8 | Ag15 | 127.69(4) | S26  | Ag57 | Ag47 | 51.92(7)   |
| Ag6  | Ag8 | Ag21 | 119.33(3) | S26  | Ag57 | Ag56 | 120.19(8)  |
| Ag6  | Ag8 | Ag27 | 61.60(3)  | S26  | Ag57 | Ag58 | 117.92(8)  |
| Ag6  | Ag8 | Ag28 | 58.94(3)  | S26  | Ag57 | Ag60 | 52.48(7)   |
| Ag7  | Ag8 | Ag2  | 85.33(3)  | S26  | Ag57 | S16  | 95.39(10)  |
| Ag7  | Ag8 | Ag4  | 57.85(2)  | Ag20 | Ag58 | Ag22 | 59.66(3)   |
| Ag7  | Ag8 | Ag15 | 121.58(3) | Ag20 | Ag58 | Ag25 | 88.58(3)   |
| Ag7  | Ag8 | Ag21 | 59.91(3)  | Ag20 | Ag58 | Ag44 | 71.13(5)   |
| Ag7  | Ag8 | Ag27 | 63.80(3)  | Ag20 | Ag58 | Ag46 | 57.54(2)   |
| Ag7  | Ag8 | Ag28 | 110.52(3) | Ag20 | Ag58 | Ag57 | 115.73(3)  |
| Ag9  | Ag8 | Ag2  | 57.53(2)  | Ag22 | Ag58 | Ag25 | 62.38(3)   |
| Ag9  | Ag8 | Ag4  | 85.85(3)  | Ag22 | Ag58 | Ag44 | 113.57(4)  |
| Ag9  | Ag8 | Ag7  | 138.77(3) | Ag22 | Ag58 | Ag57 | 65.45(3)   |
| Ag9  | Ag8 | Ag15 | 92.86(3)  | Ag25 | Ag58 | Ag44 | 156.49(5)  |
| Ag9  | Ag8 | Ag21 | 105.71(3) | Ag25 | Ag58 | Ag57 | 93.99(3)   |
| Ag9  | Ag8 | Ag27 | 156.31(4) | Ag44 | Ag58 | Ag57 | 105.30(4)  |
| Ag9  | Ag8 | Ag28 | 97.80(3)  | Ag46 | Ag58 | Ag22 | 54.34(2)   |
| Ag21 | Ag8 | Ag2  | 57.48(2)  | Ag46 | Ag58 | Ag25 | 116.58(4)  |
| Ag21 | Ag8 | Ag4  | 90.02(3)  | Ag46 | Ag58 | Ag44 | 62.60(3)   |
| Ag21 | Ag8 | Ag15 | 85.86(3)  | Ag46 | Ag58 | Ag57 | 64.57(3)   |
| Ag21 | Ag8 | Ag28 | 151.72(4) | S16  | Ag58 | Ag20 | 126.78(8)  |
| Ag27 | Ag8 | Ag2  | 145.81(4) | S16  | Ag58 | Ag22 | 69.16(7)   |
| Ag27 | Ag8 | Ag4  | 109.57(3) | S16  | Ag58 | Ag25 | 53.70(7)   |

|               |           |                |            |
|---------------|-----------|----------------|------------|
| Ag27 Ag8 Ag15 | 73.15(3)  | S16 Ag58 Ag44  | 149.19(8)  |
| Ag27 Ag8 Ag21 | 92.54(3)  | S16 Ag58 Ag46  | 103.42(7)  |
| Ag27 Ag8 Ag28 | 61.00(3)  | S16 Ag58 Ag57  | 46.07(6)   |
| Ag28 Ag8 Ag2  | 150.77(4) | S16 Ag58 S17   | 94.52(10)  |
| Ag28 Ag8 Ag15 | 77.36(3)  | S17 Ag58 Ag20  | 79.87(8)   |
| Ag1 Ag9 Ag2   | 57.63(2)  | S17 Ag58 Ag22  | 98.23(7)   |
| Ag1 Ag9 Ag5   | 117.57(3) | S17 Ag58 Ag25  | 47.86(7)   |
| Ag1 Ag9 Ag8   | 57.27(2)  | S17 Ag58 Ag44  | 114.63(8)  |
| Ag1 Ag9 Ag10  | 121.52(3) | S17 Ag58 Ag46  | 136.45(8)  |
| Ag1 Ag9 Ag11  | 121.03(3) | S17 Ag58 Ag57  | 140.05(8)  |
| Ag1 Ag9 Ag12  | 177.38(4) | S18 Ag58 Ag20  | 114.92(8)  |
| Ag1 Ag9 Ag13  | 119.99(3) | S18 Ag58 Ag22  | 141.39(7)  |
| Ag1 Ag9 Ag14  | 63.91(4)  | S18 Ag58 Ag25  | 152.36(7)  |
| Ag1 Ag9 Ag19  | 58.10(2)  | S18 Ag58 Ag44  | 43.89(8)   |
| Ag1 Ag9 Ag29  | 117.96(3) | S18 Ag58 Ag46  | 89.38(7)   |
| Ag2 Ag9 Ag8   | 63.87(3)  | S18 Ag58 Ag57  | 88.71(7)   |
| Ag2 Ag9 Ag10  | 64.12(3)  | S18 Ag58 S16   | 113.73(10) |
| Ag2 Ag9 Ag13  | 148.65(4) | S18 Ag58 S17   | 119.16(9)  |
| Ag2 Ag9 Ag19  | 61.33(3)  | S18 Ag59 Ag56  | 82.79(7)   |
| Ag2 Ag9 Ag29  | 150.37(4) | S18 Ag59 S19   | 93.86(10)  |
| Ag5 Ag9 Ag2   | 93.42(3)  | S19 Ag59 Ag56  | 50.28(7)   |
| Ag5 Ag9 Ag8   | 60.34(3)  | S20 Ag59 Ag56  | 52.87(8)   |
| Ag5 Ag9 Ag10  | 59.69(2)  | S20 Ag59 S18   | 97.91(10)  |
| Ag5 Ag9 Ag13  | 111.57(3) | S20 Ag59 S19   | 99.30(10)  |
| Ag5 Ag9 Ag19  | 153.26(3) | P1 Ag59 Ag56   | 155.00(9)  |
| Ag5 Ag9 Ag29  | 61.44(3)  | P1 Ag59 S18    | 117.56(11) |
| Ag8 Ag9 Ag10  | 93.45(3)  | P1 Ag59 S19    | 110.48(11) |
| Ag8 Ag9 Ag13  | 145.09(3) | P1 Ag59 S20    | 130.65(12) |
| Ag8 Ag9 Ag19  | 110.10(3) | Ag24 Ag60 Ag22 | 47.48(3)   |
| Ag8 Ag9 Ag29  | 88.74(3)  | Ag24 Ag60 Ag25 | 54.93(3)   |
| Ag11 Ag9 Ag2  | 89.06(3)  | Ag24 Ag60 Ag48 | 52.50(3)   |
| Ag11 Ag9 Ag5  | 110.91(3) | Ag24 Ag60 Ag57 | 108.98(4)  |
| Ag11 Ag9 Ag8  | 149.45(3) | Ag25 Ag60 Ag22 | 55.33(3)   |
| Ag11 Ag9 Ag10 | 60.29(2)  | Ag25 Ag60 Ag48 | 100.89(5)  |
| Ag11 Ag9 Ag13 | 64.96(3)  | Ag48 Ag60 Ag22 | 54.71(3)   |
| Ag11 Ag9 Ag19 | 63.38(3)  | Ag57 Ag60 Ag22 | 61.98(3)   |
| Ag11 Ag9 Ag29 | 113.52(3) | Ag57 Ag60 Ag25 | 93.69(4)   |
| Ag12 Ag9 Ag2  | 120.61(3) | Ag57 Ag60 Ag48 | 83.29(3)   |
| Ag12 Ag9 Ag5  | 60.11(3)  | Ag61 Ag60 Ag22 | 105.60(5)  |
| Ag12 Ag9 Ag8  | 120.44(3) | Ag61 Ag60 Ag24 | 58.37(4)   |

|               |           |                |            |
|---------------|-----------|----------------|------------|
| Ag12 Ag9 Ag10 | 56.57(2)  | Ag61 Ag60 Ag25 | 80.17(5)   |
| Ag12 Ag9 Ag11 | 60.09(3)  | Ag61 Ag60 Ag48 | 86.90(4)   |
| Ag12 Ag9 Ag13 | 62.58(3)  | Ag61 Ag60 Ag57 | 167.26(6)  |
| Ag12 Ag9 Ag14 | 117.85(4) | S16 Ag60 Ag22  | 61.26(8)   |
| Ag12 Ag9 Ag19 | 123.28(3) | S16 Ag60 Ag24  | 96.48(9)   |
| Ag12 Ag9 Ag29 | 62.41(3)  | S16 Ag60 Ag25  | 51.41(8)   |
| Ag13 Ag9 Ag10 | 111.85(3) | S16 Ag60 Ag48  | 112.87(8)  |
| Ag13 Ag9 Ag19 | 90.19(3)  | S16 Ag60 Ag57  | 48.99(7)   |
| Ag14 Ag9 Ag2  | 121.53(4) | S16 Ag60 Ag61  | 129.46(9)  |
| Ag14 Ag9 Ag5  | 114.77(4) | S16 Ag60 S26   | 92.62(9)   |
| Ag14 Ag9 Ag8  | 86.41(3)  | S24 Ag60 Ag22  | 148.79(10) |
| Ag14 Ag9 Ag10 | 173.21(5) | S24 Ag60 Ag24  | 109.31(10) |
| Ag14 Ag9 Ag11 | 121.57(4) | S24 Ag60 Ag25  | 135.09(10) |
| Ag14 Ag9 Ag13 | 65.62(4)  | S24 Ag60 Ag48  | 95.42(10)  |
| Ag14 Ag9 Ag19 | 87.84(4)  | S24 Ag60 Ag57  | 129.85(10) |
| Ag14 Ag9 Ag29 | 63.76(4)  | S24 Ag60 Ag61  | 59.13(9)   |
| Ag19 Ag9 Ag10 | 98.56(3)  | S24 Ag60 S16   | 149.91(14) |
| Ag29 Ag9 Ag10 | 109.46(3) | S24 Ag60 S26   | 99.96(11)  |
| Ag29 Ag9 Ag13 | 60.88(3)  | S26 Ag60 Ag22  | 67.53(7)   |
| Ag29 Ag9 Ag19 | 145.28(4) | S26 Ag60 Ag24  | 95.24(7)   |
| Ag2 Ag10 Ag51 | 111.05(3) | S26 Ag60 Ag25  | 121.62(7)  |
| Ag3 Ag10 Ag2  | 55.71(2)  | S26 Ag60 Ag48  | 46.88(7)   |
| Ag3 Ag10 Ag4  | 57.71(2)  | S26 Ag60 Ag57  | 45.46(6)   |
| Ag3 Ag10 Ag5  | 116.16(3) | S26 Ag60 Ag61  | 129.41(8)  |
| Ag3 Ag10 Ag9  | 111.86(3) | Ag24 Ag61 Ag63 | 110.99(4)  |
| Ag3 Ag10 Ag11 | 116.30(3) | Ag60 Ag61 Ag24 | 66.88(4)   |
| Ag3 Ag10 Ag36 | 128.83(3) | Ag60 Ag61 Ag62 | 142.46(6)  |
| Ag3 Ag10 Ag37 | 127.64(3) | Ag60 Ag61 Ag63 | 95.31(4)   |
| Ag3 Ag10 Ag39 | 57.64(3)  | Ag62 Ag61 Ag24 | 75.62(4)   |
| Ag3 Ag10 Ag51 | 55.55(3)  | Ag62 Ag61 Ag63 | 96.55(5)   |
| Ag4 Ag10 Ag2  | 59.62(3)  | S22 Ag61 Ag24  | 116.64(9)  |
| Ag4 Ag10 Ag5  | 58.72(2)  | S22 Ag61 Ag60  | 150.30(9)  |
| Ag4 Ag10 Ag9  | 85.90(3)  | S22 Ag61 Ag62  | 50.88(9)   |
| Ag4 Ag10 Ag11 | 138.31(3) | S22 Ag61 Ag63  | 55.24(8)   |
| Ag4 Ag10 Ag36 | 96.99(3)  | S22 Ag61 S24   | 103.84(11) |
| Ag4 Ag10 Ag37 | 155.05(4) | S24 Ag61 Ag24  | 110.83(9)  |
| Ag4 Ag10 Ag39 | 106.02(3) | S24 Ag61 Ag60  | 52.20(8)   |
| Ag4 Ag10 Ag51 | 88.15(3)  | S24 Ag61 Ag62  | 150.27(9)  |
| Ag5 Ag10 Ag2  | 87.69(3)  | S24 Ag61 Ag63  | 53.76(8)   |
| Ag5 Ag10 Ag9  | 58.02(2)  | S25 Ag61 Ag24  | 76.98(7)   |

|      |      |      |           |      |      |      |            |
|------|------|------|-----------|------|------|------|------------|
| Ag5  | Ag10 | Ag36 | 64.28(3)  | S25  | Ag61 | Ag60 | 85.11(8)   |
| Ag5  | Ag10 | Ag37 | 112.33(3) | S25  | Ag61 | Ag62 | 88.12(8)   |
| Ag5  | Ag10 | Ag51 | 127.17(3) | S25  | Ag61 | Ag63 | 171.53(8)  |
| Ag9  | Ag10 | Ag2  | 56.23(2)  | S25  | Ag61 | S22  | 124.58(11) |
| Ag9  | Ag10 | Ag37 | 109.64(3) | S25  | Ag61 | S24  | 121.53(12) |
| Ag9  | Ag10 | Ag51 | 167.20(4) | Ag26 | Ag62 | Ag24 | 48.41(3)   |
| Ag11 | Ag10 | Ag2  | 82.65(3)  | Ag26 | Ag62 | Ag32 | 87.14(4)   |
| Ag11 | Ag10 | Ag5  | 106.41(3) | Ag26 | Ag62 | Ag64 | 89.22(4)   |
| Ag11 | Ag10 | Ag9  | 56.66(2)  | Ag32 | Ag62 | Ag24 | 104.71(4)  |
| Ag11 | Ag10 | Ag36 | 111.29(3) | Ag61 | Ag62 | Ag24 | 52.65(3)   |
| Ag11 | Ag10 | Ag37 | 64.96(3)  | Ag61 | Ag62 | Ag26 | 76.18(5)   |
| Ag11 | Ag10 | Ag51 | 124.20(3) | Ag61 | Ag62 | Ag32 | 157.32(6)  |
| Ag12 | Ag10 | Ag2  | 113.20(3) | Ag61 | Ag62 | Ag64 | 79.54(4)   |
| Ag12 | Ag10 | Ag3  | 168.90(3) | Ag64 | Ag62 | Ag24 | 47.75(3)   |
| Ag12 | Ag10 | Ag4  | 118.09(3) | Ag64 | Ag62 | Ag32 | 85.05(4)   |
| Ag12 | Ag10 | Ag5  | 59.62(2)  | S6   | Ag62 | Ag24 | 89.61(7)   |
| Ag12 | Ag10 | Ag9  | 57.05(2)  | S6   | Ag62 | Ag26 | 108.42(8)  |
| Ag12 | Ag10 | Ag11 | 58.86(3)  | S6   | Ag62 | Ag32 | 45.08(7)   |
| Ag12 | Ag10 | Ag36 | 60.18(3)  | S6   | Ag62 | Ag61 | 126.33(8)  |
| Ag12 | Ag10 | Ag37 | 61.04(3)  | S6   | Ag62 | Ag64 | 47.94(7)   |
| Ag12 | Ag10 | Ag39 | 118.20(3) | S21  | Ag62 | Ag24 | 95.79(9)   |
| Ag12 | Ag10 | Ag51 | 135.52(4) | S21  | Ag62 | Ag26 | 52.53(8)   |
| Ag36 | Ag10 | Ag2  | 150.97(3) | S21  | Ag62 | Ag32 | 47.57(8)   |
| Ag36 | Ag10 | Ag9  | 109.15(3) | S21  | Ag62 | Ag61 | 125.33(11) |
| Ag36 | Ag10 | Ag37 | 59.97(3)  | S21  | Ag62 | Ag64 | 113.39(9)  |
| Ag36 | Ag10 | Ag51 | 82.81(3)  | S21  | Ag62 | S6   | 90.58(11)  |
| Ag37 | Ag10 | Ag2  | 145.28(4) | S22  | Ag62 | Ag24 | 102.46(9)  |
| Ag37 | Ag10 | Ag51 | 79.99(3)  | S22  | Ag62 | Ag26 | 132.54(11) |
| Ag39 | Ag10 | Ag2  | 56.47(2)  | S22  | Ag62 | Ag32 | 140.27(11) |
| Ag39 | Ag10 | Ag5  | 141.41(3) | S22  | Ag62 | Ag61 | 57.63(9)   |
| Ag39 | Ag10 | Ag9  | 87.57(3)  | S22  | Ag62 | Ag64 | 92.37(8)   |
| Ag39 | Ag10 | Ag11 | 59.37(3)  | S22  | Ag62 | S6   | 107.42(12) |
| Ag39 | Ag10 | Ag36 | 152.56(4) | S22  | Ag62 | S21  | 154.23(12) |
| Ag39 | Ag10 | Ag37 | 94.37(3)  | S22  | Ag63 | Ag61 | 53.81(8)   |
| Ag39 | Ag10 | Ag51 | 83.19(3)  | S23  | Ag63 | Ag61 | 83.31(7)   |
| Ag9  | Ag11 | Ag10 | 63.05(3)  | S23  | Ag63 | S22  | 98.83(10)  |
| Ag9  | Ag11 | Ag13 | 59.68(3)  | S23  | Ag63 | S24  | 96.93(11)  |
| Ag9  | Ag11 | Ag18 | 92.90(3)  | S24  | Ag63 | Ag61 | 54.54(8)   |
| Ag9  | Ag11 | Ag19 | 60.71(3)  | S24  | Ag63 | S22  | 103.24(11) |
| Ag9  | Ag11 | Ag37 | 109.89(3) | P2   | Ag63 | Ag61 | 153.33(10) |

|                          |                          |
|--------------------------|--------------------------|
| Ag9 Ag11 Ag38 146.52(4)  | P2 Ag63 S22 113.46(13)   |
| Ag9 Ag11 Ag39 91.81(3)   | P2 Ag63 S23 123.26(12)   |
| Ag9 Ag11 Ag66 150.37(3)  | P2 Ag63 S24 117.62(13)   |
| Ag10 Ag11 Ag13 109.89(3) | Ag7 Ag64 Ag23 56.97(3)   |
| Ag10 Ag11 Ag18 152.90(4) | Ag7 Ag64 Ag33 57.91(3)   |
| Ag10 Ag11 Ag19 98.61(3)  | Ag7 Ag64 Ag48 107.22(4)  |
| Ag10 Ag11 Ag37 58.96(3)  | Ag7 Ag64 Ag49 101.49(4)  |
| Ag10 Ag11 Ag38 88.22(3)  | Ag7 Ag64 Ag62 71.22(4)   |
| Ag10 Ag11 Ag66 145.15(3) | Ag23 Ag64 Ag33 81.77(3)  |
| Ag12 Ag11 Ag9 58.82(3)   | Ag23 Ag64 Ag48 56.81(3)  |
| Ag12 Ag11 Ag10 57.16(2)  | Ag23 Ag64 Ag49 53.27(3)  |
| Ag12 Ag11 Ag13 60.26(2)  | Ag23 Ag64 Ag62 119.03(4) |
| Ag12 Ag11 Ag18 122.60(3) | Ag24 Ag64 Ag7 59.10(3)   |
| Ag12 Ag11 Ag19 119.37(3) | Ag24 Ag64 Ag23 55.03(3)  |
| Ag12 Ag11 Ag37 58.28(2)  | Ag24 Ag64 Ag33 115.97(4) |
| Ag12 Ag11 Ag38 120.88(3) | Ag24 Ag64 Ag48 60.54(3)  |
| Ag12 Ag11 Ag39 117.44(3) | Ag24 Ag64 Ag49 101.49(4) |
| Ag12 Ag11 Ag66 121.23(4) | Ag24 Ag64 Ag62 72.50(4)  |
| Ag13 Ag11 Ag37 108.83(3) | Ag24 Ag64 S38 136.38(7)  |
| Ag13 Ag11 Ag66 93.52(3)  | Ag33 Ag64 Ag49 80.71(3)  |
| Ag18 Ag11 Ag13 62.34(3)  | Ag48 Ag64 Ag33 132.33(4) |
| Ag18 Ag11 Ag19 56.39(3)  | Ag48 Ag64 Ag49 56.67(3)  |
| Ag18 Ag11 Ag37 147.29(4) | Ag48 Ag64 Ag62 121.92(5) |
| Ag18 Ag11 Ag66 61.19(3)  | Ag62 Ag64 Ag33 97.24(4)  |
| Ag19 Ag11 Ag13 86.12(3)  | Ag62 Ag64 Ag49 172.16(5) |
| Ag19 Ag11 Ag37 155.89(4) | S6 Ag64 Ag7 72.52(7)     |
| Ag19 Ag11 Ag66 108.69(3) | S6 Ag64 Ag23 124.07(8)   |
| Ag37 Ag11 Ag66 89.66(3)  | S6 Ag64 Ag24 117.71(7)   |
| Ag38 Ag11 Ag13 153.12(4) | S6 Ag64 Ag33 49.75(8)    |
| Ag38 Ag11 Ag18 109.57(3) | S6 Ag64 Ag48 177.50(9)   |
| Ag38 Ag11 Ag19 111.37(3) | S6 Ag64 Ag49 125.82(8)   |
| Ag38 Ag11 Ag37 62.92(3)  | S6 Ag64 Ag62 55.59(8)    |
| Ag38 Ag11 Ag66 62.13(3)  | S6 Ag64 S23 128.07(10)   |
| Ag39 Ag11 Ag10 60.31(3)  | S6 Ag64 S38 84.20(9)     |
| Ag39 Ag11 Ag13 149.01(4) | S23 Ag64 Ag7 150.46(8)   |
| Ag39 Ag11 Ag18 111.69(3) | S23 Ag64 Ag23 107.85(7)  |
| Ag39 Ag11 Ag19 68.01(3)  | S23 Ag64 Ag24 91.36(8)   |
| Ag39 Ag11 Ag37 91.33(3)  | S23 Ag64 Ag33 150.54(8)  |
| Ag39 Ag11 Ag38 57.33(3)  | S23 Ag64 Ag48 51.17(7)   |
| Ag39 Ag11 Ag66 110.34(3) | S23 Ag64 Ag49 83.30(7)   |

|                |           |      |           |            |
|----------------|-----------|------|-----------|------------|
| Ag42 Ag11 Ag9  | 117.13(4) | S23  | Ag64 Ag62 | 101.63(7)  |
| Ag42 Ag11 Ag10 | 118.04(3) | S23  | Ag64 S38  | 104.05(9)  |
| Ag42 Ag11 Ag12 | 174.42(4) | S38  | Ag64 Ag7  | 98.59(7)   |
| Ag42 Ag11 Ag13 | 121.97(3) | S38  | Ag64 Ag23 | 81.36(7)   |
| Ag42 Ag11 Ag18 | 60.00(3)  | S38  | Ag64 Ag33 | 48.74(6)   |
| Ag42 Ag11 Ag19 | 57.10(2)  | S38  | Ag64 Ag48 | 98.29(7)   |
| Ag42 Ag11 Ag37 | 122.78(3) | S38  | Ag64 Ag49 | 42.51(6)   |
| Ag42 Ag11 Ag38 | 59.87(3)  | S38  | Ag64 Ag62 | 139.80(7)  |
| Ag42 Ag11 Ag39 | 57.74(3)  | S28  | Ag65 Ag53 | 54.92(8)   |
| Ag42 Ag11 Ag66 | 64.28(3)  | S28  | Ag65 S29  | 105.62(10) |
| Ag5 Ag12 Ag13  | 112.80(3) | S28  | Ag65 S30  | 101.99(10) |
| Ag5 Ag12 Ag29  | 61.98(3)  | S29  | Ag65 Ag53 | 82.68(7)   |
| Ag5 Ag12 Ag36  | 67.05(3)  | S29  | Ag65 S30  | 90.57(10)  |
| Ag5 Ag12 Ag37  | 118.36(3) | S30  | Ag65 Ag53 | 52.68(7)   |
| Ag5 Ag12 Ag67  | 176.69(3) | P4   | Ag65 Ag53 | 156.44(10) |
| Ag5 Ag12 Ag68  | 123.06(3) | P4   | Ag65 S28  | 119.76(12) |
| Ag5 Ag12 Ag69  | 66.94(3)  | P4   | Ag65 S29  | 119.35(11) |
| Ag9 Ag12 Ag5   | 62.17(3)  | P4   | Ag65 S30  | 114.61(12) |
| Ag9 Ag12 Ag11  | 61.09(3)  | Ag18 | Ag66 Ag11 | 51.74(3)   |
| Ag9 Ag12 Ag13  | 62.05(3)  | Ag18 | Ag66 Ag38 | 93.09(4)   |
| Ag9 Ag12 Ag29  | 62.13(3)  | Ag18 | Ag66 Ag42 | 50.53(3)   |
| Ag9 Ag12 Ag36  | 120.29(3) | Ag18 | Ag66 Ag67 | 89.63(4)   |
| Ag9 Ag12 Ag37  | 120.00(3) | Ag38 | Ag66 Ag11 | 51.16(3)   |
| Ag9 Ag12 Ag67  | 120.61(3) | Ag38 | Ag66 Ag42 | 49.95(3)   |
| Ag9 Ag12 Ag68  | 137.67(3) | Ag38 | Ag66 Ag67 | 88.08(4)   |
| Ag9 Ag12 Ag69  | 117.38(3) | Ag42 | Ag66 Ag11 | 46.60(2)   |
| Ag10 Ag12 Ag5  | 63.59(3)  | Ag42 | Ag66 Ag67 | 109.89(4)  |
| Ag10 Ag12 Ag9  | 66.38(3)  | Ag53 | Ag66 Ag11 | 99.19(4)   |
| Ag10 Ag12 Ag11 | 63.98(3)  | Ag53 | Ag66 Ag18 | 86.77(4)   |
| Ag10 Ag12 Ag13 | 119.73(3) | Ag53 | Ag66 Ag38 | 72.01(4)   |
| Ag10 Ag12 Ag29 | 117.17(3) | Ag53 | Ag66 Ag42 | 53.39(3)   |
| Ag10 Ag12 Ag36 | 64.26(3)  | Ag53 | Ag66 Ag67 | 159.52(5)  |
| Ag10 Ag12 Ag37 | 64.29(3)  | Ag67 | Ag66 Ag11 | 63.30(3)   |
| Ag10 Ag12 Ag67 | 118.78(3) | S30  | Ag66 Ag11 | 150.41(10) |
| Ag10 Ag12 Ag68 | 155.94(3) | S30  | Ag66 Ag18 | 105.33(9)  |
| Ag10 Ag12 Ag69 | 118.33(3) | S30  | Ag66 Ag38 | 123.64(9)  |
| Ag11 Ag12 Ag5  | 113.46(3) | S30  | Ag66 Ag42 | 105.55(9)  |
| Ag11 Ag12 Ag13 | 65.10(3)  | S30  | Ag66 Ag53 | 56.92(9)   |
| Ag11 Ag12 Ag29 | 114.12(3) | S30  | Ag66 Ag67 | 143.06(10) |
| Ag11 Ag12 Ag36 | 119.05(3) | S30  | Ag66 S31  | 121.51(11) |

|                          |                          |
|--------------------------|--------------------------|
| Ag11 Ag12 Ag37 67.84(3)  | S30 Ag66 S37 138.45(11)  |
| Ag11 Ag12 Ag67 69.85(3)  | S31 Ag66 Ag11 61.93(7)   |
| Ag11 Ag12 Ag68 121.77(3) | S31 Ag66 Ag18 50.42(7)   |
| Ag11 Ag12 Ag69 176.85(3) | S31 Ag66 Ag38 111.37(8)  |
| Ag13 Ag12 Ag67 68.40(3)  | S31 Ag66 Ag42 94.31(8)   |
| Ag13 Ag12 Ag68 80.67(3)  | S31 Ag66 Ag53 136.69(9)  |
| Ag13 Ag12 Ag69 111.79(3) | S31 Ag66 Ag67 46.46(7)   |
| Ag29 Ag12 Ag13 60.63(3)  | S37 Ag66 Ag11 65.03(7)   |
| Ag29 Ag12 Ag67 117.19(3) | S37 Ag66 Ag18 115.53(8)  |
| Ag29 Ag12 Ag68 83.07(3)  | S37 Ag66 Ag38 49.61(7)   |
| Ag29 Ag12 Ag69 63.11(3)  | S37 Ag66 Ag42 95.07(8)   |
| Ag36 Ag12 Ag13 175.73(4) | S37 Ag66 Ag53 116.46(8)  |
| Ag36 Ag12 Ag29 116.70(3) | S37 Ag66 Ag67 48.06(7)   |
| Ag36 Ag12 Ag37 62.22(3)  | S37 Ag66 S31 91.64(10)   |
| Ag36 Ag12 Ag67 111.51(3) | Ag37 Ag67 Ag12 50.45(3)  |
| Ag36 Ag12 Ag68 95.83(3)  | Ag37 Ag67 Ag66 88.76(4)  |
| Ag36 Ag12 Ag69 64.07(3)  | Ag66 Ag67 Ag12 105.62(4) |
| Ag37 Ag12 Ag13 120.32(3) | Ag68 Ag67 Ag12 54.52(3)  |
| Ag37 Ag12 Ag29 177.85(4) | Ag68 Ag67 Ag37 87.15(4)  |
| Ag37 Ag12 Ag67 62.34(3)  | Ag68 Ag67 Ag66 155.76(6) |
| Ag37 Ag12 Ag68 95.14(3)  | S31 Ag67 Ag12 90.06(8)   |
| Ag37 Ag12 Ag69 114.90(3) | S31 Ag67 Ag37 113.44(8)  |
| Ag68 Ag12 Ag67 53.78(3)  | S31 Ag67 Ag66 48.05(7)   |
| Ag68 Ag12 Ag69 57.15(3)  | S31 Ag67 Ag68 112.81(8)  |
| Ag69 Ag12 Ag67 109.76(3) | S31 Ag67 S37 92.35(10)   |
| Ag9 Ag13 Ag11 55.36(2)   | S35 Ag67 Ag12 104.91(9)  |
| Ag9 Ag13 Ag12 55.37(2)   | S35 Ag67 Ag37 103.40(9)  |
| Ag9 Ag13 Ag14 54.79(3)   | S35 Ag67 Ag66 147.97(10) |
| Ag9 Ag13 Ag18 87.32(3)   | S35 Ag67 Ag68 55.83(9)   |
| Ag9 Ag13 Ag29 59.54(3)   | S35 Ag67 S31 141.19(11)  |
| Ag11 Ag13 Ag14 103.95(4) | S35 Ag67 S37 121.60(11)  |
| Ag11 Ag13 Ag18 57.51(2)  | S37 Ag67 Ag12 93.10(8)   |
| Ag12 Ag13 Ag11 54.64(2)  | S37 Ag67 Ag37 50.12(7)   |
| Ag12 Ag13 Ag14 102.66(4) | S37 Ag67 Ag66 47.22(7)   |
| Ag12 Ag13 Ag18 112.14(3) | S37 Ag67 Ag68 136.92(9)  |
| Ag12 Ag13 Ag29 59.56(2)  | Ag12 Ag68 Ag70 110.69(3) |
| Ag14 Ag13 Ag18 93.52(4)  | Ag67 Ag68 Ag12 71.69(4)  |
| Ag29 Ag13 Ag11 104.71(3) | Ag67 Ag68 Ag70 91.70(4)  |
| Ag29 Ag13 Ag14 59.61(3)  | Ag69 Ag68 Ag12 64.28(3)  |
| Ag29 Ag13 Ag18 145.11(4) | Ag69 Ag68 Ag67 134.02(5) |



|      |           |            |                |            |
|------|-----------|------------|----------------|------------|
| S2   | Ag13 Ag9  | 83.66(7)   | Ag69 Ag68 Ag70 | 91.75(4)   |
| S2   | Ag13 Ag11 | 98.58(7)   | S33 Ag68 Ag12  | 108.52(8)  |
| S2   | Ag13 Ag12 | 138.48(7)  | S33 Ag68 Ag67  | 142.97(7)  |
| S2   | Ag13 Ag14 | 48.72(7)   | S33 Ag68 Ag69  | 50.71(8)   |
| S2   | Ag13 Ag18 | 53.38(6)   | S33 Ag68 Ag70  | 52.67(7)   |
| S2   | Ag13 Ag29 | 107.93(7)  | S35 Ag68 Ag12  | 115.32(8)  |
| S2   | Ag13 S31  | 97.38(9)   | S35 Ag68 Ag67  | 50.00(8)   |
| S2   | Ag13 S36  | 129.70(9)  | S35 Ag68 Ag69  | 145.17(8)  |
| S31  | Ag13 Ag9  | 122.64(7)  | S35 Ag68 Ag70  | 54.66(8)   |
| S31  | Ag13 Ag11 | 67.97(6)   | S35 Ag68 S33   | 103.71(11) |
| S31  | Ag13 Ag12 | 99.41(6)   | S36 Ag68 Ag12  | 77.77(7)   |
| S31  | Ag13 Ag14 | 144.91(8)  | S36 Ag68 Ag67  | 97.09(8)   |
| S31  | Ag13 Ag18 | 52.64(7)   | S36 Ag68 Ag69  | 86.33(8)   |
| S31  | Ag13 Ag29 | 154.55(7)  | S36 Ag68 Ag70  | 169.46(8)  |
| S36  | Ag13 Ag9  | 112.24(8)  | S36 Ag68 S33   | 119.49(10) |
| S36  | Ag13 Ag11 | 130.29(7)  | S36 Ag68 S35   | 128.41(11) |
| S36  | Ag13 Ag12 | 78.29(6)   | Ag5 Ag69 Ag30  | 62.40(3)   |
| S36  | Ag13 Ag14 | 100.81(8)  | Ag12 Ag69 Ag5  | 51.40(3)   |
| S36  | Ag13 Ag18 | 160.08(8)  | Ag12 Ag69 Ag29 | 55.15(3)   |
| S36  | Ag13 Ag29 | 54.72(7)   | Ag12 Ag69 Ag30 | 113.52(4)  |
| S36  | Ag13 S31  | 110.20(10) | Ag12 Ag69 Ag36 | 53.46(3)   |
| Ag1  | Ag14 Ag13 | 109.12(4)  | Ag29 Ag69 Ag5  | 54.18(3)   |
| Ag1  | Ag14 Ag15 | 60.59(3)   | Ag29 Ag69 Ag30 | 92.24(4)   |
| Ag1  | Ag14 Ag29 | 109.57(4)  | Ag29 Ag69 Ag36 | 101.05(4)  |
| Ag9  | Ag14 Ag1  | 57.05(3)   | Ag36 Ag69 Ag5  | 57.49(3)   |
| Ag9  | Ag14 Ag13 | 59.59(3)   | Ag36 Ag69 Ag30 | 88.02(4)   |
| Ag9  | Ag14 Ag15 | 99.10(4)   | Ag68 Ag69 Ag5  | 109.19(5)  |
| Ag9  | Ag14 Ag29 | 60.59(3)   | Ag68 Ag69 Ag12 | 58.58(3)   |
| Ag15 | Ag14 Ag13 | 155.80(5)  | Ag68 Ag69 Ag29 | 79.55(4)   |
| Ag15 | Ag14 Ag29 | 102.76(5)  | Ag68 Ag69 Ag30 | 170.95(5)  |
| Ag29 | Ag14 Ag13 | 58.12(3)   | Ag68 Ag69 Ag36 | 89.83(4)   |
| S2   | Ag14 Ag1  | 99.00(8)   | S5 Ag69 Ag5    | 65.50(7)   |
| S2   | Ag14 Ag9  | 89.47(7)   | S5 Ag69 Ag12   | 103.16(8)  |
| S2   | Ag14 Ag13 | 52.33(7)   | S5 Ag69 Ag29   | 54.03(7)   |
| S2   | Ag14 Ag15 | 146.01(10) | S5 Ag69 Ag30   | 47.72(7)   |
| S2   | Ag14 Ag29 | 110.01(9)  | S5 Ag69 Ag36   | 119.91(8)  |
| S2   | Ag14 S4   | 156.48(12) | S5 Ag69 Ag68   | 127.13(8)  |
| S4   | Ag14 Ag1  | 103.27(9)  | S5 Ag69 S32    | 89.37(10)  |
| S4   | Ag14 Ag9  | 96.27(8)   | S32 Ag69 Ag5   | 65.08(7)   |
| S4   | Ag14 Ag13 | 111.96(9)  | S32 Ag69 Ag12  | 98.49(7)   |

|      |      |      |            |      |      |      |            |
|------|------|------|------------|------|------|------|------------|
| S4   | Ag14 | Ag15 | 55.43(9)   | S32  | Ag69 | Ag29 | 117.31(8)  |
| S4   | Ag14 | Ag29 | 55.07(8)   | S32  | Ag69 | Ag30 | 42.89(7)   |
| Ag1  | Ag15 | Ag8  | 53.00(2)   | S32  | Ag69 | Ag36 | 51.36(6)   |
| Ag1  | Ag15 | Ag16 | 56.04(3)   | S32  | Ag69 | Ag68 | 138.64(7)  |
| Ag1  | Ag15 | Ag17 | 57.0(3)    | S33  | Ag69 | Ag5  | 155.59(8)  |
| Ag1  | Ag15 | Ag27 | 99.01(3)   | S33  | Ag69 | Ag12 | 108.84(9)  |
| Ag8  | Ag15 | Ag17 | 101.6(3)   | S33  | Ag69 | Ag29 | 131.01(9)  |
| Ag8  | Ag15 | Ag27 | 51.16(3)   | S33  | Ag69 | Ag30 | 132.14(10) |
| Ag14 | Ag15 | Ag1  | 59.22(3)   | S33  | Ag69 | Ag36 | 100.18(7)  |
| Ag14 | Ag15 | Ag8  | 80.31(3)   | S33  | Ag69 | Ag68 | 56.91(9)   |
| Ag14 | Ag15 | Ag16 | 89.06(5)   | S33  | Ag69 | S5   | 138.71(11) |
| Ag14 | Ag15 | Ag27 | 125.03(5)  | S33  | Ag69 | S32  | 110.48(11) |
| Ag16 | Ag15 | Ag8  | 102.31(4)  | S33  | Ag70 | Ag68 | 54.30(8)   |
| Ag16 | Ag15 | Ag17 | 58.6(5)    | S33  | Ag70 | S34  | 94.01(10)  |
| Ag16 | Ag15 | Ag27 | 121.60(4)  | S33  | Ag70 | S35  | 103.56(11) |
| Ag17 | Ag15 | Ag27 | 152.7(3)   | S34  | Ag70 | Ag68 | 80.15(6)   |
| S1   | Ag15 | Ag1  | 86.26(9)   | S34  | Ag70 | S35  | 94.01(10)  |
| S1   | Ag15 | Ag8  | 138.58(9)  | S35  | Ag70 | Ag68 | 52.86(7)   |
| S1   | Ag15 | Ag14 | 71.15(11)  | P3   | Ag70 | Ag68 | 153.76(9)  |
| S1   | Ag15 | Ag16 | 49.31(10)  | P3   | Ag70 | S33  | 124.99(12) |
| S1   | Ag15 | Ag17 | 40.4(4)    | P3   | Ag70 | S34  | 124.20(10) |
| S1   | Ag15 | Ag27 | 163.40(12) | P3   | Ag70 | S35  | 110.46(12) |
| S3   | Ag15 | Ag1  | 94.24(8)   | S40  | Ag71 | Ag31 | 51.29(8)   |
| S3   | Ag15 | Ag8  | 75.54(7)   | S41  | Ag71 | Ag31 | 83.35(7)   |
| S3   | Ag15 | Ag14 | 151.86(7)  | S41  | Ag71 | S40  | 96.50(11)  |
| S3   | Ag15 | Ag16 | 82.27(10)  | S41  | Ag71 | S42  | 100.12(12) |
| S3   | Ag15 | Ag17 | 139.6(4)   | S42  | Ag71 | Ag31 | 53.90(8)   |
| S3   | Ag15 | Ag27 | 44.40(9)   | S42  | Ag71 | S40  | 99.72(12)  |
| S3   | Ag15 | S1   | 119.85(14) | P5   | Ag71 | Ag31 | 155.74(13) |
| S3   | Ag15 | S4   | 134.66(13) | P5   | Ag71 | S40  | 116.67(15) |
| S4   | Ag15 | Ag1  | 98.64(8)   | P5   | Ag71 | S41  | 120.62(15) |
| S4   | Ag15 | Ag8  | 78.21(7)   | P5   | Ag71 | S42  | 118.90(19) |
| S4   | Ag15 | Ag14 | 50.93(9)   | Ag16 | S1   | Ag15 | 76.76(14)  |
| S4   | Ag15 | Ag16 | 139.70(9)  | Ag17 | S1   | Ag15 | 86.0(7)    |
| S4   | Ag15 | Ag17 | 81.6(5)    | Ag17 | S1   | Ag16 | 86.3(6)    |
| S4   | Ag15 | Ag27 | 90.54(8)   | C1   | S1   | Ag15 | 109.0(5)   |
| S4   | Ag15 | S1   | 104.30(14) | C1   | S1   | Ag16 | 112.9(5)   |
| Ag1  | Ag16 | Ag15 | 60.26(3)   | C1   | S1   | Ag17 | 157.5(8)   |
| Ag1  | Ag16 | Ag17 | 59.6(4)    | Ag13 | S2   | Ag18 | 76.14(8)   |
| Ag17 | Ag16 | Ag15 | 62.2(5)    | Ag14 | S2   | Ag13 | 78.95(9)   |

|      |      |      |            |      |    |      |            |
|------|------|------|------------|------|----|------|------------|
| S1   | Ag16 | Ag1  | 92.38(10)  | Ag14 | S2 | Ag18 | 132.30(11) |
| S1   | Ag16 | Ag15 | 53.93(11)  | Ag17 | S2 | Ag13 | 122.9(7)   |
| S1   | Ag16 | Ag17 | 42.2(4)    | Ag17 | S2 | Ag18 | 134.0(5)   |
| S1   | Ag16 | S17  | 159.52(13) | C468 | S2 | Ag13 | 111.4(4)   |
| S17  | Ag16 | Ag1  | 106.28(8)  | C468 | S2 | Ag14 | 108.0(4)   |
| S17  | Ag16 | Ag15 | 129.03(10) | C468 | S2 | Ag17 | 94.2(6)    |
| S17  | Ag16 | Ag17 | 157.4(4)   | C468 | S2 | Ag18 | 118.8(4)   |
| Ag1  | Ag17 | Ag15 | 58.3(4)    | Ag15 | S3 | Ag26 | 147.31(12) |
| Ag1  | Ag17 | Ag16 | 56.6(4)    | Ag15 | S3 | Ag27 | 93.25(12)  |
| Ag16 | Ag17 | Ag15 | 59.2(4)    | Ag26 | S3 | Ag27 | 80.16(9)   |
| S1   | Ag17 | Ag1  | 97.3(8)    | C466 | S3 | Ag15 | 109.9(4)   |
| S1   | Ag17 | Ag15 | 53.6(6)    | C466 | S3 | Ag26 | 102.5(4)   |
| S1   | Ag17 | Ag16 | 51.5(5)    | C466 | S3 | Ag27 | 109.3(4)   |
| S1   | Ag17 | S2   | 163.2(10)  | Ag14 | S4 | Ag15 | 73.64(10)  |
| S2   | Ag17 | Ag1  | 98.6(6)    | Ag14 | S4 | Ag28 | 129.91(11) |
| S2   | Ag17 | Ag15 | 133.3(10)  | Ag14 | S4 | Ag29 | 75.29(10)  |
| S2   | Ag17 | Ag16 | 144.3(8)   | Ag15 | S4 | Ag28 | 95.82(11)  |
| Ag11 | Ag18 | Ag13 | 60.15(3)   | Ag15 | S4 | Ag29 | 132.75(12) |
| Ag11 | Ag18 | Ag43 | 111.19(4)  | Ag29 | S4 | Ag28 | 78.08(8)   |
| Ag11 | Ag18 | Ag66 | 67.07(3)   | C456 | S4 | Ag14 | 100.3(4)   |
| Ag13 | Ag18 | Ag66 | 95.71(3)   | C456 | S4 | Ag15 | 104.6(4)   |
| Ag19 | Ag18 | Ag11 | 62.24(3)   | C456 | S4 | Ag28 | 129.5(5)   |
| Ag19 | Ag18 | Ag13 | 88.00(3)   | C456 | S4 | Ag29 | 115.3(4)   |
| Ag19 | Ag18 | Ag42 | 57.77(2)   | Ag28 | S5 | Ag29 | 78.08(9)   |
| Ag19 | Ag18 | Ag43 | 63.55(4)   | Ag28 | S5 | Ag30 | 81.90(9)   |
| Ag19 | Ag18 | Ag66 | 118.31(3)  | Ag30 | S5 | Ag29 | 134.71(11) |
| Ag42 | Ag18 | Ag11 | 55.45(2)   | Ag69 | S5 | Ag28 | 134.57(12) |
| Ag42 | Ag18 | Ag13 | 115.27(3)  | Ag69 | S5 | Ag29 | 77.54(9)   |
| Ag42 | Ag18 | Ag43 | 61.13(3)   | Ag69 | S5 | Ag30 | 88.86(9)   |
| Ag42 | Ag18 | Ag66 | 65.54(3)   | C446 | S5 | Ag28 | 106.4(4)   |
| Ag43 | Ag18 | Ag13 | 148.94(4)  | C446 | S5 | Ag29 | 99.0(4)    |
| Ag43 | Ag18 | Ag66 | 108.31(4)  | C446 | S5 | Ag30 | 125.6(4)   |
| S2   | Ag18 | Ag11 | 98.48(6)   | C446 | S5 | Ag69 | 114.9(4)   |
| S2   | Ag18 | Ag13 | 50.48(7)   | Ag32 | S6 | Ag33 | 84.21(10)  |
| S2   | Ag18 | Ag19 | 77.26(7)   | Ag32 | S6 | Ag62 | 82.62(9)   |
| S2   | Ag18 | Ag42 | 134.32(7)  | Ag32 | S6 | Ag64 | 132.78(13) |
| S2   | Ag18 | Ag43 | 107.55(8)  | Ag33 | S6 | Ag62 | 136.21(12) |
| S2   | Ag18 | Ag66 | 144.11(8)  | Ag64 | S6 | Ag33 | 82.61(9)   |
| S2   | Ag18 | S31  | 96.01(9)   | Ag64 | S6 | Ag62 | 76.46(9)   |
| S29  | Ag18 | Ag11 | 140.23(7)  | C390 | S6 | Ag32 | 116.8(4)   |

|      |      |      |            |      |     |      |            |
|------|------|------|------------|------|-----|------|------------|
| S29  | Ag18 | Ag13 | 154.85(8)  | C390 | S6  | Ag33 | 95.6(4)    |
| S29  | Ag18 | Ag19 | 113.88(8)  | C390 | S6  | Ag62 | 127.5(4)   |
| S29  | Ag18 | Ag42 | 87.95(7)   | C390 | S6  | Ag64 | 109.5(4)   |
| S29  | Ag18 | Ag43 | 50.33(8)   | Ag34 | S7  | Ag35 | 71.32(8)   |
| S29  | Ag18 | Ag66 | 84.94(7)   | Ag34 | S7  | Ag36 | 129.80(11) |
| S29  | Ag18 | S2   | 119.93(9)  | Ag34 | S7  | Ag51 | 71.14(9)   |
| S29  | Ag18 | S31  | 112.45(11) | Ag35 | S7  | Ag36 | 76.31(8)   |
| S31  | Ag18 | Ag11 | 69.85(7)   | Ag51 | S7  | Ag35 | 129.92(12) |
| S31  | Ag18 | Ag13 | 53.92(7)   | Ag51 | S7  | Ag36 | 104.64(11) |
| S31  | Ag18 | Ag19 | 129.65(7)  | C370 | S7  | Ag34 | 103.6(4)   |
| S31  | Ag18 | Ag42 | 106.08(6)  | C370 | S7  | Ag35 | 113.7(5)   |
| S31  | Ag18 | Ag43 | 155.72(8)  | C370 | S7  | Ag36 | 124.4(5)   |
| S31  | Ag18 | Ag66 | 48.56(6)   | C370 | S7  | Ag51 | 106.4(4)   |
| Ag1  | Ag19 | Ag2  | 56.12(2)   | Ag37 | S8  | Ag38 | 78.46(8)   |
| Ag1  | Ag19 | Ag9  | 56.86(2)   | Ag51 | S8  | Ag37 | 109.63(12) |
| Ag1  | Ag19 | Ag11 | 112.39(3)  | Ag51 | S8  | Ag38 | 140.01(14) |
| Ag1  | Ag19 | Ag18 | 128.75(3)  | C360 | S8  | Ag37 | 123.9(4)   |
| Ag1  | Ag19 | Ag20 | 58.53(2)   | C360 | S8  | Ag38 | 113.2(4)   |
| Ag1  | Ag19 | Ag39 | 109.59(3)  | C360 | S8  | Ag51 | 94.9(4)    |
| Ag1  | Ag19 | Ag41 | 117.10(3)  | Ag20 | S9  | Ag19 | 63.32(7)   |
| Ag1  | Ag19 | Ag42 | 161.51(4)  | Ag43 | S9  | Ag19 | 71.60(10)  |
| Ag1  | Ag19 | Ag43 | 135.30(4)  | Ag43 | S9  | Ag20 | 121.42(11) |
| Ag1  | Ag19 | S9   | 88.19(7)   | Ag43 | S9  | Ag44 | 93.98(10)  |
| Ag2  | Ag19 | Ag11 | 83.24(3)   | Ag44 | S9  | Ag19 | 128.70(11) |
| Ag2  | Ag19 | Ag39 | 53.82(2)   | Ag44 | S9  | Ag20 | 86.96(12)  |
| Ag2  | Ag19 | Ag43 | 145.73(4)  | C350 | S9  | Ag19 | 114.9(4)   |
| Ag9  | Ag19 | Ag2  | 58.16(3)   | C350 | S9  | Ag20 | 118.6(4)   |
| Ag9  | Ag19 | Ag11 | 55.91(2)   | C350 | S9  | Ag43 | 113.1(4)   |
| Ag9  | Ag19 | Ag39 | 81.27(3)   | C350 | S9  | Ag44 | 116.0(4)   |
| Ag9  | Ag19 | Ag43 | 154.82(4)  | Ag47 | S10 | Ag50 | 118.19(10) |
| Ag11 | Ag19 | Ag39 | 53.99(2)   | Ag48 | S10 | Ag47 | 69.71(7)   |
| Ag11 | Ag19 | Ag43 | 109.41(3)  | Ag48 | S10 | Ag50 | 142.05(11) |
| Ag18 | Ag19 | Ag2  | 143.81(4)  | Ag49 | S10 | Ag47 | 135.33(11) |
| Ag18 | Ag19 | Ag9  | 93.05(3)   | Ag49 | S10 | Ag48 | 77.43(9)   |
| Ag18 | Ag19 | Ag11 | 61.38(3)   | Ag49 | S10 | Ag50 | 72.88(9)   |
| Ag18 | Ag19 | Ag20 | 155.99(4)  | C330 | S10 | Ag47 | 114.8(4)   |
| Ag18 | Ag19 | Ag39 | 104.40(3)  | C330 | S10 | Ag48 | 115.9(4)   |
| Ag18 | Ag19 | Ag41 | 113.76(3)  | C330 | S10 | Ag49 | 106.3(4)   |
| Ag18 | Ag19 | Ag43 | 62.05(3)   | C330 | S10 | Ag50 | 95.0(4)    |
| Ag18 | Ag19 | S9   | 100.61(8)  | Ag50 | S11 | Ag34 | 103.35(10) |

|                |           |          |      |            |
|----------------|-----------|----------|------|------------|
| Ag20 Ag19 Ag2  | 60.18(3)  | Ag50 S11 | Ag51 | 74.78(10)  |
| Ag20 Ag19 Ag9  | 107.16(3) | Ag51 S11 | Ag34 | 62.90(7)   |
| Ag20 Ag19 Ag11 | 141.38(3) | C11 S11  | Ag34 | 145.1(4)   |
| Ag20 Ag19 Ag39 | 91.64(3)  | C11 S11  | Ag50 | 111.3(4)   |
| Ag20 Ag19 Ag41 | 61.71(3)  | C11 S11  | Ag51 | 122.1(4)   |
| Ag20 Ag19 Ag43 | 96.41(4)  | Ag50 S12 | Ag52 | 124.69(13) |
| Ag41 Ag19 Ag2  | 78.81(3)  | Ag50 S12 | Ag55 | 112.82(12) |
| Ag41 Ag19 Ag9  | 131.74(3) | Ag52 S12 | Ag55 | 87.04(10)  |
| Ag41 Ag19 Ag11 | 101.71(3) | C320 S12 | Ag50 | 104.8(4)   |
| Ag41 Ag19 Ag39 | 54.32(2)  | C320 S12 | Ag52 | 113.5(5)   |
| Ag41 Ag19 Ag43 | 67.61(3)  | C320 S12 | Ag55 | 113.4(4)   |
| Ag42 Ag19 Ag2  | 106.02(3) | Ag38 S13 | Ag53 | 92.39(9)   |
| Ag42 Ag19 Ag9  | 111.50(3) | Ag52 S13 | Ag38 | 72.11(9)   |
| Ag42 Ag19 Ag11 | 56.20(2)  | Ag52 S13 | Ag53 | 108.00(11) |
| Ag42 Ag19 Ag18 | 61.68(3)  | C309 S13 | Ag38 | 123.5(4)   |
| Ag42 Ag19 Ag20 | 119.46(3) | C309 S13 | Ag52 | 113.7(4)   |
| Ag42 Ag19 Ag39 | 52.25(2)  | C309 S13 | Ag53 | 131.1(4)   |
| Ag42 Ag19 Ag41 | 57.76(2)  | Ag45 S14 | Ag52 | 140.12(11) |
| Ag42 Ag19 Ag43 | 61.69(3)  | Ag45 S14 | Ag55 | 90.30(10)  |
| Ag42 Ag19 S9   | 105.62(6) | Ag54 S14 | Ag45 | 83.10(9)   |
| Ag43 Ag19 Ag39 | 107.28(3) | Ag54 S14 | Ag52 | 82.11(10)  |
| S9 Ag19 Ag2    | 115.58(8) | Ag54 S14 | Ag55 | 140.19(12) |
| S9 Ag19 Ag9    | 142.60(6) | Ag55 S14 | Ag52 | 78.20(9)   |
| S9 Ag19 Ag11   | 158.23(7) | C168 S14 | Ag45 | 121.5(4)   |
| S9 Ag19 Ag20   | 55.41(8)  | C168 S14 | Ag52 | 98.4(4)    |
| S9 Ag19 Ag39   | 127.30(7) | C168 S14 | Ag54 | 111.8(4)   |
| S9 Ag19 Ag41   | 73.23(6)  | C168 S14 | Ag55 | 105.1(4)   |
| S9 Ag19 Ag43   | 48.88(7)  | Ag55 S15 | Ag47 | 69.18(8)   |
| Ag1 Ag20 Ag2   | 56.37(2)  | Ag55 S15 | Ag56 | 106.99(10) |
| Ag1 Ag20 Ag19  | 58.25(2)  | Ag56 S15 | Ag47 | 90.74(8)   |
| Ag1 Ag20 Ag21  | 56.63(2)  | C158 S15 | Ag47 | 133.0(3)   |
| Ag1 Ag20 Ag22  | 112.10(3) | C158 S15 | Ag55 | 112.4(3)   |
| Ag1 Ag20 Ag40  | 108.66(3) | C158 S15 | Ag56 | 128.8(3)   |
| Ag1 Ag20 Ag41  | 114.69(3) | Ag57 S16 | Ag25 | 142.37(13) |
| Ag1 Ag20 Ag46  | 159.68(4) | Ag57 S16 | Ag58 | 87.46(9)   |
| Ag1 Ag20 Ag58  | 130.79(3) | Ag58 S16 | Ag25 | 76.10(9)   |
| Ag2 Ag20 Ag21  | 58.21(3)  | Ag60 S16 | Ag25 | 84.85(10)  |
| Ag2 Ag20 Ag40  | 52.31(2)  | Ag60 S16 | Ag57 | 86.19(9)   |
| Ag2 Ag20 Ag41  | 78.21(3)  | Ag60 S16 | Ag58 | 139.18(14) |
| Ag19 Ag20 Ag2  | 61.14(3)  | C149 S16 | Ag25 | 101.1(4)   |

|                          |                          |
|--------------------------|--------------------------|
| Ag19 Ag20 Ag21 107.29(3) | C149 S16 Ag57 116.3(4)   |
| Ag19 Ag20 Ag22 137.13(4) | C149 S16 Ag58 109.0(4)   |
| Ag19 Ag20 Ag40 88.04(3)  | C149 S16 Ag60 110.0(4)   |
| Ag19 Ag20 Ag41 59.44(2)  | Ag16 S17 Ag25 121.30(14) |
| Ag21 Ag20 Ag40 84.78(3)  | Ag16 S17 Ag58 123.28(13) |
| Ag22 Ag20 Ag2 78.72(3)   | Ag25 S17 Ag58 79.67(9)   |
| Ag22 Ag20 Ag21 56.83(3)  | C22 S17 Ag16 101.2(4)    |
| Ag22 Ag20 Ag40 53.54(2)  | C22 S17 Ag25 108.7(4)    |
| Ag22 Ag20 Ag41 100.10(3) | C22 S17 Ag58 122.2(4)    |
| Ag41 Ag20 Ag21 132.69(3) | Ag44 S18 Ag58 88.56(12)  |
| Ag41 Ag20 Ag40 51.99(2)  | Ag44 S18 Ag59 111.41(12) |
| Ag46 Ag20 Ag2 103.37(3)  | Ag58 S18 Ag59 129.16(12) |
| Ag46 Ag20 Ag19 116.03(3) | C67 S18 Ag44 104.1(4)    |
| Ag46 Ag20 Ag21 113.55(3) | C67 S18 Ag58 109.0(4)    |
| Ag46 Ag20 Ag22 57.01(2)  | C67 S18 Ag59 110.3(4)    |
| Ag46 Ag20 Ag40 51.07(2)  | Ag45 S19 Ag56 72.10(9)   |
| Ag46 Ag20 Ag41 56.61(2)  | Ag45 S19 Ag59 122.43(13) |
| Ag46 Ag20 Ag58 62.93(3)  | Ag56 S19 Ag59 74.96(9)   |
| Ag58 Ag20 Ag2 141.43(4)  | C30 S19 Ag45 112.1(5)    |
| Ag58 Ag20 Ag19 157.20(4) | C30 S19 Ag56 103.5(5)    |
| Ag58 Ag20 Ag21 92.70(3)  | C30 S19 Ag59 120.7(5)    |
| Ag58 Ag20 Ag22 63.47(3)  | Ag57 S20 Ag56 69.94(9)   |
| Ag58 Ag20 Ag40 104.98(3) | Ag57 S20 Ag59 123.57(13) |
| Ag58 Ag20 Ag41 114.23(3) | Ag59 S20 Ag56 76.00(10)  |
| S9 Ag20 Ag1 91.61(8)     | C39 S20 Ag56 95.4(5)     |
| S9 Ag20 Ag2 122.39(9)    | C39 S20 Ag57 113.5(5)    |
| S9 Ag20 Ag19 61.27(9)    | C39 S20 Ag59 113.2(5)    |
| S9 Ag20 Ag21 143.10(7)   | Ag26 S21 Ag27 74.54(9)   |
| S9 Ag20 Ag22 155.30(9)   | Ag32 S21 Ag26 127.02(12) |
| S9 Ag20 Ag40 126.64(7)   | Ag32 S21 Ag27 79.39(10)  |
| S9 Ag20 Ag41 74.66(7)    | Ag62 S21 Ag26 80.52(10)  |
| S9 Ag20 Ag46 102.32(7)   | Ag62 S21 Ag27 136.54(12) |
| S9 Ag20 Ag58 96.15(9)    | Ag62 S21 Ag32 88.36(11)  |
| Ag1 Ag21 Ag2 57.44(2)    | C77 S21 Ag26 116.3(4)    |
| Ag1 Ag21 Ag7 116.38(4)   | C77 S21 Ag27 117.8(4)    |
| Ag1 Ag21 Ag8 56.93(2)    | C77 S21 Ag32 116.7(4)    |
| Ag1 Ag21 Ag20 57.74(2)   | C77 S21 Ag62 105.1(4)    |
| Ag1 Ag21 Ag22 116.64(3)  | Ag61 S22 Ag63 70.96(9)   |
| Ag1 Ag21 Ag23 115.33(3)  | Ag62 S22 Ag61 71.49(11)  |
| Ag1 Ag21 Ag24 168.88(4)  | Ag62 S22 Ag63 124.25(14) |

|                          |                          |
|--------------------------|--------------------------|
| Ag1 Ag21 Ag25 124.39(4)  | C119 S22 Ag61 93.6(5)    |
| Ag1 Ag21 Ag26 129.16(3)  | C119 S22 Ag62 111.6(5)   |
| Ag2 Ag21 Ag7 88.67(3)    | C119 S22 Ag63 110.5(5)   |
| Ag2 Ag21 Ag8 63.57(3)    | Ag48 S23 Ag63 129.29(13) |
| Ag2 Ag21 Ag20 60.22(3)   | Ag48 S23 Ag64 77.07(8)   |
| Ag2 Ag21 Ag23 58.21(2)   | Ag64 S23 Ag63 117.02(10) |
| Ag2 Ag21 Ag25 147.79(4)  | C87 S23 Ag48 112.8(4)    |
| Ag7 Ag21 Ag8 59.92(3)    | C87 S23 Ag63 103.8(4)    |
| Ag7 Ag21 Ag20 147.02(3)  | C87 S23 Ag64 115.7(4)    |
| Ag7 Ag21 Ag23 56.31(2)   | Ag60 S24 Ag61 68.67(10)  |
| Ag7 Ag21 Ag25 112.55(4)  | Ag60 S24 Ag63 121.13(16) |
| Ag8 Ag21 Ag20 109.01(3)  | Ag63 S24 Ag61 71.70(10)  |
| Ag8 Ag21 Ag23 89.37(3)   | C97 S24 Ag60 110.4(4)    |
| Ag8 Ag21 Ag25 147.88(4)  | C97 S24 Ag61 103.9(3)    |
| Ag20 Ag21 Ag23 94.99(3)  | C97 S24 Ag63 120.3(4)    |
| Ag22 Ag21 Ag2 81.53(3)   | Ag25 S25 Ag26 70.40(8)   |
| Ag22 Ag21 Ag7 107.50(3)  | Ag25 S25 Ag61 108.14(10) |
| Ag22 Ag21 Ag8 142.05(3)  | Ag61 S25 Ag26 96.08(10)  |
| Ag22 Ag21 Ag20 60.38(3)  | C129 S25 Ag25 119.9(5)   |
| Ag22 Ag21 Ag23 58.11(2)  | C129 S25 Ag26 128.4(4)   |
| Ag22 Ag21 Ag25 69.35(3)  | C129 S25 Ag61 121.9(4)   |
| Ag22 Ag21 Ag26 111.51(4) | Ag47 S26 Ag48 71.31(8)   |
| Ag24 Ag21 Ag2 111.45(3)  | Ag47 S26 Ag60 121.68(11) |
| Ag24 Ag21 Ag7 59.71(3)   | Ag48 S26 Ag60 83.29(9)   |
| Ag24 Ag21 Ag8 119.51(3)  | Ag57 S26 Ag47 78.39(9)   |
| Ag24 Ag21 Ag20 118.95(3) | Ag57 S26 Ag48 132.02(12) |
| Ag24 Ag21 Ag22 58.59(3)  | Ag57 S26 Ag60 82.06(8)   |
| Ag24 Ag21 Ag23 53.57(2)  | C139 S26 Ag47 106.6(4)   |
| Ag24 Ag21 Ag25 64.84(3)  | C139 S26 Ag48 112.3(4)   |
| Ag24 Ag21 Ag26 59.48(3)  | C139 S26 Ag57 111.5(5)   |
| Ag25 Ag21 Ag20 92.50(3)  | C139 S26 Ag60 131.7(5)   |
| Ag25 Ag21 Ag23 112.86(3) | Ag43 S27 Ag45 124.61(13) |
| Ag26 Ag21 Ag2 148.26(4)  | Ag43 S27 Ag54 74.11(9)   |
| Ag26 Ag21 Ag7 60.09(3)   | Ag44 S27 Ag43 95.86(11)  |
| Ag26 Ag21 Ag8 93.28(3)   | Ag44 S27 Ag45 69.10(9)   |
| Ag26 Ag21 Ag20 151.50(4) | Ag44 S27 Ag54 129.15(14) |
| Ag26 Ag21 Ag23 103.00(3) | Ag54 S27 Ag45 76.46(9)   |
| Ag26 Ag21 Ag25 60.25(3)  | C176 S27 Ag43 124.8(4)   |
| Ag20 Ag22 Ag25 87.26(3)  | C176 S27 Ag44 123.2(4)   |
| Ag20 Ag22 Ag47 115.01(3) | C176 S27 Ag45 106.3(4)   |

|                          |                          |
|--------------------------|--------------------------|
| Ag20 Ag22 Ag48 154.23(4) | C176 S27 Ag54 101.4(4)   |
| Ag20 Ag22 Ag57 112.79(3) | Ag54 S28 Ag53 69.53(8)   |
| Ag20 Ag22 Ag58 56.87(3)  | Ag54 S28 Ag65 115.96(11) |
| Ag20 Ag22 Ag60 143.08(3) | Ag65 S28 Ag53 71.46(9)   |
| Ag21 Ag22 Ag20 62.79(3)  | C303 S28 Ag53 99.9(5)    |
| Ag21 Ag22 Ag23 66.49(3)  | C303 S28 Ag54 121.9(5)   |
| Ag21 Ag22 Ag25 57.17(3)  | C303 S28 Ag65 113.3(5)   |
| Ag21 Ag22 Ag40 99.01(3)  | Ag18 S29 Ag65 135.66(12) |
| Ag21 Ag22 Ag47 153.52(4) | Ag43 S29 Ag18 76.79(9)   |
| Ag21 Ag22 Ag48 111.82(3) | Ag43 S29 Ag65 110.41(12) |
| Ag21 Ag22 Ag57 149.87(3) | C186 S29 Ag18 112.0(5)   |
| Ag21 Ag22 Ag58 92.29(3)  | C186 S29 Ag43 112.3(5)   |
| Ag21 Ag22 Ag60 107.24(4) | C186 S29 Ag65 105.4(5)   |
| Ag23 Ag22 Ag20 101.66(3) | Ag53 S30 Ag65 68.21(9)   |
| Ag23 Ag22 Ag25 109.94(3) | Ag66 S30 Ag53 71.44(10)  |
| Ag23 Ag22 Ag40 61.41(3)  | Ag66 S30 Ag65 116.58(14) |
| Ag23 Ag22 Ag47 89.43(3)  | C276 S30 Ag53 100.0(4)   |
| Ag23 Ag22 Ag48 56.18(3)  | C276 S30 Ag65 124.6(4)   |
| Ag23 Ag22 Ag57 139.01(3) | C276 S30 Ag66 108.8(5)   |
| Ag23 Ag22 Ag58 156.11(4) | Ag18 S31 Ag13 73.45(8)   |
| Ag23 Ag22 Ag60 106.08(3) | Ag66 S31 Ag13 136.06(12) |
| Ag24 Ag22 Ag20 123.16(3) | Ag66 S31 Ag18 81.02(9)   |
| Ag24 Ag22 Ag21 60.41(3)  | Ag67 S31 Ag13 90.57(11)  |
| Ag24 Ag22 Ag23 56.81(3)  | Ag67 S31 Ag18 138.56(12) |
| Ag24 Ag22 Ag25 60.75(3)  | Ag67 S31 Ag66 85.48(9)   |
| Ag24 Ag22 Ag40 118.07(3) | C266 S31 Ag13 105.6(4)   |
| Ag24 Ag22 Ag47 116.28(3) | C266 S31 Ag18 105.9(4)   |
| Ag24 Ag22 Ag48 58.88(2)  | C266 S31 Ag66 115.6(4)   |
| Ag24 Ag22 Ag57 114.79(3) | C266 S31 Ag67 115.2(4)   |
| Ag24 Ag22 Ag58 123.20(3) | Ag30 S32 Ag35 84.65(10)  |
| Ag24 Ag22 Ag60 58.59(3)  | Ag30 S32 Ag36 140.10(13) |
| Ag25 Ag22 Ag48 111.51(3) | Ag30 S32 Ag69 89.25(9)   |
| Ag25 Ag22 Ag57 93.70(3)  | Ag35 S32 Ag36 77.88(9)   |
| Ag25 Ag22 Ag60 60.69(3)  | Ag35 S32 Ag69 129.73(12) |
| Ag40 Ag22 Ag20 72.42(3)  | Ag36 S32 Ag69 75.58(8)   |
| Ag40 Ag22 Ag25 154.57(4) | C192 S32 Ag30 108.9(4)   |
| Ag40 Ag22 Ag47 57.85(3)  | C192 S32 Ag35 107.7(4)   |
| Ag40 Ag22 Ag48 84.29(3)  | C192 S32 Ag36 110.5(4)   |
| Ag40 Ag22 Ag57 108.01(3) | C192 S32 Ag69 121.4(4)   |
| Ag40 Ag22 Ag58 114.60(3) | Ag69 S33 Ag68 72.38(10)  |



|                          |                          |
|--------------------------|--------------------------|
| Ag40 Ag22 Ag60 143.10(3) | Ag69 S33 Ag70 121.73(13) |
| Ag46 Ag22 Ag20 58.78(3)  | Ag70 S33 Ag68 73.03(9)   |
| Ag46 Ag22 Ag21 121.24(4) | C236 S33 Ag68 98.2(5)    |
| Ag46 Ag22 Ag23 119.72(3) | C236 S33 Ag69 112.3(5)   |
| Ag46 Ag22 Ag24 175.83(4) | C236 S33 Ag70 117.8(5)   |
| Ag46 Ag22 Ag25 123.42(3) | Ag36 S34 Ag37 72.79(8)   |
| Ag46 Ag22 Ag40 58.34(3)  | Ag36 S34 Ag70 127.67(11) |
| Ag46 Ag22 Ag47 60.36(3)  | Ag37 S34 Ag70 132.57(12) |
| Ag46 Ag22 Ag48 117.59(3) | C202 S34 Ag36 113.2(3)   |
| Ag46 Ag22 Ag57 65.94(3)  | C202 S34 Ag37 106.6(3)   |
| Ag46 Ag22 Ag58 60.96(3)  | C202 S34 Ag70 101.9(3)   |
| Ag46 Ag22 Ag60 122.57(4) | Ag67 S35 Ag68 74.18(10)  |
| Ag47 Ag22 Ag25 147.42(4) | Ag67 S35 Ag70 120.50(14) |
| Ag47 Ag22 Ag48 57.46(3)  | Ag68 S35 Ag70 72.48(10)  |
| Ag47 Ag22 Ag57 56.62(3)  | C208 S35 Ag67 112.4(5)   |
| Ag47 Ag22 Ag58 108.52(4) | C208 S35 Ag68 96.8(5)    |
| Ag47 Ag22 Ag60 89.36(3)  | C208 S35 Ag70 119.3(5)   |
| Ag48 Ag22 Ag57 84.44(3)  | Ag13 S36 Ag29 71.93(8)   |
| Ag48 Ag22 Ag60 62.23(3)  | Ag68 S36 Ag13 100.53(9)  |
| Ag58 Ag22 Ag25 62.62(3)  | Ag68 S36 Ag29 102.52(10) |
| Ag58 Ag22 Ag48 147.19(4) | C246 S36 Ag13 122.0(4)   |
| Ag58 Ag22 Ag57 64.68(3)  | C246 S36 Ag29 124.5(4)   |
| Ag58 Ag22 Ag60 90.17(3)  | C246 S36 Ag68 122.9(4)   |
| Ag60 Ag22 Ag57 56.75(3)  | Ag38 S37 Ag37 76.50(9)   |
| Ag2 Ag23 Ag21 56.72(2)   | Ag66 S37 Ag37 135.19(12) |
| Ag2 Ag23 Ag40 57.78(2)   | Ag66 S37 Ag38 83.01(10)  |
| Ag2 Ag23 Ag64 149.59(4)  | Ag66 S37 Ag67 84.71(9)   |
| Ag3 Ag23 Ag2 58.34(2)    | Ag67 S37 Ag37 81.31(9)   |
| Ag3 Ag23 Ag4 57.78(2)    | Ag67 S37 Ag38 133.29(12) |
| Ag3 Ag23 Ag7 116.85(3)   | C256 S37 Ag37 104.0(4)   |
| Ag3 Ag23 Ag21 114.87(3)  | C256 S37 Ag38 107.7(4)   |
| Ag3 Ag23 Ag22 115.97(3)  | C256 S37 Ag66 120.2(4)   |
| Ag3 Ag23 Ag40 57.83(3)   | C256 S37 Ag67 117.3(4)   |
| Ag3 Ag23 Ag48 121.29(3)  | Ag33 S38 Ag64 72.59(7)   |
| Ag3 Ag23 Ag49 69.52(3)   | Ag34 S38 Ag33 71.85(8)   |
| Ag3 Ag23 Ag64 129.61(4)  | Ag34 S38 Ag64 121.49(11) |
| Ag4 Ag23 Ag2 61.60(3)    | Ag49 S38 Ag33 122.77(12) |
| Ag4 Ag23 Ag21 87.31(3)   | Ag49 S38 Ag34 83.22(11)  |
| Ag4 Ag23 Ag40 107.01(3)  | Ag49 S38 Ag64 78.90(10)  |
| Ag4 Ag23 Ag48 153.95(4)  | C340 S38 Ag33 125.4(5)   |

|                          |                          |
|--------------------------|--------------------------|
| Ag4 Ag23 Ag49 94.03(3)   | C340 S38 Ag34 100.0(5)   |
| Ag4 Ag23 Ag64 96.33(3)   | C340 S38 Ag49 108.8(5)   |
| Ag7 Ag23 Ag2 88.92(3)    | C340 S38 Ag64 138.5(5)   |
| Ag7 Ag23 Ag4 59.18(3)    | Ag31 S39 Ag33 97.73(11)  |
| Ag7 Ag23 Ag21 58.21(2)   | Ag35 S39 Ag31 100.96(10) |
| Ag7 Ag23 Ag22 106.79(3)  | Ag35 S39 Ag33 70.68(8)   |
| Ag7 Ag23 Ag40 144.72(3)  | C380 S39 Ag31 127.4(4)   |
| Ag7 Ag23 Ag48 116.49(3)  | C380 S39 Ag33 124.8(4)   |
| Ag7 Ag23 Ag49 118.82(4)  | C380 S39 Ag35 120.0(4)   |
| Ag7 Ag23 Ag64 60.94(3)   | Ag31 S40 Ag71 73.90(11)  |
| Ag22 Ag23 Ag2 79.25(3)   | Ag32 S40 Ag31 72.24(9)   |
| Ag22 Ag23 Ag4 137.31(3)  | Ag32 S40 Ag71 119.59(14) |
| Ag22 Ag23 Ag21 55.40(2)  | C436 S40 Ag31 106.0(4)   |
| Ag22 Ag23 Ag40 59.32(3)  | C436 S40 Ag32 111.3(4)   |
| Ag22 Ag23 Ag48 68.41(3)  | C436 S40 Ag71 125.4(4)   |
| Ag22 Ag23 Ag49 124.91(4) | Ag27 S41 Ag71 130.00(14) |
| Ag22 Ag23 Ag64 111.66(4) | Ag28 S41 Ag27 73.86(9)   |
| Ag24 Ag23 Ag2 113.17(3)  | Ag28 S41 Ag71 121.28(14) |
| Ag24 Ag23 Ag3 171.44(4)  | C400 S41 Ag27 110.8(4)   |
| Ag24 Ag23 Ag4 120.61(3)  | C400 S41 Ag28 113.1(4)   |
| Ag24 Ag23 Ag7 61.68(3)   | C400 S41 Ag71 105.2(4)   |
| Ag24 Ag23 Ag21 56.79(2)  | Ag30 S42 Ag31 70.38(10)  |
| Ag24 Ag23 Ag22 58.67(3)  | Ag30 S42 Ag71 123.04(16) |
| Ag24 Ag23 Ag40 117.83(4) | Ag71 S42 Ag31 73.84(11)  |
| Ag24 Ag23 Ag48 64.30(3)  | C409 S42 Ag30 112.5(5)   |
| Ag24 Ag23 Ag49 118.88(4) | C409 S42 Ag31 91.8(4)    |
| Ag24 Ag23 Ag64 58.00(3)  | C409 S42 Ag71 111.4(5)   |
| Ag40 Ag23 Ag21 90.91(3)  | C49 P1 Ag59 111.1(5)     |
| Ag40 Ag23 Ag64 152.45(4) | C49 P1 C61 106.2(7)      |
| Ag48 Ag23 Ag2 143.14(4)  | C55 P1 Ag59 118.0(6)     |
| Ag48 Ag23 Ag21 112.81(3) | C55 P1 C49 104.2(7)      |
| Ag48 Ag23 Ag40 89.72(3)  | C55 P1 C61 102.8(7)      |
| Ag48 Ag23 Ag64 63.49(3)  | C61 P1 Ag59 113.5(5)     |
| Ag49 Ag23 Ag2 127.78(4)  | C107 P2 Ag63 111.6(4)    |
| Ag49 Ag23 Ag21 175.31(4) | C107 P2 C113 104.7(6)    |
| Ag49 Ag23 Ag40 92.99(3)  | C113 P2 Ag63 113.5(4)    |
| Ag49 Ag23 Ag48 64.65(3)  | C8AA P2 Ag63 117.4(4)    |
| Ag49 Ag23 Ag64 70.51(4)  | C8AA P2 C107 105.9(5)    |
| Ag64 Ag23 Ag21 104.89(3) | C8AA P2 C113 102.5(6)    |
| Ag7 Ag24 Ag25 110.72(3)  | C218 P3 Ag70 113.8(4)    |

|                          |         |               |
|--------------------------|---------|---------------|
| Ag7 Ag24 Ag48 114.77(3)  | C218 P3 | C230 102.4(6) |
| Ag7 Ag24 Ag60 173.39(4)  | C224 P3 | Ag70 116.8(4) |
| Ag7 Ag24 Ag61 119.26(4)  | C224 P3 | C218 103.3(5) |
| Ag7 Ag24 Ag62 67.69(3)   | C224 P3 | C230 104.5(5) |
| Ag21 Ag24 Ag7 62.42(3)   | C230 P3 | Ag70 114.3(4) |
| Ag21 Ag24 Ag25 59.86(3)  | C285 P4 | Ag65 114.0(5) |
| Ag21 Ag24 Ag26 61.75(3)  | C285 P4 | C297 105.1(6) |
| Ag21 Ag24 Ag48 121.30(3) | C291 P4 | Ag65 117.1(5) |
| Ag21 Ag24 Ag60 119.53(4) | C291 P4 | C285 101.3(7) |
| Ag21 Ag24 Ag61 138.96(3) | C291 P4 | C297 106.7(6) |
| Ag21 Ag24 Ag62 115.23(3) | C297 P4 | Ag65 111.4(4) |
| Ag22 Ag24 Ag7 111.60(3)  | C418 P5 | Ag71 117.7(6) |
| Ag22 Ag24 Ag21 61.00(3)  | C424 P5 | Ag71 112.3(5) |
| Ag22 Ag24 Ag25 68.18(3)  | C424 P5 | C418 103.9(7) |
| Ag22 Ag24 Ag26 115.60(3) | C430 P5 | Ag71 111.1(6) |
| Ag22 Ag24 Ag48 69.45(3)  | C430 P5 | C418 99.4(8)  |
| Ag22 Ag24 Ag60 73.93(3)  | C430 P5 | C424 111.5(8) |
| Ag22 Ag24 Ag61 128.30(4) | C2 C1   | S1 123.2(14)  |
| Ag22 Ag24 Ag62 174.92(4) | C2 C1   | C6 120.9(18)  |
| Ag22 Ag24 Ag64 124.84(3) | C6 C1   | S1 115.9(14)  |
| Ag23 Ag24 Ag7 62.20(3)   | C1 C2   | C3 121(2)     |
| Ag23 Ag24 Ag21 69.63(3)  | C4 C3   | C2 119(2)     |
| Ag23 Ag24 Ag22 64.53(3)  | C3 C4   | C7 115.8(17)  |
| Ag23 Ag24 Ag25 122.59(3) | C5 C4   | C3 115.8(17)  |
| Ag23 Ag24 Ag26 117.55(3) | C5 C4   | C7 128.3(18)  |
| Ag23 Ag24 Ag48 61.71(3)  | C4 C5   | C6 123.8(19)  |
| Ag23 Ag24 Ag60 124.32(3) | C1 C6   | C5 120(2)     |
| Ag23 Ag24 Ag61 150.75(4) | C4 C7   | C9 116.6(16)  |
| Ag23 Ag24 Ag62 118.15(4) | C8 C7   | C4 120.3(16)  |
| Ag23 Ag24 Ag64 66.98(3)  | C8 C7   | C9 98.3(12)   |
| Ag25 Ag24 Ag60 67.40(3)  | C10 C7  | C4 122.5(17)  |
| Ag25 Ag24 Ag62 107.15(3) | C10 C7  | C8 103.0(12)  |
| Ag26 Ag24 Ag7 61.72(3)   | C10 C7  | C9 89.9(9)    |
| Ag26 Ag24 Ag25 59.24(3)  | C12 C11 | S11 118.9(7)  |
| Ag26 Ag24 Ag48 174.41(4) | C12 C11 | C16 120.0     |
| Ag26 Ag24 Ag60 112.98(4) | C16 C11 | S11 121.0(7)  |
| Ag26 Ag24 Ag61 82.61(3)  | C13 C12 | C11 120.0     |
| Ag26 Ag24 Ag62 59.45(3)  | C12 C13 | C14 120.0     |
| Ag48 Ag24 Ag25 126.17(4) | C13 C14 | C17 115.0(13) |
| Ag48 Ag24 Ag60 70.16(3)  | C15 C14 | C13 120.0     |

|                          |                        |
|--------------------------|------------------------|
| Ag48 Ag24 Ag62 115.54(3) | C15 C14 C17 124.8(13)  |
| Ag60 Ag24 Ag62 106.47(3) | C14 C15 C16 120.0      |
| Ag61 Ag24 Ag25 85.39(3)  | C15 C16 C11 120.0      |
| Ag61 Ag24 Ag48 96.07(3)  | C14 C17 C19 117.4(19)  |
| Ag61 Ag24 Ag60 54.75(3)  | C14 C17 C496 115.4(19) |
| Ag61 Ag24 Ag62 51.73(3)  | C18 C17 C14 109(2)     |
| Ag64 Ag24 Ag7 64.03(3)   | C18 C17 C19 89.4(19)   |
| Ag64 Ag24 Ag21 121.95(4) | C18 C17 C496 102(2)    |
| Ag64 Ag24 Ag25 166.76(4) | C496 C17 C19 118(2)    |
| Ag64 Ag24 Ag26 108.98(4) | C23 C22 S17 123.1(10)  |
| Ag64 Ag24 Ag48 65.48(3)  | C23 C22 C27 119.3(13)  |
| Ag64 Ag24 Ag60 116.30(4) | C27 C22 S17 117.6(11)  |
| Ag64 Ag24 Ag61 87.06(4)  | C22 C23 C24 118.2(14)  |
| Ag64 Ag24 Ag62 59.74(3)  | C25 C24 C23 123.6(16)  |
| Ag21 Ag25 Ag22 53.47(3)  | C24 C25 C26 116.9(16)  |
| Ag21 Ag25 Ag24 55.31(3)  | C24 C25 C28 122.9(15)  |
| Ag21 Ag25 Ag58 85.06(3)  | C26 C25 C28 120.2(16)  |
| Ag21 Ag25 Ag60 107.01(4) | C27 C26 C25 124.6(19)  |
| Ag22 Ag25 Ag58 55.00(3)  | C26 C27 C22 117.1(17)  |
| Ag22 Ag25 Ag60 63.98(3)  | C29 C28 C25 112.6(15)  |
| Ag24 Ag25 Ag22 51.07(2)  | C29 C28 C495 99.5(16)  |
| Ag24 Ag25 Ag58 105.95(4) | C29 C28 C4BA 132.7(18) |
| Ag24 Ag25 Ag60 57.67(3)  | C495 C28 C25 111.5(16) |
| Ag26 Ag25 Ag21 58.85(3)  | C4BA C28 C25 107.7(15) |
| Ag26 Ag25 Ag22 98.67(4)  | C4BA C28 C495 87.5(16) |
| Ag26 Ag25 Ag24 55.93(3)  | C31 C30 S19 121.8(12)  |
| Ag26 Ag25 Ag58 143.90(4) | C31 C30 C35 118.7(15)  |
| Ag26 Ag25 Ag60 102.61(4) | C35 C30 S19 119.1(11)  |
| Ag58 Ag25 Ag60 88.01(4)  | C30 C31 C32 120.9(19)  |
| S16 Ag25 Ag21 116.87(7)  | C31 C32 C33 122(2)     |
| S16 Ag25 Ag22 63.97(7)   | C32 C33 C36 120.5(18)  |
| S16 Ag25 Ag24 92.53(7)   | C34 C33 C32 113.5(17)  |
| S16 Ag25 Ag26 145.73(8)  | C34 C33 C36 125.9(17)  |
| S16 Ag25 Ag58 50.20(7)   | C35 C34 C33 125.7(18)  |
| S16 Ag25 Ag60 43.74(7)   | C34 C35 C30 119.3(16)  |
| S17 Ag25 Ag21 83.59(8)   | C33 C36 C37 114.4(18)  |
| S17 Ag25 Ag22 95.72(7)   | C33 C36 C38 114(2)     |
| S17 Ag25 Ag24 136.83(8)  | C38 C36 C37 111(2)     |
| S17 Ag25 Ag26 116.38(9)  | C497 C36 C33 110(2)    |
| S17 Ag25 Ag58 52.47(7)   | C497 C36 C37 109.6(19) |

|      |      |      |            |      |     |     |           |
|------|------|------|------------|------|-----|-----|-----------|
| S17  | Ag25 | Ag60 | 138.69(8)  | C497 | C36 | C38 | 96(2)     |
| S17  | Ag25 | S16  | 95.47(10)  | C40  | C39 | S20 | 124.2(12) |
| S17  | Ag25 | S25  | 140.65(10) | C40  | C39 | C44 | 116.1(14) |
| S25  | Ag25 | Ag21 | 112.50(8)  | C44  | C39 | S20 | 119.6(12) |
| S25  | Ag25 | Ag22 | 123.01(7)  | C41  | C40 | C39 | 124.8(17) |
| S25  | Ag25 | Ag24 | 75.08(7)   | C42  | C41 | C40 | 120.3(19) |
| S25  | Ag25 | Ag26 | 55.94(8)   | C41  | C42 | C43 | 119.4(18) |
| S25  | Ag25 | Ag58 | 156.95(8)  | C41  | C42 | C45 | 116.6(18) |
| S25  | Ag25 | Ag60 | 72.95(7)   | C43  | C42 | C45 | 123.9(18) |
| S25  | Ag25 | S16  | 106.99(10) | C42  | C43 | C44 | 120.5(18) |
| Ag7  | Ag26 | Ag25 | 113.65(4)  | C39  | C44 | C43 | 118.6(17) |
| Ag7  | Ag26 | Ag27 | 60.16(3)   | C42  | C45 | C48 | 104.5(16) |
| Ag7  | Ag26 | Ag62 | 72.23(3)   | C46  | C45 | C42 | 112.2(17) |
| Ag21 | Ag26 | Ag7  | 60.74(3)   | C46  | C45 | C48 | 108.3(17) |
| Ag21 | Ag26 | Ag25 | 60.90(3)   | C47  | C45 | C42 | 110.6(17) |
| Ag21 | Ag26 | Ag27 | 87.42(3)   | C47  | C45 | C46 | 126.8(19) |
| Ag21 | Ag26 | Ag62 | 123.80(4)  | C47  | C45 | C48 | 89.7(16)  |
| Ag24 | Ag26 | Ag7  | 59.71(3)   | C50  | C49 | P1  | 121.9(13) |
| Ag24 | Ag26 | Ag21 | 58.76(3)   | C50  | C49 | C54 | 117.0(15) |
| Ag24 | Ag26 | Ag25 | 64.83(3)   | C54  | C49 | P1  | 121.0(12) |
| Ag24 | Ag26 | Ag27 | 119.61(4)  | C49  | C50 | C51 | 121.9(17) |
| Ag24 | Ag26 | Ag62 | 72.13(3)   | C52  | C51 | C50 | 117(2)    |
| Ag25 | Ag26 | Ag27 | 140.91(4)  | C53  | C52 | C51 | 121(2)    |
| Ag25 | Ag26 | Ag62 | 121.03(4)  | C52  | C53 | C54 | 125(2)    |
| Ag27 | Ag26 | Ag62 | 94.91(4)   | C49  | C54 | C53 | 116.7(18) |
| S3   | Ag26 | Ag7  | 96.03(8)   | C56  | C55 | P1  | 123.8(13) |
| S3   | Ag26 | Ag21 | 74.71(7)   | C60  | C55 | P1  | 118.6(13) |
| S3   | Ag26 | Ag24 | 133.36(8)  | C60  | C55 | C56 | 117.4(16) |
| S3   | Ag26 | Ag25 | 96.71(9)   | C57  | C56 | C55 | 122(2)    |
| S3   | Ag26 | Ag27 | 50.10(9)   | C56  | C57 | C58 | 122(3)    |
| S3   | Ag26 | Ag62 | 142.19(9)  | C57  | C58 | C59 | 118(2)    |
| S3   | Ag26 | S21  | 95.54(11)  | C60  | C59 | C58 | 120(2)    |
| S3   | Ag26 | S25  | 125.84(10) | C59  | C60 | C55 | 119.5(18) |
| S21  | Ag26 | Ag7  | 74.51(7)   | C62  | C61 | P1  | 128.3(15) |
| S21  | Ag26 | Ag21 | 132.27(8)  | C62  | C61 | C66 | 113.0(17) |
| S21  | Ag26 | Ag24 | 112.45(8)  | C66  | C61 | P1  | 118.0(12) |
| S21  | Ag26 | Ag25 | 164.39(8)  | C61  | C62 | C63 | 128(2)    |
| S21  | Ag26 | Ag27 | 54.52(8)   | C62  | C63 | C64 | 117(2)    |
| S21  | Ag26 | Ag62 | 46.95(8)   | C65  | C64 | C63 | 117(2)    |
| S25  | Ag26 | Ag7  | 135.56(7)  | C64  | C65 | C66 | 123(2)    |

|      |      |      |            |     |     |     |           |
|------|------|------|------------|-----|-----|-----|-----------|
| S25  | Ag26 | Ag21 | 112.28(7)  | C65 | C66 | C61 | 120.9(16) |
| S25  | Ag26 | Ag24 | 78.91(6)   | C68 | C67 | S18 | 121.9(10) |
| S25  | Ag26 | Ag25 | 53.66(7)   | C68 | C67 | C72 | 118.1(12) |
| S25  | Ag26 | Ag27 | 158.88(7)  | C72 | C67 | S18 | 120.1(10) |
| S25  | Ag26 | Ag62 | 80.69(8)   | C67 | C68 | C69 | 120.8(14) |
| S25  | Ag26 | S21  | 110.98(10) | C70 | C69 | C68 | 119.6(16) |
| Ag6  | Ag27 | Ag7  | 55.82(3)   | C69 | C70 | C71 | 120.2(18) |
| Ag6  | Ag27 | Ag8  | 56.03(3)   | C69 | C70 | C73 | 116.5(18) |
| Ag6  | Ag27 | Ag15 | 107.13(3)  | C71 | C70 | C73 | 123.2(19) |
| Ag6  | Ag27 | Ag26 | 110.40(3)  | C72 | C71 | C70 | 118.5(19) |
| Ag6  | Ag27 | Ag28 | 57.31(3)   | C71 | C72 | C67 | 122.7(17) |
| Ag6  | Ag27 | Ag32 | 62.95(3)   | C74 | C73 | C70 | 107.1(17) |
| Ag7  | Ag27 | Ag15 | 103.51(3)  | C75 | C73 | C70 | 110.2(17) |
| Ag7  | Ag27 | Ag26 | 54.59(3)   | C75 | C73 | C74 | 96.9(17)  |
| Ag7  | Ag27 | Ag32 | 64.33(3)   | C76 | C73 | C70 | 108.8(17) |
| Ag8  | Ag27 | Ag7  | 58.06(3)   | C76 | C73 | C74 | 117.9(18) |
| Ag8  | Ag27 | Ag15 | 55.68(3)   | C76 | C73 | C75 | 115.2(18) |
| Ag8  | Ag27 | Ag26 | 86.36(3)   | C82 | C77 | S21 | 119.2(7)  |
| Ag8  | Ag27 | Ag28 | 60.96(3)   | C82 | C77 | C78 | 120.0     |
| Ag8  | Ag27 | Ag32 | 111.76(4)  | C78 | C77 | S21 | 120.8(7)  |
| Ag26 | Ag27 | Ag15 | 87.54(4)   | C81 | C82 | C77 | 120.0     |
| Ag26 | Ag27 | Ag32 | 88.46(4)   | C82 | C81 | C80 | 120.0     |
| Ag28 | Ag27 | Ag7  | 106.08(3)  | C81 | C80 | C83 | 126.1(12) |
| Ag28 | Ag27 | Ag15 | 70.05(4)   | C79 | C80 | C81 | 120.0     |
| Ag28 | Ag27 | Ag26 | 146.84(4)  | C79 | C80 | C83 | 113.8(12) |
| Ag28 | Ag27 | Ag32 | 107.87(4)  | C78 | C79 | C80 | 120.0     |
| Ag32 | Ag27 | Ag15 | 167.04(4)  | C79 | C78 | C77 | 120.0     |
| S3   | Ag27 | Ag6  | 132.07(7)  | C84 | C83 | C80 | 104.0(15) |
| S3   | Ag27 | Ag7  | 91.26(7)   | C84 | C83 | C86 | 104.9(19) |
| S3   | Ag27 | Ag8  | 77.63(7)   | C85 | C83 | C80 | 113.2(19) |
| S3   | Ag27 | Ag15 | 42.35(7)   | C85 | C83 | C84 | 107.9(14) |
| S3   | Ag27 | Ag26 | 49.74(7)   | C85 | C83 | C86 | 105.0(11) |
| S3   | Ag27 | Ag28 | 112.39(8)  | C86 | C83 | C80 | 121.1(18) |
| S3   | Ag27 | Ag32 | 137.43(8)  | C88 | C87 | S23 | 122.5(11) |
| S3   | Ag27 | S21  | 92.15(10)  | C88 | C87 | C92 | 121.4(12) |
| S21  | Ag27 | Ag6  | 104.87(7)  | C92 | C87 | S23 | 116.0(9)  |
| S21  | Ag27 | Ag7  | 69.78(7)   | C87 | C88 | C89 | 116.4(15) |
| S21  | Ag27 | Ag8  | 126.24(7)  | C90 | C89 | C88 | 126.9(15) |
| S21  | Ag27 | Ag15 | 134.48(8)  | C89 | C90 | C91 | 115.1(16) |
| S21  | Ag27 | Ag26 | 50.94(7)   | C89 | C90 | C93 | 129.2(16) |

|      |      |      |            |      |      |      |           |
|------|------|------|------------|------|------|------|-----------|
| S21  | Ag27 | Ag28 | 155.37(8)  | C91  | C90  | C93  | 115.7(16) |
| S21  | Ag27 | Ag32 | 47.87(8)   | C90  | C91  | C92  | 122.1(18) |
| S41  | Ag27 | Ag6  | 87.44(8)   | C91  | C92  | C87  | 117.9(14) |
| S41  | Ag27 | Ag7  | 141.27(8)  | C94  | C93  | C90  | 111.3(16) |
| S41  | Ag27 | Ag8  | 113.90(9)  | C94  | C93  | C96  | 99.8(17)  |
| S41  | Ag27 | Ag15 | 98.46(8)   | C95  | C93  | C90  | 110.8(16) |
| S41  | Ag27 | Ag26 | 158.73(8)  | C95  | C93  | C94  | 118.5(18) |
| S41  | Ag27 | Ag28 | 52.95(8)   | C95  | C93  | C96  | 102.5(17) |
| S41  | Ag27 | Ag32 | 89.68(8)   | C96  | C93  | C90  | 113.0(17) |
| S41  | Ag27 | S3   | 125.69(10) | C98  | C97  | S24  | 116.5(5)  |
| S41  | Ag27 | S21  | 114.58(11) | C98  | C97  | C102 | 120.0     |
| Ag5  | Ag28 | Ag29 | 55.34(2)   | C102 | C97  | S24  | 123.5(5)  |
| Ag5  | Ag28 | Ag30 | 66.43(3)   | C97  | C98  | C99  | 120.0     |
| Ag6  | Ag28 | Ag5  | 56.41(3)   | C98  | C99  | C100 | 120.0     |
| Ag6  | Ag28 | Ag8  | 55.67(3)   | C99  | C100 | C103 | 117.2(9)  |
| Ag6  | Ag28 | Ag27 | 59.38(3)   | C101 | C100 | C99  | 120.0     |
| Ag6  | Ag28 | Ag29 | 111.29(3)  | C101 | C100 | C103 | 122.7(9)  |
| Ag6  | Ag28 | Ag30 | 65.11(3)   | C100 | C101 | C102 | 120.0     |
| Ag8  | Ag28 | Ag5  | 56.60(3)   | C101 | C102 | C97  | 120.0     |
| Ag8  | Ag28 | Ag27 | 58.04(3)   | C100 | C103 | C106 | 109.1(14) |
| Ag8  | Ag28 | Ag29 | 81.12(3)   | C104 | C103 | C100 | 111.5(15) |
| Ag8  | Ag28 | Ag30 | 112.98(4)  | C104 | C103 | C105 | 108.6(17) |
| Ag27 | Ag28 | Ag5  | 105.41(3)  | C104 | C103 | C106 | 109.0(17) |
| Ag27 | Ag28 | Ag29 | 136.41(4)  | C105 | C103 | C100 | 110.7(15) |
| Ag27 | Ag28 | Ag30 | 114.13(4)  | C105 | C103 | C106 | 107.8(16) |
| Ag29 | Ag28 | Ag30 | 94.33(4)   | C112 | C107 | P2   | 117.1(6)  |
| S4   | Ag28 | Ag5  | 95.81(7)   | C112 | C107 | C108 | 120.0     |
| S4   | Ag28 | Ag6  | 133.78(8)  | C108 | C107 | P2   | 122.7(6)  |
| S4   | Ag28 | Ag8  | 78.41(7)   | C107 | C112 | C111 | 120.0     |
| S4   | Ag28 | Ag27 | 102.72(8)  | C110 | C111 | C112 | 120.0     |
| S4   | Ag28 | Ag29 | 50.11(7)   | C109 | C110 | C111 | 120.0     |
| S4   | Ag28 | Ag30 | 141.98(8)  | C110 | C109 | C108 | 120.0     |
| S5   | Ag28 | Ag5  | 68.17(6)   | C109 | C108 | C107 | 120.0     |
| S5   | Ag28 | Ag6  | 106.80(7)  | C114 | C113 | P2   | 119.1(8)  |
| S5   | Ag28 | Ag8  | 122.19(7)  | C114 | C113 | C118 | 120.0     |
| S5   | Ag28 | Ag27 | 164.39(8)  | C118 | C113 | P2   | 120.9(8)  |
| S5   | Ag28 | Ag29 | 52.57(7)   | C115 | C114 | C113 | 120.0     |
| S5   | Ag28 | Ag30 | 50.40(7)   | C114 | C115 | C116 | 120.0     |
| S5   | Ag28 | S4   | 92.25(10)  | C117 | C116 | C115 | 120.0     |
| S41  | Ag28 | Ag5  | 144.89(8)  | C116 | C117 | C118 | 120.0     |

|      |           |            |      |      |      |           |
|------|-----------|------------|------|------|------|-----------|
| S41  | Ag28 Ag6  | 89.01(7)   | C117 | C118 | C113 | 120.0     |
| S41  | Ag28 Ag8  | 111.23(9)  | C120 | C119 | S22  | 122.8(11) |
| S41  | Ag28 Ag27 | 53.19(8)   | C124 | C119 | S22  | 121.4(11) |
| S41  | Ag28 Ag29 | 159.68(8)  | C124 | C119 | C120 | 115.6(14) |
| S41  | Ag28 Ag30 | 95.30(9)   | C121 | C120 | C119 | 122.7(15) |
| S41  | Ag28 S4   | 114.81(11) | C122 | C121 | C120 | 120.1(15) |
| S41  | Ag28 S5   | 123.98(11) | C121 | C122 | C123 | 119.0(14) |
| Ag5  | Ag29 Ag13 | 107.72(3)  | C121 | C122 | C125 | 124.3(14) |
| Ag5  | Ag29 Ag14 | 105.18(4)  | C123 | C122 | C125 | 116.7(14) |
| Ag5  | Ag29 Ag28 | 59.54(3)   | C124 | C123 | C122 | 120.9(15) |
| Ag5  | Ag29 Ag69 | 64.70(3)   | C119 | C124 | C123 | 121.5(15) |
| Ag9  | Ag29 Ag5  | 58.05(3)   | C122 | C125 | C128 | 113.5(14) |
| Ag9  | Ag29 Ag12 | 55.46(2)   | C126 | C125 | C122 | 110.4(14) |
| Ag9  | Ag29 Ag13 | 59.58(3)   | C126 | C125 | C127 | 109.0(15) |
| Ag9  | Ag29 Ag14 | 55.65(3)   | C126 | C125 | C128 | 105.0(14) |
| Ag9  | Ag29 Ag28 | 91.93(3)   | C127 | C125 | C122 | 108.2(14) |
| Ag9  | Ag29 Ag69 | 110.46(3)  | C127 | C125 | C128 | 110.5(15) |
| Ag12 | Ag29 Ag5  | 56.72(2)   | C130 | C129 | S25  | 118.4(10) |
| Ag12 | Ag29 Ag13 | 59.81(3)   | C134 | C129 | S25  | 121.3(11) |
| Ag12 | Ag29 Ag14 | 104.78(3)  | C134 | C129 | C130 | 120.3(13) |
| Ag12 | Ag29 Ag28 | 116.24(3)  | C131 | C130 | C129 | 118.4(14) |
| Ag12 | Ag29 Ag69 | 61.74(3)   | C130 | C131 | C132 | 122.9(15) |
| Ag13 | Ag29 Ag14 | 62.27(3)   | C131 | C132 | C135 | 120.4(14) |
| Ag13 | Ag29 Ag28 | 148.87(4)  | C133 | C132 | C131 | 115.5(14) |
| Ag13 | Ag29 Ag69 | 110.05(4)  | C133 | C132 | C135 | 124.1(14) |
| Ag14 | Ag29 Ag28 | 92.22(4)   | C132 | C133 | C134 | 121.2(14) |
| Ag14 | Ag29 Ag69 | 165.90(4)  | C129 | C134 | C133 | 121.7(14) |
| Ag69 | Ag29 Ag28 | 90.63(4)   | C132 | C135 | C136 | 107.7(15) |
| S4   | Ag29 Ag5  | 100.75(7)  | C132 | C135 | C137 | 107.1(15) |
| S4   | Ag29 Ag9  | 88.77(7)   | C137 | C135 | C136 | 113.2(16) |
| S4   | Ag29 Ag12 | 143.58(8)  | C138 | C135 | C132 | 111.2(16) |
| S4   | Ag29 Ag13 | 110.74(8)  | C138 | C135 | C136 | 101.5(16) |
| S4   | Ag29 Ag14 | 49.64(8)   | C138 | C135 | C137 | 116.0(18) |
| S4   | Ag29 Ag28 | 51.81(8)   | C140 | C139 | S26  | 121.4(11) |
| S4   | Ag29 Ag69 | 139.17(8)  | C140 | C139 | C144 | 117.3(13) |
| S4   | Ag29 S5   | 90.96(10)  | C144 | C139 | S26  | 121.2(10) |
| S5   | Ag29 Ag5  | 69.10(6)   | C139 | C140 | C141 | 119.7(17) |
| S5   | Ag29 Ag9  | 126.04(7)  | C140 | C141 | C142 | 122.8(19) |
| S5   | Ag29 Ag12 | 104.17(6)  | C141 | C142 | C145 | 121.5(18) |
| S5   | Ag29 Ag13 | 158.14(7)  | C143 | C142 | C141 | 116.4(18) |



|      |           |            |      |      |      |           |
|------|-----------|------------|------|------|------|-----------|
| S5   | Ag29 Ag14 | 139.53(8)  | C143 | C142 | C145 | 121.9(17) |
| S5   | Ag29 Ag28 | 49.34(7)   | C142 | C143 | C144 | 123.8(17) |
| S5   | Ag29 Ag69 | 48.43(6)   | C143 | C144 | C139 | 119.2(14) |
| S36  | Ag29 Ag5  | 131.38(6)  | C142 | C145 | C146 | 102.9(17) |
| S36  | Ag29 Ag9  | 110.96(7)  | C147 | C145 | C142 | 116.6(19) |
| S36  | Ag29 Ag12 | 77.77(6)   | C147 | C145 | C146 | 109.2(19) |
| S36  | Ag29 Ag13 | 53.35(7)   | C148 | C145 | C142 | 113.5(19) |
| S36  | Ag29 Ag14 | 101.89(7)  | C148 | C145 | C146 | 110.6(19) |
| S36  | Ag29 Ag28 | 157.05(7)  | C148 | C145 | C147 | 104(2)    |
| S36  | Ag29 Ag69 | 80.09(7)   | C150 | C149 | S16  | 122.2(11) |
| S36  | Ag29 S4   | 127.40(9)  | C150 | C149 | C154 | 118.0(13) |
| S36  | Ag29 S5   | 111.45(10) | C154 | C149 | S16  | 119.7(10) |
| Ag5  | Ag30 Ag69 | 55.19(3)   | C149 | C150 | C151 | 122.9(15) |
| Ag6  | Ag30 Ag5  | 47.77(3)   | C150 | C151 | C152 | 120.3(15) |
| Ag6  | Ag30 Ag28 | 49.57(3)   | C151 | C152 | C153 | 116.1(14) |
| Ag6  | Ag30 Ag69 | 102.82(4)  | C151 | C152 | C155 | 118.0(15) |
| Ag28 | Ag30 Ag5  | 52.94(3)   | C153 | C152 | C155 | 125.3(16) |
| Ag28 | Ag30 Ag69 | 82.71(4)   | C154 | C153 | C152 | 120.7(16) |
| Ag31 | Ag30 Ag5  | 101.99(5)  | C153 | C154 | C149 | 122.0(15) |
| Ag31 | Ag30 Ag6  | 54.58(3)   | C152 | C155 | C502 | 112.2(16) |
| Ag31 | Ag30 Ag28 | 83.66(4)   | C156 | C155 | C152 | 113.0(16) |
| Ag31 | Ag30 Ag35 | 77.13(4)   | C156 | C155 | C502 | 98.0(11)  |
| Ag31 | Ag30 Ag69 | 157.12(6)  | C157 | C155 | C152 | 100.3(14) |
| Ag35 | Ag30 Ag5  | 52.74(3)   | C157 | C155 | C156 | 118.4(14) |
| Ag35 | Ag30 Ag6  | 52.64(3)   | C157 | C155 | C502 | 115.6(14) |
| Ag35 | Ag30 Ag28 | 95.20(4)   | C159 | C158 | S15  | 120.4(5)  |
| Ag35 | Ag30 Ag69 | 85.90(3)   | C159 | C158 | C163 | 120.0     |
| S5   | Ag30 Ag5  | 59.77(6)   | C163 | C158 | S15  | 119.2(5)  |
| S5   | Ag30 Ag6  | 90.71(7)   | C158 | C159 | C160 | 120.0     |
| S5   | Ag30 Ag28 | 47.70(7)   | C159 | C160 | C161 | 120.0     |
| S5   | Ag30 Ag31 | 130.39(8)  | C160 | C161 | C164 | 121.3(9)  |
| S5   | Ag30 Ag35 | 111.36(7)  | C162 | C161 | C160 | 120.0     |
| S5   | Ag30 Ag69 | 43.42(6)   | C162 | C161 | C164 | 118.7(9)  |
| S32  | Ag30 Ag5  | 62.24(8)   | C161 | C162 | C163 | 120.0     |
| S32  | Ag30 Ag6  | 95.63(8)   | C162 | C163 | C158 | 120.0     |
| S32  | Ag30 Ag28 | 113.75(8)  | C161 | C164 | C165 | 117.4(14) |
| S32  | Ag30 Ag31 | 123.84(9)  | C161 | C164 | C166 | 112.3(15) |
| S32  | Ag30 Ag35 | 49.62(8)   | C161 | C164 | C167 | 117.1(15) |
| S32  | Ag30 Ag69 | 47.86(7)   | C165 | C164 | C166 | 101.5(18) |
| S32  | Ag30 S5   | 90.02(9)   | C167 | C164 | C165 | 102.9(3)  |

|                |            |                |           |
|----------------|------------|----------------|-----------|
| S42 Ag30 Ag5   | 145.53(11) | C167 C164 C166 | 103.6(3)  |
| S42 Ag30 Ag6   | 104.77(11) | C169 C168 S14  | 118.4(10) |
| S42 Ag30 Ag28  | 94.35(11)  | C173 C168 S14  | 123.1(11) |
| S42 Ag30 Ag31  | 58.79(10)  | C173 C168 C169 | 118.5(13) |
| S42 Ag30 Ag35  | 133.37(10) | C168 C169 C170 | 120.2(15) |
| S42 Ag30 Ag69  | 140.61(11) | C171 C170 C169 | 119.8(16) |
| S42 Ag30 S5    | 108.67(12) | C170 C171 C172 | 119.6(18) |
| S42 Ag30 S32   | 151.81(13) | C170 C171 C174 | 122.2(17) |
| Ag6 Ag31 Ag71  | 108.59(4)  | C172 C171 C174 | 118.1(18) |
| Ag30 Ag31 Ag6  | 71.60(4)   | C173 C172 C171 | 115(2)    |
| Ag30 Ag31 Ag32 | 140.16(5)  | C172 C173 C168 | 126.3(19) |
| Ag30 Ag31 Ag71 | 92.66(4)   | C171 C174 C175 | 107.7(16) |
| Ag32 Ag31 Ag6  | 69.24(4)   | C4AAC174 C171  | 107.3(16) |
| Ag32 Ag31 Ag71 | 92.95(4)   | C4AAC174 C175  | 102.9(13) |
| S39 Ag31 Ag6   | 79.51(7)   | C4AAC174 C3AA  | 127.3(18) |
| S39 Ag31 Ag30  | 87.70(8)   | C3AAC174 C171  | 109.1(16) |
| S39 Ag31 Ag32  | 92.15(8)   | C3AAC174 C175  | 100.8(11) |
| S39 Ag31 Ag71  | 171.58(8)  | C177 C176 S27  | 119.4(10) |
| S39 Ag31 S42   | 123.07(12) | C181 C176 S27  | 124.5(11) |
| S40 Ag31 Ag6   | 114.01(9)  | C181 C176 C177 | 115.2(14) |
| S40 Ag31 Ag30  | 147.42(9)  | C176 C177 C178 | 119.9(15) |
| S40 Ag31 Ag32  | 51.96(9)   | C179 C178 C177 | 123.4(18) |
| S40 Ag31 Ag71  | 54.80(8)   | C178 C179 C180 | 115.6(16) |
| S40 Ag31 S39   | 124.69(11) | C178 C179 C182 | 124.9(16) |
| S40 Ag31 S42   | 101.42(12) | C180 C179 C182 | 119.4(14) |
| S42 Ag31 Ag6   | 112.75(9)  | C181 C180 C179 | 121.2(16) |
| S42 Ag31 Ag30  | 50.83(9)   | C176 C181 C180 | 123.2(15) |
| S42 Ag31 Ag32  | 144.77(10) | C183 C182 C179 | 111.0(15) |
| S42 Ag31 Ag71  | 52.26(9)   | C184 C182 C179 | 114.6(15) |
| Ag6 Ag32 Ag7   | 49.13(3)   | C184 C182 C183 | 101.9(15) |
| Ag6 Ag32 Ag27  | 51.55(3)   | C185 C182 C179 | 109.4(16) |
| Ag6 Ag32 Ag33  | 51.68(3)   | C185 C182 C183 | 116.1(17) |
| Ag6 Ag32 Ag62  | 112.57(5)  | C185 C182 C184 | 103.7(18) |
| Ag27 Ag32 Ag7  | 53.83(3)   | C187 C186 S29  | 122.5(11) |
| Ag27 Ag32 Ag62 | 88.68(4)   | C187 C186 C191 | 117.1(14) |
| Ag31 Ag32 Ag6  | 55.39(3)   | C191 C186 S29  | 120.3(11) |
| Ag31 Ag32 Ag7  | 103.89(5)  | C186 C187 C188 | 122.1(14) |
| Ag31 Ag32 Ag27 | 87.45(5)   | C187 C188 C189 | 120.7(16) |
| Ag31 Ag32 Ag33 | 74.81(4)   | C188 C189 C0AA | 119.9(17) |
| Ag31 Ag32 Ag62 | 166.31(6)  | C190 C189 C188 | 117.2(17) |

|                |            |                |           |
|----------------|------------|----------------|-----------|
| Ag33 Ag32 Ag7  | 53.47(3)   | C190 C189 C0AA | 122.9(18) |
| Ag33 Ag32 Ag27 | 96.16(4)   | C191 C190 C189 | 123.9(19) |
| Ag33 Ag32 Ag62 | 92.57(4)   | C190 C191 C186 | 118.9(17) |
| Ag62 Ag32 Ag7  | 63.50(4)   | C193 C192 S32  | 120.3(11) |
| S6 Ag32 Ag6    | 95.85(8)   | C193 C192 C197 | 119.2(14) |
| S6 Ag32 Ag7    | 64.27(7)   | C197 C192 S32  | 120.5(12) |
| S6 Ag32 Ag27   | 117.11(8)  | C192 C193 C194 | 121.4(15) |
| S6 Ag32 Ag31   | 118.76(9)  | C195 C194 C193 | 120.2(17) |
| S6 Ag32 Ag33   | 49.10(8)   | C194 C195 C196 | 115.0(16) |
| S6 Ag32 Ag62   | 52.29(8)   | C194 C195 C198 | 117.5(17) |
| S6 Ag32 S21    | 94.18(11)  | C196 C195 C198 | 127.4(17) |
| S21 Ag32 Ag6   | 98.84(8)   | C197 C196 C195 | 123.4(18) |
| S21 Ag32 Ag7   | 65.79(7)   | C196 C197 C192 | 120.1(18) |
| S21 Ag32 Ag27  | 52.75(8)   | C195 C198 C199 | 107.9(15) |
| S21 Ag32 Ag31  | 137.96(9)  | C195 C198 C200 | 110.3(16) |
| S21 Ag32 Ag33  | 117.54(8)  | C200 C198 C199 | 113.1(16) |
| S21 Ag32 Ag62  | 44.07(8)   | C493 C198 C195 | 112.3(16) |
| S40 Ag32 Ag6   | 104.99(10) | C493 C198 C199 | 115.2(17) |
| S40 Ag32 Ag7   | 150.51(10) | C493 C198 C200 | 97.9(16)  |
| S40 Ag32 Ag27  | 100.60(9)  | C203 C202 S34  | 120.4(6)  |
| S40 Ag32 Ag31  | 55.80(10)  | C203 C202 C207 | 120.0     |
| S40 Ag32 Ag33  | 126.45(10) | C207 C202 S34  | 119.5(6)  |
| S40 Ag32 Ag62  | 137.88(11) | C204 C203 C202 | 120.0     |
| S40 Ag32 S6    | 142.06(12) | C205 C204 C203 | 120.0     |
| S40 Ag32 S21   | 113.01(12) | C204 C205 C206 | 120.0     |
| Ag4 Ag33 Ag7   | 56.73(3)   | C204 C205 C485 | 122.7(6)  |
| Ag4 Ag33 Ag32  | 110.86(4)  | C206 C205 C485 | 116.3(6)  |
| Ag4 Ag33 Ag34  | 58.49(3)   | C207 C206 C205 | 120.0     |
| Ag4 Ag33 Ag35  | 60.27(3)   | C206 C207 C202 | 120.0     |
| Ag4 Ag33 Ag64  | 89.70(3)   | C209 C208 S35  | 122.4(11) |
| Ag6 Ag33 Ag4   | 55.55(2)   | C209 C208 C213 | 118.1(13) |
| Ag6 Ag33 Ag7   | 56.04(3)   | C213 C208 S35  | 119.4(11) |
| Ag6 Ag33 Ag32  | 63.04(3)   | C208 C209 C210 | 117.4(14) |
| Ag6 Ag33 Ag34  | 106.35(3)  | C211 C210 C209 | 124.6(16) |
| Ag6 Ag33 Ag35  | 61.67(3)   | C210 C211 C212 | 116.6(15) |
| Ag6 Ag33 Ag64  | 111.40(4)  | C210 C211 C214 | 122.3(15) |
| Ag7 Ag33 Ag32  | 64.66(3)   | C212 C211 C214 | 121.1(14) |
| Ag7 Ag33 Ag64  | 55.48(3)   | C211 C212 C213 | 123.5(14) |
| Ag34 Ag33 Ag7  | 107.67(4)  | C212 C213 C208 | 119.4(15) |
| Ag34 Ag33 Ag32 | 169.02(4)  | C215 C214 C211 | 109.3(16) |

|                |            |                |           |
|----------------|------------|----------------|-----------|
| Ag34 Ag33 Ag64 | 96.93(4)   | C215 C214 C216 | 105.7(17) |
| Ag35 Ag33 Ag7  | 108.01(3)  | C216 C214 C211 | 112.2(16) |
| Ag35 Ag33 Ag32 | 113.68(4)  | C217 C214 C211 | 105.9(16) |
| Ag35 Ag33 Ag34 | 59.91(3)   | C217 C214 C215 | 116.0(17) |
| Ag35 Ag33 Ag64 | 148.26(4)  | C217 C214 C216 | 107.8(17) |
| Ag64 Ag33 Ag32 | 85.13(4)   | C219 C218 P3   | 125.7(12) |
| S6 Ag33 Ag4    | 125.54(8)  | C219 C218 C223 | 116.1(15) |
| S6 Ag33 Ag6    | 104.15(7)  | C223 C218 P3   | 118.2(12) |
| S6 Ag33 Ag7    | 70.03(7)   | C218 C219 C220 | 123.4(18) |
| S6 Ag33 Ag32   | 46.70(7)   | C221 C220 C219 | 118(2)    |
| S6 Ag33 Ag34   | 140.20(8)  | C222 C221 C220 | 118.3(19) |
| S6 Ag33 Ag35   | 159.88(8)  | C221 C222 C223 | 120.8(19) |
| S6 Ag33 Ag64   | 47.64(7)   | C218 C223 C222 | 123.1(18) |
| S6 Ag33 S38    | 90.42(10)  | C229 C224 P3   | 118.0(6)  |
| S38 Ag33 Ag4   | 92.53(7)   | C229 C224 C225 | 120.0     |
| S38 Ag33 Ag6   | 147.76(8)  | C225 C224 P3   | 122.0(6)  |
| S38 Ag33 Ag7   | 104.92(8)  | C228 C229 C224 | 120.0     |
| S38 Ag33 Ag32  | 137.11(8)  | C229 C228 C227 | 120.0     |
| S38 Ag33 Ag34  | 50.78(7)   | C226 C227 C228 | 120.0     |
| S38 Ag33 Ag35  | 109.10(8)  | C227 C226 C225 | 120.0     |
| S38 Ag33 Ag64  | 58.67(7)   | C226 C225 C224 | 120.0     |
| S39 Ag33 Ag4   | 112.67(8)  | C231 C230 P3   | 124.7(12) |
| S39 Ag33 Ag6   | 79.48(7)   | C235 C230 P3   | 119.6(11) |
| S39 Ag33 Ag7   | 132.62(7)  | C235 C230 C231 | 115.6(15) |
| S39 Ag33 Ag32  | 82.16(7)   | C230 C231 C232 | 124.1(17) |
| S39 Ag33 Ag34  | 99.19(8)   | C233 C232 C231 | 116.7(18) |
| S39 Ag33 Ag35  | 54.62(7)   | C232 C233 C234 | 122.2(18) |
| S39 Ag33 Ag64  | 157.06(8)  | C235 C234 C233 | 112.4(17) |
| S39 Ag33 S6    | 111.08(11) | C230 C235 C234 | 128.9(17) |
| S39 Ag33 S38   | 122.23(10) | C237 C236 S33  | 124.0(11) |
| Ag3 Ag34 Ag49  | 61.00(3)   | C237 C236 C241 | 118.2(13) |
| Ag4 Ag34 Ag3   | 53.38(2)   | C241 C236 S33  | 117.7(11) |
| Ag4 Ag34 Ag33  | 60.11(3)   | C238 C237 C236 | 123.7(15) |
| Ag4 Ag34 Ag35  | 60.78(3)   | C237 C238 C239 | 122.9(16) |
| Ag4 Ag34 Ag49  | 89.47(4)   | C238 C239 C240 | 114.5(14) |
| Ag4 Ag34 Ag51  | 96.03(4)   | C238 C239 C242 | 123.7(15) |
| Ag4 Ag34 S11   | 127.68(7)  | C240 C239 C242 | 121.5(14) |
| Ag33 Ag34 Ag3  | 105.75(3)  | C239 C240 C241 | 122.0(15) |
| Ag33 Ag34 Ag49 | 91.05(4)   | C236 C241 C240 | 118.1(14) |
| Ag33 Ag34 S11  | 146.73(8)  | C239 C242 C244 | 103.9(15) |

|                |            |                |           |
|----------------|------------|----------------|-----------|
| Ag35 Ag34 Ag3  | 106.51(3)  | C243 C242 C239 | 115.5(17) |
| Ag35 Ag34 Ag33 | 59.81(3)   | C243 C242 C244 | 101.6(17) |
| Ag35 Ag34 Ag49 | 145.37(4)  | C243 C242 C245 | 112.5(18) |
| Ag35 Ag34 S11  | 153.16(8)  | C245 C242 C239 | 112.6(16) |
| Ag51 Ag34 Ag3  | 55.94(3)   | C245 C242 C244 | 109.5(17) |
| Ag51 Ag34 Ag33 | 155.91(4)  | C247 C246 S36  | 119.7(9)  |
| Ag51 Ag34 Ag35 | 107.35(4)  | C251 C246 S36  | 120.8(9)  |
| Ag51 Ag34 Ag49 | 92.07(4)   | C251 C246 C247 | 119.2(12) |
| Ag51 Ag34 S11  | 50.06(8)   | C246 C247 C248 | 119.3(13) |
| S7 Ag34 Ag3    | 97.25(8)   | C249 C248 C247 | 124.3(13) |
| S7 Ag34 Ag4    | 93.73(7)   | C248 C249 C250 | 114.9(13) |
| S7 Ag34 Ag33   | 116.78(8)  | C248 C249 C252 | 123.5(13) |
| S7 Ag34 Ag35   | 57.32(7)   | C250 C249 C252 | 121.6(14) |
| S7 Ag34 Ag49   | 149.44(9)  | C249 C250 C251 | 122.8(14) |
| S7 Ag34 Ag51   | 57.37(8)   | C246 C251 C250 | 119.1(13) |
| S7 Ag34 S11    | 95.84(10)  | C249 C252 C253 | 108.5(14) |
| S11 Ag34 Ag3   | 74.40(7)   | C249 C252 C255 | 114.2(15) |
| S11 Ag34 Ag49  | 59.28(8)   | C254 C252 C249 | 112.0(14) |
| S38 Ag34 Ag3   | 103.23(8)  | C254 C252 C253 | 109.2(15) |
| S38 Ag34 Ag4   | 98.36(7)   | C254 C252 C255 | 106.5(15) |
| S38 Ag34 Ag33  | 57.37(7)   | C255 C252 C253 | 106.2(15) |
| S38 Ag34 Ag35  | 115.36(8)  | C257 C256 S37  | 116.7(10) |
| S38 Ag34 Ag49  | 47.67(8)   | C261 C256 S37  | 123.9(10) |
| S38 Ag34 Ag51  | 136.68(8)  | C261 C256 C257 | 119.4(12) |
| S38 Ag34 S7    | 159.52(12) | C258 C257 C256 | 119.8(13) |
| S38 Ag34 S11   | 89.80(10)  | C259 C258 C257 | 119.0(14) |
| Ag4 Ag35 Ag5   | 56.18(3)   | C258 C259 C262 | 120.3(14) |
| Ag4 Ag35 Ag6   | 54.39(2)   | C260 C259 C258 | 117.5(16) |
| Ag4 Ag35 Ag30  | 111.75(4)  | C260 C259 C262 | 122.2(16) |
| Ag4 Ag35 Ag34  | 58.35(3)   | C259 C260 C261 | 126(2)    |
| Ag4 Ag35 Ag36  | 90.09(3)   | C256 C261 C260 | 118.1(16) |
| Ag5 Ag35 Ag30  | 66.80(3)   | C259 C262 C263 | 110.4(17) |
| Ag5 Ag35 Ag36  | 59.17(3)   | C259 C262 C264 | 110.1(17) |
| Ag6 Ag35 Ag5   | 55.18(2)   | C263 C262 C264 | 112.2(18) |
| Ag6 Ag35 Ag30  | 63.85(3)   | C265 C262 C259 | 109.4(18) |
| Ag6 Ag35 Ag36  | 114.34(3)  | C265 C262 C263 | 104.0(19) |
| Ag33 Ag35 Ag4  | 59.47(3)   | C265 C262 C264 | 110.7(19) |
| Ag33 Ag35 Ag5  | 105.32(4)  | C267 C266 S31  | 121.0(10) |
| Ag33 Ag35 Ag6  | 58.64(3)   | C267 C266 C271 | 116.6(12) |
| Ag33 Ag35 Ag30 | 109.85(4)  | C271 C266 S31  | 122.3(10) |

|                |            |                |           |
|----------------|------------|----------------|-----------|
| Ag33 Ag35 Ag34 | 60.28(3)   | C266 C267 C268 | 121.0(13) |
| Ag33 Ag35 Ag36 | 147.61(4)  | C269 C268 C267 | 123.7(13) |
| Ag34 Ag35 Ag5  | 108.07(4)  | C268 C269 C272 | 124.1(13) |
| Ag34 Ag35 Ag6  | 104.35(4)  | C270 C269 C268 | 112.6(13) |
| Ag34 Ag35 Ag30 | 168.15(4)  | C270 C269 C272 | 123.3(14) |
| Ag34 Ag35 Ag36 | 95.62(3)   | C271 C270 C269 | 124.7(16) |
| Ag36 Ag35 Ag30 | 90.68(3)   | C270 C271 C266 | 121.3(14) |
| S7 Ag35 Ag4    | 88.28(8)   | C269 C272 C273 | 107.7(13) |
| S7 Ag35 Ag5    | 100.64(7)  | C269 C272 C275 | 111.2(14) |
| S7 Ag35 Ag6    | 142.03(8)  | C274 C272 C269 | 110.3(14) |
| S7 Ag35 Ag30   | 138.80(8)  | C274 C272 C273 | 106.7(15) |
| S7 Ag35 Ag33   | 111.33(8)  | C274 C272 C275 | 109.4(15) |
| S7 Ag35 Ag34   | 51.36(8)   | C275 C272 C273 | 111.5(14) |
| S7 Ag35 Ag36   | 52.23(7)   | C277 C276 S30  | 117.1(9)  |
| S32 Ag35 Ag4   | 124.56(7)  | C277 C276 C281 | 120.0     |
| S32 Ag35 Ag5   | 69.22(7)   | C281 C276 S30  | 122.8(9)  |
| S32 Ag35 Ag6   | 102.35(7)  | C276 C277 C278 | 120.0     |
| S32 Ag35 Ag30  | 45.73(7)   | C277 C278 C279 | 120.0     |
| S32 Ag35 Ag33  | 155.54(7)  | C278 C279 C282 | 125.0(13) |
| S32 Ag35 Ag34  | 144.08(7)  | C280 C279 C278 | 120.0     |
| S32 Ag35 Ag36  | 51.09(7)   | C280 C279 C282 | 114.7(13) |
| S32 Ag35 S7    | 93.12(10)  | C279 C280 C281 | 120.0     |
| S39 Ag35 Ag4   | 111.97(8)  | C280 C281 C276 | 120.0     |
| S39 Ag35 Ag5   | 129.61(7)  | C283 C282 C279 | 105.8(15) |
| S39 Ag35 Ag6   | 77.80(7)   | C283 C282 C284 | 106.5(17) |
| S39 Ag35 Ag30  | 77.59(7)   | C283 C282 C505 | 108.8(17) |
| S39 Ag35 Ag33  | 54.70(8)   | C284 C282 C279 | 115.9(16) |
| S39 Ag35 Ag34  | 99.53(7)   | C505 C282 C279 | 114.2(17) |
| S39 Ag35 Ag36  | 157.54(8)  | C505 C282 C284 | 105.3(17) |
| S39 Ag35 S7    | 129.25(9)  | C286 C285 P4   | 116.7(13) |
| S39 Ag35 S32   | 109.30(10) | C286 C285 C290 | 120.7(15) |
| Ag5 Ag36 Ag35  | 57.88(3)   | C290 C285 P4   | 122.3(12) |
| Ag5 Ag36 Ag69  | 62.84(3)   | C285 C286 C287 | 120.8(16) |
| Ag10 Ag36 Ag5  | 56.94(2)   | C288 C287 C286 | 118.1(16) |
| Ag10 Ag36 Ag35 | 82.51(3)   | C289 C288 C287 | 116.9(18) |
| Ag10 Ag36 Ag37 | 60.57(3)   | C288 C289 C290 | 125(2)    |
| Ag10 Ag36 Ag69 | 109.79(4)  | C285 C290 C289 | 117.7(16) |
| Ag12 Ag36 Ag5  | 55.61(2)   | C292 C291 P4   | 120.5(12) |
| Ag12 Ag36 Ag10 | 55.56(2)   | C292 C291 C296 | 116.6(15) |
| Ag12 Ag36 Ag35 | 112.96(3)  | C296 C291 P4   | 122.9(13) |

|                          |                          |
|--------------------------|--------------------------|
| Ag12 Ag36 Ag37 59.81(3)  | C293 C292 C291 122.3(15) |
| Ag12 Ag36 Ag69 62.47(3)  | C294 C293 C292 120.7(18) |
| Ag37 Ag36 Ag5 106.91(3)  | C293 C294 C295 120(2)    |
| Ag37 Ag36 Ag35 139.89(4) | C294 C295 C296 122(2)    |
| Ag37 Ag36 Ag69 111.69(4) | C295 C296 C291 118(2)    |
| Ag69 Ag36 Ag35 94.35(3)  | C298 C297 P4 122.3(8)    |
| S7 Ag36 Ag5 98.93(7)     | C298 C297 C302 120.0     |
| S7 Ag36 Ag10 78.95(8)    | C302 C297 P4 117.3(8)    |
| S7 Ag36 Ag12 134.40(8)   | C299 C298 C297 120.0     |
| S7 Ag36 Ag35 51.46(7)    | C298 C299 C300 120.0     |
| S7 Ag36 Ag37 102.76(8)   | C301 C300 C299 120.0     |
| S7 Ag36 Ag69 144.31(8)   | C300 C301 C302 120.0     |
| S32 Ag36 Ag5 68.48(7)    | C301 C302 C297 120.0     |
| S32 Ag36 Ag10 122.05(8)  | C304 C303 S28 124.3(12)  |
| S32 Ag36 Ag12 107.99(7)  | C304 C303 C308 119.3(15) |
| S32 Ag36 Ag35 51.03(7)   | C308 C303 S28 116.1(12)  |
| S32 Ag36 Ag37 164.72(7)  | C303 C304 C305 123.7(16) |
| S32 Ag36 Ag69 53.06(6)   | C304 C305 C306 117.7(17) |
| S32 Ag36 S7 92.43(10)    | C305 C306 C490 115.6(17) |
| S34 Ag36 Ag5 139.74(7)   | C307 C306 C305 115.7(17) |
| S34 Ag36 Ag10 113.97(8)  | C307 C306 C490 128.3(19) |
| S34 Ag36 Ag12 86.13(7)   | C306 C307 C308 125.5(18) |
| S34 Ag36 Ag35 160.26(7)  | C303 C308 C307 117.5(16) |
| S34 Ag36 Ag37 53.62(7)   | C310 C309 S13 120.9(10)  |
| S34 Ag36 Ag69 90.15(6)   | C314 C309 S13 119.2(11)  |
| S34 Ag36 S7 118.65(9)    | C314 C309 C310 119.8(13) |
| S34 Ag36 S32 119.99(10)  | C311 C310 C309 118.4(15) |
| Ag10 Ag37 Ag11 56.08(3)  | C312 C311 C310 124.6(15) |
| Ag10 Ag37 Ag38 82.37(3)  | C311 C312 C313 114.2(14) |
| Ag10 Ag37 Ag67 114.81(4) | C311 C312 C315 127.2(14) |
| Ag11 Ag37 Ag38 55.57(2)  | C313 C312 C315 118.4(14) |
| Ag11 Ag37 Ag67 67.54(3)  | C314 C313 C312 123.8(18) |
| Ag12 Ag37 Ag10 54.67(2)  | C309 C314 C313 118.2(17) |
| Ag12 Ag37 Ag11 53.89(2)  | C312 C315 C316 115.7(15) |
| Ag12 Ag37 Ag36 57.97(3)  | C312 C315 C317 113.6(14) |
| Ag12 Ag37 Ag38 109.21(3) | C317 C315 C316 99.5(16)  |
| Ag12 Ag37 Ag67 67.21(3)  | C318 C315 C312 111.6(15) |
| Ag36 Ag37 Ag10 59.46(3)  | C318 C315 C316 103.5(12) |
| Ag36 Ag37 Ag11 103.90(3) | C318 C315 C317 112.1(16) |
| Ag36 Ag37 Ag38 140.54(4) | C321 C320 S12 121.1(12)  |

|                          |                          |
|--------------------------|--------------------------|
| Ag36 Ag37 Ag67 112.10(4) | C321 C320 C325 120.4(14) |
| Ag38 Ag37 Ag67 91.77(4)  | C325 C320 S12 118.2(11)  |
| S8 Ag37 Ag10 74.27(7)    | C320 C321 C322 119.4(17) |
| S8 Ag37 Ag11 93.05(7)    | C321 C322 C323 120.0(18) |
| S8 Ag37 Ag12 128.32(8)   | C322 C323 C326 126.4(18) |
| S8 Ag37 Ag36 104.58(8)   | C324 C323 C322 115.7(18) |
| S8 Ag37 Ag38 50.98(7)    | C324 C323 C326 117.8(18) |
| S8 Ag37 Ag67 141.49(8)   | C323 C324 C325 127.2(19) |
| S8 Ag37 S37 94.21(10)    | C324 C325 C320 116.7(16) |
| S34 Ag37 Ag10 112.84(7)  | C323 C326 C327 103.9(17) |
| S34 Ag37 Ag11 136.92(6)  | C328 C326 C323 105.6(18) |
| S34 Ag37 Ag12 84.93(6)   | C328 C326 C327 93.3(17)  |
| S34 Ag37 Ag36 53.59(7)   | C329 C326 C323 111(2)    |
| S34 Ag37 Ag38 163.89(7)  | C329 C326 C327 116(2)    |
| S34 Ag37 Ag67 86.59(7)   | C329 C326 C328 124(2)    |
| S34 Ag37 S8 126.01(10)   | C331 C330 S10 119.7(9)   |
| S34 Ag37 S37 117.90(10)  | C331 C330 C335 118.0(11) |
| S37 Ag37 Ag10 123.44(8)  | C335 C330 S10 121.4(9)   |
| S37 Ag37 Ag11 70.00(7)   | C330 C331 C332 120.0(13) |
| S37 Ag37 Ag12 106.49(6)  | C333 C332 C331 122.4(14) |
| S37 Ag37 Ag36 160.65(7)  | C332 C333 C336 122.1(14) |
| S37 Ag37 Ag38 51.68(7)   | C334 C333 C332 116.6(15) |
| S37 Ag37 Ag67 48.57(6)   | C334 C333 C336 121.2(16) |
| Ag11 Ag38 Ag37 61.51(3)  | C333 C334 C335 122.9(17) |
| Ag11 Ag38 Ag66 66.71(3)  | C330 C335 C334 119.9(14) |
| Ag37 Ag38 Ag66 91.35(3)  | C333 C336 C337 104.6(16) |
| Ag39 Ag38 Ag11 59.56(3)  | C338 C336 C333 109.9(18) |
| Ag39 Ag38 Ag37 91.74(3)  | C338 C336 C337 102.2(18) |
| Ag39 Ag38 Ag42 57.16(3)  | C338 C336 C339 109(2)    |
| Ag39 Ag38 Ag52 61.26(3)  | C339 C336 C333 113.0(18) |
| Ag39 Ag38 Ag66 115.98(4) | C339 C336 C337 117.1(19) |
| Ag42 Ag38 Ag11 55.76(2)  | C341 C340 S38 119.7(14)  |
| Ag42 Ag38 Ag37 117.28(3) | C341 C340 C345 120.4(19) |
| Ag42 Ag38 Ag52 69.74(4)  | C345 C340 S38 119.8(14)  |
| Ag42 Ag38 Ag66 65.13(3)  | C340 C341 C342 114(2)    |
| Ag52 Ag38 Ag11 114.23(4) | C343 C342 C341 126(3)    |
| Ag52 Ag38 Ag37 143.93(5) | C342 C343 C344 117(3)    |
| Ag52 Ag38 Ag66 121.01(4) | C342 C343 C346 125(3)    |
| S8 Ag38 Ag11 97.50(7)    | C344 C343 C346 116(2)    |
| S8 Ag38 Ag37 50.57(7)    | C345 C344 C343 116(2)    |



|      |           |            |      |      |      |           |
|------|-----------|------------|------|------|------|-----------|
| S8   | Ag38 Ag39 | 80.41(8)   | C340 | C345 | C344 | 124(2)    |
| S8   | Ag38 Ag42 | 136.75(8)  | C347 | C346 | C343 | 110.2(19) |
| S8   | Ag38 Ag52 | 98.62(8)   | C347 | C346 | C348 | 105.7(19) |
| S8   | Ag38 Ag66 | 140.35(8)  | C347 | C346 | C501 | 105.9(18) |
| S8   | Ag38 S13  | 124.62(9)  | C348 | C346 | C343 | 103.9(19) |
| S8   | Ag38 S37  | 93.98(10)  | C501 | C346 | C343 | 113.6(19) |
| S13  | Ag38 Ag11 | 135.62(7)  | C501 | C346 | C348 | 117.1(19) |
| S13  | Ag38 Ag37 | 157.05(8)  | C351 | C350 | S9   | 120.1(9)  |
| S13  | Ag38 Ag39 | 110.15(8)  | C351 | C350 | C355 | 118.7(11) |
| S13  | Ag38 Ag42 | 81.78(7)   | C355 | C350 | S9   | 121.2(10) |
| S13  | Ag38 Ag52 | 51.91(8)   | C350 | C351 | C352 | 120.1(13) |
| S13  | Ag38 Ag66 | 85.29(7)   | C353 | C352 | C351 | 122.6(13) |
| S13  | Ag38 S37  | 112.57(10) | C352 | C353 | C354 | 117.4(13) |
| S37  | Ag38 Ag11 | 73.40(6)   | C352 | C353 | C356 | 120.5(13) |
| S37  | Ag38 Ag37 | 51.82(7)   | C354 | C353 | C356 | 122.1(14) |
| S37  | Ag38 Ag39 | 131.10(7)  | C353 | C354 | C355 | 121.2(14) |
| S37  | Ag38 Ag42 | 107.09(7)  | C350 | C355 | C354 | 119.9(13) |
| S37  | Ag38 Ag52 | 164.06(8)  | C353 | C356 | C358 | 110.4(14) |
| S37  | Ag38 Ag66 | 47.38(7)   | C357 | C356 | C353 | 108.8(16) |
| Ag2  | Ag39 Ag10 | 65.38(3)   | C357 | C356 | C358 | 99.4(16)  |
| Ag2  | Ag39 Ag11 | 87.87(3)   | C357 | C356 | C359 | 118.8(18) |
| Ag2  | Ag39 Ag19 | 57.13(2)   | C359 | C356 | C353 | 112.2(16) |
| Ag2  | Ag39 Ag40 | 59.49(3)   | C359 | C356 | C358 | 106.5(16) |
| Ag2  | Ag39 Ag41 | 81.67(3)   | C361 | C360 | S8   | 116.5(11) |
| Ag2  | Ag39 Ag52 | 147.54(4)  | C361 | C360 | C365 | 121.9(14) |
| Ag3  | Ag39 Ag2  | 59.06(2)   | C365 | C360 | S8   | 121.6(11) |
| Ag3  | Ag39 Ag10 | 57.98(3)   | C360 | C361 | C362 | 118.3(15) |
| Ag3  | Ag39 Ag11 | 117.57(3)  | C363 | C362 | C361 | 121.8(16) |
| Ag3  | Ag39 Ag19 | 116.13(3)  | C362 | C363 | C366 | 117.9(16) |
| Ag3  | Ag39 Ag38 | 125.84(4)  | C364 | C363 | C362 | 118.9(17) |
| Ag3  | Ag39 Ag40 | 58.60(3)   | C364 | C363 | C366 | 122.4(18) |
| Ag3  | Ag39 Ag41 | 117.07(4)  | C363 | C364 | C365 | 121(2)    |
| Ag3  | Ag39 Ag52 | 117.06(4)  | C360 | C365 | C364 | 117.8(17) |
| Ag10 | Ag39 Ag19 | 92.54(3)   | C363 | C366 | C369 | 115.2(16) |
| Ag10 | Ag39 Ag52 | 143.73(4)  | C367 | C366 | C363 | 109.4(16) |
| Ag11 | Ag39 Ag10 | 60.32(3)   | C367 | C366 | C368 | 105.9(17) |
| Ag11 | Ag39 Ag19 | 58.01(2)   | C367 | C366 | C369 | 104.3(16) |
| Ag11 | Ag39 Ag52 | 117.42(4)  | C368 | C366 | C363 | 110.5(16) |
| Ag38 | Ag39 Ag2  | 149.86(4)  | C368 | C366 | C369 | 110.9(16) |
| Ag38 | Ag39 Ag10 | 91.53(3)   | C371 | C370 | S7   | 118.3(13) |

|                          |                          |
|--------------------------|--------------------------|
| Ag38 Ag39 Ag11 63.11(3)  | C375 C370 S7 119.3(15)   |
| Ag38 Ag39 Ag19 108.03(3) | C375 C370 C371 121.9(18) |
| Ag38 Ag39 Ag40 150.64(4) | C370 C371 C372 112.5(19) |
| Ag38 Ag39 Ag41 112.99(4) | C373 C372 C371 131(2)    |
| Ag38 Ag39 Ag52 61.36(3)  | C372 C373 C374 112(2)    |
| Ag40 Ag39 Ag10 110.30(3) | C372 C373 C376 123(2)    |
| Ag40 Ag39 Ag11 144.86(3) | C374 C373 C376 120.4(19) |
| Ag40 Ag39 Ag19 90.92(3)  | C373 C374 C375 112(2)    |
| Ag40 Ag39 Ag52 90.20(3)  | C370 C375 C374 120(2)    |
| Ag41 Ag39 Ag10 144.07(3) | C373 C376 C378 111.1(17) |
| Ag41 Ag39 Ag11 106.65(3) | C373 C376 C379 110.3(17) |
| Ag41 Ag39 Ag19 55.91(2)  | C377 C376 C373 102.1(17) |
| Ag41 Ag39 Ag40 59.34(3)  | C377 C376 C378 115.2(18) |
| Ag41 Ag39 Ag52 72.08(4)  | C377 C376 C379 113.7(18) |
| Ag42 Ag39 Ag2 110.65(3)  | C379 C376 C378 104.6(17) |
| Ag42 Ag39 Ag3 169.68(3)  | C381 C380 S39 119.3(12)  |
| Ag42 Ag39 Ag10 118.70(3) | C385 C380 S39 121.0(13)  |
| Ag42 Ag39 Ag11 58.39(3)  | C385 C380 C381 119.6(16) |
| Ag42 Ag39 Ag19 53.56(2)  | C382 C381 C380 113(2)    |
| Ag42 Ag39 Ag38 62.27(3)  | C383 C382 C381 133(2)    |
| Ag42 Ag39 Ag40 118.28(4) | C382 C383 C384 110(2)    |
| Ag42 Ag39 Ag41 58.94(3)  | C382 C383 C386 126.9(19) |
| Ag42 Ag39 Ag52 71.75(3)  | C384 C383 C386 122.9(18) |
| Ag52 Ag39 Ag19 117.52(4) | C385 C384 C383 124(2)    |
| Ag2 Ag40 Ag20 54.95(2)   | C384 C385 C380 119(2)    |
| Ag2 Ag40 Ag22 80.65(3)   | C383 C386 C388 109.4(17) |
| Ag2 Ag40 Ag23 60.64(3)   | C383 C386 C389 108.8(17) |
| Ag2 Ag40 Ag39 59.85(3)   | C387 C386 C383 111.8(19) |
| Ag2 Ag40 Ag55 156.28(4)  | C387 C386 C388 111.9(19) |
| Ag3 Ag40 Ag2 58.97(2)    | C387 C386 C389 100.8(19) |
| Ag3 Ag40 Ag20 113.91(3)  | C388 C386 C389 114.0(18) |
| Ag3 Ag40 Ag22 114.54(3)  | C391 C390 S6 119.4(10)   |
| Ag3 Ag40 Ag23 56.42(3)   | C395 C390 S6 121.8(11)   |
| Ag3 Ag40 Ag39 57.91(3)   | C395 C390 C391 118.8(13) |
| Ag3 Ag40 Ag41 117.04(3)  | C390 C391 C392 114.5(14) |
| Ag3 Ag40 Ag47 127.59(4)  | C393 C392 C391 126.1(18) |
| Ag3 Ag40 Ag55 122.31(4)  | C392 C393 C394 118.6(16) |
| Ag22 Ag40 Ag20 54.04(2)  | C392 C393 C396 123.5(17) |
| Ag22 Ag40 Ag23 59.27(3)  | C394 C393 C396 117.9(14) |
| Ag22 Ag40 Ag55 114.91(4) | C395 C394 C393 118.9(15) |

|                          |                          |
|--------------------------|--------------------------|
| Ag23 Ag40 Ag20 89.32(3)  | C394 C395 C390 122.9(15) |
| Ag39 Ag40 Ag20 89.37(3)  | C393 C396 C398 108.0(19) |
| Ag39 Ag40 Ag22 138.07(3) | C393 C396 C399 112.7(18) |
| Ag39 Ag40 Ag23 106.50(3) | C397 C396 C393 117.2(19) |
| Ag39 Ag40 Ag55 99.50(3)  | C397 C396 C398 100(2)    |
| Ag41 Ag40 Ag2 82.19(3)   | C397 C396 C399 113(2)    |
| Ag41 Ag40 Ag20 55.79(2)  | C399 C396 C398 104(2)    |
| Ag41 Ag40 Ag22 103.98(3) | C6AA C400 S41 119.6(8)   |
| Ag41 Ag40 Ag23 140.31(3) | C6AA C400 C408 120.0     |
| Ag41 Ag40 Ag39 60.00(3)  | C408 C400 S41 120.0(8)   |
| Ag41 Ag40 Ag55 76.79(3)  | C7AA C6AA C400 120.0     |
| Ag46 Ag40 Ag2 106.78(3)  | C6AA C7AA C403 120.0     |
| Ag46 Ag40 Ag3 165.63(3)  | C7AA C403 C407 120.0     |
| Ag46 Ag40 Ag20 51.83(2)  | C7AA C403 C404 119.9(13) |
| Ag46 Ag40 Ag22 57.53(3)  | C407 C403 C404 119.5(13) |
| Ag46 Ag40 Ag23 116.77(3) | C408 C407 C403 120.0     |
| Ag46 Ag40 Ag39 118.42(3) | C407 C408 C400 120.0     |
| Ag46 Ag40 Ag41 58.62(3)  | C405 C404 C403 106.8(19) |
| Ag46 Ag40 Ag47 61.51(3)  | C405 C404 C491 106(2)    |
| Ag46 Ag40 Ag55 71.28(3)  | C406 C404 C403 112.2(19) |
| Ag47 Ag40 Ag2 141.15(4)  | C406 C404 C405 119(2)    |
| Ag47 Ag40 Ag20 103.63(3) | C406 C404 C491 107(2)    |
| Ag47 Ag40 Ag22 61.60(3)  | C491 C404 C403 104.7(18) |
| Ag47 Ag40 Ag23 90.34(3)  | C410 C409 S42 123.5(8)   |
| Ag47 Ag40 Ag39 158.98(4) | C410 C409 C414 120.0     |
| Ag47 Ag40 Ag41 114.02(4) | C414 C409 S42 116.5(8)   |
| Ag47 Ag40 Ag55 59.86(3)  | C411 C410 C409 120.0     |
| Ag55 Ag40 Ag20 118.33(4) | C410 C411 C412 120.0     |
| Ag55 Ag40 Ag23 142.20(4) | C411 C412 C413 120.0     |
| Ag19 Ag41 Ag20 58.85(2)  | C411 C412 C415 116.7(13) |
| Ag19 Ag41 Ag43 59.24(3)  | C413 C412 C415 122.9(13) |
| Ag19 Ag41 Ag45 142.45(4) | C412 C413 C414 120.0     |
| Ag19 Ag41 Ag52 114.78(3) | C413 C414 C409 120.0     |
| Ag19 Ag41 Ag54 108.78(3) | C412 C415 C417 115.0(17) |
| Ag19 Ag41 Ag55 150.92(4) | C416 C415 C412 108.5(16) |
| Ag20 Ag41 Ag43 89.97(3)  | C416 C415 C417 113.3(18) |
| Ag20 Ag41 Ag45 104.70(3) | C416 C415 C494 105.2(18) |
| Ag20 Ag41 Ag52 150.74(4) | C494 C415 C412 107.0(17) |
| Ag20 Ag41 Ag54 144.87(4) | C494 C415 C417 107.4(18) |
| Ag20 Ag41 Ag55 112.29(3) | C420 C418 P5 115.6(10)   |

|                          |                          |
|--------------------------|--------------------------|
| Ag39 Ag41 Ag19 69.76(3)  | C420 C418 C422 120.0     |
| Ag39 Ag41 Ag20 99.41(3)  | C422 C418 P5 124.3(10)   |
| Ag39 Ag41 Ag43 112.36(3) | C421 C420 C418 120.0     |
| Ag39 Ag41 Ag45 147.23(3) | C420 C421 C5AA 120.0     |
| Ag39 Ag41 Ag52 54.90(3)  | C423 C5AA C421 120.0     |
| Ag39 Ag41 Ag54 106.55(3) | C422 C423 C5AA 120.0     |
| Ag39 Ag41 Ag55 85.99(3)  | C423 C422 C418 120.0     |
| Ag40 Ag41 Ag19 100.20(3) | C429 C424 P5 120.8(8)    |
| Ag40 Ag41 Ag20 72.23(3)  | C429 C424 C425 120.0     |
| Ag40 Ag41 Ag39 60.66(3)  | C425 C424 P5 119.2(8)    |
| Ag40 Ag41 Ag43 158.41(4) | C424 C429 C428 120.0     |
| Ag40 Ag41 Ag45 106.24(3) | C429 C428 C427 120.0     |
| Ag40 Ag41 Ag52 81.83(3)  | C426 C427 C428 120.0     |
| Ag40 Ag41 Ag54 141.70(3) | C425 C426 C427 120.0     |
| Ag40 Ag41 Ag55 52.44(2)  | C426 C425 C424 120.0     |
| Ag42 Ag41 Ag19 58.31(2)  | C435 C430 P5 115.5(10)   |
| Ag42 Ag41 Ag20 117.16(3) | C435 C430 C431 120.0     |
| Ag42 Ag41 Ag39 57.88(3)  | C431 C430 P5 124.3(10)   |
| Ag42 Ag41 Ag40 118.54(4) | C430 C435 C434 120.0     |
| Ag42 Ag41 Ag43 58.53(3)  | C435 C434 C433 120.0     |
| Ag42 Ag41 Ag45 125.34(4) | C432 C433 C434 120.0     |
| Ag42 Ag41 Ag52 64.08(3)  | C431 C432 C433 120.0     |
| Ag42 Ag41 Ag54 61.84(3)  | C432 C431 C430 120.0     |
| Ag42 Ag41 Ag55 121.74(3) | C437 C436 S40 118.4(8)   |
| Ag43 Ag41 Ag52 111.65(3) | C437 C436 C441 120.0     |
| Ag43 Ag41 Ag55 148.98(4) | C441 C436 S40 121.6(8)   |
| Ag45 Ag41 Ag43 89.74(3)  | C438 C437 C436 120.0     |
| Ag45 Ag41 Ag52 95.22(3)  | C437 C438 C439 120.0     |
| Ag45 Ag41 Ag55 64.52(3)  | C438 C439 C440 120.0     |
| Ag46 Ag41 Ag19 116.60(3) | C438 C439 C442 124.3(13) |
| Ag46 Ag41 Ag20 57.77(2)  | C440 C439 C442 115.6(13) |
| Ag46 Ag41 Ag39 119.30(3) | C441 C440 C439 120.0     |
| Ag46 Ag41 Ag40 58.85(3)  | C440 C441 C436 120.0     |
| Ag46 Ag41 Ag42 174.46(4) | C443 C442 C439 109.6(19) |
| Ag46 Ag41 Ag43 121.76(3) | C443 C442 C444 102(2)    |
| Ag46 Ag41 Ag45 59.84(3)  | C444 C442 C439 118(2)    |
| Ag46 Ag41 Ag52 118.93(3) | C445 C442 C439 108.9(19) |
| Ag46 Ag41 Ag54 123.46(4) | C445 C442 C443 113(2)    |
| Ag46 Ag41 Ag55 61.30(2)  | C445 C442 C444 104(2)    |
| Ag52 Ag41 Ag55 57.70(3)  | C447 C446 S5 121.3(9)    |

|                          |                          |
|--------------------------|--------------------------|
| Ag54 Ag41 Ag43 58.55(3)  | C447 C446 C451 119.9(12) |
| Ag54 Ag41 Ag45 63.66(3)  | C451 C446 S5 118.8(10)   |
| Ag54 Ag41 Ag52 63.67(3)  | C446 C447 C448 122.1(14) |
| Ag54 Ag41 Ag55 93.03(3)  | C447 C448 C449 118.8(15) |
| Ag11 Ag42 Ag18 64.56(3)  | C448 C449 C450 117.1(14) |
| Ag11 Ag42 Ag19 66.70(3)  | C448 C449 C452 120.3(14) |
| Ag11 Ag42 Ag38 64.37(3)  | C450 C449 C452 122.1(14) |
| Ag11 Ag42 Ag41 114.39(3) | C451 C450 C449 122.7(16) |
| Ag11 Ag42 Ag43 120.85(3) | C450 C451 C446 118.0(15) |
| Ag11 Ag42 Ag52 110.09(3) | C453 C452 C449 107.5(15) |
| Ag11 Ag42 Ag53 122.21(4) | C454 C452 C449 106.9(15) |
| Ag11 Ag42 Ag54 175.42(3) | C454 C452 C453 109.5(17) |
| Ag11 Ag42 Ag66 69.13(3)  | C455 C452 C449 112.9(16) |
| Ag18 Ag42 Ag43 62.93(3)  | C455 C452 C453 106.8(17) |
| Ag18 Ag42 Ag52 172.96(4) | C455 C452 C454 112.9(18) |
| Ag18 Ag42 Ag54 120.01(3) | C457 C456 S4 121.1(11)   |
| Ag18 Ag42 Ag66 63.93(3)  | C457 C456 C461 120.5(14) |
| Ag19 Ag42 Ag18 60.56(3)  | C461 C456 S4 118.3(11)   |
| Ag19 Ag42 Ag38 123.75(3) | C456 C457 C458 120.9(15) |
| Ag19 Ag42 Ag43 65.14(3)  | C457 C458 C459 119.1(15) |
| Ag19 Ag42 Ag52 122.53(3) | C458 C459 C462 122.2(14) |
| Ag19 Ag42 Ag53 151.49(3) | C460 C459 C458 117.9(14) |
| Ag19 Ag42 Ag54 114.64(3) | C460 C459 C462 119.7(14) |
| Ag19 Ag42 Ag66 119.36(3) | C461 C460 C459 122.5(18) |
| Ag38 Ag42 Ag18 116.82(3) | C460 C461 C456 119.0(17) |
| Ag38 Ag42 Ag43 170.42(4) | C459 C462 C464 107.2(14) |
| Ag38 Ag42 Ag52 56.15(3)  | C463 C462 C459 108.5(15) |
| Ag38 Ag42 Ag54 112.26(3) | C463 C462 C464 111.6(16) |
| Ag38 Ag42 Ag66 64.92(3)  | C463 C462 C465 112.3(15) |
| Ag39 Ag42 Ag11 63.87(3)  | C465 C462 C459 111.8(14) |
| Ag39 Ag42 Ag18 121.02(3) | C465 C462 C464 105.4(16) |
| Ag39 Ag42 Ag19 74.19(3)  | C1BA C466 S3 116.3(6)    |
| Ag39 Ag42 Ag38 60.57(3)  | C1BA C466 C2BA 120.0     |
| Ag39 Ag42 Ag41 63.17(3)  | C2BA C466 S3 123.7(6)    |
| Ag39 Ag42 Ag43 128.47(4) | C489 C1BA C466 120.0     |
| Ag39 Ag42 Ag52 57.13(3)  | C488 C489 C1BA 120.0     |
| Ag39 Ag42 Ag53 134.27(3) | C489 C488 C467 120.0     |
| Ag39 Ag42 Ag54 111.96(3) | C489 C488 C503 120.0(10) |
| Ag39 Ag42 Ag66 118.75(3) | C467 C488 C503 119.7(10) |
| Ag41 Ag42 Ag18 118.25(3) | C2BA C467 C488 120.0     |

|                          |                          |
|--------------------------|--------------------------|
| Ag41 Ag42 Ag19 63.93(3)  | C467 C2BA C466 120.0     |
| Ag41 Ag42 Ag38 115.13(3) | C469 C468 S2 124.6(9)    |
| Ag41 Ag42 Ag43 71.05(3)  | C469 C468 C473 118.6(12) |
| Ag41 Ag42 Ag52 67.70(3)  | C473 C468 S2 116.7(10)   |
| Ag41 Ag42 Ag53 122.02(3) | C468 C469 C470 120.1(14) |
| Ag41 Ag42 Ag54 63.68(3)  | C469 C470 C471 125.2(15) |
| Ag41 Ag42 Ag66 176.30(3) | C470 C471 C474 127.1(14) |
| Ag43 Ag42 Ag52 123.91(4) | C472 C471 C470 111.6(14) |
| Ag43 Ag42 Ag66 108.42(4) | C472 C471 C474 121.3(14) |
| Ag52 Ag42 Ag66 110.35(3) | C471 C472 C473 127.6(16) |
| Ag53 Ag42 Ag18 97.10(3)  | C472 C473 C468 116.7(15) |
| Ag53 Ag42 Ag38 80.93(3)  | C471 C474 C475 109.5(15) |
| Ag53 Ag42 Ag43 89.57(4)  | C471 C474 C476 114.4(16) |
| Ag53 Ag42 Ag52 81.84(3)  | C475 C474 C476 98.9(16)  |
| Ag53 Ag42 Ag54 58.91(3)  | C477 C474 C471 115.1(16) |
| Ag53 Ag42 Ag66 54.29(3)  | C477 C474 C475 108.1(17) |
| Ag54 Ag42 Ag43 62.97(3)  | C477 C474 C476 109.4(17) |
| Ag54 Ag42 Ag52 65.40(3)  | C205 C485 C498 108.9(13) |
| Ag54 Ag42 Ag66 112.72(3) | C486 C485 C205 116.0(13) |
| Ag18 Ag43 Ag19 54.40(3)  | C486 C485 C487 108.9(12) |
| Ag18 Ag43 Ag41 96.56(4)  | C486 C485 C498 104.8(10) |
| Ag18 Ag43 Ag54 108.79(4) | C487 C485 C205 114.2(14) |
| Ag19 Ag43 Ag41 53.15(3)  | C487 C485 C498 102.9(10) |
| Ag19 Ag43 Ag54 100.71(4) | C507 C490 C306 110(2)    |
| Ag42 Ag43 Ag18 55.95(3)  | C507 C490 C2AA 106.1(19) |
| Ag42 Ag43 Ag19 53.17(3)  | C507 C490 C1AA 104.8(19) |
| Ag42 Ag43 Ag41 50.42(3)  | C2AA C490 C306 105.7(18) |
| Ag42 Ag43 Ag54 57.51(3)  | C1AA C490 C306 110.8(18) |
| Ag54 Ag43 Ag41 55.22(3)  | C1AA C490 C2AA 119(2)    |
| S9 Ag43 Ag18 102.90(9)   | C488 C503 C0BA 112.7(15) |
| S9 Ag43 Ag19 59.52(8)    | C504 C503 C488 111.5(15) |
| S9 Ag43 Ag41 70.02(7)    | C504 C503 C0BA 115.3(17) |
| S9 Ag43 Ag42 107.48(8)   | C3BA C503 C488 109.3(15) |
| S9 Ag43 Ag54 118.38(8)   | C3BA C503 C504 105.2(12) |
| S9 Ag43 S27 85.66(11)    | C3BA C503 C0BA 102.0(10) |
| S27 Ag43 Ag18 162.61(8)  | C189 C0AA C499 103.1(19) |
| S27 Ag43 Ag19 121.34(9)  | C492 C0AA C189 114.5(18) |
| S27 Ag43 Ag41 71.89(8)   | C492 C0AA C499 93.8(19)  |
| S27 Ag43 Ag42 107.21(8)  | C506 C0AA C189 109.6(16) |
| S27 Ag43 Ag54 54.02(7)   | C506 C0AA C492 129.5(19) |

|                          |                         |
|--------------------------|-------------------------|
| S29 Ag43 Ag18 52.88(7)   | C506 C0AA C499 99.2(19) |
| S29 Ag43 Ag19 107.28(8)  | C500 C8AAP2 118.8(6)    |
| S29 Ag43 Ag41 136.16(8)  | C500 C8AA C732 120.0    |
| S29 Ag43 Ag42 85.93(7)   | C732 C8AAP2 121.2(6)    |
| S29 Ag43 Ag54 101.21(8)  | C9AA C500 C8AA 120.0    |
| S29 Ag43 S9 139.51(11)   | C651 C9AA C500 120.0    |
| S29 Ag43 S27 127.60(11)  | C9AA C651 C667 120.0    |
| Ag45 Ag44 Ag46 56.91(4)  | C732 C667 C651 120.0    |
| Ag45 Ag44 Ag58 104.96(5) | C667 C732 C8AA 120.0    |
| Ag46 Ag44 Ag58 51.69(4)  |                         |

**Table S7. Bond Lengths for Ag<sub>70</sub>-TPTP.**

| Atom | Atom | Length/Å   | Atom | Atom | Length/Å  |
|------|------|------------|------|------|-----------|
| Ag01 | Ag04 | 2.7627(19) | C45  | C3BA | 1.3900    |
| Ag01 | Ag05 | 2.788(2)   | C3BA | C77  | 1.3900    |
| Ag01 | Ag07 | 2.758(2)   | C77  | C38  | 1.3900    |
| Ag01 | Ag08 | 2.785(2)   | C77  | C4HA | 1.534(10) |
| Ag01 | Ag09 | 2.8123(18) | C38  | C4BA | 1.3900    |
| Ag01 | Ag0C | 2.9093(19) | C0CA | C1CA | 1.3900    |
| Ag01 | Ag0E | 2.806(2)   | C0CA | C17  | 1.3900    |
| Ag01 | Ag0F | 3.368(2)   | C1CA | C273 | 1.3900    |
| Ag01 | Ag0H | 2.923(2)   | C273 | C280 | 1.3900    |
| Ag01 | Ag0Q | 3.356(2)   | C280 | C2CA | 1.3900    |
| Ag02 | Ag05 | 2.811(2)   | C280 | C6PA | 1.525(10) |
| Ag02 | Ag0D | 2.952(2)   | C2CA | C17  | 1.3900    |
| Ag02 | Ag0J | 2.845(2)   | C5AA | C3AA | 1.3900    |
| Ag02 | Ag0R | 3.093(2)   | C5AA | C9CA | 1.3900    |
| Ag02 | Ag0S | 2.791(2)   | C3AA | C4AA | 1.3900    |
| Ag02 | Ag0V | 2.819(3)   | C4AA | C0DA | 1.3900    |
| Ag02 | Ag14 | 2.968(2)   | C0DA | C24  | 1.3900    |
| Ag02 | Ag18 | 3.278(3)   | C24  | C9CA | 1.3900    |
| Ag02 | Ag1B | 3.054(3)   | C24  | C4MA | 1.533(9)  |
| Ag02 | Ag1D | 3.138(3)   | C7DA | C6DA | 1.3900    |
| Ag02 | Ag1T | 3.067(3)   | C7DA | C102 | 1.3900    |
| Ag03 | Ag04 | 2.7504(19) | C6DA | C68  | 1.3900    |
| Ag03 | Ag0G | 2.868(2)   | C68  | C91  | 1.3900    |
| Ag03 | Ag0I | 3.004(2)   | C91  | C5DA | 1.3900    |
| Ag03 | Ag0N | 2.835(2)   | C91  | C178 | 1.47(3)   |
| Ag03 | Ag0O | 2.823(2)   | C5DA | C102 | 1.3900    |
| Ag03 | Ag0P | 2.842(2)   | C75  | C117 | 1.3900    |
| Ag03 | Ag0Z | 2.947(2)   | C75  | C284 | 1.3900    |
| Ag03 | Ag15 | 3.016(2)   | C117 | C388 | 1.3900    |
| Ag03 | Ag1E | 3.027(2)   | C388 | C118 | 1.3900    |
| Ag03 | Ag1K | 3.112(3)   | C118 | C186 | 1.3900    |
| Ag04 | Ag07 | 2.944(2)   | C118 | C10A | 1.535(9)  |
| Ag04 | Ag09 | 3.018(2)   | C186 | C284 | 1.3900    |
| Ag04 | Ag0E | 2.950(2)   | C4EA | C8BA | 1.3900    |
| Ag04 | Ag0G | 2.924(2)   | C4EA | C7BA | 1.3900    |
| Ag04 | Ag0I | 2.996(2)   | C8BA | C9BA | 1.3900    |
| Ag04 | Ag0N | 2.941(2)   | C9BA | C5EA | 1.3900    |
| Ag04 | Ag0O | 3.079(2)   | C5EA | C6BA | 1.3900    |



|      |      |            |      |      |           |
|------|------|------------|------|------|-----------|
| Ag04 | Ag0P | 3.118(2)   | C5EA | C4IA | 1.528(10) |
| Ag04 | Ag0Q | 2.933(2)   | C6BA | C7BA | 1.3900    |
| Ag05 | Ag07 | 2.971(2)   | C7EA | C328 | 1.3900    |
| Ag05 | Ag08 | 2.930(2)   | C7EA | C478 | 1.3900    |
| Ag05 | Ag09 | 2.987(2)   | C328 | C232 | 1.3900    |
| Ag05 | Ag0D | 2.928(2)   | C232 | C218 | 1.3900    |
| Ag05 | Ag0J | 2.931(2)   | C218 | C503 | 1.3900    |
| Ag05 | Ag0R | 2.944(2)   | C218 | C84  | 1.54(2)   |
| Ag05 | Ag0S | 3.239(2)   | C503 | C478 | 1.3900    |
| Ag05 | Ag0V | 2.927(2)   | C404 | C464 | 1.3900    |
| Ag06 | Ag07 | 2.764(2)   | C404 | C584 | 1.3900    |
| Ag06 | Ag0G | 2.867(2)   | C464 | C452 | 1.3900    |
| Ag06 | Ag0J | 2.839(2)   | C452 | C6CA | 1.3900    |
| Ag06 | Ag0K | 2.792(2)   | C6CA | C1BA | 1.3900    |
| Ag06 | Ag0L | 2.992(2)   | C6CA | C152 | 1.54(3)   |
| Ag06 | Ag0X | 2.874(2)   | C1BA | C584 | 1.3900    |
| Ag06 | Ag16 | 2.955(3)   | C5BA | C0AA | 1.3900    |
| Ag06 | Ag1A | 3.076(2)   | C5BA | C10  | 1.3900    |
| Ag06 | Ag1F | 3.009(3)   | C0AA | C64  | 1.3900    |
| Ag06 | Ag1R | 3.230(3)   | C64  | C20  | 1.3900    |
| Ag07 | Ag09 | 3.042(2)   | C20  | C21  | 1.3900    |
| Ag07 | Ag0F | 2.914(2)   | C20  | C29  | 1.531(9)  |
| Ag07 | Ag0G | 2.916(2)   | C21  | C10  | 1.3900    |
| Ag07 | Ag0J | 2.931(2)   | C129 | C8CA | 1.3900    |
| Ag07 | Ag0K | 3.056(2)   | C129 | C293 | 1.3900    |
| Ag07 | Ag0L | 3.005(2)   | C8CA | C3DA | 1.3900    |
| Ag07 | Ag0X | 3.088(2)   | C3DA | C417 | 1.3900    |
| Ag08 | Ag09 | 2.877(2)   | C417 | C82  | 1.3900    |
| Ag08 | Ag0E | 2.930(2)   | C417 | C    | 1.528(9)  |
| Ag08 | Ag0M | 2.750(2)   | C82  | C293 | 1.3900    |
| Ag08 | Ag0U | 2.928(2)   | C4DA | C25  | 1.3900    |
| Ag08 | Ag0V | 2.907(3)   | C4DA | C3EA | 1.3900    |
| Ag08 | Ag10 | 2.904(2)   | C25  | C61  | 1.3900    |
| Ag08 | Ag11 | 3.334(2)   | C61  | C9EA | 1.3900    |
| Ag08 | Ag17 | 2.897(3)   | C9EA | C323 | 1.3900    |
| Ag09 | Ag0B | 2.7634(19) | C9EA | C0KA | 1.521(9)  |
| Ag09 | Ag0E | 2.955(2)   | C323 | C3EA | 1.3900    |
| Ag09 | Ag0K | 2.981(2)   | C35  | C0FA | 1.56(3)   |
| Ag09 | Ag0O | 2.994(2)   | C110 | C6EA | 1.3900    |
| Ag09 | Ag0S | 2.975(3)   | C110 | C166 | 1.3900    |

|      |      |          |      |      |           |
|------|------|----------|------|------|-----------|
| Ag09 | Ag0W | 2.990(2) | C6EA | C23  | 1.3900    |
| Ag09 | Ag11 | 3.038(2) | C23  | C0FA | 1.3900    |
| Ag0A | Ag0E | 2.802(2) | C0FA | C329 | 1.3900    |
| Ag0A | Ag0N | 2.823(2) | C329 | C166 | 1.3900    |
| Ag0A | Ag0T | 2.927(2) | C1FA | C2FA | 1.3900    |
| Ag0A | Ag0U | 2.812(2) | C1FA | C145 | 1.3900    |
| Ag0A | Ag0W | 2.799(3) | C2FA | C444 | 1.3900    |
| Ag0A | Ag12 | 2.960(2) | C444 | C583 | 1.3900    |
| Ag0A | Ag13 | 3.122(2) | C583 | C305 | 1.3900    |
| Ag0A | Ag1I | 2.992(3) | C583 | C263 | 1.544(10) |
| Ag0A | Ag1P | 3.121(3) | C305 | C145 | 1.3900    |
| Ag0A | Ag1V | 3.083(3) | C550 | C252 | 1.3900    |
| Ag0B | Ag0K | 2.783(2) | C550 | C574 | 1.3900    |
| Ag0B | Ag0O | 2.789(2) | C252 | C332 | 1.3900    |
| Ag0B | Ag0S | 2.774(2) | C332 | C4FA | 1.3900    |
| Ag0B | Ag0W | 2.781(3) | C4FA | C134 | 1.3900    |
| Ag0B | Ag11 | 2.848(2) | C4FA | C734 | 1.526(10) |
| Ag0B | Ag1U | 2.950(4) | C134 | C574 | 1.3900    |
| Ag0B | Ag1  | 2.816(3) | C484 | C3CA | 1.3900    |
| Ag0B | Ag2  | 3.255(5) | C484 | C4CA | 1.3900    |
| Ag0B | Ag2A | 2.927(9) | C3CA | C392 | 1.3900    |
| Ag0B | Ag2B | 2.963(8) | C392 | C168 | 1.3900    |
| Ag0C | Ag0F | 3.147(2) | C168 | C640 | 1.3900    |
| Ag0C | Ag0H | 2.976(3) | C168 | C0OA | 1.532(9)  |
| Ag0C | S01Z | 2.767(6) | C640 | C4CA | 1.3900    |
| Ag0C | S023 | 2.501(6) | C1EA | C6FA | 1.3900    |
| Ag0C | S024 | 2.466(6) | C1EA | C2EA | 1.3900    |
| Ag0D | Ag0J | 2.998(2) | C6FA | C5FA | 1.3900    |
| Ag0D | Ag0L | 3.167(2) | C5FA | C3FA | 1.3900    |
| Ag0D | Ag0R | 2.947(2) | C3FA | C536 | 1.3900    |
| Ag0D | Ag1D | 3.081(3) | C3FA | C226 | 1.64(3)   |
| Ag0D | S01Z | 2.626(6) | C536 | C2EA | 1.3900    |
| Ag0D | S025 | 2.645(6) | C414 | C616 | 1.3900    |
| Ag0D | S028 | 2.636(6) | C414 | C470 | 1.3900    |
| Ag0E | Ag0N | 2.951(2) | C616 | C57  | 1.3900    |
| Ag0E | Ag0T | 2.910(3) | C57  | C9AA | 1.3900    |
| Ag0E | Ag0U | 2.912(2) | C9AA | C529 | 1.3900    |
| Ag0E | Ag0W | 3.267(2) | C9AA | C2LA | 1.528(10) |
| Ag0E | Ag13 | 2.935(3) | C529 | C470 | 1.3900    |
| Ag0F | Ag0L | 3.032(3) | C402 | C187 | 1.3900    |

|                    |                     |
|--------------------|---------------------|
| Ag0F Ag0Q 3.378(3) | C402 C0BA 1.3900    |
| Ag0F Ag0X 3.186(2) | C187 C438 1.3900    |
| Ag0F S01Z 2.447(6) | C438 C201 1.3900    |
| Ag0F S020 2.402(6) | C201 C200 1.3900    |
| Ag0G Ag0K 2.948(2) | C201 C1HA 1.532(10) |
| Ag0G Ag0O 2.998(2) | C200 C0BA 1.3900    |
| Ag0G Ag0P 3.105(2) | C7FA C319 1.3900    |
| Ag0G Ag0X 3.147(2) | C7FA C322 1.3900    |
| Ag0G Ag0Z 3.107(2) | C319 C104 1.3900    |
| Ag0G Ag1A 3.101(3) | C104 C2DA 1.3900    |
| Ag0G Ag1R 3.283(3) | C2DA C364 1.3900    |
| Ag0H Ag0Q 3.301(2) | C2DA C8NA 1.522(10) |
| Ag0H S021 2.826(6) | C364 C322 1.3900    |
| Ag0H S023 2.459(6) | C0EA C160 1.3900    |
| Ag0H S027 2.437(6) | C0EA C195 1.3900    |
| Ag0I Ag0N 3.190(2) | C160 C272 1.3900    |
| Ag0I Ag0P 3.114(3) | C272 C410 1.3900    |
| Ag0I Ag0Q 3.088(2) | C410 C389 1.3900    |
| Ag0I Ag0T 3.056(2) | C410 C0NA 1.541(10) |
| Ag0I S021 2.747(5) | C389 C195 1.3900    |
| Ag0I S022 2.542(6) | C66 C8FA 1.3900     |
| Ag0I S02D 2.602(7) | C66 C78 1.3900      |
| Ag0J Ag0K 2.909(2) | C8FA C246 1.3900    |
| Ag0J Ag0L 3.231(2) | C246 C244 1.3900    |
| Ag0J Ag0S 2.925(2) | C244 C94 1.3900     |
| Ag0J Ag14 3.031(3) | C244 C895 1.531(10) |
| Ag0J Ag1D 3.208(3) | C94 C78 1.3900      |
| Ag0J Ag1F 3.236(3) | C189 C222 1.3900    |
| Ag0K Ag0O 2.920(3) | C189 C409 1.3900    |
| Ag0K Ag0S 2.997(2) | C222 C701 1.3900    |
| Ag0K Ag1A 2.955(2) | C701 C317 1.3900    |
| Ag0K Ag1F 2.914(3) | C317 C233 1.3900    |
| Ag0K Ag1U 3.107(3) | C317 C736 1.546(10) |
| Ag0L Ag0X 2.989(2) | C233 C409 1.3900    |
| Ag0L S01Z 2.745(5) | C9FA C107 1.3900    |
| Ag0L S028 2.640(7) | C9FA C0GA 1.3900    |
| Ag0L S02A 2.583(6) | C107 C1GA 1.3900    |
| Ag0M Ag0U 2.808(3) | C1GA C72 1.3900     |
| Ag0M Ag0V 2.796(3) | C72 C352 1.3900     |
| Ag0M Ag10 3.072(2) | C72 C269 1.526(10)  |

|           |          |           |           |
|-----------|----------|-----------|-----------|
| Ag0M Ag11 | 2.859(2) | C352 C0GA | 1.3900    |
| Ag0M Ag17 | 3.121(3) | C2GA C34  | 1.3900    |
| Ag0M Ag1G | 3.163(3) | C2GA C262 | 1.3900    |
| Ag0M Ag1J | 3.026(2) | C34 C108  | 1.3900    |
| Ag0M Ag1N | 3.156(3) | C108 C510 | 1.3900    |
| Ag0M Ag1O | 3.002(3) | C510 C617 | 1.3900    |
| Ag0M Ag1W | 3.005(4) | C510 C492 | 1.535(10) |
| Ag0N Ag0O | 2.895(3) | C617 C262 | 1.3900    |
| Ag0N Ag0T | 2.973(3) | C89 C827  | 1.3900    |
| Ag0N Ag0W | 2.970(2) | C89 C480  | 1.3900    |
| Ag0N Ag12 | 3.109(2) | C827 C826 | 1.3900    |
| Ag0N Ag1E | 3.219(3) | C826 C154 | 1.3900    |
| Ag0O Ag0W | 2.977(2) | C154 C957 | 1.3900    |
| Ag0O Ag0Z | 2.942(2) | C154 C670 | 1.520(10) |
| Ag0O Ag1E | 2.965(3) | C957 C480 | 1.3900    |
| Ag0P Ag0Q | 3.222(2) | C71 C501  | 1.3900    |
| Ag0P Ag1L | 3.207(3) | C71 C507  | 1.3900    |
| Ag0P S022 | 2.570(6) | C501 C291 | 1.3900    |
| Ag0P S029 | 2.533(6) | C291 C225 | 1.3900    |
| Ag0Q S020 | 2.429(6) | C225 C676 | 1.3900    |
| Ag0Q S021 | 2.416(6) | C225 C146 | 1.535(10) |
| Ag0R Ag10 | 3.255(3) | C676 C507 | 1.3900    |
| Ag0R S024 | 2.546(7) | C4 C42    | 1.3900    |
| Ag0R S025 | 2.536(7) | C4 C4GA   | 1.3900    |
| Ag0R S02B | 2.701(6) | C42 C157  | 1.3900    |
| Ag0S Ag0V | 2.956(2) | C157 C3GA | 1.3900    |
| Ag0S Ag11 | 3.026(3) | C3GA C130 | 1.3900    |
| Ag0S Ag14 | 2.996(3) | C3GA C5HA | 1.541(9)  |
| Ag0S Ag1T | 3.083(5) | C130 C4GA | 1.3900    |
| Ag0S Ag2  | 2.861(4) | C5GA C237 | 1.3900    |
| Ag0T Ag13 | 2.947(3) | C5GA C330 | 1.3900    |
| Ag0T Ag1M | 3.261(3) | C237 C8GA | 1.3900    |
| Ag0T S021 | 2.671(5) | C8GA C7GA | 1.3900    |
| Ag0T S02D | 2.598(6) | C7GA C6GA | 1.3900    |
| Ag0T S02H | 2.640(7) | C7GA C289 | 1.60(3)   |
| Ag0U Ag0W | 2.983(2) | C6GA C330 | 1.3900    |
| Ag0U Ag11 | 2.990(3) | C314 C757 | 1.57(3)   |
| Ag0U Ag13 | 3.372(3) | C558 C0HA | 1.3900    |
| Ag0U Ag17 | 3.283(3) | C558 C589 | 1.3900    |
| Ag0U Ag1J | 3.278(3) | C0HA C297 | 1.3900    |

|                    |                     |
|--------------------|---------------------|
| Ag0U Ag1N 3.247(3) | C297 C41 1.3900     |
| Ag0U Ag1P 3.366(3) | C41 C9GA 1.3900     |
| Ag0V Ag10 3.159(3) | C41 C8PA 1.538(10)  |
| Ag0V Ag11 2.982(2) | C9GA C589 1.3900    |
| Ag0V Ag1G 3.223(3) | C822 C1DA 1.3900    |
| Ag0V Ag1O 3.126(3) | C822 C353 1.3900    |
| Ag0W Ag11 2.998(3) | C1DA C562 1.3900    |
| Ag0W Ag12 2.943(3) | C562 C757 1.3900    |
| Ag0W Ag1V 3.337(4) | C757 C580 1.3900    |
| Ag0W S1 2.858(12)  | C580 C353 1.3900    |
| Ag0X Ag1R 3.254(3) | C40 C495 1.3900     |
| Ag0X S029 2.525(6) | C40 C0SA 1.3900     |
| Ag0X S02A 2.643(7) | C495 C8RA 1.3900    |
| Ag0Y Ag15 3.033(3) | C8RA C7PA 1.3900    |
| Ag0Y S022 2.595(5) | C7PA C9RA 1.3900    |
| Ag0Y S02C 2.695(7) | C7PA C7RA 1.533(10) |
| Ag0Y P02P 2.417(8) | C9RA C0SA 1.3900    |
| Ag0Y S02S 2.622(7) | C155 C4HA 1.546(10) |
| Ag0Z Ag1A 3.137(3) | C4HA C255 1.540(10) |
| Ag0Z Ag1E 2.900(3) | C4HA C348 1.541(10) |
| Ag0Z S02F 2.628(7) | C5HA C67 1.540(10)  |
| Ag0Z S02G 2.674(7) | C5HA C212 1.548(10) |
| Ag0Z S02I 2.524(7) | C5HA C6HA 1.540(10) |
| Ag10 Ag17 3.032(3) | C167 C178 1.534(10) |
| Ag10 Ag1G 3.287(3) | C178 C193 1.541(10) |
| Ag10 S024 2.587(6) | C178 C381 1.543(10) |
| Ag10 S02B 2.739(7) | C29 C36 1.550(9)    |
| Ag10 S02R 2.542(7) | C29 C46 1.539(10)   |
| Ag11 Ag1J 3.065(3) | C29 C204 1.544(9)   |
| Ag11 Ag1O 2.968(3) | C6 C209 1.3900      |
| Ag11 S1 2.869(13)  | C6 C7HA 1.3900      |
| Ag12 Ag1E 3.375(3) | C209 C3IA 1.3900    |
| Ag12 Ag1V 3.160(3) | C3IA C9HA 1.3900    |
| Ag12 S02J 2.655(7) | C9HA C8HA 1.3900    |
| Ag12 S02N 2.550(7) | C9HA C0IA 1.532(10) |
| Ag12 S02Q 2.586(9) | C8HA C7HA 1.3900    |
| Ag13 Ag17 3.318(3) | C1IA C0IA 1.539(10) |
| Ag13 S027 2.533(6) | C0IA C288 1.542(10) |
| Ag13 S02H 2.508(8) | C0IA C2IA 1.543(10) |
| Ag13 S02Y 2.676(7) | C30 C4IA 1.541(10)  |

|      |      |          |      |      |           |
|------|------|----------|------|------|-----------|
| Ag14 | Ag1D | 3.081(3) | C4IA | C207 | 1.545(10) |
| Ag14 | Ag1F | 3.284(3) | C4IA | C268 | 1.529(10) |
| Ag14 | Ag1T | 3.130(4) | C5IA | C95  | 1.539(10) |
| Ag14 | Ag2  | 3.243(5) | C95  | C106 | 1.533(10) |
| Ag14 | S02E | 2.598(7) | C95  | C150 | 1.541(10) |
| Ag14 | S02K | 2.679(7) | C2AA | C6IA | 1.540(10) |
| Ag14 | S02U | 2.756(7) | C2AA | C7IA | 1.541(10) |
| Ag15 | Ag1K | 2.903(3) | C2AA | C316 | 1.545(10) |
| Ag15 | Ag1L | 3.103(4) | C9IA | C8IA | 1.550(10) |
| Ag15 | S02C | 2.558(7) | C1JA | C8IA | 1.546(10) |
| Ag15 | S02F | 2.545(6) | C0JA | C8IA | 1.545(10) |
| Ag15 | S02S | 2.734(8) | C2JA | C11  | 1.3900    |
| Ag16 | Ag19 | 3.080(3) | C2JA | C215 | 1.3900    |
| Ag16 | Ag1C | 2.935(3) | C11  | C3JA | 1.3900    |
| Ag16 | Ag1R | 2.894(4) | C3JA | C4JA | 1.3900    |
| Ag16 | S02L | 2.655(8) | C4JA | C5JA | 1.3900    |
| Ag16 | S02M | 2.603(8) | C4JA | C6JA | 1.525(10) |
| Ag16 | S02O | 2.584(8) | C5JA | C215 | 1.3900    |
| Ag17 | S027 | 2.558(7) | C179 | C6JA | 1.547(10) |
| Ag17 | S02R | 2.529(7) | C7JA | C6JA | 1.532(10) |
| Ag17 | S02Y | 2.755(8) | C6JA | C681 | 1.552(10) |
| Ag18 | Ag1B | 2.980(3) | C8JA | C736 | 1.550(10) |
| Ag18 | S02B | 2.506(7) | C9JA | C736 | 1.554(10) |
| Ag18 | S02T | 2.441(9) | C376 | C736 | 1.564(10) |
| Ag18 | S02W | 2.656(7) | C0KA | C144 | 1.535(9)  |
| Ag19 | S02A | 2.600(6) | C0KA | C1KA | 1.541(10) |
| Ag19 | S02L | 2.666(7) | C0KA | C718 | 1.536(10) |
| Ag19 | S02M | 2.629(7) | C132 | C152 | 1.549(10) |
| Ag19 | P030 | 2.455(8) | C152 | C176 | 1.538(10) |
| Ag1A | Ag1F | 2.984(3) | C152 | C325 | 1.532(10) |
| Ag1A | Ag1R | 3.202(4) | C4KA | C6KA | 1.3900    |
| Ag1A | S02G | 2.898(7) | C4KA | C5KA | 1.3900    |
| Ag1A | S02I | 2.531(8) | C6KA | C158 | 1.3900    |
| Ag1A | S02O | 2.555(8) | C158 | C7KA | 1.3900    |
| Ag1B | Ag1D | 2.919(3) | C7KA | C181 | 1.3900    |
| Ag1B | Ag1H | 3.179(3) | C7KA | C415 | 1.526(10) |
| Ag1B | S025 | 2.563(6) | C181 | C5KA | 1.3900    |
| Ag1B | S02T | 2.593(8) | C8KA | C415 | 1.534(10) |
| Ag1B | S02Z | 2.544(9) | C275 | C415 | 1.540(10) |
| Ag1C | S028 | 2.597(6) | C385 | C415 | 1.536(10) |

|                     |                     |
|---------------------|---------------------|
| Ag1C S02K 2.528(7)  | C269 C9KA 1.542(10) |
| Ag1C S02M 2.410(7)  | C269 C380 1.547(10) |
| Ag1D S028 2.548(7)  | C269 C549 1.543(10) |
| Ag1D S02K 2.677(6)  | C0LA C2LA 1.551(10) |
| Ag1D S02Z 2.484(8)  | C1LA C2LA 1.548(10) |
| Ag1E Ag1K 3.252(4)  | C2LA C735 1.541(10) |
| Ag1E S02F 2.595(8)  | C214 C226 1.548(10) |
| Ag1E S02J 2.766(8)  | C226 C331 1.546(10) |
| Ag1E S02Q 2.491(7)  | C226 C717 1.548(10) |
| Ag1F S02K 2.622(7)  | C5LA C304 1.559(10) |
| Ag1F S02O 2.585(7)  | C5LA C358 1.555(10) |
| Ag1F S02U 2.526(8)  | C5LA C382 1.555(10) |
| Ag1G Ag1O 3.229(3)  | C6LA C16 1.548(10)  |
| Ag1G Ag1W 3.005(5)  | C6LA C7LA 1.549(10) |
| Ag1G S02B 2.519(6)  | C6LA C8LA 1.550(10) |
| Ag1G S02W 2.654(9)  | C0MA C74 1.547(10)  |
| Ag1G S035 2.435(13) | C1MA C74 1.547(10)  |
| Ag1H S02E 2.580(7)  | C9LA C74 1.543(10)  |
| Ag1H S02T 2.692(8)  | C3MA C2KA 1.557(10) |
| Ag1H S02Z 2.609(8)  | C3KA C2KA 1.546(10) |
| Ag1H P034 2.377(15) | C2MA C2KA 1.549(10) |
| Ag1I Ag1M 2.935(3)  | C53 C4MA 1.541(9)   |
| Ag1I Ag1P 2.993(4)  | C4MA C211 1.537(9)  |
| Ag1I Ag1Q 3.078(3)  | C4MA C282 1.544(9)  |
| Ag1I S02H 2.585(7)  | C C6MA 1.533(9)     |
| Ag1I S02X 2.608(8)  | C C7MA 1.544(9)     |
| Ag1I S032 2.635(9)  | C C5MA 1.536(9)     |
| Ag1J Ag1N 3.179(4)  | C9MA C84 1.546(10)  |
| Ag1J Ag1O 3.074(4)  | C55 C84 1.538(10)   |
| Ag1J S02V 2.491(7)  | C84 C8MA 1.546(10)  |
| Ag1J S031 2.631(13) | C278 C0NA 1.548(10) |
| Ag1J S1 2.466(13)   | C343 C0NA 1.549(10) |
| Ag1K S02D 2.860(7)  | C1NA C0NA 1.539(10) |
| Ag1K S02J 2.455(7)  | C2NA C4NA 1.3900    |
| Ag1K S02S 2.399(7)  | C2NA C5NA 1.3900    |
| Ag1L S029 2.615(6)  | C4NA C6NA 1.3900    |
| Ag1L S02C 2.383(7)  | C6NA C3NA 1.3900    |
| Ag1L S02G 2.476(7)  | C3NA C122 1.3900    |
| Ag1M S02D 2.481(6)  | C3NA C173 1.532(10) |
| Ag1M S02J 2.599(8)  | C122 C5NA 1.3900    |

|           |           |           |           |
|-----------|-----------|-----------|-----------|
| Ag1M S02X | 2.410(8)  | C173 C7NA | 1.550(10) |
| Ag1N Ag1W | 3.067(4)  | C173 C473 | 1.555(10) |
| Ag1N S02Y | 2.535(8)  | C173 C559 | 1.549(10) |
| Ag1N S031 | 2.614(14) | C8NA C9NA | 1.527(9)  |
| Ag1N S03B | 2.404(14) | C8NA C266 | 1.534(10) |
| Ag1O S02V | 2.604(8)  | C8NA C276 | 1.546(10) |
| Ag1O S02W | 2.594(8)  | C0OA C138 | 1.563(10) |
| Ag1O S036 | 2.694(16) | C0OA C257 | 1.533(10) |
| Ag1P Ag1V | 3.204(4)  | C0OA C553 | 1.544(10) |
| Ag1P S02Y | 2.521(7)  | C0OA C5   | 1.511(19) |
| Ag1P S031 | 2.717(13) | C0OA C2   | 1.538(19) |
| Ag1P S032 | 2.481(9)  | C0OA C1   | 1.60(2)   |
| Ag1Q S02N | 2.567(9)  | C3OA C1OA | 1.543(9)  |
| Ag1Q S02X | 2.587(9)  | C1OA C99  | 1.559(9)  |
| Ag1Q S032 | 2.730(10) | C1OA C2OA | 1.537(9)  |
| Ag1Q P038 | 2.444(8)  | C1HA C33  | 1.543(10) |
| Ag1R S029 | 2.946(7)  | C1HA C205 | 1.548(10) |
| Ag1R S02G | 2.387(7)  | C1HA C219 | 1.540(10) |
| Ag1R S02L | 2.450(8)  | C50 C671  | 1.3900    |
| Ag1S Ag1W | 3.151(4)  | C50 C192  | 1.3900    |
| Ag1S S02V | 2.573(8)  | C671 C4LA | 1.3900    |
| Ag1S S035 | 2.617(13) | C4LA C47  | 1.3900    |
| Ag1S S03B | 2.698(15) | C47 C3LA  | 1.3900    |
| Ag1S P03G | 2.41(2)   | C47 C7OA  | 1.542(10) |
| Ag1T Ag2  | 3.281(6)  | C3LA C192 | 1.3900    |
| Ag1T S02E | 2.494(8)  | C7OA C137 | 1.537(10) |
| Ag1T S02W | 2.670(10) | C7OA C3QA | 1.559(10) |
| Ag1T S036 | 2.594(15) | C7OA C229 | 1.549(10) |
| Ag1U Ag1  | 2.877(5)  | C9OA C400 | 1.3900    |
| Ag1U Ag2  | 3.014(5)  | C9OA C8OA | 1.3900    |
| Ag1U S02I | 2.483(7)  | C400 C0PA | 1.3900    |
| Ag1U S02U | 2.497(8)  | C0PA C416 | 1.3900    |
| Ag1U S36  | 2.722(16) | C416 C547 | 1.3900    |
| Ag1U Ag2A | 2.537(17) | C416 C943 | 1.543(9)  |
| Ag1V S02N | 2.469(8)  | C547 C8OA | 1.3900    |
| Ag1V S031 | 2.602(13) | C97 C1PA  | 1.3900    |
| Ag1V S1   | 2.417(13) | C97 C142  | 1.3900    |
| Ag1W S02R | 2.559(8)  | C1PA C538 | 1.3900    |
| Ag1W S035 | 2.555(12) | C538 C2PA | 1.3900    |
| Ag1W S03B | 2.516(15) | C2PA C3PA | 1.3900    |



|      |      |           |      |      |           |
|------|------|-----------|------|------|-----------|
| Ag1  | S02Q | 2.439(9)  | C2PA | C542 | 1.527(10) |
| Ag1  | S36  | 2.391(15) | C3PA | C142 | 1.3900    |
| Ag1  | Ag2A | 3.079(12) | C4PA | C171 | 1.3900    |
| Ag1  | Ag2B | 2.671(12) | C4PA | C359 | 1.3900    |
| Ag2  | S02U | 2.199(10) | C171 | C199 | 1.3900    |
| Ag2  | S036 | 2.461(16) | C199 | C235 | 1.3900    |
| S01Z | C32  | 1.825(13) | C235 | C797 | 1.3900    |
| S020 | C3AA | 1.832(12) | C235 | C458 | 1.531(10) |
| S021 | C12  | 1.765(12) | C797 | C359 | 1.3900    |
| S022 | C22  | 1.794(12) | C6PA | C112 | 1.541(10) |
| S023 | C37  | 1.794(12) | C6PA | C5PA | 1.538(10) |
| S024 | C9   | 1.761(12) | C6PA | C230 | 1.543(10) |
| S025 | C5BA | 1.782(10) | C1QA | C9PA | 1.537(10) |
| S027 | C15  | 1.751(13) | C228 | C9PA | 1.534(10) |
| S028 | C4DA | 1.791(14) | C9PA | C0QA | 1.557(10) |
| S029 | C75  | 1.748(14) | C6QA | C9QA | 1.3900    |
| S02A | C129 | 1.780(13) | C6QA | C8QA | 1.3900    |
| S02B | C7EA | 1.795(9)  | C9QA | C1RA | 1.3900    |
| S02C | C484 | 1.784(9)  | C1RA | C2RA | 1.3900    |
| S02D | C0CA | 1.796(9)  | C2RA | C0RA | 1.3900    |
| S02E | C2NA | 1.77(2)   | C2RA | C3RA | 1.537(10) |
| S02F | C4   | 1.799(13) | C0RA | C8QA | 1.3900    |
| S02G | C6   | 1.777(15) | C87  | C895 | 1.550(10) |
| S02H | C404 | 1.836(14) | C93  | C895 | 1.555(10) |
| S02I | C402 | 1.806(17) | C4RA | C895 | 1.544(10) |
| S02J | C9FA | 1.70(2)   | C6RA | C7RA | 1.553(10) |
| S02K | C2JA | 1.750(18) | C170 | C7RA | 1.552(10) |
| S02L | C2BA | 1.785(9)  | C5RA | C7RA | 1.550(10) |
| S02M | C1EA | 1.779(17) | C4OA | C825 | 1.3900    |
| S02N | C7FA | 1.782(17) | C4OA | C685 | 1.3900    |
| S02O | C7DA | 1.766(18) | C825 | C182 | 1.3900    |
| P02P | C5GA | 1.784(17) | C182 | C7SA | 1.3900    |
| P02P | C558 | 1.85(2)   | C7SA | C386 | 1.3900    |
| P02P | C822 | 1.771(15) | C7SA | C440 | 1.536(10) |
| S02Q | C4KA | 1.813(9)  | C386 | C685 | 1.3900    |
| S02R | C40  | 1.825(9)  | C287 | C6OA | 1.3900    |
| S02S | C85  | 1.794(9)  | C287 | C874 | 1.3900    |
| S02T | C414 | 1.78(2)   | C6OA | C290 | 1.3900    |
| S02U | C0EA | 1.774(19) | C290 | C162 | 1.3900    |
| S02V | C50  | 1.794(9)  | C162 | C638 | 1.3900    |

|      |      |           |      |      |           |
|------|------|-----------|------|------|-----------|
| S02W | C9OA | 1.759(9)  | C162 | C622 | 1.536(10) |
| S02X | C88  | 1.808(9)  | C638 | C874 | 1.3900    |
| S02Y | C4EA | 1.795(16) | C5OA | C686 | 1.3900    |
| S02Z | C189 | 1.66(2)   | C5OA | C5QA | 1.3900    |
| P030 | C110 | 1.781(14) | C686 | C866 | 1.3900    |
| P030 | C1FA | 1.802(16) | C866 | C7QA | 1.3900    |
| P030 | C550 | 1.763(15) | C7QA | C712 | 1.3900    |
| S031 | C105 | 1.835(9)  | C7QA | C613 | 1.531(10) |
| S032 | C66  | 1.67(2)   | C712 | C5QA | 1.3900    |
| P034 | C4PA | 1.812(10) | C140 | C260 | 1.3900    |
| P034 | C6QA | 1.76(3)   | C140 | C4SA | 1.3900    |
| P034 | C140 | 1.799(9)  | C260 | C449 | 1.3900    |
| S035 | C0TA | 1.825(9)  | C449 | C543 | 1.3900    |
| S036 | C97  | 1.791(9)  | C543 | C5SA | 1.3900    |
| P038 | C2GA | 1.816(10) | C543 | C6SA | 1.534(10) |
| P038 | C89  | 1.74(2)   | C5SA | C4SA | 1.3900    |
| P038 | C71  | 1.838(10) | C2QA | C542 | 1.555(10) |
| S03B | C5CA | 1.78(2)   | C301 | C542 | 1.547(10) |
| P03G | C4OA | 1.801(10) | C542 | C4QA | 1.544(10) |
| P03G | C287 | 1.850(10) | C105 | C8SA | 1.3900    |
| P03G | C5OA | 1.803(10) | C105 | C302 | 1.3900    |
| C9   | C13  | 1.3900    | C8SA | C499 | 1.3900    |
| C9   | C19  | 1.3900    | C499 | C208 | 1.3900    |
| C13  | C43  | 1.3900    | C208 | C517 | 1.3900    |
| C43  | C63  | 1.3900    | C208 | C476 | 1.506(9)  |
| C63  | C326 | 1.3900    | C517 | C302 | 1.3900    |
| C63  | C95  | 1.59(2)   | C476 | C425 | 1.495(9)  |
| C326 | C19  | 1.3900    | C476 | C506 | 1.528(9)  |
| C12  | C54  | 1.3900    | C476 | C920 | 1.579(10) |
| C12  | C62  | 1.3900    | C133 | C943 | 1.545(10) |
| C54  | C14  | 1.3900    | C9SA | C943 | 1.548(10) |
| C14  | C56  | 1.3900    | C313 | C943 | 1.554(10) |
| C56  | C534 | 1.3900    | C0TA | C153 | 1.3900    |
| C56  | C74  | 1.64(2)   | C0TA | C430 | 1.3900    |
| C534 | C62  | 1.3900    | C153 | C216 | 1.3900    |
| C15  | C31  | 1.3900    | C216 | C217 | 1.3900    |
| C15  | C98  | 1.3900    | C217 | C198 | 1.3900    |
| C31  | C165 | 1.3900    | C217 | C1TA | 1.540(9)  |
| C165 | C8DA | 1.3900    | C198 | C430 | 1.3900    |
| C8DA | C9DA | 1.3900    | C1TA | C183 | 1.544(10) |

|                     |                     |
|---------------------|---------------------|
| C8DA C2KA 1.57(2)   | C1TA C502 1.549(9)  |
| C9DA C98 1.3900     | C1TA C833 1.560(10) |
| C22 C65 1.3900      | S36 C2TA 1.810(9)   |
| C22 C247 1.3900     | S36 Ag2A 1.662(16)  |
| C65 C26 1.3900      | S36 Ag2B 2.204(19)  |
| C26 C18 1.3900      | C2TA C3TA 1.3900    |
| C18 C7CA 1.3900     | C2TA C642 1.3900    |
| C18 C6LA 1.562(19)  | C3TA C4TA 1.3900    |
| C7CA C247 1.3900    | C4TA C5TA 1.3900    |
| C32 C8 1.3900       | C5TA C725 1.3900    |
| C32 C1AA 1.3900     | C5TA C674 1.547(10) |
| C8 C58 1.3900       | C725 C642 1.3900    |
| C58 C59 1.3900      | C8TA C674 1.560(10) |
| C59 C27 1.3900      | C7TA C674 1.562(10) |
| C59 C2AA 1.54(2)    | C6TA C674 1.555(10) |
| C27 C1AA 1.3900     | C271 C2UA 1.3900    |
| C37 C79 1.3900      | C271 C9TA 1.3900    |
| C37 C8AA 1.3900     | C271 S1 1.765(9)    |
| C79 C6AA 1.3900     | C271 Ag2B 2.310(19) |
| C6AA C8EA 1.3900    | C2UA C1UA 1.3900    |
| C8EA C7AA 1.3900    | C2UA Ag2B 2.61(2)   |
| C8EA C8IA 1.56(2)   | C1UA C3UA 1.3900    |
| C7AA C8AA 1.3900    | C3UA C0UA 1.3900    |
| C85 C427 1.3900     | C3UA C601 1.554(9)  |
| C85 C456 1.3900     | C0UA C9TA 1.3900    |
| C427 C371 1.3900    | C9TA Ag2B 2.62(3)   |
| C371 C159 1.3900    | C601 C123 1.558(10) |
| C159 C234 1.3900    | C601 C177 1.566(10) |
| C159 C5LA 1.552(10) | C601 C4UA 1.569(10) |
| C234 C456 1.3900    | C5CA C1SA 1.3900    |
| C88 C411 1.3900     | C5CA C419 1.3900    |
| C88 C327 1.3900     | C1SA C143 1.3900    |
| C411 C3HA 1.3900    | C143 C901 1.3900    |
| C3HA C2HA 1.3900    | C901 C500 1.3900    |
| C2HA C39 1.3900     | C901 C156 1.542(10) |
| C2HA C9PA 1.517(9)  | C500 C419 1.3900    |
| C39 C327 1.3900     | C156 C514 1.541(10) |
| C2BA C45 1.3900     | C156 C652 1.550(10) |
| C2BA C4BA 1.3900    | C156 C2SA 1.557(10) |

**Table S8. Bond Angles for Ag<sub>70</sub>-TPTP.**

| <b>Atom</b> | <b>Atom</b> | <b>Atom</b> | <b>Angle/°</b> | <b>Atom</b> | <b>Atom</b> | <b>Atom</b> | <b>Angle/°</b> |
|-------------|-------------|-------------|----------------|-------------|-------------|-------------|----------------|
| Ag04        | Ag01        | Ag05        | 118.95(6)      | S02W        | Ag18        | Ag02        | 93.3(2)        |
| Ag04        | Ag01        | Ag08        | 117.07(6)      | S02W        | Ag18        | Ag1B        | 133.0(2)       |
| Ag04        | Ag01        | Ag09        | 65.55(5)       | S02A        | Ag19        | Ag16        | 82.50(15)      |
| Ag04        | Ag01        | Ag0C        | 145.22(7)      | S02A        | Ag19        | S02L        | 99.1(2)        |
| Ag04        | Ag01        | Ag0E        | 63.97(5)       | S02A        | Ag19        | S02M        | 95.8(2)        |
| Ag04        | Ag01        | Ag0F        | 89.31(5)       | S02L        | Ag19        | Ag16        | 54.47(17)      |
| Ag04        | Ag01        | Ag0H        | 108.31(7)      | S02M        | Ag19        | Ag16        | 53.54(17)      |
| Ag04        | Ag01        | Ag0Q        | 56.29(5)       | S02M        | Ag19        | S02L        | 102.8(2)       |
| Ag05        | Ag01        | Ag09        | 64.47(5)       | P030        | Ag19        | Ag16        | 152.9(2)       |
| Ag05        | Ag01        | Ag0C        | 78.64(6)       | P030        | Ag19        | S02A        | 124.1(3)       |
| Ag05        | Ag01        | Ag0E        | 117.66(6)      | P030        | Ag19        | S02L        | 110.4(3)       |
| Ag05        | Ag01        | Ag0F        | 88.86(6)       | P030        | Ag19        | S02M        | 120.7(3)       |
| Ag05        | Ag01        | Ag0H        | 132.74(6)      | Ag06        | Ag1A        | Ag0G        | 55.30(5)       |
| Ag05        | Ag01        | Ag0Q        | 147.67(6)      | Ag06        | Ag1A        | Ag0Z        | 114.96(8)      |
| Ag07        | Ag01        | Ag04        | 64.46(5)       | Ag06        | Ag1A        | Ag1R        | 61.88(7)       |
| Ag07        | Ag01        | Ag05        | 64.79(6)       | Ag0G        | Ag1A        | Ag0Z        | 59.74(6)       |
| Ag07        | Ag01        | Ag08        | 117.73(7)      | Ag0G        | Ag1A        | Ag1R        | 62.75(7)       |
| Ag07        | Ag01        | Ag09        | 66.19(5)       | Ag0K        | Ag1A        | Ag06        | 55.10(5)       |
| Ag07        | Ag01        | Ag0C        | 103.89(6)      | Ag0K        | Ag1A        | Ag0G        | 58.19(6)       |
| Ag07        | Ag01        | Ag0E        | 118.45(6)      | Ag0K        | Ag1A        | Ag0Z        | 88.72(8)       |
| Ag07        | Ag01        | Ag0F        | 55.74(5)       | Ag0K        | Ag1A        | Ag1F        | 58.76(7)       |
| Ag07        | Ag01        | Ag0H        | 145.13(7)      | Ag0K        | Ag1A        | Ag1R        | 109.89(8)      |
| Ag07        | Ag01        | Ag0Q        | 88.03(5)       | Ag0Z        | Ag1A        | Ag1R        | 92.06(8)       |
| Ag08        | Ag01        | Ag05        | 63.43(6)       | Ag1F        | Ag1A        | Ag06        | 59.52(6)       |
| Ag08        | Ag01        | Ag09        | 61.86(5)       | Ag1F        | Ag1A        | Ag0G        | 106.43(7)      |
| Ag08        | Ag01        | Ag0C        | 97.50(6)       | Ag1F        | Ag1A        | Ag0Z        | 144.67(10)     |
| Ag08        | Ag01        | Ag0E        | 63.21(6)       | Ag1F        | Ag1A        | Ag1R        | 110.78(9)      |
| Ag08        | Ag01        | Ag0F        | 148.13(7)      | S02G        | Ag1A        | Ag06        | 100.79(14)     |
| Ag08        | Ag01        | Ag0H        | 96.25(6)       | S02G        | Ag1A        | Ag0G        | 65.63(13)      |
| Ag08        | Ag01        | Ag0Q        | 148.89(7)      | S02G        | Ag1A        | Ag0K        | 122.78(15)     |
| Ag09        | Ag01        | Ag0C        | 142.69(7)      | S02G        | Ag1A        | Ag0Z        | 52.42(16)      |
| Ag09        | Ag01        | Ag0F        | 121.92(6)      | S02G        | Ag1A        | Ag1F        | 156.51(17)     |
| Ag09        | Ag01        | Ag0H        | 144.94(7)      | S02G        | Ag1A        | Ag1R        | 45.73(15)      |
| Ag09        | Ag01        | Ag0Q        | 121.84(6)      | S02I        | Ag1A        | Ag06        | 140.51(17)     |
| Ag0C        | Ag01        | Ag0F        | 59.64(5)       | S02I        | Ag1A        | Ag0G        | 101.40(17)     |
| Ag0C        | Ag01        | Ag0H        | 61.37(5)       | S02I        | Ag1A        | Ag0K        | 85.88(16)      |
| Ag0C        | Ag01        | Ag0Q        | 92.26(5)       | S02I        | Ag1A        | Ag0Z        | 51.54(16)      |
| Ag0E        | Ag01        | Ag09        | 63.47(6)       | S02I        | Ag1A        | Ag1F        | 107.98(17)     |

|                           |                           |
|---------------------------|---------------------------|
| Ag0E Ag01 Ag0C 137.65(7)  | S02I Ag1A Ag1R 140.90(18) |
| Ag0E Ag01 Ag0F 148.65(7)  | S02I Ag1A S02G 95.4(2)    |
| Ag0E Ag01 Ag0H 82.55(6)   | S02I Ag1A S02O 131.5(2)   |
| Ag0E Ag01 Ag0Q 89.97(6)   | S02O Ag1A Ag06 75.16(16)  |
| Ag0H Ag01 Ag0F 91.43(5)   | S02O Ag1A Ag0G 126.39(17) |
| Ag0H Ag01 Ag0Q 62.98(5)   | S02O Ag1A Ag0K 110.62(16) |
| Ag0Q Ag01 Ag0F 60.32(5)   | S02O Ag1A Ag0Z 160.15(17) |
| Ag05 Ag02 Ag0D 61.00(5)   | S02O Ag1A Ag1F 55.00(16)  |
| Ag05 Ag02 Ag0J 62.43(6)   | S02O Ag1A Ag1R 77.50(18)  |
| Ag05 Ag02 Ag0R 59.59(5)   | S02O Ag1A S02G 110.3(2)   |
| Ag05 Ag02 Ag0V 62.66(6)   | Ag02 Ag1B Ag1H 106.47(8)  |
| Ag05 Ag02 Ag14 119.39(7)  | Ag18 Ag1B Ag02 65.80(7)   |
| Ag05 Ag02 Ag18 117.80(7)  | Ag18 Ag1B Ag1H 92.11(9)   |
| Ag05 Ag02 Ag1B 135.20(7)  | Ag1D Ag1B Ag02 63.32(7)   |
| Ag05 Ag02 Ag1D 113.78(7)  | Ag1D Ag1B Ag18 128.58(10) |
| Ag05 Ag02 Ag1T 124.79(10) | Ag1D Ag1B Ag1H 95.15(8)   |
| Ag0D Ag02 Ag0R 58.30(5)   | S025 Ag1B Ag02 79.65(14)  |
| Ag0D Ag02 Ag14 111.36(7)  | S025 Ag1B Ag18 88.71(16)  |
| Ag0D Ag02 Ag18 113.28(6)  | S025 Ag1B Ag1D 89.28(14)  |
| Ag0D Ag02 Ag1B 80.42(6)   | S025 Ag1B Ag1H 173.60(15) |
| Ag0D Ag02 Ag1D 60.70(6)   | S025 Ag1B S02T 122.1(2)   |
| Ag0D Ag02 Ag1T 172.71(10) | S02T Ag1B Ag02 109.8(2)   |
| Ag0J Ag02 Ag0D 62.25(5)   | S02T Ag1B Ag18 51.4(2)    |
| Ag0J Ag02 Ag0R 110.61(7)  | S02T Ag1B Ag1D 147.17(19) |
| Ag0J Ag02 Ag14 62.81(6)   | S02T Ag1B Ag1H 54.47(19)  |
| Ag0J Ag02 Ag18 175.12(7)  | S02Z Ag1B Ag02 106.85(19) |
| Ag0J Ag02 Ag1B 120.02(8)  | S02Z Ag1B Ag18 142.09(19) |
| Ag0J Ag02 Ag1D 64.63(6)   | S02Z Ag1B Ag1D 53.56(19)  |
| Ag0J Ag02 Ag1T 115.26(10) | S02Z Ag1B Ag1H 52.84(19)  |
| Ag0R Ag02 Ag18 66.84(6)   | S02Z Ag1B S025 127.8(2)   |
| Ag0R Ag02 Ag1D 109.43(7)  | S02Z Ag1B S02T 104.6(3)   |
| Ag0S Ag02 Ag05 70.63(6)   | S028 Ag1C Ag16 131.75(17) |
| Ag0S Ag02 Ag0D 118.29(7)  | S02K Ag1C Ag16 113.24(18) |
| Ag0S Ag02 Ag0J 62.53(6)   | S02K Ag1C S028 91.8(2)    |
| Ag0S Ag02 Ag0R 123.18(8)  | S02M Ag1C Ag16 57.26(18)  |
| Ag0S Ag02 Ag0V 63.60(6)   | S02M Ag1C S028 120.0(2)   |
| Ag0S Ag02 Ag14 62.61(6)   | S02M Ag1C S02K 145.2(2)   |
| Ag0S Ag02 Ag18 122.33(7)  | Ag02 Ag1D Ag0J 53.26(6)   |
| Ag0S Ag02 Ag1B 153.75(8)  | Ag0D Ag1D Ag02 56.67(6)   |
| Ag0S Ag02 Ag1D 114.60(7)  | Ag0D Ag1D Ag0J 56.90(6)   |

|      |      |      |           |      |      |      |            |
|------|------|------|-----------|------|------|------|------------|
| Ag0S | Ag02 | Ag1T | 63.30(10) | Ag14 | Ag1D | Ag02 | 57.00(6)   |
| Ag0V | Ag02 | Ag0D | 116.81(7) | Ag14 | Ag1D | Ag0D | 105.01(9)  |
| Ag0V | Ag02 | Ag0J | 111.87(7) | Ag14 | Ag1D | Ag0J | 57.58(6)   |
| Ag0V | Ag02 | Ag0R | 70.12(6)  | Ag1B | Ag1D | Ag02 | 60.44(7)   |
| Ag0V | Ag02 | Ag14 | 119.63(7) | Ag1B | Ag1D | Ag0D | 80.49(7)   |
| Ag0V | Ag02 | Ag18 | 71.54(6)  | Ag1B | Ag1D | Ag0J | 112.95(9)  |
| Ag0V | Ag02 | Ag1B | 126.91(7) | Ag1B | Ag1D | Ag14 | 94.75(9)   |
| Ag0V | Ag02 | Ag1D | 176.24(8) | S028 | Ag1D | Ag02 | 107.60(16) |
| Ag0V | Ag02 | Ag1T | 70.43(8)  | S028 | Ag1D | Ag0D | 54.85(15)  |
| Ag14 | Ag02 | Ag0R | 169.33(8) | S028 | Ag1D | Ag0J | 71.76(15)  |
| Ag14 | Ag02 | Ag18 | 119.00(7) | S028 | Ag1D | Ag14 | 125.60(16) |
| Ag14 | Ag02 | Ag1B | 94.33(7)  | S028 | Ag1D | Ag1B | 124.06(15) |
| Ag14 | Ag02 | Ag1D | 60.53(7)  | S028 | Ag1D | S02K | 89.5(2)    |
| Ag14 | Ag02 | Ag1T | 62.47(8)  | S02K | Ag1D | Ag02 | 105.51(17) |
| Ag1B | Ag02 | Ag0R | 81.72(6)  | S02K | Ag1D | Ag0D | 119.88(17) |
| Ag1B | Ag02 | Ag18 | 56.01(6)  | S02K | Ag1D | Ag0J | 67.18(17)  |
| Ag1B | Ag02 | Ag1D | 56.24(6)  | S02K | Ag1D | Ag14 | 54.92(16)  |
| Ag1B | Ag02 | Ag1T | 95.85(10) | S02K | Ag1D | Ag1B | 145.58(17) |
| Ag1D | Ag02 | Ag18 | 111.86(7) | S02Z | Ag1D | Ag02 | 106.0(2)   |
| Ag1T | Ag02 | Ag0R | 127.62(9) | S02Z | Ag1D | Ag0D | 132.9(2)   |
| Ag1T | Ag02 | Ag18 | 68.91(9)  | S02Z | Ag1D | Ag0J | 151.4(2)   |
| Ag1T | Ag02 | Ag1D | 112.02(9) | S02Z | Ag1D | Ag14 | 95.35(19)  |
| Ag04 | Ag03 | Ag0G | 62.68(6)  | S02Z | Ag1D | Ag1B | 55.5(2)    |
| Ag04 | Ag03 | Ag0I | 62.58(6)  | S02Z | Ag1D | S028 | 136.9(2)   |
| Ag04 | Ag03 | Ag0N | 63.52(5)  | S02Z | Ag1D | S02K | 106.7(2)   |
| Ag04 | Ag03 | Ag0O | 67.05(5)  | Ag03 | Ag1E | Ag0N | 53.88(5)   |
| Ag04 | Ag03 | Ag0P | 67.74(6)  | Ag03 | Ag1E | Ag12 | 110.09(8)  |
| Ag04 | Ag03 | Ag0Z | 117.68(7) | Ag03 | Ag1E | Ag1K | 59.29(6)   |
| Ag04 | Ag03 | Ag15 | 152.77(7) | Ag0N | Ag1E | Ag12 | 56.21(6)   |
| Ag04 | Ag03 | Ag1E | 119.80(7) | Ag0N | Ag1E | Ag1K | 64.58(7)   |
| Ag04 | Ag03 | Ag1K | 123.51(8) | Ag0O | Ag1E | Ag03 | 56.21(5)   |
| Ag0G | Ag03 | Ag0I | 115.78(6) | Ag0O | Ag1E | Ag0N | 55.65(6)   |
| Ag0G | Ag03 | Ag0Z | 64.59(6)  | Ag0O | Ag1E | Ag12 | 85.35(7)   |
| Ag0G | Ag03 | Ag15 | 118.54(8) | Ag0O | Ag1E | Ag1K | 109.07(8)  |
| Ag0G | Ag03 | Ag1E | 113.22(8) | Ag0Z | Ag1E | Ag03 | 59.59(6)   |
| Ag0G | Ag03 | Ag1K | 173.78(8) | Ag0Z | Ag1E | Ag0N | 104.46(7)  |
| Ag0I | Ag03 | Ag15 | 97.06(7)  | Ag0Z | Ag1E | Ag0O | 60.20(6)   |
| Ag0I | Ag03 | Ag1E | 121.61(8) | Ag0Z | Ag1E | Ag12 | 144.39(9)  |
| Ag0I | Ag03 | Ag1K | 69.70(7)  | Ag0Z | Ag1E | Ag1K | 107.39(8)  |
| Ag0N | Ag03 | Ag0G | 113.57(7) | Ag1K | Ag1E | Ag12 | 91.34(9)   |

|                |           |                |            |
|----------------|-----------|----------------|------------|
| Ag0N Ag03 Ag0I | 66.15(6)  | S02F Ag1E Ag03 | 76.52(14)  |
| Ag0N Ag03 Ag0P | 121.78(7) | S02F Ag1E Ag0N | 126.55(15) |
| Ag0N Ag03 Ag0Z | 113.68(7) | S02F Ag1E Ag0O | 114.09(18) |
| Ag0N Ag03 Ag15 | 127.25(8) | S02F Ag1E Ag0Z | 56.82(18)  |
| Ag0N Ag03 Ag1E | 66.52(7)  | S02F Ag1E Ag12 | 158.6(2)   |
| Ag0N Ag03 Ag1K | 70.92(7)  | S02F Ag1E Ag1K | 74.28(17)  |
| Ag0O Ag03 Ag0G | 63.57(6)  | S02F Ag1E S02J | 109.7(2)   |
| Ag0O Ag03 Ag0I | 118.78(7) | S02J Ag1E Ag03 | 97.53(15)  |
| Ag0O Ag03 Ag0N | 61.55(6)  | S02J Ag1E Ag0N | 64.27(14)  |
| Ag0O Ag03 Ag0P | 123.06(7) | S02J Ag1E Ag0O | 118.75(16) |
| Ag0O Ag03 Ag0Z | 61.26(6)  | S02J Ag1E Ag0Z | 154.42(15) |
| Ag0O Ag03 Ag15 | 139.71(7) | S02J Ag1E Ag12 | 50.04(15)  |
| Ag0O Ag03 Ag1E | 60.79(6)  | S02J Ag1E Ag1K | 47.29(14)  |
| Ag0O Ag03 Ag1K | 117.14(7) | S02Q Ag1E Ag03 | 137.02(18) |
| Ag0P Ag03 Ag0G | 65.89(6)  | S02Q Ag1E Ag0N | 95.03(18)  |
| Ag0P Ag03 Ag0I | 64.30(6)  | S02Q Ag1E Ag0O | 82.41(18)  |
| Ag0P Ag03 Ag0Z | 116.02(8) | S02Q Ag1E Ag0Z | 112.0(2)   |
| Ag0P Ag03 Ag15 | 87.57(6)  | S02Q Ag1E Ag12 | 49.5(2)    |
| Ag0P Ag03 Ag1E | 171.59(8) | S02Q Ag1E Ag1K | 139.1(2)   |
| Ag0P Ag03 Ag1K | 116.00(8) | S02Q Ag1E S02F | 138.0(2)   |
| Ag0Z Ag03 Ag0I | 179.63(9) | S02Q Ag1E S02J | 92.4(3)    |
| Ag0Z Ag03 Ag15 | 82.78(6)  | Ag06 Ag1F Ag0J | 53.94(5)   |
| Ag0Z Ag03 Ag1E | 58.06(7)  | Ag06 Ag1F Ag14 | 109.18(8)  |
| Ag0Z Ag03 Ag1K | 109.94(7) | Ag0J Ag1F Ag14 | 55.39(6)   |
| Ag15 Ag03 Ag1E | 85.73(6)  | Ag0K Ag1F Ag06 | 56.21(6)   |
| Ag15 Ag03 Ag1K | 56.52(7)  | Ag0K Ag1F Ag0J | 56.17(6)   |
| Ag1E Ag03 Ag1K | 63.97(7)  | Ag0K Ag1F Ag14 | 88.32(8)   |
| Ag01 Ag04 Ag07 | 57.69(5)  | Ag0K Ag1F Ag1A | 60.13(7)   |
| Ag01 Ag04 Ag09 | 58.02(5)  | Ag1A Ag1F Ag06 | 61.77(6)   |
| Ag01 Ag04 Ag0E | 58.73(5)  | Ag1A Ag1F Ag0J | 106.12(8)  |
| Ag01 Ag04 Ag0G | 117.17(7) | Ag1A Ag1F Ag14 | 147.37(10) |
| Ag01 Ag04 Ag0I | 121.79(7) | S02K Ag1F Ag06 | 95.67(16)  |
| Ag01 Ag04 Ag0N | 118.41(7) | S02K Ag1F Ag0J | 67.29(15)  |
| Ag01 Ag04 Ag0O | 116.79(7) | S02K Ag1F Ag0K | 123.17(16) |
| Ag01 Ag04 Ag0P | 126.80(6) | S02K Ag1F Ag14 | 52.51(16)  |
| Ag01 Ag04 Ag0Q | 72.13(5)  | S02K Ag1F Ag1A | 151.83(18) |
| Ag03 Ag04 Ag01 | 174.39(8) | S02O Ag1F Ag06 | 75.96(16)  |
| Ag03 Ag04 Ag07 | 120.17(7) | S02O Ag1F Ag0J | 127.17(17) |
| Ag03 Ag04 Ag09 | 116.39(6) | S02O Ag1F Ag0K | 111.00(18) |
| Ag03 Ag04 Ag0E | 119.76(7) | S02O Ag1F Ag14 | 158.3(2)   |

|                          |                           |
|--------------------------|---------------------------|
| Ag03 Ag04 Ag0G 60.62(6)  | S02O Ag1F Ag1A 54.04(18)  |
| Ag03 Ag04 Ag0I 62.85(6)  | S02O Ag1F S02K 106.6(2)   |
| Ag03 Ag04 Ag0N 59.64(5)  | S02U Ag1F Ag06 142.2(2)   |
| Ag03 Ag04 Ag0O 57.61(5)  | S02U Ag1F Ag0J 99.37(18)  |
| Ag03 Ag04 Ag0P 57.53(5)  | S02U Ag1F Ag0K 87.3(2)    |
| Ag03 Ag04 Ag0Q 113.45(7) | S02U Ag1F Ag14 54.77(16)  |
| Ag07 Ag04 Ag09 61.34(5)  | S02U Ag1F Ag1A 111.2(2)   |
| Ag07 Ag04 Ag0E 108.39(7) | S02U Ag1F S02K 96.9(2)    |
| Ag07 Ag04 Ag0I 151.20(7) | S02U Ag1F S02O 132.9(2)   |
| Ag07 Ag04 Ag0O 90.29(6)  | Ag0M Ag1G Ag0V 51.92(6)   |
| Ag07 Ag04 Ag0P 95.11(6)  | Ag0M Ag1G Ag10 56.85(6)   |
| Ag09 Ag04 Ag0O 58.81(5)  | Ag0M Ag1G Ag1O 56.02(7)   |
| Ag09 Ag04 Ag0P 150.18(8) | Ag0V Ag1G Ag10 58.05(6)   |
| Ag0E Ag04 Ag09 59.35(6)  | Ag0V Ag1G Ag1O 57.96(6)   |
| Ag0E Ag04 Ag0I 90.71(7)  | Ag1O Ag1G Ag10 105.87(8)  |
| Ag0E Ag04 Ag0O 90.91(6)  | Ag1W Ag1G Ag0M 58.25(8)   |
| Ag0E Ag04 Ag0P 150.47(8) | Ag1W Ag1G Ag0V 109.20(10) |
| Ag0G Ag04 Ag07 59.58(5)  | Ag1W Ag1G Ag10 76.56(9)   |
| Ag0G Ag04 Ag09 89.34(6)  | Ag1W Ag1G Ag1O 92.74(11)  |
| Ag0G Ag04 Ag0E 146.31(7) | S02B Ag1G Ag0M 106.47(16) |
| Ag0G Ag04 Ag0I 114.30(7) | S02B Ag1G Ag0V 71.82(14)  |
| Ag0G Ag04 Ag0N 108.89(6) | S02B Ag1G Ag10 54.36(16)  |
| Ag0G Ag04 Ag0O 59.86(5)  | S02B Ag1G Ag1O 126.52(16) |
| Ag0G Ag04 Ag0P 61.76(6)  | S02B Ag1G Ag1W 121.88(19) |
| Ag0G Ag04 Ag0Q 115.05(7) | S02B Ag1G S02W 95.9(2)    |
| Ag0I Ag04 Ag09 146.26(7) | S02W Ag1G Ag0M 102.12(19) |
| Ag0I Ag04 Ag0O 111.29(6) | S02W Ag1G Ag0V 68.65(19)  |
| Ag0I Ag04 Ag0P 61.19(6)  | S02W Ag1G Ag10 124.25(19) |
| Ag0N Ag04 Ag07 143.30(7) | S02W Ag1G Ag1O 51.18(17)  |
| Ag0N Ag04 Ag09 85.26(6)  | S02W Ag1G Ag1W 140.26(19) |
| Ag0N Ag04 Ag0E 60.14(5)  | S035 Ag1G Ag0M 105.5(3)   |
| Ag0N Ag04 Ag0I 64.98(6)  | S035 Ag1G Ag0V 153.0(3)   |
| Ag0N Ag04 Ag0O 57.44(6)  | S035 Ag1G Ag10 126.3(3)   |
| Ag0N Ag04 Ag0P 109.87(6) | S035 Ag1G Ag1O 98.5(3)    |
| Ag0O Ag04 Ag0P 106.97(6) | S035 Ag1G Ag1W 54.8(3)    |
| Ag0Q Ag04 Ag07 93.19(6)  | S035 Ag1G S02B 134.2(3)   |
| Ag0Q Ag04 Ag09 130.15(6) | S035 Ag1G S02W 108.5(3)   |
| Ag0Q Ag04 Ag0E 96.04(6)  | S02E Ag1H Ag1B 85.90(15)  |
| Ag0Q Ag04 Ag0I 62.76(6)  | S02E Ag1H S02T 101.8(3)   |
| Ag0Q Ag04 Ag0N 121.49(8) | S02E Ag1H S02Z 89.9(2)    |



|      |      |      |           |      |      |      |            |
|------|------|------|-----------|------|------|------|------------|
| Ag0Q | Ag04 | Ag0O | 170.81(7) | S02T | Ag1H | Ag1B | 51.62(17)  |
| Ag0Q | Ag04 | Ag0P | 64.26(5)  | S02Z | Ag1H | Ag1B | 51.00(19)  |
| Ag01 | Ag05 | Ag02 | 169.39(7) | S02Z | Ag1H | S02T | 100.1(3)   |
| Ag01 | Ag05 | Ag07 | 57.12(5)  | P034 | Ag1H | Ag1B | 150.6(4)   |
| Ag01 | Ag05 | Ag08 | 58.23(5)  | P034 | Ag1H | S02E | 123.5(4)   |
| Ag01 | Ag05 | Ag09 | 58.15(5)  | P034 | Ag1H | S02T | 114.1(4)   |
| Ag01 | Ag05 | Ag0D | 125.93(7) | P034 | Ag1H | S02Z | 122.5(4)   |
| Ag01 | Ag05 | Ag0J | 116.16(7) | Ag0A | Ag1I | Ag1P | 62.86(8)   |
| Ag01 | Ag05 | Ag0R | 124.30(7) | Ag0A | Ag1I | Ag1Q | 109.49(10) |
| Ag01 | Ag05 | Ag0S | 114.99(6) | Ag1M | Ag1I | Ag0A | 75.17(9)   |
| Ag01 | Ag05 | Ag0V | 117.14(7) | Ag1M | Ag1I | Ag1P | 137.80(12) |
| Ag02 | Ag05 | Ag07 | 118.81(7) | Ag1M | Ag1I | Ag1Q | 92.70(9)   |
| Ag02 | Ag05 | Ag08 | 118.26(7) | Ag1P | Ag1I | Ag1Q | 96.92(10)  |
| Ag02 | Ag05 | Ag09 | 111.25(6) | S02H | Ag1I | Ag0A | 81.04(18)  |
| Ag02 | Ag05 | Ag0D | 61.88(6)  | S02H | Ag1I | Ag1M | 90.27(17)  |
| Ag02 | Ag05 | Ag0J | 59.35(6)  | S02H | Ag1I | Ag1P | 87.60(19)  |
| Ag02 | Ag05 | Ag0R | 64.97(6)  | S02H | Ag1I | Ag1Q | 169.5(2)   |
| Ag02 | Ag05 | Ag0S | 54.39(5)  | S02H | Ag1I | S02X | 122.6(3)   |
| Ag02 | Ag05 | Ag0V | 58.80(6)  | S02H | Ag1I | S032 | 121.2(3)   |
| Ag07 | Ag05 | Ag09 | 61.39(5)  | S02X | Ag1I | Ag0A | 117.5(2)   |
| Ag07 | Ag05 | Ag0S | 89.07(5)  | S02X | Ag1I | Ag1M | 51.14(18)  |
| Ag08 | Ag05 | Ag07 | 107.02(7) | S02X | Ag1I | Ag1P | 149.8(2)   |
| Ag08 | Ag05 | Ag09 | 58.17(5)  | S02X | Ag1I | Ag1Q | 53.35(18)  |
| Ag08 | Ag05 | Ag0J | 141.42(7) | S02X | Ag1I | S032 | 105.1(3)   |
| Ag08 | Ag05 | Ag0R | 97.06(7)  | S032 | Ag1I | Ag0A | 106.9(2)   |
| Ag08 | Ag05 | Ag0S | 89.82(6)  | S032 | Ag1I | Ag1M | 148.5(2)   |
| Ag09 | Ag05 | Ag0S | 56.92(5)  | S032 | Ag1I | Ag1P | 51.8(2)    |
| Ag0D | Ag05 | Ag07 | 91.49(6)  | S032 | Ag1I | Ag1Q | 56.5(2)    |
| Ag0D | Ag05 | Ag08 | 155.93(7) | Ag0M | Ag1J | Ag0U | 52.71(6)   |
| Ag0D | Ag05 | Ag09 | 145.86(7) | Ag0M | Ag1J | Ag1I | 55.98(6)   |
| Ag0D | Ag05 | Ag0J | 61.55(6)  | Ag0M | Ag1J | Ag1N | 61.08(7)   |
| Ag0D | Ag05 | Ag0R | 60.26(6)  | Ag0M | Ag1J | Ag1O | 58.96(7)   |
| Ag0D | Ag05 | Ag0S | 106.09(7) | Ag1I | Ag1J | Ag0U | 56.13(6)   |
| Ag0J | Ag05 | Ag07 | 59.54(5)  | Ag1I | Ag1J | Ag1N | 108.37(8)  |
| Ag0J | Ag05 | Ag09 | 85.76(6)  | Ag1I | Ag1J | Ag1O | 57.82(8)   |
| Ag0J | Ag05 | Ag0R | 112.47(7) | Ag1N | Ag1J | Ag0U | 60.37(7)   |
| Ag0J | Ag05 | Ag0S | 56.34(5)  | Ag1O | Ag1J | Ag0U | 102.36(8)  |
| Ag0R | Ag05 | Ag07 | 147.02(7) | Ag1O | Ag1J | Ag1N | 111.97(9)  |
| Ag0R | Ag05 | Ag09 | 151.08(7) | S02V | Ag1J | Ag0M | 89.85(16)  |
| Ag0R | Ag05 | Ag0S | 113.66(7) | S02V | Ag1J | Ag0U | 141.81(16) |

|                |           |                |            |
|----------------|-----------|----------------|------------|
| Ag0V Ag05 Ag07 | 141.19(7) | S02V Ag1J Ag11 | 112.4(2)   |
| Ag0V Ag05 Ag08 | 59.51(6)  | S02V Ag1J Ag1N | 97.5(2)    |
| Ag0V Ag05 Ag09 | 82.76(6)  | S02V Ag1J Ag1O | 54.6(2)    |
| Ag0V Ag05 Ag0D | 114.20(7) | S02V Ag1J S031 | 122.2(4)   |
| Ag0V Ag05 Ag0J | 106.42(7) | S031 Ag1J Ag0M | 107.5(3)   |
| Ag0V Ag05 Ag0R | 70.85(6)  | S031 Ag1J Ag0U | 71.0(3)    |
| Ag0V Ag05 Ag0S | 57.04(5)  | S031 Ag1J Ag11 | 123.2(3)   |
| Ag07 Ag06 Ag0G | 62.34(6)  | S031 Ag1J Ag1N | 52.5(3)    |
| Ag07 Ag06 Ag0J | 63.06(6)  | S031 Ag1J Ag1O | 164.4(3)   |
| Ag07 Ag06 Ag0K | 66.73(6)  | S1 Ag1J Ag0M   | 112.2(3)   |
| Ag07 Ag06 Ag0L | 62.80(5)  | S1 Ag1J Ag0U   | 73.0(3)    |
| Ag07 Ag06 Ag0X | 66.39(6)  | S1 Ag1J Ag11   | 61.4(3)    |
| Ag07 Ag06 Ag16 | 153.90(8) | S1 Ag1J Ag1N   | 124.4(3)   |
| Ag07 Ag06 Ag1A | 115.81(8) | S1 Ag1J Ag1O   | 105.8(3)   |
| Ag07 Ag06 Ag1F | 119.06(8) | S1 Ag1J S02V   | 137.9(4)   |
| Ag07 Ag06 Ag1R | 117.79(8) | S1 Ag1J S031   | 86.0(4)    |
| Ag0G Ag06 Ag0L | 114.81(7) | Ag03 Ag1K Ag1E | 56.75(7)   |
| Ag0G Ag06 Ag0X | 66.50(6)  | Ag15 Ag1K Ag03 | 60.08(7)   |
| Ag0G Ag06 Ag16 | 120.27(7) | Ag15 Ag1K Ag1E | 83.61(10)  |
| Ag0G Ag06 Ag1A | 62.79(6)  | S02D Ag1K Ag03 | 97.31(14)  |
| Ag0G Ag06 Ag1F | 112.06(7) | S02D Ag1K Ag15 | 130.05(14) |
| Ag0G Ag06 Ag1R | 64.84(7)  | S02D Ag1K Ag1E | 122.78(16) |
| Ag0J Ag06 Ag0G | 113.11(7) | S02J Ag1K Ag03 | 102.5(2)   |
| Ag0J Ag06 Ag0L | 67.25(6)  | S02J Ag1K Ag15 | 136.3(2)   |
| Ag0J Ag06 Ag0X | 119.41(7) | S02J Ag1K Ag1E | 55.89(19)  |
| Ag0J Ag06 Ag16 | 125.94(8) | S02J Ag1K S02D | 89.3(2)    |
| Ag0J Ag06 Ag1A | 114.36(7) | S02S Ag1K Ag03 | 114.8(2)   |
| Ag0J Ag06 Ag1F | 67.11(6)  | S02S Ag1K Ag15 | 61.2(2)    |
| Ag0J Ag06 Ag1R | 175.31(9) | S02S Ag1K Ag1E | 137.2(2)   |
| Ag0K Ag06 Ag0G | 62.77(6)  | S02S Ag1K S02D | 99.3(2)    |
| Ag0K Ag06 Ag0J | 62.20(6)  | S02S Ag1K S02J | 140.1(3)   |
| Ag0K Ag06 Ag0L | 119.98(7) | Ag15 Ag1L Ag0P | 79.97(8)   |
| Ag0K Ag06 Ag0X | 122.15(8) | S029 Ag1L Ag0P | 50.32(14)  |
| Ag0K Ag06 Ag16 | 139.12(8) | S029 Ag1L Ag15 | 129.81(16) |
| Ag0K Ag06 Ag1A | 60.25(6)  | S02C Ag1L Ag0P | 97.55(17)  |
| Ag0K Ag06 Ag1F | 60.17(7)  | S02C Ag1L Ag15 | 53.66(17)  |
| Ag0K Ag06 Ag1R | 113.53(8) | S02C Ag1L S029 | 119.0(2)   |
| Ag0L Ag06 Ag1A | 177.40(9) | S02C Ag1L S02G | 142.2(2)   |
| Ag0L Ag06 Ag1F | 123.83(8) | S02G Ag1L Ag0P | 110.09(16) |
| Ag0L Ag06 Ag1R | 117.39(8) | S02G Ag1L Ag15 | 105.4(2)   |

|                          |                           |
|--------------------------|---------------------------|
| Ag0X Ag06 Ag0L 61.22(6)  | S02G Ag1L S029 98.7(2)    |
| Ag0X Ag06 Ag16 90.24(7)  | Ag1I Ag1M Ag0T 75.24(7)   |
| Ag0X Ag06 Ag1A 116.30(8) | S02D Ag1M Ag0T 51.64(15)  |
| Ag0X Ag06 Ag1F 173.47(8) | S02D Ag1M Ag1I 121.86(17) |
| Ag0X Ag06 Ag1R 64.13(7)  | S02D Ag1M S02J 95.0(2)    |
| Ag16 Ag06 Ag0L 96.46(7)  | S02J Ag1M Ag0T 109.20(18) |
| Ag16 Ag06 Ag1A 84.22(7)  | S02J Ag1M Ag1I 126.77(18) |
| Ag16 Ag06 Ag1F 85.12(8)  | S02X Ag1M Ag0T 130.1(2)   |
| Ag16 Ag06 Ag1R 55.58(7)  | S02X Ag1M Ag1I 57.4(2)    |
| Ag1A Ag06 Ag1R 60.97(7)  | S02X Ag1M S02D 146.6(3)   |
| Ag1F Ag06 Ag1A 58.70(7)  | S02X Ag1M S02J 111.3(3)   |
| Ag1F Ag06 Ag1R 109.37(8) | Ag0M Ag1N Ag0U 52.00(6)   |
| Ag01 Ag07 Ag04 57.85(5)  | Ag0M Ag1N Ag1J 57.08(7)   |
| Ag01 Ag07 Ag05 58.10(5)  | Ag1J Ag1N Ag0U 61.33(7)   |
| Ag01 Ag07 Ag06 173.30(7) | Ag1W Ag1N Ag0M 57.74(9)   |
| Ag01 Ag07 Ag09 57.76(5)  | Ag1W Ag1N Ag0U 108.56(10) |
| Ag01 Ag07 Ag0F 72.79(5)  | Ag1W Ag1N Ag1J 91.51(12)  |
| Ag01 Ag07 Ag0G 117.60(7) | S02Y Ag1N Ag0M 101.87(18) |
| Ag01 Ag07 Ag0J 117.14(7) | S02Y Ag1N Ag0U 68.02(16)  |
| Ag01 Ag07 Ag0K 116.26(6) | S02Y Ag1N Ag1J 127.15(18) |
| Ag01 Ag07 Ag0L 122.79(6) | S02Y Ag1N Ag1W 118.80(19) |
| Ag01 Ag07 Ag0X 127.27(7) | S02Y Ag1N S031 98.3(3)    |
| Ag04 Ag07 Ag05 107.86(6) | S031 Ag1N Ag0M 104.3(3)   |
| Ag04 Ag07 Ag09 60.53(5)  | S031 Ag1N Ag0U 71.7(3)    |
| Ag04 Ag07 Ag0K 89.24(6)  | S031 Ag1N Ag1J 52.9(3)    |
| Ag04 Ag07 Ag0L 151.14(7) | S031 Ag1N Ag1W 140.6(3)   |
| Ag04 Ag07 Ag0X 96.71(6)  | S03B Ag1N Ag0M 104.8(4)   |
| Ag05 Ag07 Ag09 59.57(5)  | S03B Ag1N Ag0U 154.6(4)   |
| Ag05 Ag07 Ag0K 91.36(6)  | S03B Ag1N Ag1J 98.7(4)    |
| Ag05 Ag07 Ag0L 92.06(6)  | S03B Ag1N Ag1W 53.1(3)    |
| Ag05 Ag07 Ag0X 149.17(7) | S03B Ag1N S02Y 134.1(4)   |
| Ag06 Ag07 Ag04 120.32(7) | S03B Ag1N S031 110.2(4)   |
| Ag06 Ag07 Ag05 119.27(7) | Ag0M Ag1O Ag0V 54.24(6)   |
| Ag06 Ag07 Ag09 115.54(6) | Ag0M Ag1O Ag1G 60.88(7)   |
| Ag06 Ag07 Ag0F 113.90(7) | Ag0M Ag1O Ag1J 59.72(7)   |
| Ag06 Ag07 Ag0G 60.57(6)  | Ag0V Ag1O Ag1G 60.93(6)   |
| Ag06 Ag07 Ag0J 59.73(6)  | Ag11 Ag1O Ag0M 57.21(7)   |
| Ag06 Ag07 Ag0K 57.07(5)  | Ag11 Ag1O Ag0V 58.52(6)   |
| Ag06 Ag07 Ag0L 62.31(6)  | Ag11 Ag1O Ag1G 110.17(9)  |
| Ag06 Ag07 Ag0X 58.51(6)  | Ag11 Ag1O Ag1J 60.93(8)   |

|      |      |      |           |      |      |      |            |
|------|------|------|-----------|------|------|------|------------|
| Ag09 | Ag07 | Ag0K | 58.53(5)  | Ag1J | Ag1O | Ag0V | 106.39(9)  |
| Ag09 | Ag07 | Ag0X | 151.26(7) | Ag1J | Ag1O | Ag1G | 110.00(11) |
| Ag0F | Ag07 | Ag04 | 95.32(6)  | S02V | Ag1O | Ag0M | 88.28(19)  |
| Ag0F | Ag07 | Ag05 | 94.71(6)  | S02V | Ag1O | Ag0V | 141.3(2)   |
| Ag0F | Ag07 | Ag09 | 130.54(7) | S02V | Ag1O | Ag11 | 112.13(19) |
| Ag0F | Ag07 | Ag0G | 116.79(7) | S02V | Ag1O | Ag1G | 94.57(18)  |
| Ag0F | Ag07 | Ag0J | 119.84(7) | S02V | Ag1O | Ag1J | 51.23(17)  |
| Ag0F | Ag07 | Ag0K | 170.90(7) | S02V | Ag1O | S036 | 122.0(4)   |
| Ag0F | Ag07 | Ag0L | 61.59(6)  | S02W | Ag1O | Ag0M | 108.08(18) |
| Ag0F | Ag07 | Ag0X | 64.05(5)  | S02W | Ag1O | Ag0V | 70.93(17)  |
| Ag0G | Ag07 | Ag04 | 59.86(5)  | S02W | Ag1O | Ag11 | 125.6(2)   |
| Ag0G | Ag07 | Ag05 | 146.18(7) | S02W | Ag1O | Ag1G | 52.87(19)  |
| Ag0G | Ag07 | Ag09 | 89.03(6)  | S02W | Ag1O | Ag1J | 162.2(2)   |
| Ag0G | Ag07 | Ag0J | 109.06(6) | S02W | Ag1O | S02V | 119.8(3)   |
| Ag0G | Ag07 | Ag0K | 59.11(5)  | S02W | Ag1O | S036 | 93.8(4)    |
| Ag0G | Ag07 | Ag0L | 112.97(7) | S036 | Ag1O | Ag0M | 126.8(3)   |
| Ag0G | Ag07 | Ag0X | 63.16(5)  | S036 | Ag1O | Ag0V | 91.7(3)    |
| Ag0J | Ag07 | Ag04 | 142.32(7) | S036 | Ag1O | Ag11 | 70.4(3)    |
| Ag0J | Ag07 | Ag05 | 59.55(5)  | S036 | Ag1O | Ag1G | 141.0(3)   |
| Ag0J | Ag07 | Ag09 | 84.78(6)  | S036 | Ag1O | Ag1J | 103.9(3)   |
| Ag0J | Ag07 | Ag0K | 58.11(5)  | Ag0A | Ag1P | Ag0U | 51.21(6)   |
| Ag0J | Ag07 | Ag0L | 65.95(6)  | Ag0A | Ag1P | Ag1V | 58.33(8)   |
| Ag0J | Ag07 | Ag0X | 110.07(7) | Ag1I | Ag1P | Ag0A | 58.56(7)   |
| Ag0K | Ag07 | Ag0X | 107.65(6) | Ag1I | Ag1P | Ag0U | 109.18(10) |
| Ag0L | Ag07 | Ag09 | 147.50(7) | Ag1I | Ag1P | Ag1V | 88.59(9)   |
| Ag0L | Ag07 | Ag0K | 111.48(7) | Ag1V | Ag1P | Ag0U | 63.43(9)   |
| Ag0L | Ag07 | Ag0X | 58.73(5)  | S02Y | Ag1P | Ag0A | 100.11(17) |
| Ag01 | Ag08 | Ag05 | 58.34(5)  | S02Y | Ag1P | Ag0U | 66.10(18)  |
| Ag01 | Ag08 | Ag09 | 59.54(5)  | S02Y | Ag1P | Ag1I | 122.77(19) |
| Ag01 | Ag08 | Ag0E | 58.74(5)  | S02Y | Ag1P | Ag1V | 127.1(2)   |
| Ag01 | Ag08 | Ag0U | 117.86(7) | S02Y | Ag1P | S031 | 96.0(3)    |
| Ag01 | Ag08 | Ag0V | 117.93(7) | S031 | Ag1P | Ag0A | 101.3(3)   |
| Ag01 | Ag08 | Ag10 | 120.15(7) | S031 | Ag1P | Ag0U | 68.7(3)    |
| Ag01 | Ag08 | Ag11 | 117.56(6) | S031 | Ag1P | Ag1I | 137.5(3)   |
| Ag01 | Ag08 | Ag17 | 119.03(8) | S031 | Ag1P | Ag1V | 51.3(3)    |
| Ag05 | Ag08 | Ag0E | 109.54(6) | S032 | Ag1P | Ag0A | 107.2(2)   |
| Ag05 | Ag08 | Ag11 | 91.78(6)  | S032 | Ag1P | Ag0U | 152.1(3)   |
| Ag09 | Ag08 | Ag05 | 61.92(5)  | S032 | Ag1P | Ag1I | 56.6(2)    |
| Ag09 | Ag08 | Ag0E | 61.17(6)  | S032 | Ag1P | Ag1V | 90.8(3)    |
| Ag09 | Ag08 | Ag0U | 84.87(6)  | S032 | Ag1P | S02Y | 141.4(3)   |

|                |           |                |            |
|----------------|-----------|----------------|------------|
| Ag09 Ag08 Ag0V | 85.08(7)  | S032 Ag1P S031 | 104.5(4)   |
| Ag09 Ag08 Ag10 | 147.14(9) | S02N Ag1Q Ag1I | 85.09(14)  |
| Ag09 Ag08 Ag11 | 58.02(5)  | S02N Ag1Q S02X | 102.7(3)   |
| Ag09 Ag08 Ag17 | 149.16(8) | S02N Ag1Q S032 | 94.0(3)    |
| Ag0E Ag08 Ag11 | 90.92(6)  | S02X Ag1Q Ag1I | 54.00(17)  |
| Ag0M Ag08 Ag01 | 172.61(7) | S02X Ag1Q S032 | 103.0(3)   |
| Ag0M Ag08 Ag05 | 119.36(8) | S032 Ag1Q Ag1I | 53.56(18)  |
| Ag0M Ag08 Ag09 | 113.07(7) | P038 Ag1Q Ag1I | 156.7(3)   |
| Ag0M Ag08 Ag0E | 118.79(7) | P038 Ag1Q S02N | 118.2(3)   |
| Ag0M Ag08 Ag0U | 59.17(6)  | P038 Ag1Q S02X | 116.3(3)   |
| Ag0M Ag08 Ag0V | 59.17(6)  | P038 Ag1Q S032 | 119.2(3)   |
| Ag0M Ag08 Ag10 | 65.76(6)  | Ag06 Ag1R Ag0G | 52.23(6)   |
| Ag0M Ag08 Ag11 | 55.05(5)  | Ag06 Ag1R Ag0X | 52.61(6)   |
| Ag0M Ag08 Ag17 | 67.05(7)  | Ag0X Ag1R Ag0G | 57.56(6)   |
| Ag0U Ag08 Ag05 | 143.95(7) | Ag16 Ag1R Ag06 | 57.39(7)   |
| Ag0U Ag08 Ag0E | 59.62(6)  | Ag16 Ag1R Ag0G | 109.49(11) |
| Ag0U Ag08 Ag11 | 56.60(6)  | Ag16 Ag1R Ag0X | 84.19(8)   |
| Ag0V Ag08 Ag05 | 60.20(6)  | Ag16 Ag1R Ag1A | 82.99(11)  |
| Ag0V Ag08 Ag0E | 143.19(7) | Ag16 Ag1R S029 | 126.37(15) |
| Ag0V Ag08 Ag0U | 106.15(7) | Ag1A Ag1R Ag06 | 57.14(7)   |
| Ag0V Ag08 Ag11 | 56.59(6)  | Ag1A Ag1R Ag0G | 57.12(7)   |
| Ag10 Ag08 Ag05 | 89.28(7)  | Ag1A Ag1R Ag0X | 103.06(10) |
| Ag10 Ag08 Ag0E | 150.47(9) | S029 Ag1R Ag06 | 96.73(13)  |
| Ag10 Ag08 Ag0U | 116.74(7) | S029 Ag1R Ag0G | 67.94(14)  |
| Ag10 Ag08 Ag0V | 65.87(7)  | S029 Ag1R Ag0X | 47.75(12)  |
| Ag10 Ag08 Ag11 | 111.64(7) | S029 Ag1R Ag1A | 124.26(16) |
| Ag17 Ag08 Ag05 | 147.12(7) | S02G Ag1R Ag06 | 109.18(19) |
| Ag17 Ag08 Ag0E | 90.96(7)  | S02G Ag1R Ag0G | 67.98(17)  |
| Ag17 Ag08 Ag0U | 68.61(7)  | S02G Ag1R Ag0X | 120.54(19) |
| Ag17 Ag08 Ag0V | 116.53(7) | S02G Ag1R Ag16 | 138.5(2)   |
| Ag17 Ag08 Ag10 | 63.02(7)  | S02G Ag1R Ag1A | 60.38(17)  |
| Ag17 Ag08 Ag11 | 113.98(7) | S02G Ag1R S029 | 92.2(2)    |
| Ag01 Ag09 Ag04 | 56.44(5)  | S02G Ag1R S02L | 139.7(2)   |
| Ag01 Ag09 Ag05 | 57.37(5)  | S02L Ag1R Ag06 | 108.74(19) |
| Ag01 Ag09 Ag07 | 56.05(5)  | S02L Ag1R Ag0G | 150.69(18) |
| Ag01 Ag09 Ag08 | 58.60(5)  | S02L Ag1R Ag0X | 93.40(18)  |
| Ag01 Ag09 Ag0E | 58.16(5)  | S02L Ag1R Ag16 | 58.89(19)  |
| Ag01 Ag09 Ag0K | 116.97(7) | S02L Ag1R Ag1A | 136.7(2)   |
| Ag01 Ag09 Ag0O | 118.00(7) | S02L Ag1R S029 | 96.4(2)    |
| Ag01 Ag09 Ag0S | 123.07(7) | S02V Ag1S Ag1W | 88.67(16)  |

|                |           |                |            |
|----------------|-----------|----------------|------------|
| Ag01 Ag09 Ag0W | 124.76(8) | S02V Ag1S S035 | 96.6(3)    |
| Ag01 Ag09 Ag11 | 127.14(7) | S02V Ag1S S03B | 96.5(4)    |
| Ag04 Ag09 Ag07 | 58.14(5)  | S035 Ag1S Ag1W | 51.6(3)    |
| Ag04 Ag09 Ag11 | 150.79(8) | S035 Ag1S S03B | 99.9(4)    |
| Ag05 Ag09 Ag04 | 105.53(6) | S03B Ag1S Ag1W | 50.2(3)    |
| Ag05 Ag09 Ag07 | 59.04(5)  | P03G Ag1S Ag1W | 140.4(6)   |
| Ag05 Ag09 Ag0O | 146.50(8) | P03G Ag1S S02V | 129.3(6)   |
| Ag05 Ag09 Ag0W | 153.20(7) | P03G Ag1S S035 | 121.9(6)   |
| Ag05 Ag09 Ag11 | 96.79(6)  | P03G Ag1S S03B | 106.7(6)   |
| Ag08 Ag09 Ag04 | 106.75(6) | Ag02 Ag1T Ag0S | 53.98(7)   |
| Ag08 Ag09 Ag05 | 59.91(5)  | Ag02 Ag1T Ag14 | 57.21(7)   |
| Ag08 Ag09 Ag07 | 106.53(6) | Ag02 Ag1T Ag2  | 100.79(14) |
| Ag08 Ag09 Ag0E | 60.30(6)  | Ag0S Ag1T Ag14 | 57.66(9)   |
| Ag08 Ag09 Ag0K | 150.67(8) | Ag0S Ag1T Ag2  | 53.32(11)  |
| Ag08 Ag09 Ag0O | 150.82(8) | Ag14 Ag1T Ag2  | 60.70(12)  |
| Ag08 Ag09 Ag0S | 96.32(7)  | S02E Ag1T Ag02 | 88.04(17)  |
| Ag08 Ag09 Ag0W | 97.05(7)  | S02E Ag1T Ag0S | 111.2(2)   |
| Ag08 Ag09 Ag11 | 68.54(6)  | S02E Ag1T Ag14 | 53.59(17)  |
| Ag0B Ag09 Ag01 | 174.23(8) | S02E Ag1T Ag2  | 91.5(2)    |
| Ag0B Ag09 Ag04 | 119.35(6) | S02E Ag1T S02W | 122.3(3)   |
| Ag0B Ag09 Ag05 | 123.38(8) | S02E Ag1T S036 | 127.9(4)   |
| Ag0B Ag09 Ag07 | 118.78(7) | S02W Ag1T Ag02 | 97.95(17)  |
| Ag0B Ag09 Ag08 | 127.10(7) | S02W Ag1T Ag0S | 118.4(2)   |
| Ag0B Ag09 Ag0E | 124.24(7) | S02W Ag1T Ag14 | 153.20(18) |
| Ag0B Ag09 Ag0K | 57.82(6)  | S02W Ag1T Ag2  | 141.8(2)   |
| Ag0B Ag09 Ag0O | 57.78(5)  | S036 Ag1T Ag02 | 125.0(3)   |
| Ag0B Ag09 Ag0S | 57.67(5)  | S036 Ag1T Ag0S | 73.1(3)    |
| Ag0B Ag09 Ag0W | 57.66(6)  | S036 Ag1T Ag14 | 107.9(4)   |
| Ag0B Ag09 Ag11 | 58.57(6)  | S036 Ag1T Ag2  | 47.8(4)    |
| Ag0E Ag09 Ag04 | 59.17(5)  | S036 Ag1T S02W | 94.4(4)    |
| Ag0E Ag09 Ag05 | 107.30(6) | Ag0B Ag1U Ag0K | 54.64(6)   |
| Ag0E Ag09 Ag07 | 105.70(6) | Ag0B Ag1U Ag2  | 66.15(12)  |
| Ag0E Ag09 Ag0K | 145.91(7) | Ag1 Ag1U Ag0B  | 57.78(10)  |
| Ag0E Ag09 Ag0O | 92.51(7)  | Ag1 Ag1U Ag0K  | 101.21(11) |
| Ag0E Ag09 Ag0S | 153.23(8) | Ag1 Ag1U Ag2   | 99.00(19)  |
| Ag0E Ag09 Ag0W | 66.67(6)  | Ag2 Ag1U Ag0K  | 87.28(10)  |
| Ag0E Ag09 Ag11 | 96.55(7)  | S02I Ag1U Ag0B | 101.90(18) |
| Ag0K Ag09 Ag04 | 89.28(6)  | S02I Ag1U Ag0K | 83.48(16)  |
| Ag0K Ag09 Ag05 | 92.53(7)  | S02I Ag1U Ag1  | 75.1(2)    |
| Ag0K Ag09 Ag07 | 60.96(5)  | S02I Ag1U Ag2  | 167.8(2)   |

|                |            |                |            |
|----------------|------------|----------------|------------|
| Ag0K Ag09 Ag0O | 58.51(6)   | S02I Ag1U S02U | 140.1(3)   |
| Ag0K Ag09 Ag0W | 106.46(6)  | S02I Ag1U S36  | 112.1(4)   |
| Ag0K Ag09 Ag11 | 108.58(7)  | S02I Ag1U Ag2A | 143.6(4)   |
| Ag0O Ag09 Ag04 | 61.61(5)   | S02U Ag1U Ag0B | 101.0(2)   |
| Ag0O Ag09 Ag07 | 90.08(6)   | S02U Ag1U Ag0K | 83.68(18)  |
| Ag0O Ag09 Ag11 | 107.72(6)  | S02U Ag1U Ag1  | 144.6(3)   |
| Ag0S Ag09 Ag04 | 146.78(8)  | S02U Ag1U Ag2  | 45.9(2)    |
| Ag0S Ag09 Ag05 | 65.80(5)   | S02U Ag1U S36  | 102.9(4)   |
| Ag0S Ag09 Ag07 | 92.85(7)   | S02U Ag1U Ag2A | 76.3(4)    |
| Ag0S Ag09 Ag0K | 60.42(6)   | S36 Ag1U Ag0B  | 82.6(4)    |
| Ag0S Ag09 Ag0O | 106.87(6)  | S36 Ag1U Ag0K  | 137.0(4)   |
| Ag0S Ag09 Ag0W | 107.10(7)  | S36 Ag1U Ag1   | 50.5(3)    |
| Ag0S Ag09 Ag11 | 60.41(6)   | S36 Ag1U Ag2   | 70.0(3)    |
| Ag0W Ag09 Ag04 | 93.69(7)   | Ag2A Ag1U Ag0B | 64.0(3)    |
| Ag0W Ag09 Ag07 | 147.21(7)  | Ag2A Ag1U Ag0K | 109.2(2)   |
| Ag0W Ag09 Ag0O | 59.66(6)   | Ag2A Ag1U Ag1  | 69.0(3)    |
| Ag0W Ag09 Ag11 | 59.64(6)   | Ag2A Ag1U S36  | 36.6(3)    |
| Ag11 Ag09 Ag07 | 150.90(8)  | Ag0A Ag1V Ag0W | 51.51(7)   |
| Ag0E Ag0A Ag0N | 63.30(5)   | Ag0A Ag1V Ag12 | 56.58(7)   |
| Ag0E Ag0A Ag0T | 61.01(6)   | Ag0A Ag1V Ag1P | 59.49(7)   |
| Ag0E Ag0A Ag0U | 62.49(6)   | Ag12 Ag1V Ag0W | 53.78(7)   |
| Ag0E Ag0A Ag12 | 120.87(8)  | Ag12 Ag1V Ag1P | 109.41(10) |
| Ag0E Ag0A Ag13 | 59.09(6)   | Ag1P Ag1V Ag0W | 103.27(9)  |
| Ag0E Ag0A Ag1I | 134.51(8)  | S02N Ag1V Ag0A | 87.52(17)  |
| Ag0E Ag0A Ag1P | 116.12(7)  | S02N Ag1V Ag0W | 105.90(19) |
| Ag0E Ag0A Ag1V | 128.73(10) | S02N Ag1V Ag12 | 52.12(17)  |
| Ag0N Ag0A Ag0T | 62.23(6)   | S02N Ag1V Ag1P | 100.2(2)   |
| Ag0N Ag0A Ag12 | 65.00(6)   | S02N Ag1V S031 | 133.5(4)   |
| Ag0N Ag0A Ag13 | 110.75(6)  | S031 Ag1V Ag0A | 105.1(3)   |
| Ag0N Ag0A Ag1I | 118.72(8)  | S031 Ag1V Ag0W | 117.0(3)   |
| Ag0N Ag0A Ag1P | 176.07(9)  | S031 Ag1V Ag12 | 161.7(3)   |
| Ag0N Ag0A Ag1V | 121.43(10) | S031 Ag1V Ag1P | 54.6(3)    |
| Ag0T Ag0A Ag12 | 114.75(7)  | S1 Ag1V Ag0A   | 104.9(3)   |
| Ag0T Ag0A Ag13 | 58.21(6)   | S1 Ag1V Ag0W   | 56.9(3)    |
| Ag0T Ag0A Ag1I | 79.63(7)   | S1 Ag1V Ag12   | 97.1(3)    |
| Ag0T Ag0A Ag1P | 113.93(8)  | S1 Ag1V Ag1P   | 125.6(3)   |
| Ag0T Ag0A Ag1V | 170.17(11) | S1 Ag1V S02N   | 132.8(4)   |
| Ag0U Ag0A Ag0N | 113.19(8)  | S1 Ag1V S031   | 87.7(4)    |
| Ag0U Ag0A Ag0T | 116.24(7)  | Ag0M Ag1W Ag1N | 62.61(8)   |
| Ag0U Ag0A Ag12 | 117.99(8)  | Ag0M Ag1W Ag1S | 105.63(15) |

|                |            |                |            |
|----------------|------------|----------------|------------|
| Ag0U Ag0A Ag13 | 69.03(7)   | Ag1G Ag1W Ag0M | 63.52(9)   |
| Ag0U Ag0A Ag1I | 126.64(8)  | Ag1G Ag1W Ag1N | 124.50(14) |
| Ag0U Ag0A Ag1P | 68.90(7)   | Ag1G Ag1W Ag1S | 91.37(14)  |
| Ag0U Ag0A Ag1V | 71.63(7)   | Ag1N Ag1W Ag1S | 90.72(11)  |
| Ag0W Ag0A Ag0E | 71.37(6)   | S02R Ag1W Ag0M | 79.79(16)  |
| Ag0W Ag0A Ag0N | 63.77(6)   | S02R Ag1W Ag1G | 90.7(2)    |
| Ag0W Ag0A Ag0T | 119.20(7)  | S02R Ag1W Ag1N | 92.30(19)  |
| Ag0W Ag0A Ag0U | 64.22(7)   | S02R Ag1W Ag1S | 174.6(2)   |
| Ag0W Ag0A Ag12 | 61.38(7)   | S035 Ag1W Ag0M | 107.0(3)   |
| Ag0W Ag0A Ag13 | 123.11(7)  | S035 Ag1W Ag1G | 51.2(3)    |
| Ag0W Ag0A Ag1I | 153.71(8)  | S035 Ag1W Ag1N | 140.2(3)   |
| Ag0W Ag0A Ag1P | 120.00(8)  | S035 Ag1W Ag1S | 53.4(3)    |
| Ag0W Ag0A Ag1V | 68.93(9)   | S035 Ag1W S02R | 125.0(3)   |
| Ag12 Ag0A Ag13 | 172.58(9)  | S03B Ag1W Ag0M | 106.4(4)   |
| Ag12 Ag0A Ag1I | 94.90(7)   | S03B Ag1W Ag1G | 142.9(4)   |
| Ag12 Ag0A Ag1P | 117.33(7)  | S03B Ag1W Ag1N | 49.8(3)    |
| Ag12 Ag0A Ag1V | 63.02(7)   | S03B Ag1W Ag1S | 55.5(3)    |
| Ag1I Ag0A Ag13 | 81.78(7)   | S03B Ag1W S02R | 123.9(4)   |
| Ag1I Ag0A Ag1P | 58.58(8)   | S03B Ag1W S035 | 106.7(4)   |
| Ag1I Ag0A Ag1V | 90.91(10)  | Ag0B Ag1 Ag1U  | 62.40(9)   |
| Ag1P Ag0A Ag13 | 66.56(6)   | Ag0B Ag1 Ag2A  | 59.34(17)  |
| Ag1V Ag0A Ag13 | 123.44(8)  | Ag1U Ag1 Ag2A  | 50.3(4)    |
| Ag1V Ag0A Ag1P | 62.19(9)   | S02Q Ag1 Ag0B  | 106.20(18) |
| Ag09 Ag0B Ag0K | 65.01(6)   | S02Q Ag1 Ag1U  | 143.8(3)   |
| Ag09 Ag0B Ag0O | 65.26(5)   | S02Q Ag1 Ag2A  | 156.0(4)   |
| Ag09 Ag0B Ag0S | 65.00(6)   | S02Q Ag1 Ag2B  | 119.5(4)   |
| Ag09 Ag0B Ag0W | 65.26(6)   | S36 Ag1 Ag0B   | 91.7(4)    |
| Ag09 Ag0B Ag11 | 65.55(6)   | S36 Ag1 Ag1U   | 61.4(4)    |
| Ag09 Ag0B Ag1U | 130.56(10) | S36 Ag1 S02Q   | 154.0(5)   |
| Ag09 Ag0B Ag1  | 143.12(12) | S36 Ag1 Ag2A   | 32.4(4)    |
| Ag09 Ag0B Ag2  | 120.96(10) | S36 Ag1 Ag2B   | 51.3(5)    |
| Ag09 Ag0B Ag2A | 152.0(2)   | Ag2B Ag1 Ag0B  | 65.3(2)    |
| Ag09 Ag0B Ag2B | 146.6(2)   | Ag2B Ag1 Ag1U  | 88.2(4)    |
| Ag0K Ag0B Ag0O | 63.20(6)   | Ag0B Ag2 Ag1T  | 106.06(14) |
| Ag0K Ag0B Ag11 | 120.44(7)  | Ag0S Ag2 Ag0B  | 53.47(9)   |
| Ag0K Ag0B Ag1U | 65.55(9)   | Ag0S Ag2 Ag14  | 58.40(9)   |
| Ag0K Ag0B Ag1  | 111.43(14) | Ag0S Ag2 Ag1T  | 59.78(11)  |
| Ag0K Ag0B Ag2  | 88.43(10)  | Ag0S Ag2 Ag1U  | 91.56(13)  |
| Ag0K Ag0B Ag2A | 107.7(4)   | Ag14 Ag2 Ag0B  | 104.78(12) |
| Ag0K Ag0B Ag2B | 145.5(3)   | Ag14 Ag2 Ag1T  | 57.34(10)  |



|                |            |                |            |
|----------------|------------|----------------|------------|
| Ag0O Ag0B Ag11 | 119.58(8)  | Ag1U Ag2 Ag0B  | 55.98(10)  |
| Ag0O Ag0B Ag1U | 91.96(8)   | Ag1U Ag2 Ag14  | 100.78(15) |
| Ag0O Ag0B Ag1  | 80.25(12)  | Ag1U Ag2 Ag1T  | 149.72(16) |
| Ag0O Ag0B Ag2  | 146.17(11) | S02U Ag2 Ag0B  | 99.3(2)    |
| Ag0O Ag0B Ag2A | 138.0(3)   | S02U Ag2 Ag0S  | 93.8(2)    |
| Ag0O Ag0B Ag2B | 131.5(3)   | S02U Ag2 Ag14  | 57.1(2)    |
| Ag0S Ag0B Ag0K | 65.27(6)   | S02U Ag2 Ag1T  | 113.5(3)   |
| Ag0S Ag0B Ag0O | 119.04(7)  | S02U Ag2 Ag1U  | 54.6(2)    |
| Ag0S Ag0B Ag0W | 119.47(7)  | S02U Ag2 S036  | 164.8(5)   |
| Ag0S Ag0B Ag11 | 65.11(6)   | S036 Ag2 Ag0B  | 87.2(4)    |
| Ag0S Ag0B Ag1U | 94.71(9)   | S036 Ag2 Ag0S  | 79.1(3)    |
| Ag0S Ag0B Ag1  | 149.95(11) | S036 Ag2 Ag14  | 108.1(4)   |
| Ag0S Ag0B Ag2  | 55.98(9)   | S036 Ag2 Ag1T  | 51.3(4)    |
| Ag0S Ag0B Ag2A | 87.2(2)    | S036 Ag2 Ag1U  | 138.2(4)   |
| Ag0S Ag0B Ag2B | 109.4(3)   | Ag0D S01Z Ag0C | 111.98(19) |
| Ag0W Ag0B Ag0K | 118.52(7)  | Ag0D S01Z Ag0L | 72.24(15)  |
| Ag0W Ag0B Ag0O | 64.60(6)   | Ag0F S01Z Ag0C | 73.96(16)  |
| Ag0W Ag0B Ag11 | 64.34(7)   | Ag0F S01Z Ag0D | 129.6(2)   |
| Ag0W Ag0B Ag1U | 144.61(9)  | Ag0F S01Z Ag0L | 71.20(14)  |
| Ag0W Ag0B Ag1  | 89.00(9)   | Ag0L S01Z Ag0C | 135.0(2)   |
| Ag0W Ag0B Ag2  | 149.18(11) | C32 S01Z Ag0C  | 97.5(6)    |
| Ag0W Ag0B Ag2A | 132.9(4)   | C32 S01Z Ag0D  | 118.9(7)   |
| Ag0W Ag0B Ag2B | 94.3(3)    | C32 S01Z Ag0F  | 109.1(7)   |
| Ag11 Ag0B Ag1U | 147.69(10) | C32 S01Z Ag0L  | 120.2(6)   |
| Ag11 Ag0B Ag2  | 89.90(10)  | Ag0F S020 Ag0Q | 88.74(19)  |
| Ag11 Ag0B Ag2A | 100.6(4)   | C3AA S020 Ag0F | 101.0(5)   |
| Ag11 Ag0B Ag2B | 82.00(18)  | C3AA S020 Ag0Q | 102.8(5)   |
| Ag1U Ag0B Ag2  | 57.87(10)  | Ag0I S021 Ag0H | 141.8(2)   |
| Ag1U Ag0B Ag2B | 81.6(2)    | Ag0Q S021 Ag0H | 77.62(16)  |
| Ag1 Ag0B Ag11  | 128.02(14) | Ag0Q S021 Ag0I | 73.15(15)  |
| Ag1 Ag0B Ag1U  | 59.82(11)  | Ag0Q S021 Ag0T | 131.9(2)   |
| Ag1 Ag0B Ag2   | 94.85(12)  | Ag0T S021 Ag0H | 118.0(2)   |
| Ag1 Ag0B Ag2A  | 64.8(2)    | Ag0T S021 Ag0I | 68.66(13)  |
| Ag1 Ag0B Ag2B  | 55.0(3)    | C12 S021 Ag0H  | 95.8(5)    |
| Ag2A Ag0B Ag1U | 51.1(4)    | C12 S021 Ag0I  | 116.6(5)   |
| Ag01 Ag0C Ag0F | 67.44(5)   | C12 S021 Ag0Q  | 108.9(6)   |
| Ag01 Ag0C Ag0H | 59.54(5)   | C12 S021 Ag0T  | 113.7(6)   |
| Ag0H Ag0C Ag0F | 94.95(6)   | Ag0I S022 Ag0P | 75.05(16)  |
| S01Z Ag0C Ag01 | 94.47(12)  | Ag0I S022 Ag0Y | 126.7(2)   |
| S01Z Ag0C Ag0F | 48.36(12)  | Ag0P S022 Ag0Y | 120.3(2)   |

|      |      |      |            |      |      |      |           |
|------|------|------|------------|------|------|------|-----------|
| S01Z | Ag0C | Ag0H | 142.77(13) | C22  | S022 | Ag0I | 115.0(6)  |
| S023 | Ag0C | Ag01 | 93.30(13)  | C22  | S022 | Ag0P | 117.4(5)  |
| S023 | Ag0C | Ag0F | 71.61(13)  | C22  | S022 | Ag0Y | 102.1(5)  |
| S023 | Ag0C | Ag0H | 52.49(14)  | Ag0H | S023 | Ag0C | 73.73(16) |
| S023 | Ag0C | S01Z | 109.19(18) | C37  | S023 | Ag0C | 109.4(6)  |
| S024 | Ag0C | Ag01 | 100.49(13) | C37  | S023 | Ag0H | 110.0(6)  |
| S024 | Ag0C | Ag0F | 145.67(16) | Ag0C | S024 | Ag0R | 110.2(2)  |
| S024 | Ag0C | Ag0H | 106.42(16) | Ag0C | S024 | Ag10 | 133.7(2)  |
| S024 | Ag0C | S01Z | 104.2(2)   | Ag0R | S024 | Ag10 | 78.71(18) |
| S024 | Ag0C | S023 | 142.6(2)   | C9   | S024 | Ag0C | 105.9(6)  |
| Ag02 | Ag0D | Ag0J | 57.12(5)   | C9   | S024 | Ag0R | 105.1(6)  |
| Ag02 | Ag0D | Ag0L | 120.12(6)  | C9   | S024 | Ag10 | 115.6(6)  |
| Ag02 | Ag0D | Ag1D | 62.63(6)   | Ag0R | S025 | Ag0D | 69.30(16) |
| Ag05 | Ag0D | Ag02 | 57.12(5)   | Ag0R | S025 | Ag1B | 104.1(2)  |
| Ag05 | Ag0D | Ag0J | 59.28(5)   | Ag1B | S025 | Ag0D | 96.25(18) |
| Ag05 | Ag0D | Ag0L | 89.70(6)   | C5BA | S025 | Ag0D | 126.4(5)  |
| Ag05 | Ag0D | Ag0R | 60.14(6)   | C5BA | S025 | Ag0R | 119.7(6)  |
| Ag05 | Ag0D | Ag1D | 112.12(7)  | C5BA | S025 | Ag1B | 126.2(6)  |
| Ag0J | Ag0D | Ag0L | 63.16(5)   | Ag0H | S027 | Ag13 | 116.4(2)  |
| Ag0J | Ag0D | Ag1D | 63.68(6)   | Ag0H | S027 | Ag17 | 130.4(3)  |
| Ag0R | Ag0D | Ag02 | 63.24(6)   | Ag13 | S027 | Ag17 | 81.34(18) |
| Ag0R | Ag0D | Ag0J | 110.47(7)  | C15  | S027 | Ag0H | 105.1(5)  |
| Ag0R | Ag0D | Ag0L | 142.92(8)  | C15  | S027 | Ag13 | 108.1(6)  |
| Ag0R | Ag0D | Ag1D | 115.05(8)  | C15  | S027 | Ag17 | 112.6(4)  |
| Ag1D | Ag0D | Ag0L | 95.26(7)   | Ag0D | S028 | Ag0L | 73.79(18) |
| S01Z | Ag0D | Ag02 | 137.59(14) | Ag1C | S028 | Ag0D | 136.0(3)  |
| S01Z | Ag0D | Ag05 | 80.52(13)  | Ag1C | S028 | Ag0L | 86.55(19) |
| S01Z | Ag0D | Ag0J | 104.84(13) | Ag1D | S028 | Ag0D | 72.93(17) |
| S01Z | Ag0D | Ag0L | 55.62(12)  | Ag1D | S028 | Ag0L | 125.7(3)  |
| S01Z | Ag0D | Ag0R | 95.69(13)  | Ag1D | S028 | Ag1C | 88.81(19) |
| S01Z | Ag0D | Ag1D | 149.19(14) | C4DA | S028 | Ag0D | 105.0(9)  |
| S01Z | Ag0D | S025 | 117.93(18) | C4DA | S028 | Ag0L | 106.5(7)  |
| S01Z | Ag0D | S028 | 97.86(19)  | C4DA | S028 | Ag1C | 118.3(9)  |
| S025 | Ag0D | Ag02 | 80.32(13)  | C4DA | S028 | Ag1D | 122.8(8)  |
| S025 | Ag0D | Ag05 | 111.98(15) | Ag0P | S029 | Ag1L | 77.07(18) |
| S025 | Ag0D | Ag0J | 134.66(14) | Ag0P | S029 | Ag1R | 118.4(2)  |
| S025 | Ag0D | Ag0L | 156.81(15) | Ag0X | S029 | Ag0P | 90.2(2)   |
| S025 | Ag0D | Ag0R | 53.60(15)  | Ag0X | S029 | Ag1L | 133.9(3)  |
| S025 | Ag0D | Ag1D | 84.41(15)  | Ag0X | S029 | Ag1R | 72.53(17) |
| S028 | Ag0D | Ag02 | 110.73(15) | Ag1L | S029 | Ag1R | 75.31(16) |

|      |      |      |            |      |      |      |           |
|------|------|------|------------|------|------|------|-----------|
| S028 | Ag0D | Ag05 | 130.91(14) | C75  | S029 | Ag0P | 106.1(7)  |
| S028 | Ag0D | Ag0J | 74.32(14)  | C75  | S029 | Ag0X | 103.7(8)  |
| S028 | Ag0D | Ag0L | 53.17(15)  | C75  | S029 | Ag1L | 122.4(8)  |
| S028 | Ag0D | Ag0R | 163.89(16) | C75  | S029 | Ag1R | 135.2(7)  |
| S028 | Ag0D | Ag1D | 52.22(15)  | Ag0L | S02A | Ag0X | 69.75(16) |
| S028 | Ag0D | S025 | 111.7(2)   | Ag0L | S02A | Ag19 | 134.6(3)  |
| Ag01 | Ag0E | Ag04 | 57.31(5)   | Ag19 | S02A | Ag0X | 115.9(2)  |
| Ag01 | Ag0E | Ag08 | 58.05(5)   | C129 | S02A | Ag0L | 113.8(5)  |
| Ag01 | Ag0E | Ag09 | 58.37(5)   | C129 | S02A | Ag0X | 117.7(6)  |
| Ag01 | Ag0E | Ag0N | 116.65(7)  | C129 | S02A | Ag19 | 102.8(5)  |
| Ag01 | Ag0E | Ag0T | 125.63(7)  | Ag0R | S02B | Ag10 | 73.51(16) |
| Ag01 | Ag0E | Ag0U | 117.72(7)  | Ag18 | S02B | Ag0R | 84.8(2)   |
| Ag01 | Ag0E | Ag0W | 115.48(7)  | Ag18 | S02B | Ag10 | 133.0(2)  |
| Ag01 | Ag0E | Ag13 | 123.26(7)  | Ag18 | S02B | Ag1G | 86.39(19) |
| Ag04 | Ag0E | Ag09 | 61.48(6)   | Ag1G | S02B | Ag0R | 129.7(2)  |
| Ag04 | Ag0E | Ag0N | 59.78(5)   | Ag1G | S02B | Ag10 | 77.26(19) |
| Ag04 | Ag0E | Ag0W | 89.51(6)   | C7EA | S02B | Ag0R | 111.6(6)  |
| Ag08 | Ag0E | Ag04 | 107.18(7)  | C7EA | S02B | Ag10 | 110.0(6)  |
| Ag08 | Ag0E | Ag09 | 58.53(5)   | C7EA | S02B | Ag18 | 116.6(6)  |
| Ag08 | Ag0E | Ag0N | 142.28(8)  | C7EA | S02B | Ag1G | 116.6(5)  |
| Ag08 | Ag0E | Ag0W | 90.21(6)   | Ag15 | S02C | Ag0Y | 70.47(19) |
| Ag08 | Ag0E | Ag13 | 96.63(7)   | Ag1L | S02C | Ag0Y | 124.2(2)  |
| Ag09 | Ag0E | Ag0W | 57.17(5)   | Ag1L | S02C | Ag15 | 77.7(2)   |
| Ag0A | Ag0E | Ag01 | 169.75(8)  | C484 | S02C | Ag0Y | 115.4(11) |
| Ag0A | Ag0E | Ag04 | 118.41(7)  | C484 | S02C | Ag15 | 98.7(8)   |
| Ag0A | Ag0E | Ag08 | 119.02(7)  | C484 | S02C | Ag1L | 113.8(10) |
| Ag0A | Ag0E | Ag09 | 111.43(7)  | Ag0I | S02D | Ag1K | 79.4(2)   |
| Ag0A | Ag0E | Ag0N | 58.70(5)   | Ag0T | S02D | Ag0I | 72.00(17) |
| Ag0A | Ag0E | Ag0T | 61.62(6)   | Ag0T | S02D | Ag1K | 120.4(3)  |
| Ag0A | Ag0E | Ag0U | 58.93(6)   | Ag1M | S02D | Ag0I | 132.8(3)  |
| Ag0A | Ag0E | Ag0W | 54.28(6)   | Ag1M | S02D | Ag0T | 79.9(2)   |
| Ag0A | Ag0E | Ag13 | 65.91(6)   | Ag1M | S02D | Ag1K | 83.33(19) |
| Ag0N | Ag0E | Ag09 | 86.21(6)   | C0CA | S02D | Ag0I | 113.6(11) |
| Ag0N | Ag0E | Ag0W | 56.78(5)   | C0CA | S02D | Ag0T | 98.5(9)   |
| Ag0T | Ag0E | Ag04 | 91.10(7)   | C0CA | S02D | Ag1K | 141.0(10) |
| Ag0T | Ag0E | Ag08 | 155.78(8)  | C0CA | S02D | Ag1M | 107.4(13) |
| Ag0T | Ag0E | Ag09 | 145.62(7)  | Ag1H | S02E | Ag14 | 125.6(3)  |
| Ag0T | Ag0E | Ag0N | 60.95(6)   | Ag1T | S02E | Ag14 | 75.8(2)   |
| Ag0T | Ag0E | Ag0U | 113.68(7)  | Ag1T | S02E | Ag1H | 123.5(3)  |
| Ag0T | Ag0E | Ag0W | 106.05(6)  | C2NA | S02E | Ag14 | 107.1(15) |

|                |            |                |           |
|----------------|------------|----------------|-----------|
| Ag0T Ag0E Ag13 | 60.57(6)   | C2NA S02E Ag1H | 108.3(9)  |
| Ag0U Ag0E Ag04 | 142.26(8)  | C2NA S02E Ag1T | 112.8(12) |
| Ag0U Ag0E Ag08 | 60.16(5)   | Ag15 S02F Ag0Z | 99.3(2)   |
| Ag0U Ag0E Ag09 | 83.77(7)   | Ag15 S02F Ag1E | 106.2(2)  |
| Ag0U Ag0E Ag0N | 106.69(6)  | Ag1E S02F Ag0Z | 67.44(17) |
| Ag0U Ag0E Ag0W | 57.38(5)   | C4 S02F Ag0Z   | 117.5(7)  |
| Ag0U Ag0E Ag13 | 70.45(7)   | C4 S02F Ag15   | 124.8(8)  |
| Ag13 Ag0E Ag04 | 146.45(8)  | C4 S02F Ag1E   | 124.8(8)  |
| Ag13 Ag0E Ag09 | 151.36(8)  | Ag0Z S02G Ag1A | 68.41(16) |
| Ag13 Ag0E Ag0N | 112.54(7)  | Ag1L S02G Ag0Z | 99.4(3)   |
| Ag13 Ag0E Ag0W | 114.16(7)  | Ag1L S02G Ag1A | 141.4(2)  |
| Ag01 Ag0F Ag0Q | 59.68(5)   | Ag1R S02G Ag0Z | 128.7(2)  |
| Ag07 Ag0F Ag01 | 51.47(4)   | Ag1R S02G Ag1A | 73.9(2)   |
| Ag07 Ag0F Ag0C | 94.79(6)   | Ag1R S02G Ag1L | 89.0(2)   |
| Ag07 Ag0F Ag0L | 60.69(6)   | C6 S02G Ag0Z   | 105.5(7)  |
| Ag07 Ag0F Ag0Q | 85.15(6)   | C6 S02G Ag1A   | 105.0(8)  |
| Ag07 Ag0F Ag0X | 60.63(5)   | C6 S02G Ag1L   | 113.6(8)  |
| Ag0C Ag0F Ag01 | 52.92(4)   | C6 S02G Ag1R   | 117.2(8)  |
| Ag0C Ag0F Ag0Q | 87.81(6)   | Ag13 S02H Ag0T | 69.80(19) |
| Ag0C Ag0F Ag0X | 155.37(7)  | Ag13 S02H Ag1I | 103.6(3)  |
| Ag0L Ag0F Ag01 | 104.42(6)  | Ag1I S02H Ag0T | 93.0(2)   |
| Ag0L Ag0F Ag0C | 111.02(7)  | C404 S02H Ag0T | 134.4(6)  |
| Ag0L Ag0F Ag0Q | 141.34(6)  | C404 S02H Ag13 | 116.3(7)  |
| Ag0L Ag0F Ag0X | 57.40(6)   | C404 S02H Ag1I | 125.1(6)  |
| Ag0X Ag0F Ag01 | 106.14(6)  | Ag0Z S02I Ag1A | 76.73(19) |
| Ag0X Ag0F Ag0Q | 91.36(6)   | Ag1U S02I Ag0Z | 134.7(3)  |
| S01Z Ag0F Ag01 | 90.17(14)  | Ag1U S02I Ag1A | 88.7(2)   |
| S01Z Ag0F Ag07 | 89.80(13)  | C402 S02I Ag0Z | 116.7(5)  |
| S01Z Ag0F Ag0C | 57.69(13)  | C402 S02I Ag1A | 110.4(7)  |
| S01Z Ag0F Ag0L | 58.98(13)  | C402 S02I Ag1U | 108.6(5)  |
| S01Z Ag0F Ag0Q | 144.60(14) | Ag12 S02J Ag1E | 77.0(2)   |
| S01Z Ag0F Ag0X | 116.36(14) | Ag1K S02J Ag12 | 136.2(3)  |
| S020 Ag0F Ag01 | 102.62(14) | Ag1K S02J Ag1E | 76.8(2)   |
| S020 Ag0F Ag07 | 100.09(14) | Ag1K S02J Ag1M | 89.6(2)   |
| S020 Ag0F Ag0C | 128.99(15) | Ag1M S02J Ag12 | 89.4(2)   |
| S020 Ag0F Ag0L | 118.85(15) | Ag1M S02J Ag1E | 141.3(3)  |
| S020 Ag0F Ag0Q | 45.95(14)  | C9FA S02J Ag12 | 107.9(7)  |
| S020 Ag0F Ag0X | 62.76(14)  | C9FA S02J Ag1E | 101.1(8)  |
| S020 Ag0F S01Z | 166.96(19) | C9FA S02J Ag1K | 111.1(6)  |
| Ag03 Ag0G Ag04 | 56.70(5)   | C9FA S02J Ag1M | 117.6(8)  |

|      |      |      |           |      |      |      |           |
|------|------|------|-----------|------|------|------|-----------|
| Ag03 | Ag0G | Ag07 | 117.22(7) | Ag1C | S02K | Ag14 | 141.2(3)  |
| Ag03 | Ag0G | Ag0K | 116.24(7) | Ag1C | S02K | Ag1D | 87.5(2)   |
| Ag03 | Ag0G | Ag0O | 57.49(6)  | Ag1C | S02K | Ag1F | 95.1(2)   |
| Ag03 | Ag0G | Ag0P | 56.66(5)  | Ag1D | S02K | Ag14 | 70.23(17) |
| Ag03 | Ag0G | Ag0X | 126.38(7) | Ag1F | S02K | Ag14 | 76.5(2)   |
| Ag03 | Ag0G | Ag0Z | 58.94(6)  | Ag1F | S02K | Ag1D | 128.4(3)  |
| Ag03 | Ag0G | Ag1A | 119.46(7) | C2JA | S02K | Ag14 | 110.3(9)  |
| Ag03 | Ag0G | Ag1R | 124.55(8) | C2JA | S02K | Ag1C | 108.5(9)  |
| Ag04 | Ag0G | Ag0K | 91.76(6)  | C2JA | S02K | Ag1D | 122.3(9)  |
| Ag04 | Ag0G | Ag0O | 62.64(5)  | C2JA | S02K | Ag1F | 105.6(8)  |
| Ag04 | Ag0G | Ag0P | 62.19(6)  | Ag16 | S02L | Ag19 | 70.74(19) |
| Ag04 | Ag0G | Ag0X | 95.85(6)  | Ag1R | S02L | Ag16 | 68.9(2)   |
| Ag04 | Ag0G | Ag0Z | 107.87(7) | Ag1R | S02L | Ag19 | 122.1(3)  |
| Ag04 | Ag0G | Ag1A | 146.24(8) | C2BA | S02L | Ag16 | 95.8(8)   |
| Ag04 | Ag0G | Ag1R | 152.97(9) | C2BA | S02L | Ag19 | 112.7(8)  |
| Ag06 | Ag0G | Ag03 | 172.42(8) | C2BA | S02L | Ag1R | 111.0(9)  |
| Ag06 | Ag0G | Ag04 | 117.56(7) | Ag16 | S02M | Ag19 | 72.1(2)   |
| Ag06 | Ag0G | Ag07 | 57.10(5)  | Ag1C | S02M | Ag16 | 71.6(2)   |
| Ag06 | Ag0G | Ag0K | 57.36(6)  | Ag1C | S02M | Ag19 | 118.8(3)  |
| Ag06 | Ag0G | Ag0O | 116.16(7) | C1EA | S02M | Ag16 | 94.9(7)   |
| Ag06 | Ag0G | Ag0P | 126.69(7) | C1EA | S02M | Ag19 | 118.4(8)  |
| Ag06 | Ag0G | Ag0X | 56.85(6)  | C1EA | S02M | Ag1C | 112.3(7)  |
| Ag06 | Ag0G | Ag0Z | 122.51(7) | Ag12 | S02N | Ag1Q | 125.8(3)  |
| Ag06 | Ag0G | Ag1A | 61.91(6)  | Ag1V | S02N | Ag12 | 78.0(2)   |
| Ag06 | Ag0G | Ag1R | 62.93(7)  | Ag1V | S02N | Ag1Q | 121.2(3)  |
| Ag07 | Ag0G | Ag04 | 60.56(5)  | C7FA | S02N | Ag12 | 116.2(8)  |
| Ag07 | Ag0G | Ag0K | 62.81(5)  | C7FA | S02N | Ag1Q | 101.8(7)  |
| Ag07 | Ag0G | Ag0O | 92.47(6)  | C7FA | S02N | Ag1V | 113.5(6)  |
| Ag07 | Ag0G | Ag0P | 95.96(6)  | Ag16 | S02O | Ag1F | 102.6(2)  |
| Ag07 | Ag0G | Ag0X | 61.09(5)  | Ag1A | S02O | Ag16 | 103.9(2)  |
| Ag07 | Ag0G | Ag0Z | 147.88(8) | Ag1A | S02O | Ag1F | 71.0(2)   |
| Ag07 | Ag0G | Ag1A | 110.68(7) | C7DA | S02O | Ag16 | 124.9(10) |
| Ag07 | Ag0G | Ag1R | 111.82(7) | C7DA | S02O | Ag1A | 117.0(11) |
| Ag0K | Ag0G | Ag0O | 58.82(6)  | C7DA | S02O | Ag1F | 124.0(7)  |
| Ag0K | Ag0G | Ag0P | 153.06(7) | C5GA | P02P | Ag0Y | 110.5(8)  |
| Ag0K | Ag0G | Ag0X | 108.84(7) | C5GA | P02P | C558 | 100.4(10) |
| Ag0K | Ag0G | Ag0Z | 89.42(6)  | C558 | P02P | Ag0Y | 115.8(6)  |
| Ag0K | Ag0G | Ag1A | 58.42(6)  | C822 | P02P | Ag0Y | 116.9(8)  |
| Ag0K | Ag0G | Ag1R | 107.92(9) | C822 | P02P | C5GA | 104.1(12) |
| Ag0O | Ag0G | Ag0P | 109.37(7) | C822 | P02P | C558 | 107.2(11) |

|                |            |                |           |
|----------------|------------|----------------|-----------|
| Ag0O Ag0G Ag0X | 152.71(7)  | Ag1E S02Q Ag12 | 83.3(2)   |
| Ag0O Ag0G Ag0Z | 57.58(5)   | Ag1 S02Q Ag12  | 130.7(3)  |
| Ag0O Ag0G Ag1A | 86.68(7)   | Ag1 S02Q Ag1E  | 112.9(4)  |
| Ag0O Ag0G Ag1R | 143.70(8)  | C4KA S02Q Ag12 | 126.1(13) |
| Ag0P Ag0G Ag0X | 69.93(6)   | C4KA S02Q Ag1E | 113.6(7)  |
| Ag0P Ag0G Ag0Z | 104.44(7)  | C4KA S02Q Ag1  | 90.9(9)   |
| Ag0P Ag0G Ag1R | 95.00(8)   | Ag10 S02R Ag1W | 99.9(3)   |
| Ag0X Ag0G Ag1R | 60.76(6)   | Ag17 S02R Ag10 | 73.43(18) |
| Ag0Z Ag0G Ag0X | 149.70(7)  | Ag17 S02R Ag1W | 102.3(3)  |
| Ag0Z Ag0G Ag1R | 91.08(7)   | C40 S02R Ag10  | 112.9(14) |
| Ag1A Ag0G Ag0P | 148.48(7)  | C40 S02R Ag17  | 128.1(16) |
| Ag1A Ag0G Ag0X | 107.99(8)  | C40 S02R Ag1W  | 125.1(13) |
| Ag1A Ag0G Ag0Z | 60.70(6)   | Ag0Y S02S Ag15 | 68.94(19) |
| Ag1A Ag0G Ag1R | 60.13(8)   | Ag1K S02S Ag0Y | 115.8(3)  |
| Ag01 Ag0H Ag0C | 59.09(5)   | Ag1K S02S Ag15 | 68.5(2)   |
| Ag01 Ag0H Ag0Q | 64.94(5)   | C85 S02S Ag0Y  | 119.9(5)  |
| Ag0C Ag0H Ag0Q | 92.18(6)   | C85 S02S Ag15  | 102.2(6)  |
| S021 Ag0H Ag01 | 87.22(12)  | C85 S02S Ag1K  | 114.3(4)  |
| S021 Ag0H Ag0C | 136.19(13) | Ag18 S02T Ag1B | 72.5(2)   |
| S021 Ag0H Ag0Q | 45.63(12)  | Ag18 S02T Ag1H | 119.5(3)  |
| S023 Ag0H Ag01 | 93.85(14)  | Ag1B S02T Ag1H | 73.9(2)   |
| S023 Ag0H Ag0C | 53.78(15)  | C414 S02T Ag18 | 114.1(7)  |
| S023 Ag0H Ag0Q | 70.30(13)  | C414 S02T Ag1B | 97.3(6)   |
| S023 Ag0H S021 | 107.67(18) | C414 S02T Ag1H | 118.9(9)  |
| S027 Ag0H Ag01 | 100.40(16) | Ag1F S02U Ag14 | 76.7(2)   |
| S027 Ag0H Ag0C | 114.57(18) | Ag1U S02U Ag14 | 133.2(3)  |
| S027 Ag0H Ag0Q | 137.86(14) | Ag1U S02U Ag1F | 86.6(2)   |
| S027 Ag0H S021 | 97.27(18)  | Ag2 S02U Ag14  | 80.9(3)   |
| S027 Ag0H S023 | 151.81(19) | Ag2 S02U Ag1F  | 133.2(3)  |
| Ag03 Ag0I Ag0N | 54.38(5)   | Ag2 S02U Ag1U  | 79.6(3)   |
| Ag03 Ag0I Ag0P | 55.33(5)   | C0EA S02U Ag14 | 127.5(5)  |
| Ag03 Ag0I Ag0Q | 102.56(7)  | C0EA S02U Ag1F | 108.0(6)  |
| Ag03 Ag0I Ag0T | 111.17(7)  | C0EA S02U Ag1U | 99.2(4)   |
| Ag04 Ag0I Ag03 | 54.57(5)   | C0EA S02U Ag2  | 118.2(6)  |
| Ag04 Ag0I Ag0N | 56.66(5)   | Ag1J S02V Ag1O | 74.2(2)   |
| Ag04 Ag0I Ag0P | 61.33(6)   | Ag1J S02V Ag1S | 122.7(3)  |
| Ag04 Ag0I Ag0Q | 57.62(5)   | Ag1S S02V Ag1O | 123.0(3)  |
| Ag04 Ag0I Ag0T | 87.43(6)   | C50 S02V Ag1J  | 111.4(5)  |
| Ag0P Ag0I Ag0N | 103.79(7)  | C50 S02V Ag1O  | 119.1(6)  |
| Ag0Q Ag0I Ag0N | 109.43(7)  | C50 S02V Ag1S  | 104.6(5)  |

|                           |                          |
|---------------------------|--------------------------|
| Ag0Q Ag0I Ag0P 62.61(5)   | Ag18 S02W Ag1T 84.9(3)   |
| Ag0T Ag0I Ag0N 56.79(6)   | Ag1G S02W Ag18 80.7(2)   |
| Ag0T Ag0I Ag0P 148.47(8)  | Ag1G S02W Ag1T 131.5(3)  |
| Ag0T Ag0I Ag0Q 98.29(6)   | Ag1O S02W Ag18 134.1(3)  |
| S021 Ag0I Ag03 133.47(13) | Ag1O S02W Ag1G 75.9(2)   |
| S021 Ag0I Ag04 79.41(13)  | Ag1O S02W Ag1T 81.9(3)   |
| S021 Ag0I Ag0N 96.84(12)  | C9OA S02W Ag18 120.2(5)  |
| S021 Ag0I Ag0P 111.05(13) | C9OA S02W Ag1G 117.1(6)  |
| S021 Ag0I Ag0Q 48.48(12)  | C9OA S02W Ag1O 105.7(5)  |
| S021 Ag0I Ag0T 54.50(12)  | C9OA S02W Ag1T 110.3(6)  |
| S022 Ag0I Ag03 87.63(14)  | Ag1M S02X Ag1I 71.4(2)   |
| S022 Ag0I Ag04 114.18(16) | Ag1M S02X Ag1Q 121.1(4)  |
| S022 Ag0I Ag0N 139.97(14) | Ag1Q S02X Ag1I 72.7(2)   |
| S022 Ag0I Ag0P 52.88(15)  | C88 S02X Ag1I 98.7(7)    |
| S022 Ag0I Ag0Q 89.01(13)  | C88 S02X Ag1M 114.6(7)   |
| S022 Ag0I Ag0T 157.53(16) | C88 S02X Ag1Q 115.8(6)   |
| S022 Ag0I S021 120.92(17) | Ag13 S02Y Ag17 75.31(18) |
| S022 Ag0I S02D 110.3(2)   | Ag1N S02Y Ag13 134.1(3)  |
| S02D Ag0I Ag03 106.10(16) | Ag1N S02Y Ag17 82.3(2)   |
| S02D Ag0I Ag04 129.52(16) | Ag1P S02Y Ag13 82.4(2)   |
| S02D Ag0I Ag0N 74.07(16)  | Ag1P S02Y Ag17 134.1(3)  |
| S02D Ag0I Ag0P 151.28(16) | Ag1P S02Y Ag1N 85.5(2)   |
| S02D Ag0I Ag0Q 145.79(16) | C4EA S02Y Ag13 110.9(8)  |
| S02D Ag0I Ag0T 53.94(15)  | C4EA S02Y Ag17 107.8(7)  |
| S02D Ag0I S021 97.57(19)  | C4EA S02Y Ag1N 113.9(8)  |
| Ag02 Ag0J Ag05 58.22(6)   | C4EA S02Y Ag1P 117.6(8)  |
| Ag02 Ag0J Ag07 119.07(7)  | Ag1B S02Z Ag1H 76.2(2)   |
| Ag02 Ag0J Ag0D 60.63(5)   | Ag1D S02Z Ag1B 71.0(2)   |
| Ag02 Ag0J Ag0K 119.50(8)  | Ag1D S02Z Ag1H 124.3(3)  |
| Ag02 Ag0J Ag0L 121.45(6)  | C189 S02Z Ag1B 112.9(18) |
| Ag02 Ag0J Ag0S 57.84(5)   | C189 S02Z Ag1D 105.7(16) |
| Ag02 Ag0J Ag14 60.58(6)   | C189 S02Z Ag1H 128.4(13) |
| Ag02 Ag0J Ag1D 62.11(6)   | C110 P030 Ag19 109.8(9)  |
| Ag02 Ag0J Ag1F 123.07(7)  | C110 P030 C1FA 104.1(10) |
| Ag05 Ag0J Ag0D 59.17(5)   | C1FA P030 Ag19 116.1(7)  |
| Ag05 Ag0J Ag0L 88.39(6)   | C550 P030 Ag19 116.1(6)  |
| Ag05 Ag0J Ag14 113.63(7)  | C550 P030 C110 99.9(11)  |
| Ag05 Ag0J Ag1D 108.54(7)  | C550 P030 C1FA 108.9(9)  |
| Ag05 Ag0J Ag1F 149.50(8)  | Ag1J S031 Ag1P 127.7(5)  |
| Ag06 Ag0J Ag02 175.99(9)  | Ag1N S031 Ag1J 74.6(3)   |

|      |      |      |           |      |      |      |           |
|------|------|------|-----------|------|------|------|-----------|
| Ag06 | Ag0J | Ag05 | 118.11(7) | Ag1N | S031 | Ag1P | 80.1(4)   |
| Ag06 | Ag0J | Ag07 | 57.21(5)  | Ag1V | S031 | Ag1J | 88.4(4)   |
| Ag06 | Ag0J | Ag0D | 119.61(7) | Ag1V | S031 | Ag1N | 129.9(5)  |
| Ag06 | Ag0J | Ag0K | 58.09(6)  | Ag1V | S031 | Ag1P | 74.1(3)   |
| Ag06 | Ag0J | Ag0L | 58.63(5)  | C105 | S031 | Ag1J | 123.9(6)  |
| Ag06 | Ag0J | Ag0S | 119.90(7) | C105 | S031 | Ag1N | 100.5(6)  |
| Ag06 | Ag0J | Ag14 | 121.86(7) | C105 | S031 | Ag1P | 105.1(6)  |
| Ag06 | Ag0J | Ag1D | 121.72(8) | C105 | S031 | Ag1V | 127.2(6)  |
| Ag06 | Ag0J | Ag1F | 58.95(6)  | Ag1I | S032 | Ag1Q | 70.0(2)   |
| Ag07 | Ag0J | Ag05 | 60.91(5)  | Ag1P | S032 | Ag1I | 71.5(2)   |
| Ag07 | Ag0J | Ag0D | 90.90(6)  | Ag1P | S032 | Ag1Q | 121.3(4)  |
| Ag07 | Ag0J | Ag0L | 58.13(5)  | C66  | S032 | Ag1I | 103.3(11) |
| Ag07 | Ag0J | Ag14 | 153.78(8) | C66  | S032 | Ag1P | 113.0(10) |
| Ag07 | Ag0J | Ag1D | 146.51(7) | C66  | S032 | Ag1Q | 117.8(9)  |
| Ag07 | Ag0J | Ag1F | 107.53(7) | C4PA | P034 | Ag1H | 118.1(7)  |
| Ag0D | Ag0J | Ag0L | 60.98(5)  | C6QA | P034 | Ag1H | 108.6(9)  |
| Ag0D | Ag0J | Ag14 | 108.38(7) | C6QA | P034 | C4PA | 103.5(10) |
| Ag0D | Ag0J | Ag1D | 59.42(6)  | C6QA | P034 | C140 | 105.0(8)  |
| Ag0D | Ag0J | Ag1F | 151.12(9) | C140 | P034 | Ag1H | 121.3(7)  |
| Ag0K | Ag0J | Ag05 | 95.18(7)  | C140 | P034 | C4PA | 98.4(7)   |
| Ag0K | Ag0J | Ag07 | 63.10(5)  | Ag1G | S035 | Ag1S | 121.4(4)  |
| Ag0K | Ag0J | Ag0D | 151.12(8) | Ag1G | S035 | Ag1W | 74.0(3)   |
| Ag0K | Ag0J | Ag0L | 109.22(7) | Ag1W | S035 | Ag1S | 75.1(3)   |
| Ag0K | Ag0J | Ag0S | 61.81(6)  | C0TA | S035 | Ag1G | 114.7(9)  |
| Ag0K | Ag0J | Ag14 | 93.47(7)  | C0TA | S035 | Ag1S | 121.3(9)  |
| Ag0K | Ag0J | Ag1D | 148.96(8) | C0TA | S035 | Ag1W | 106.6(6)  |
| Ag0K | Ag0J | Ag1F | 56.31(6)  | Ag1T | S036 | Ag1O | 81.4(4)   |
| Ag0L | Ag0J | Ag1F | 109.90(7) | Ag2  | S036 | Ag1O | 147.2(6)  |
| Ag0S | Ag0J | Ag05 | 67.15(6)  | Ag2  | S036 | Ag1T | 80.9(5)   |
| Ag0S | Ag0J | Ag07 | 96.22(7)  | C97  | S036 | Ag1O | 111.8(7)  |
| Ag0S | Ag0J | Ag0D | 112.71(7) | C97  | S036 | Ag1T | 102.7(6)  |
| Ag0S | Ag0J | Ag0L | 151.79(8) | C97  | S036 | Ag2  | 98.9(7)   |
| Ag0S | Ag0J | Ag14 | 60.37(7)  | C2GA | P038 | Ag1Q | 119.5(6)  |
| Ag0S | Ag0J | Ag1D | 108.90(7) | C2GA | P038 | C71  | 101.2(7)  |
| Ag0S | Ag0J | Ag1F | 87.78(7)  | C89  | P038 | Ag1Q | 114.7(13) |
| Ag14 | Ag0J | Ag0L | 147.10(8) | C89  | P038 | C2GA | 104.7(8)  |
| Ag14 | Ag0J | Ag1D | 59.10(6)  | C89  | P038 | C71  | 109.1(14) |
| Ag14 | Ag0J | Ag1F | 63.10(6)  | C71  | P038 | Ag1Q | 106.5(8)  |
| Ag1D | Ag0J | Ag0L | 91.61(7)  | Ag1N | S03B | Ag1S | 120.2(7)  |
| Ag1D | Ag0J | Ag1F | 95.53(7)  | Ag1N | S03B | Ag1W | 77.1(4)   |



|                |            |                |           |
|----------------|------------|----------------|-----------|
| Ag06 Ag0K Ag07 | 56.20(5)   | Ag1W S03B Ag1S | 74.3(4)   |
| Ag06 Ag0K Ag09 | 116.64(6)  | C5CA S03B Ag1N | 124.0(7)  |
| Ag06 Ag0K Ag0G | 59.86(6)   | C5CA S03B Ag1S | 115.3(7)  |
| Ag06 Ag0K Ag0J | 59.70(6)   | C5CA S03B Ag1W | 112.6(7)  |
| Ag06 Ag0K Ag0O | 121.29(8)  | C4OA P03G Ag1S | 117.5(10) |
| Ag06 Ag0K Ag0S | 119.06(7)  | C4OA P03G C287 | 101.6(8)  |
| Ag06 Ag0K Ag1A | 64.66(6)   | C4OA P03G C5OA | 108.0(8)  |
| Ag06 Ag0K Ag1F | 63.62(7)   | C287 P03G Ag1S | 121.1(9)  |
| Ag06 Ag0K Ag1U | 126.36(10) | C5OA P03G Ag1S | 108.4(9)  |
| Ag07 Ag0K Ag1U | 177.24(10) | C5OA P03G C287 | 98.2(7)   |
| Ag09 Ag0K Ag07 | 60.50(5)   | C13 C9 S024    | 119.5(11) |
| Ag09 Ag0K Ag0S | 59.70(6)   | C13 C9 C19     | 120.0     |
| Ag09 Ag0K Ag1U | 116.98(10) | C19 C9 S024    | 120.4(11) |
| Ag0B Ag0K Ag06 | 173.57(7)  | C43 C13 C9     | 120.0     |
| Ag0B Ag0K Ag07 | 117.67(7)  | C13 C43 C63    | 120.0     |
| Ag0B Ag0K Ag09 | 57.17(5)   | C43 C63 C326   | 120.0     |
| Ag0B Ag0K Ag0G | 119.70(8)  | C43 C63 C95    | 118.8(15) |
| Ag0B Ag0K Ag0J | 116.25(7)  | C326 C63 C95   | 121.2(15) |
| Ag0B Ag0K Ag0O | 58.50(6)   | C19 C326 C63   | 120.0     |
| Ag0B Ag0K Ag0S | 57.21(6)   | C326 C19 C9    | 120.0     |
| Ag0B Ag0K Ag1A | 121.39(7)  | C54 C12 S021   | 121.8(11) |
| Ag0B Ag0K Ag1F | 120.46(8)  | C54 C12 C62    | 120.0     |
| Ag0B Ag0K Ag1U | 59.81(8)   | C62 C12 S021   | 116.9(11) |
| Ag0G Ag0K Ag07 | 58.08(5)   | C14 C54 C12    | 120.0     |
| Ag0G Ag0K Ag09 | 89.61(6)   | C56 C14 C54    | 120.0     |
| Ag0G Ag0K Ag0S | 146.24(7)  | C14 C56 C534   | 120.0     |
| Ag0G Ag0K Ag1A | 63.39(6)   | C14 C56 C74    | 114.2(15) |
| Ag0G Ag0K Ag1U | 121.68(8)  | C534 C56 C74   | 125.8(15) |
| Ag0J Ag0K Ag07 | 58.80(5)   | C62 C534 C56   | 120.0     |
| Ag0J Ag0K Ag09 | 86.27(6)   | C534 C62 C12   | 120.0     |
| Ag0J Ag0K Ag0G | 108.77(7)  | C31 C15 S027   | 121.1(6)  |
| Ag0J Ag0K Ag0O | 144.58(7)  | C31 C15 C98    | 120.0     |
| Ag0J Ag0K Ag0S | 59.36(6)   | C98 C15 S027   | 118.6(6)  |
| Ag0J Ag0K Ag1A | 116.00(8)  | C165 C31 C15   | 120.0     |
| Ag0J Ag0K Ag1F | 67.52(7)   | C31 C165 C8DA  | 120.0     |
| Ag0J Ag0K Ag1U | 122.92(9)  | C165 C8DA C2KA | 112.3(13) |
| Ag0O Ag0K Ag07 | 91.22(6)   | C9DA C8DA C165 | 120.0     |
| Ag0O Ag0K Ag09 | 60.97(6)   | C9DA C8DA C2KA | 127.6(13) |
| Ag0O Ag0K Ag0G | 61.45(6)   | C98 C9DA C8DA  | 120.0     |
| Ag0O Ag0K Ag0S | 108.24(8)  | C9DA C98 C15   | 120.0     |

|                           |                          |
|---------------------------|--------------------------|
| Ag0O Ag0K Ag1A 90.90(7)   | C65 C22 S022 119.5(10)   |
| Ag0O Ag0K Ag1U 86.42(8)   | C65 C22 C247 120.0       |
| Ag0S Ag0K Ag07 92.15(6)   | C247 C22 S022 120.2(10)  |
| Ag0S Ag0K Ag1U 87.25(8)   | C26 C65 C22 120.0        |
| Ag1A Ag0K Ag07 110.88(7)  | C65 C26 C18 120.0        |
| Ag1A Ag0K Ag09 148.78(8)  | C26 C18 C6LA 118.6(13)   |
| Ag1A Ag0K Ag0S 149.94(8)  | C7CA C18 C26 120.0       |
| Ag1A Ag0K Ag1U 70.61(9)   | C7CA C18 C6LA 121.4(13)  |
| Ag1F Ag0K Ag07 112.96(8)  | C18 C7CA C247 120.0      |
| Ag1F Ag0K Ag09 149.69(8)  | C7CA C247 C22 120.0      |
| Ag1F Ag0K Ag0G 112.50(8)  | C8 C32 S01Z 119.0(12)    |
| Ag1F Ag0K Ag0O 147.60(8)  | C8 C32 C1AA 120.0        |
| Ag1F Ag0K Ag0S 92.70(8)   | C1AA C32 S01Z 120.4(12)  |
| Ag1F Ag0K Ag1A 61.10(7)   | C58 C8 C32 120.0         |
| Ag1F Ag0K Ag1U 69.77(9)   | C8 C58 C59 120.0         |
| Ag06 Ag0L Ag07 54.88(5)   | C58 C59 C2AA 120.2(15)   |
| Ag06 Ag0L Ag0D 109.99(7)  | C27 C59 C58 120.0        |
| Ag06 Ag0L Ag0F 104.40(7)  | C27 C59 C2AA 119.8(15)   |
| Ag06 Ag0L Ag0J 54.12(5)   | C59 C27 C1AA 120.0       |
| Ag07 Ag0L Ag0D 86.36(6)   | C27 C1AA C32 120.0       |
| Ag07 Ag0L Ag0F 57.72(5)   | C79 C37 S023 118.5(12)   |
| Ag07 Ag0L Ag0J 55.92(5)   | C79 C37 C8AA 120.0       |
| Ag0D Ag0L Ag0J 55.87(5)   | C8AA C37 S023 121.3(12)  |
| Ag0F Ag0L Ag0D 95.52(6)   | C6AA C79 C37 120.0       |
| Ag0F Ag0L Ag0J 107.66(7)  | C8EA C6AA C79 120.0      |
| Ag0X Ag0L Ag06 57.44(6)   | C6AA C8EA C7AA 120.0     |
| Ag0X Ag0L Ag07 62.01(6)   | C6AA C8EA C8IA 118.5(16) |
| Ag0X Ag0L Ag0D 147.88(8)  | C7AA C8EA C8IA 121.5(16) |
| Ag0X Ag0L Ag0F 63.90(6)   | C8EA C7AA C8AA 120.0     |
| Ag0X Ag0L Ag0J 104.88(7)  | C7AA C8AA C37 120.0      |
| S01Z Ag0L Ag06 136.38(13) | C427 C85 S02S 119.5(7)   |
| S01Z Ag0L Ag07 82.55(13)  | C427 C85 C456 120.0      |
| S01Z Ag0L Ag0D 52.14(12)  | C456 C85 S02S 120.5(7)   |
| S01Z Ag0L Ag0F 49.82(13)  | C85 C427 C371 120.0      |
| S01Z Ag0L Ag0J 96.27(12)  | C159 C371 C427 120.0     |
| S01Z Ag0L Ag0X 113.70(14) | C371 C159 C234 120.0     |
| S028 Ag0L Ag06 101.96(14) | C371 C159 C5LA 123(2)    |
| S028 Ag0L Ag07 125.32(15) | C234 C159 C5LA 117(2)    |
| S028 Ag0L Ag0D 53.05(14)  | C456 C234 C159 120.0     |
| S028 Ag0L Ag0F 144.67(14) | C234 C456 C85 120.0      |

|      |      |      |            |      |      |      |           |
|------|------|------|------------|------|------|------|-----------|
| S028 | Ag0L | Ag0J | 70.31(14)  | C411 | C88  | S02X | 118.9(7)  |
| S028 | Ag0L | Ag0X | 151.42(14) | C411 | C88  | C327 | 120.0     |
| S028 | Ag0L | S01Z | 94.87(18)  | C327 | C88  | S02X | 121.1(7)  |
| S02A | Ag0L | Ag06 | 89.39(14)  | C88  | C411 | C3HA | 120.0     |
| S02A | Ag0L | Ag07 | 118.08(16) | C2HA | C3HA | C411 | 120.0     |
| S02A | Ag0L | Ag0D | 155.16(16) | C3HA | C2HA | C39  | 120.0     |
| S02A | Ag0L | Ag0F | 94.40(16)  | C3HA | C2HA | C9PA | 118.5(7)  |
| S02A | Ag0L | Ag0J | 140.60(15) | C39  | C2HA | C9PA | 121.2(7)  |
| S02A | Ag0L | Ag0X | 56.08(15)  | C327 | C39  | C2HA | 120.0     |
| S02A | Ag0L | S01Z | 122.56(19) | C39  | C327 | C88  | 120.0     |
| S02A | Ag0L | S028 | 109.0(2)   | C45  | C2BA | S02L | 127.1(17) |
| Ag08 | Ag0M | Ag0U | 63.57(6)   | C45  | C2BA | C4BA | 120.0     |
| Ag08 | Ag0M | Ag0V | 63.20(6)   | C4BA | C2BA | S02L | 111.7(17) |
| Ag08 | Ag0M | Ag10 | 59.53(5)   | C2BA | C45  | C3BA | 120.0     |
| Ag08 | Ag0M | Ag11 | 72.90(6)   | C77  | C3BA | C45  | 120.0     |
| Ag08 | Ag0M | Ag17 | 58.73(6)   | C3BA | C77  | C38  | 120.0     |
| Ag08 | Ag0M | Ag1G | 114.39(7)  | C3BA | C77  | C4HA | 118(2)    |
| Ag08 | Ag0M | Ag1J | 124.89(7)  | C38  | C77  | C4HA | 121(2)    |
| Ag08 | Ag0M | Ag1N | 116.11(9)  | C77  | C38  | C4BA | 120.0     |
| Ag08 | Ag0M | Ag1O | 121.48(9)  | C38  | C4BA | C2BA | 120.0     |
| Ag08 | Ag0M | Ag1W | 132.78(10) | C1CA | C0CA | S02D | 112(3)    |
| Ag0U | Ag0M | Ag10 | 115.17(7)  | C1CA | C0CA | C17  | 120.0     |
| Ag0U | Ag0M | Ag11 | 63.69(7)   | C17  | C0CA | S02D | 127(3)    |
| Ag0U | Ag0M | Ag17 | 67.01(7)   | C0CA | C1CA | C273 | 120.0     |
| Ag0U | Ag0M | Ag1G | 177.75(8)  | C280 | C273 | C1CA | 120.0     |
| Ag0U | Ag0M | Ag1J | 68.25(6)   | C273 | C280 | C6PA | 130(3)    |
| Ag0U | Ag0M | Ag1N | 65.68(7)   | C2CA | C280 | C273 | 120.0     |
| Ag0U | Ag0M | Ag1O | 116.84(8)  | C2CA | C280 | C6PA | 110(3)    |
| Ag0U | Ag0M | Ag1W | 123.75(10) | C280 | C2CA | C17  | 120.0     |
| Ag0V | Ag0M | Ag0U | 112.68(7)  | C2CA | C17  | C0CA | 120.0     |
| Ag0V | Ag0M | Ag10 | 64.94(6)   | C3AA | C5AA | C9CA | 120.0     |
| Ag0V | Ag0M | Ag11 | 63.63(7)   | C5AA | C3AA | S020 | 119.5(6)  |
| Ag0V | Ag0M | Ag17 | 112.94(7)  | C4AA | C3AA | S020 | 119.4(6)  |
| Ag0V | Ag0M | Ag1G | 65.15(7)   | C4AA | C3AA | C5AA | 120.0     |
| Ag0V | Ag0M | Ag1J | 116.96(9)  | C3AA | C4AA | C0DA | 120.0     |
| Ag0V | Ag0M | Ag1N | 178.16(9)  | C24  | C0DA | C4AA | 120.0     |
| Ag0V | Ag0M | Ag1O | 65.14(7)   | C0DA | C24  | C4MA | 119.2(7)  |
| Ag0V | Ag0M | Ag1W | 122.14(9)  | C9CA | C24  | C0DA | 120.0     |
| Ag10 | Ag0M | Ag17 | 58.61(6)   | C9CA | C24  | C4MA | 120.6(7)  |
| Ag10 | Ag0M | Ag1G | 63.61(6)   | C24  | C9CA | C5AA | 120.0     |

|                           |                          |
|---------------------------|--------------------------|
| Ag10 Ag0M Ag1N 116.36(8)  | C6DA C7DA S02O 120(2)    |
| Ag11 Ag0M Ag10 121.10(7)  | C6DA C7DA C102 120.0     |
| Ag11 Ag0M Ag17 121.94(8)  | C102 C7DA S02O 120(2)    |
| Ag11 Ag0M Ag1G 115.08(9)  | C68 C6DA C7DA 120.0      |
| Ag11 Ag0M Ag1J 62.69(7)   | C6DA C68 C91 120.0       |
| Ag11 Ag0M Ag1N 114.59(8)  | C68 C91 C178 121.7(18)   |
| Ag11 Ag0M Ag1O 60.78(8)   | C5DA C91 C68 120.0       |
| Ag11 Ag0M Ag1W 154.30(10) | C5DA C91 C178 118.3(18)  |
| Ag17 Ag0M Ag1G 113.01(7)  | C102 C5DA C91 120.0      |
| Ag17 Ag0M Ag1N 67.41(7)   | C5DA C102 C7DA 120.0     |
| Ag1J Ag0M Ag10 175.53(8)  | C117 C75 S029 117.6(13)  |
| Ag1J Ag0M Ag17 122.19(9)  | C117 C75 C284 120.0      |
| Ag1J Ag0M Ag1G 113.08(8)  | C284 C75 S029 121.6(12)  |
| Ag1J Ag0M Ag1N 61.84(8)   | C388 C117 C75 120.0      |
| Ag1N Ag0M Ag1G 116.50(8)  | C117 C388 C118 120.0     |
| Ag1O Ag0M Ag10 117.73(9)  | C388 C118 C10A 120.0(8)  |
| Ag1O Ag0M Ag17 176.03(9)  | C186 C118 C388 120.0     |
| Ag1O Ag0M Ag1G 63.10(8)   | C186 C118 C10A 120.0(8)  |
| Ag1O Ag0M Ag1J 61.32(8)   | C118 C186 C284 120.0     |
| Ag1O Ag0M Ag1N 114.63(8)  | C186 C284 C75 120.0      |
| Ag1O Ag0M Ag1W 97.43(11)  | C8BA C4EA S02Y 118.4(16) |
| Ag1W Ag0M Ag10 79.93(8)   | C8BA C4EA C7BA 120.0     |
| Ag1W Ag0M Ag17 80.61(10)  | C7BA C4EA S02Y 121.1(16) |
| Ag1W Ag0M Ag1G 58.23(9)   | C9BA C8BA C4EA 120.0     |
| Ag1W Ag0M Ag1J 95.79(9)   | C8BA C9BA C5EA 120.0     |
| Ag1W Ag0M Ag1N 59.65(8)   | C9BA C5EA C4IA 118(2)    |
| Ag03 Ag0N Ag04 56.84(5)   | C6BA C5EA C9BA 120.0     |
| Ag03 Ag0N Ag0E 116.90(7)  | C6BA C5EA C4IA 122(2)    |
| Ag03 Ag0N Ag0I 59.46(5)   | C5EA C6BA C7BA 120.0     |
| Ag03 Ag0N Ag0O 59.03(6)   | C6BA C7BA C4EA 120.0     |
| Ag03 Ag0N Ag0T 118.80(7)  | C328 C7EA S02B 120.3(7)  |
| Ag03 Ag0N Ag0W 120.00(8)  | C328 C7EA C478 120.0     |
| Ag03 Ag0N Ag12 124.02(7)  | C478 C7EA S02B 119.6(7)  |
| Ag03 Ag0N Ag1E 59.60(6)   | C7EA C328 C232 120.0     |
| Ag04 Ag0N Ag0E 60.08(5)   | C218 C232 C328 120.0     |
| Ag04 Ag0N Ag0I 58.35(5)   | C232 C218 C503 120.0     |
| Ag04 Ag0N Ag0T 90.04(6)   | C232 C218 C84 121.0(16)  |
| Ag04 Ag0N Ag0W 95.72(7)   | C503 C218 C84 119.0(16)  |
| Ag04 Ag0N Ag12 151.41(9)  | C478 C503 C218 120.0     |
| Ag04 Ag0N Ag1E 108.45(7)  | C503 C478 C7EA 120.0     |

|                |           |                |           |
|----------------|-----------|----------------|-----------|
| Ag0A Ag0N Ag03 | 174.72(8) | C464 C404 S02H | 121.8(10) |
| Ag0A Ag0N Ag04 | 118.01(7) | C464 C404 C584 | 120.0     |
| Ag0A Ag0N Ag0E | 58.00(5)  | C584 C404 S02H | 118.2(10) |
| Ag0A Ag0N Ag0I | 119.75(7) | C452 C464 C404 | 120.0     |
| Ag0A Ag0N Ag0O | 118.55(8) | C6CA C452 C464 | 120.0     |
| Ag0A Ag0N Ag0T | 60.60(6)  | C452 C6CA C1BA | 120.0     |
| Ag0A Ag0N Ag0W | 57.73(6)  | C452 C6CA C152 | 119.5(7)  |
| Ag0A Ag0N Ag12 | 59.63(6)  | C1BA C6CA C152 | 119.3(8)  |
| Ag0A Ag0N Ag1E | 123.87(7) | C6CA C1BA C584 | 120.0     |
| Ag0E Ag0N Ag0I | 87.00(6)  | C1BA C584 C404 | 120.0     |
| Ag0E Ag0N Ag0T | 58.83(6)  | C0AA C5BA S025 | 121.0(10) |
| Ag0E Ag0N Ag0W | 66.97(6)  | C0AA C5BA C10  | 120.0     |
| Ag0E Ag0N Ag12 | 111.55(7) | C10 C5BA S025  | 119.0(10) |
| Ag0E Ag0N Ag1E | 150.77(9) | C5BA C0AA C64  | 120.0     |
| Ag0I Ag0N Ag1E | 110.46(7) | C20 C64 C0AA   | 120.0     |
| Ag0O Ag0N Ag04 | 63.68(6)  | C64 C20 C21    | 120.0     |
| Ag0O Ag0N Ag0E | 94.63(7)  | C64 C20 C29    | 123.0(14) |
| Ag0O Ag0N Ag0I | 110.95(7) | C21 C20 C29    | 117.0(14) |
| Ag0O Ag0N Ag0T | 150.54(7) | C10 C21 C20    | 120.0     |
| Ag0O Ag0N Ag0W | 60.98(6)  | C21 C10 C5BA   | 120.0     |
| Ag0O Ag0N Ag12 | 91.62(7)  | C8CA C129 S02A | 119.5(6)  |
| Ag0O Ag0N Ag1E | 57.73(6)  | C8CA C129 C293 | 120.0     |
| Ag0T Ag0N Ag0I | 59.34(6)  | C293 C129 S02A | 120.1(6)  |
| Ag0T Ag0N Ag12 | 109.19(8) | C129 C8CA C3DA | 120.0     |
| Ag0T Ag0N Ag1E | 150.27(8) | C417 C3DA C8CA | 120.0     |
| Ag0W Ag0N Ag0I | 150.84(7) | C3DA C417 C82  | 120.0     |
| Ag0W Ag0N Ag0T | 112.44(7) | C3DA C417 C    | 120.0(7)  |
| Ag0W Ag0N Ag12 | 57.85(6)  | C82 C417 C     | 120.0(7)  |
| Ag0W Ag0N Ag1E | 89.26(7)  | C293 C82 C417  | 120.0     |
| Ag12 Ag0N Ag0I | 149.92(8) | C82 C293 C129  | 120.0     |
| Ag12 Ag0N Ag1E | 64.43(6)  | C25 C4DA S028  | 119.6(17) |
| Ag03 Ag0O Ag04 | 55.34(5)  | C25 C4DA C3EA  | 120.0     |
| Ag03 Ag0O Ag09 | 114.90(6) | C3EA C4DA S028 | 120.4(17) |
| Ag03 Ag0O Ag0G | 58.94(6)  | C61 C25 C4DA   | 120.0     |
| Ag03 Ag0O Ag0K | 118.61(7) | C25 C61 C9EA   | 120.0     |
| Ag03 Ag0O Ag0N | 59.43(6)  | C61 C9EA C323  | 120.0     |
| Ag03 Ag0O Ag0W | 120.17(8) | C61 C9EA C0KA  | 119(2)    |
| Ag03 Ag0O Ag0Z | 61.44(6)  | C323 C9EA C0KA | 121(2)    |
| Ag03 Ag0O Ag1E | 63.00(6)  | C3EA C323 C9EA | 120.0     |
| Ag09 Ag0O Ag04 | 59.58(5)  | C323 C3EA C4DA | 120.0     |

|                          |                          |
|--------------------------|--------------------------|
| Ag09 Ag0O Ag0G 88.41(6)  | C6EA C110 P030 122.9(19) |
| Ag0B Ag0O Ag03 171.84(7) | C6EA C110 C166 120.0     |
| Ag0B Ag0O Ag04 116.49(6) | C166 C110 P030 117.0(19) |
| Ag0B Ag0O Ag09 56.95(5)  | C23 C6EA C110 120.0      |
| Ag0B Ag0O Ag0G 117.80(8) | C6EA C23 C0FA 120.0      |
| Ag0B Ag0O Ag0K 58.30(6)  | C23 C0FA C35 124(2)      |
| Ag0B Ag0O Ag0N 117.81(8) | C23 C0FA C329 120.0      |
| Ag0B Ag0O Ag0W 57.57(6)  | C329 C0FA C35 116(2)     |
| Ag0B Ag0O Ag0Z 124.92(8) | C166 C329 C0FA 120.0     |
| Ag0B Ag0O Ag1E 123.97(7) | C329 C166 C110 120.0     |
| Ag0G Ag0O Ag04 57.50(5)  | C2FA C1FA P030 120.3(7)  |
| Ag0K Ag0O Ag04 89.24(6)  | C2FA C1FA C145 120.0     |
| Ag0K Ag0O Ag09 60.52(6)  | C145 C1FA P030 118.9(7)  |
| Ag0K Ag0O Ag0G 59.74(6)  | C1FA C2FA C444 120.0     |
| Ag0K Ag0O Ag0W 108.40(7) | C583 C444 C2FA 120.0     |
| Ag0K Ag0O Ag0Z 93.27(7)  | C444 C583 C305 120.0     |
| Ag0K Ag0O Ag1E 148.68(9) | C444 C583 C263 120.2(8)  |
| Ag0N Ag0O Ag04 58.88(5)  | C305 C583 C263 119.8(8)  |
| Ag0N Ag0O Ag09 86.51(6)  | C145 C305 C583 120.0     |
| Ag0N Ag0O Ag0G 108.10(7) | C305 C145 C1FA 120.0     |
| Ag0N Ag0O Ag0K 143.61(7) | C252 C550 P030 119.1(7)  |
| Ag0N Ag0O Ag0W 60.75(6)  | C252 C550 C574 120.0     |
| Ag0N Ag0O Ag0Z 112.06(8) | C574 C550 P030 120.9(7)  |
| Ag0N Ag0O Ag1E 66.63(7)  | C550 C252 C332 120.0     |
| Ag0W Ag0O Ag04 92.71(6)  | C4FA C332 C252 120.0     |
| Ag0W Ag0O Ag09 60.09(5)  | C332 C4FA C134 120.0     |
| Ag0W Ag0O Ag0G 145.89(7) | C332 C4FA C734 119.3(8)  |
| Ag0Z Ag0O Ag04 108.15(7) | C134 C4FA C734 120.7(8)  |
| Ag0Z Ag0O Ag09 149.28(8) | C4FA C134 C574 120.0     |
| Ag0Z Ag0O Ag0G 63.08(6)  | C134 C574 C550 120.0     |
| Ag0Z Ag0O Ag0W 150.21(8) | C3CA C484 S02C 123(2)    |
| Ag0Z Ag0O Ag1E 58.80(7)  | C3CA C484 C4CA 120.0     |
| Ag1E Ag0O Ag04 111.63(8) | C4CA C484 S02C 117(2)    |
| Ag1E Ag0O Ag09 150.24(9) | C484 C3CA C392 120.0     |
| Ag1E Ag0O Ag0G 111.28(7) | C3CA C392 C168 120.0     |
| Ag1E Ag0O Ag0W 94.17(8)  | C392 C168 C00A 118(2)    |
| Ag03 Ag0P Ag04 54.73(5)  | C640 C168 C392 120.0     |
| Ag03 Ag0P Ag0G 57.45(6)  | C640 C168 C00A 122(2)    |
| Ag03 Ag0P Ag0I 60.37(6)  | C4CA C640 C168 120.0     |
| Ag03 Ag0P Ag0Q 103.03(7) | C640 C4CA C484 120.0     |

|                           |                          |
|---------------------------|--------------------------|
| Ag03 Ag0P Ag1L 77.92(7)   | C6FA C1EA S02M 121.8(13) |
| Ag04 Ag0P Ag0Q 55.09(5)   | C6FA C1EA C2EA 120.0     |
| Ag04 Ag0P Ag1L 123.37(8)  | C2EA C1EA S02M 117.8(13) |
| Ag0G Ag0P Ag04 56.04(5)   | C5FA C6FA C1EA 120.0     |
| Ag0G Ag0P Ag0I 106.21(7)  | C3FA C5FA C6FA 120.0     |
| Ag0G Ag0P Ag0Q 102.67(7)  | C5FA C3FA C536 120.0     |
| Ag0G Ag0P Ag1L 73.75(7)   | C5FA C3FA C226 120.5(7)  |
| Ag0I Ag0P Ag04 57.48(5)   | C536 C3FA C226 119.5(7)  |
| Ag0I Ag0P Ag0Q 58.31(5)   | C2EA C536 C3FA 120.0     |
| Ag0I Ag0P Ag1L 125.51(8)  | C536 C2EA C1EA 120.0     |
| Ag1L Ag0P Ag0Q 175.17(9)  | C616 C414 S02T 120.1(7)  |
| S022 Ag0P Ag03 90.67(13)  | C616 C414 C470 120.0     |
| S022 Ag0P Ag04 109.52(14) | C470 C414 S02T 119.3(7)  |
| S022 Ag0P Ag0G 148.04(13) | C57 C616 C414 120.0      |
| S022 Ag0P Ag0I 52.07(13)  | C9AA C57 C616 120.0      |
| S022 Ag0P Ag0Q 85.64(13)  | C57 C9AA C529 120.0      |
| S022 Ag0P Ag1L 99.12(13)  | C57 C9AA C2LA 120.4(14)  |
| S029 Ag0P Ag03 119.88(15) | C529 C9AA C2LA 119.6(14) |
| S029 Ag0P Ag04 125.33(16) | C470 C529 C9AA 120.0     |
| S029 Ag0P Ag0G 75.78(15)  | C529 C470 C414 120.0     |
| S029 Ag0P Ag0I 177.01(16) | C187 C402 S02I 118.5(7)  |
| S029 Ag0P Ag0Q 123.71(14) | C187 C402 C0BA 120.0     |
| S029 Ag0P Ag1L 52.62(14)  | C0BA C402 S02I 119.6(7)  |
| S029 Ag0P S022 125.1(2)   | C402 C187 C438 120.0     |
| Ag01 Ag0Q Ag0F 60.01(5)   | C187 C438 C201 120.0     |
| Ag04 Ag0Q Ag01 51.58(4)   | C438 C201 C200 120.0     |
| Ag04 Ag0Q Ag0F 86.34(6)   | C438 C201 C1HA 117.5(18) |
| Ag04 Ag0Q Ag0H 95.19(6)   | C200 C201 C1HA 122.5(18) |
| Ag04 Ag0Q Ag0I 59.62(5)   | C201 C200 C0BA 120.0     |
| Ag04 Ag0Q Ag0P 60.65(5)   | C200 C0BA C402 120.0     |
| Ag0H Ag0Q Ag01 52.08(5)   | C319 C7FA S02N 119.6(7)  |
| Ag0H Ag0Q Ag0F 85.03(6)   | C319 C7FA C322 120.0     |
| Ag0I Ag0Q Ag01 102.63(6)  | C322 C7FA S02N 120.4(7)  |
| Ag0I Ag0Q Ag0F 142.68(7)  | C104 C319 C7FA 120.0     |
| Ag0I Ag0Q Ag0H 110.98(6)  | C319 C104 C2DA 120.0     |
| Ag0I Ag0Q Ag0P 59.08(5)   | C104 C2DA C8NA 118.5(7)  |
| Ag0P Ag0Q Ag01 106.17(6)  | C364 C2DA C104 120.0     |
| Ag0P Ag0Q Ag0F 92.30(6)   | C364 C2DA C8NA 121.5(7)  |
| Ag0P Ag0Q Ag0H 155.83(7)  | C2DA C364 C322 120.0     |
| S020 Ag0Q Ag01 102.34(15) | C364 C322 C7FA 120.0     |

|      |      |      |            |      |      |      |           |
|------|------|------|------------|------|------|------|-----------|
| S020 | Ag0Q | Ag04 | 101.17(14) | C160 | C0EA | S02U | 118.8(7)  |
| S020 | Ag0Q | Ag0F | 45.31(14)  | C160 | C0EA | C195 | 120.0     |
| S020 | Ag0Q | Ag0H | 125.45(15) | C195 | C0EA | S02U | 121.2(7)  |
| S020 | Ag0Q | Ag0I | 122.24(14) | C0EA | C160 | C272 | 120.0     |
| S020 | Ag0Q | Ag0P | 64.20(13)  | C410 | C272 | C160 | 120.0     |
| S021 | Ag0Q | Ag01 | 85.15(14)  | C272 | C410 | C389 | 120.0     |
| S021 | Ag0Q | Ag04 | 86.19(13)  | C272 | C410 | C0NA | 119.0(8)  |
| S021 | Ag0Q | Ag0F | 140.09(15) | C389 | C410 | C0NA | 120.2(8)  |
| S021 | Ag0Q | Ag0H | 56.75(13)  | C410 | C389 | C195 | 120.0     |
| S021 | Ag0Q | Ag0I | 58.37(13)  | C389 | C195 | C0EA | 120.0     |
| S021 | Ag0Q | Ag0P | 117.41(13) | C8FA | C66  | S032 | 117.8(17) |
| S021 | Ag0Q | S020 | 171.7(2)   | C8FA | C66  | C78  | 120.0     |
| Ag02 | Ag0R | Ag10 | 107.74(7)  | C78  | C66  | S032 | 121.9(17) |
| Ag05 | Ag0R | Ag02 | 55.44(5)   | C66  | C8FA | C246 | 120.0     |
| Ag05 | Ag0R | Ag0D | 59.60(5)   | C8FA | C246 | C244 | 120.0     |
| Ag05 | Ag0R | Ag10 | 82.63(6)   | C246 | C244 | C895 | 120.4(8)  |
| Ag0D | Ag0R | Ag02 | 58.45(5)   | C94  | C244 | C246 | 120.0     |
| Ag0D | Ag0R | Ag10 | 141.44(8)  | C94  | C244 | C895 | 119.6(8)  |
| S024 | Ag0R | Ag02 | 135.59(13) | C244 | C94  | C78  | 120.0     |
| S024 | Ag0R | Ag05 | 81.34(13)  | C94  | C78  | C66  | 120.0     |
| S024 | Ag0R | Ag0D | 110.63(14) | C222 | C189 | S02Z | 122(4)    |
| S024 | Ag0R | Ag10 | 51.20(13)  | C222 | C189 | C409 | 120.0     |
| S024 | Ag0R | S02B | 96.0(2)    | C409 | C189 | S02Z | 118(4)    |
| S025 | Ag0R | Ag02 | 79.30(14)  | C189 | C222 | C701 | 120.0     |
| S025 | Ag0R | Ag05 | 114.83(14) | C317 | C701 | C222 | 120.0     |
| S025 | Ag0R | Ag0D | 57.10(14)  | C701 | C317 | C233 | 120.0     |
| S025 | Ag0R | Ag10 | 161.30(15) | C701 | C317 | C736 | 115(4)    |
| S025 | Ag0R | S024 | 134.51(19) | C233 | C317 | C736 | 125(4)    |
| S025 | Ag0R | S02B | 108.8(2)   | C317 | C233 | C409 | 120.0     |
| S02B | Ag0R | Ag02 | 97.28(14)  | C233 | C409 | C189 | 120.0     |
| S02B | Ag0R | Ag05 | 120.04(14) | C107 | C9FA | S02J | 118.9(7)  |
| S02B | Ag0R | Ag0D | 152.30(16) | C107 | C9FA | C0GA | 120.0     |
| S02B | Ag0R | Ag10 | 53.78(16)  | C0GA | C9FA | S02J | 120.3(7)  |
| Ag02 | Ag0S | Ag05 | 54.97(5)   | C1GA | C107 | C9FA | 120.0     |
| Ag02 | Ag0S | Ag09 | 112.19(7)  | C107 | C1GA | C72  | 120.0     |
| Ag02 | Ag0S | Ag0J | 59.63(6)   | C1GA | C72  | C269 | 119.5(7)  |
| Ag02 | Ag0S | Ag0K | 118.31(7)  | C352 | C72  | C1GA | 120.0     |
| Ag02 | Ag0S | Ag0V | 58.65(6)   | C352 | C72  | C269 | 120.5(7)  |
| Ag02 | Ag0S | Ag11 | 118.40(7)  | C72  | C352 | C0GA | 120.0     |
| Ag02 | Ag0S | Ag14 | 61.58(6)   | C352 | C0GA | C9FA | 120.0     |



|                |            |                |           |
|----------------|------------|----------------|-----------|
| Ag02 Ag0S Ag1T | 62.71(7)   | C34 C2GA P038  | 120.6(7)  |
| Ag02 Ag0S Ag2  | 119.91(13) | C34 C2GA C262  | 120.0     |
| Ag09 Ag0S Ag05 | 57.28(5)   | C262 C2GA P038 | 119.4(7)  |
| Ag09 Ag0S Ag0K | 59.88(6)   | C2GA C34 C108  | 120.0     |
| Ag09 Ag0S Ag11 | 60.83(6)   | C510 C108 C34  | 120.0     |
| Ag09 Ag0S Ag14 | 146.08(8)  | C108 C510 C617 | 120.0     |
| Ag09 Ag0S Ag1T | 148.64(10) | C108 C510 C492 | 120.3(8)  |
| Ag0B Ag0S Ag02 | 169.51(9)  | C617 C510 C492 | 119.7(8)  |
| Ag0B Ag0S Ag05 | 114.54(7)  | C510 C617 C262 | 120.0     |
| Ag0B Ag0S Ag09 | 57.33(5)   | C617 C262 C2GA | 120.0     |
| Ag0B Ag0S Ag0J | 116.02(8)  | C827 C89 P038  | 124(2)    |
| Ag0B Ag0S Ag0K | 57.52(6)   | C827 C89 C480  | 120.0     |
| Ag0B Ag0S Ag0V | 117.02(9)  | C480 C89 P038  | 116(2)    |
| Ag0B Ag0S Ag11 | 58.63(6)   | C826 C827 C89  | 120.0     |
| Ag0B Ag0S Ag14 | 126.22(8)  | C827 C826 C154 | 120.0     |
| Ag0B Ag0S Ag1T | 126.09(8)  | C826 C154 C670 | 121.2(8)  |
| Ag0B Ag0S Ag2  | 70.55(11)  | C957 C154 C826 | 120.0     |
| Ag0J Ag0S Ag05 | 56.51(5)   | C957 C154 C670 | 118.7(8)  |
| Ag0J Ag0S Ag09 | 86.09(7)   | C154 C957 C480 | 120.0     |
| Ag0J Ag0S Ag0K | 58.83(6)   | C957 C480 C89  | 120.0     |
| Ag0J Ag0S Ag0V | 105.81(6)  | C501 C71 P038  | 119.5(7)  |
| Ag0J Ag0S Ag11 | 144.30(8)  | C501 C71 C507  | 120.0     |
| Ag0J Ag0S Ag14 | 61.56(6)   | C507 C71 P038  | 120.5(7)  |
| Ag0J Ag0S Ag1T | 112.43(9)  | C71 C501 C291  | 120.0     |
| Ag0K Ag0S Ag05 | 87.42(6)   | C501 C291 C225 | 120.0     |
| Ag0K Ag0S Ag11 | 108.49(8)  | C291 C225 C146 | 119.6(8)  |
| Ag0K Ag0S Ag1T | 151.31(10) | C676 C225 C291 | 120.0     |
| Ag0V Ag0S Ag05 | 56.17(5)   | C676 C225 C146 | 120.3(8)  |
| Ag0V Ag0S Ag09 | 82.48(7)   | C507 C676 C225 | 120.0     |
| Ag0V Ag0S Ag0K | 138.77(8)  | C676 C507 C71  | 120.0     |
| Ag0V Ag0S Ag11 | 59.78(6)   | C42 C4 S02F    | 121.7(15) |
| Ag0V Ag0S Ag14 | 114.36(8)  | C42 C4 C4GA    | 120.0     |
| Ag0V Ag0S Ag1T | 68.49(8)   | C4GA C4 S02F   | 118.0(15) |
| Ag11 Ag0S Ag05 | 91.93(7)   | C157 C42 C4    | 120.0     |
| Ag11 Ag0S Ag1T | 93.20(9)   | C3GA C157 C42  | 120.0     |
| Ag14 Ag0S Ag05 | 106.25(7)  | C157 C3GA C130 | 120.0     |
| Ag14 Ag0S Ag0K | 92.41(7)   | C157 C3GA C5HA | 120.3(19) |
| Ag14 Ag0S Ag11 | 153.01(8)  | C130 C3GA C5HA | 119.6(19) |
| Ag14 Ag0S Ag1T | 61.97(8)   | C4GA C130 C3GA | 120.0     |
| Ag1T Ag0S Ag05 | 110.99(8)  | C130 C4GA C4   | 120.0     |

|      |      |      |            |      |      |      |           |
|------|------|------|------------|------|------|------|-----------|
| Ag2  | Ag0S | Ag05 | 173.42(13) | C237 | C5GA | P02P | 117.3(18) |
| Ag2  | Ag0S | Ag09 | 127.86(12) | C237 | C5GA | C330 | 120.0     |
| Ag2  | Ag0S | Ag0J | 117.94(12) | C330 | C5GA | P02P | 122.6(18) |
| Ag2  | Ag0S | Ag0K | 92.26(11)  | C5GA | C237 | C8GA | 120.0     |
| Ag2  | Ag0S | Ag0V | 126.19(12) | C7GA | C8GA | C237 | 120.0     |
| Ag2  | Ag0S | Ag11 | 94.41(12)  | C8GA | C7GA | C6GA | 120.0     |
| Ag2  | Ag0S | Ag14 | 67.18(12)  | C8GA | C7GA | C289 | 116(2)    |
| Ag2  | Ag0S | Ag1T | 66.90(12)  | C6GA | C7GA | C289 | 124(2)    |
| Ag0A | Ag0T | Ag0I | 120.84(8)  | C330 | C6GA | C7GA | 120.0     |
| Ag0A | Ag0T | Ag0N | 57.17(6)   | C6GA | C330 | C5GA | 120.0     |
| Ag0A | Ag0T | Ag13 | 64.22(6)   | C0HA | C558 | P02P | 120.3(7)  |
| Ag0A | Ag0T | Ag1M | 71.27(7)   | C0HA | C558 | C589 | 120.0     |
| Ag0E | Ag0T | Ag0A | 57.37(5)   | C589 | C558 | P02P | 119.2(7)  |
| Ag0E | Ag0T | Ag0I | 90.29(7)   | C297 | C0HA | C558 | 120.0     |
| Ag0E | Ag0T | Ag0N | 60.22(6)   | C0HA | C297 | C41  | 120.0     |
| Ag0E | Ag0T | Ag13 | 60.13(6)   | C297 | C41  | C9GA | 120.0     |
| Ag0E | Ag0T | Ag1M | 122.27(8)  | C297 | C41  | C8PA | 118(2)    |
| Ag0I | Ag0T | Ag1M | 94.94(7)   | C9GA | C41  | C8PA | 122(2)    |
| Ag0N | Ag0T | Ag0I | 63.86(6)   | C589 | C9GA | C41  | 120.0     |
| Ag0N | Ag0T | Ag1M | 71.16(7)   | C9GA | C589 | C558 | 120.0     |
| Ag13 | Ag0T | Ag0I | 142.58(8)  | C1DA | C822 | P02P | 115.9(14) |
| Ag13 | Ag0T | Ag0N | 111.56(8)  | C1DA | C822 | C353 | 120.0     |
| Ag13 | Ag0T | Ag1M | 119.54(8)  | C353 | C822 | P02P | 124.0(14) |
| S021 | Ag0T | Ag0A | 133.84(14) | C822 | C1DA | C562 | 120.0     |
| S021 | Ag0T | Ag0E | 76.56(13)  | C757 | C562 | C1DA | 120.0     |
| S021 | Ag0T | Ag0I | 56.85(12)  | C562 | C757 | C314 | 121.2(18) |
| S021 | Ag0T | Ag0N | 103.97(13) | C580 | C757 | C314 | 117.8(18) |
| S021 | Ag0T | Ag13 | 91.94(13)  | C580 | C757 | C562 | 120.0     |
| S021 | Ag0T | Ag1M | 148.04(14) | C353 | C580 | C757 | 120.0     |
| S02D | Ag0T | Ag0A | 114.16(15) | C580 | C353 | C822 | 120.0     |
| S02D | Ag0T | Ag0E | 134.93(18) | C495 | C40  | S02R | 135(3)    |
| S02D | Ag0T | Ag0I | 54.06(15)  | C495 | C40  | C0SA | 120.0     |
| S02D | Ag0T | Ag0N | 78.05(17)  | C0SA | C40  | S02R | 105(3)    |
| S02D | Ag0T | Ag13 | 162.84(17) | C8RA | C495 | C40  | 120.0     |
| S02D | Ag0T | Ag1M | 48.50(14)  | C495 | C8RA | C7PA | 120.0     |
| S02D | Ag0T | S021 | 99.60(18)  | C8RA | C7PA | C9RA | 120.0     |
| S02D | Ag0T | S02H | 110.1(2)   | C8RA | C7PA | C7RA | 109(3)    |
| S02H | Ag0T | Ag0A | 81.42(18)  | C9RA | C7PA | C7RA | 129(3)    |
| S02H | Ag0T | Ag0E | 111.60(19) | C0SA | C9RA | C7PA | 120.0     |
| S02H | Ag0T | Ag0I | 155.66(19) | C9RA | C0SA | C40  | 120.0     |

|                |            |      |      |      |           |
|----------------|------------|------|------|------|-----------|
| S02H Ag0T Ag0N | 135.93(17) | C77  | C4HA | C155 | 104(3)    |
| S02H Ag0T Ag13 | 53.01(17)  | C77  | C4HA | C255 | 121(2)    |
| S02H Ag0T Ag1M | 82.54(15)  | C77  | C4HA | C348 | 107(3)    |
| S02H Ag0T S021 | 116.40(19) | C255 | C4HA | C155 | 108.4(9)  |
| Ag08 Ag0U Ag0W | 96.10(7)   | C255 | C4HA | C348 | 108.6(9)  |
| Ag08 Ag0U Ag11 | 68.56(6)   | C348 | C4HA | C155 | 108.2(9)  |
| Ag08 Ag0U Ag13 | 87.78(6)   | C3GA | C5HA | C212 | 111(2)    |
| Ag08 Ag0U Ag17 | 55.25(5)   | C67  | C5HA | C3GA | 114(2)    |
| Ag08 Ag0U Ag1J | 111.14(8)  | C67  | C5HA | C212 | 108.5(9)  |
| Ag08 Ag0U Ag1N | 108.52(7)  | C67  | C5HA | C6HA | 108.2(9)  |
| Ag08 Ag0U Ag1P | 145.58(9)  | C6HA | C5HA | C3GA | 107(2)    |
| Ag0A Ag0U Ag08 | 118.72(7)  | C6HA | C5HA | C212 | 108.0(9)  |
| Ag0A Ag0U Ag0E | 58.58(5)   | C91  | C178 | C167 | 109.6(10) |
| Ag0A Ag0U Ag0W | 57.68(6)   | C91  | C178 | C193 | 110.2(11) |
| Ag0A Ag0U Ag11 | 117.92(8)  | C91  | C178 | C381 | 110.8(11) |
| Ag0A Ag0U Ag13 | 59.83(6)   | C167 | C178 | C193 | 109.3(10) |
| Ag0A Ag0U Ag17 | 119.49(8)  | C167 | C178 | C381 | 108.4(10) |
| Ag0A Ag0U Ag1J | 123.21(7)  | C193 | C178 | C381 | 108.5(9)  |
| Ag0A Ag0U Ag1N | 122.38(9)  | C20  | C29  | C36  | 115.4(18) |
| Ag0A Ag0U Ag1P | 59.89(7)   | C20  | C29  | C46  | 108.3(18) |
| Ag0E Ag0U Ag08 | 60.22(5)   | C20  | C29  | C204 | 109.8(19) |
| Ag0E Ag0U Ag0W | 67.30(6)   | C46  | C29  | C36  | 107.7(8)  |
| Ag0E Ag0U Ag11 | 98.56(7)   | C46  | C29  | C204 | 107.8(9)  |
| Ag0E Ag0U Ag13 | 55.09(6)   | C204 | C29  | C36  | 107.6(9)  |
| Ag0E Ag0U Ag17 | 84.00(6)   | C209 | C6   | S02G | 118.2(17) |
| Ag0E Ag0U Ag1J | 155.87(10) | C209 | C6   | C7HA | 120.0     |
| Ag0E Ag0U Ag1N | 144.35(9)  | C7HA | C6   | S02G | 121.8(17) |
| Ag0E Ag0U Ag1P | 106.24(8)  | C3IA | C209 | C6   | 120.0     |
| Ag0M Ag0U Ag08 | 57.26(5)   | C209 | C3IA | C9HA | 120.0     |
| Ag0M Ag0U Ag0A | 175.26(9)  | C3IA | C9HA | C0IA | 118(2)    |
| Ag0M Ag0U Ag0E | 117.48(7)  | C8HA | C9HA | C3IA | 120.0     |
| Ag0M Ag0U Ag0W | 119.02(9)  | C8HA | C9HA | C0IA | 122(2)    |
| Ag0M Ag0U Ag11 | 58.98(6)   | C7HA | C8HA | C9HA | 120.0     |
| Ag0M Ag0U Ag13 | 120.84(7)  | C8HA | C7HA | C6   | 120.0     |
| Ag0M Ag0U Ag17 | 61.06(6)   | C9HA | C0IA | C1IA | 112(2)    |
| Ag0M Ag0U Ag1J | 59.04(6)   | C9HA | C0IA | C288 | 102(2)    |
| Ag0M Ag0U Ag1N | 62.32(7)   | C9HA | C0IA | C2IA | 116(2)    |
| Ag0M Ag0U Ag1P | 124.79(8)  | C1IA | C0IA | C288 | 108.9(9)  |
| Ag0W Ag0U Ag11 | 60.25(7)   | C1IA | C0IA | C2IA | 108.7(9)  |
| Ag0W Ag0U Ag13 | 109.95(7)  | C288 | C0IA | C2IA | 108.4(9)  |

|                |           |                |           |
|----------------|-----------|----------------|-----------|
| Ag0W Ag0U Ag17 | 147.75(7) | C5EA C4IA C30  | 109(2)    |
| Ag0W Ag0U Ag1J | 92.91(8)  | C5EA C4IA C207 | 106(2)    |
| Ag0W Ag0U Ag1N | 147.07(8) | C5EA C4IA C268 | 113(2)    |
| Ag0W Ag0U Ag1P | 107.65(7) | C30 C4IA C207  | 108.4(9)  |
| Ag11 Ag0U Ag13 | 151.91(7) | C268 C4IA C30  | 110(2)    |
| Ag11 Ag0U Ag17 | 112.89(7) | C268 C4IA C207 | 109.4(9)  |
| Ag11 Ag0U Ag1J | 58.33(7)  | C5IA C95 C63   | 107.2(16) |
| Ag11 Ag0U Ag1N | 108.47(8) | C5IA C95 C150  | 101(2)    |
| Ag11 Ag0U Ag1P | 145.24(8) | C106 C95 C63   | 116.6(19) |
| Ag17 Ag0U Ag13 | 59.79(6)  | C106 C95 C5IA  | 109.2(9)  |
| Ag17 Ag0U Ag1P | 93.88(7)  | C106 C95 C150  | 107.9(9)  |
| Ag1J Ag0U Ag13 | 148.90(9) | C150 C95 C63   | 113.4(16) |
| Ag1J Ag0U Ag17 | 110.22(7) | C59 C2AA C6IA  | 105.8(16) |
| Ag1J Ag0U Ag1P | 92.53(8)  | C59 C2AA C7IA  | 115.9(16) |
| Ag1N Ag0U Ag13 | 92.93(8)  | C59 C2AA C316  | 111.0(16) |
| Ag1N Ag0U Ag17 | 64.47(6)  | C6IA C2AA C7IA | 107.9(9)  |
| Ag1N Ag0U Ag1J | 58.30(7)  | C6IA C2AA C316 | 108.0(9)  |
| Ag1N Ag0U Ag1P | 62.49(7)  | C7IA C2AA C316 | 107.9(9)  |
| Ag1P Ag0U Ag13 | 61.12(6)  | C9IA C8IA C8EA | 111.7(18) |
| Ag02 Ag0V Ag05 | 58.54(6)  | C1JA C8IA C8EA | 112.4(19) |
| Ag02 Ag0V Ag08 | 118.79(7) | C1JA C8IA C9IA | 107.7(9)  |
| Ag02 Ag0V Ag0S | 57.74(6)  | C0JA C8IA C8EA | 109.5(18) |
| Ag02 Ag0V Ag10 | 118.03(7) | C0JA C8IA C9IA | 107.3(9)  |
| Ag02 Ag0V Ag11 | 118.97(8) | C0JA C8IA C1JA | 108.0(9)  |
| Ag02 Ag0V Ag1G | 120.62(8) | C11 C2JA S02K  | 126.0(15) |
| Ag02 Ag0V Ag1O | 121.83(9) | C11 C2JA C215  | 120.0     |
| Ag05 Ag0V Ag0S | 66.79(6)  | C215 C2JA S02K | 114.0(15) |
| Ag05 Ag0V Ag10 | 84.58(6)  | C2JA C11 C3JA  | 120.0     |
| Ag05 Ag0V Ag11 | 99.38(7)  | C4JA C3JA C11  | 120.0     |
| Ag05 Ag0V Ag1G | 142.16(8) | C3JA C4JA C6JA | 119.9(8)  |
| Ag05 Ag0V Ag1O | 155.82(9) | C5JA C4JA C3JA | 120.0     |
| Ag08 Ag0V Ag05 | 60.29(6)  | C5JA C4JA C6JA | 117.6(8)  |
| Ag08 Ag0V Ag0S | 96.09(7)  | C4JA C5JA C215 | 120.0     |
| Ag08 Ag0V Ag10 | 57.02(6)  | C5JA C215 C2JA | 120.0     |
| Ag08 Ag0V Ag11 | 68.95(6)  | C4JA C6JA C179 | 102(2)    |
| Ag08 Ag0V Ag1G | 108.41(8) | C4JA C6JA C7JA | 111.7(19) |
| Ag08 Ag0V Ag1O | 112.59(8) | C4JA C6JA C681 | 117(2)    |
| Ag0M Ag0V Ag02 | 176.18(8) | C179 C6JA C681 | 107.8(9)  |
| Ag0M Ag0V Ag05 | 117.92(8) | C7JA C6JA C179 | 109.0(9)  |
| Ag0M Ag0V Ag08 | 57.63(6)  | C7JA C6JA C681 | 108.8(9)  |

|                |           |      |      |      |           |
|----------------|-----------|------|------|------|-----------|
| Ag0M Ag0V Ag0S | 120.19(8) | C317 | C736 | C8JA | 106(3)    |
| Ag0M Ag0V Ag10 | 61.76(6)  | C317 | C736 | C9JA | 107(3)    |
| Ag0M Ag0V Ag11 | 59.20(6)  | C317 | C736 | C376 | 122(3)    |
| Ag0M Ag0V Ag1G | 62.94(7)  | C8JA | C736 | C9JA | 107.0(9)  |
| Ag0M Ag0V Ag1O | 60.62(7)  | C8JA | C736 | C376 | 107.2(9)  |
| Ag0S Ag0V Ag10 | 148.71(8) | C9JA | C736 | C376 | 106.9(9)  |
| Ag0S Ag0V Ag11 | 61.27(6)  | C9EA | C0KA | C144 | 116(2)    |
| Ag0S Ag0V Ag1G | 149.11(8) | C9EA | C0KA | C1KA | 107.5(18) |
| Ag0S Ag0V Ag1O | 92.55(8)  | C9EA | C0KA | C718 | 106.1(19) |
| Ag10 Ag0V Ag1G | 61.99(6)  | C144 | C0KA | C1KA | 109.1(9)  |
| Ag11 Ag0V Ag10 | 114.50(8) | C144 | C0KA | C718 | 109.1(9)  |
| Ag11 Ag0V Ag1G | 109.97(7) | C718 | C0KA | C1KA | 108.7(9)  |
| Ag11 Ag0V Ag1O | 58.08(7)  | C6CA | C152 | C132 | 106(2)    |
| Ag1O Ag0V Ag10 | 111.64(8) | C176 | C152 | C6CA | 117.1(19) |
| Ag1O Ag0V Ag1G | 61.11(7)  | C176 | C152 | C132 | 108.3(10) |
| Ag09 Ag0W Ag0E | 56.16(5)  | C325 | C152 | C6CA | 108(2)    |
| Ag09 Ag0W Ag11 | 60.99(6)  | C325 | C152 | C132 | 108.0(9)  |
| Ag09 Ag0W Ag1V | 147.05(8) | C325 | C152 | C176 | 108.8(10) |
| Ag0A Ag0W Ag09 | 110.48(7) | C6KA | C4KA | S02Q | 119(2)    |
| Ag0A Ag0W Ag0E | 54.35(5)  | C6KA | C4KA | C5KA | 120.0     |
| Ag0A Ag0W Ag0N | 58.50(6)  | C5KA | C4KA | S02Q | 121(2)    |
| Ag0A Ag0W Ag0O | 116.61(8) | C4KA | C6KA | C158 | 120.0     |
| Ag0A Ag0W Ag0U | 58.10(6)  | C7KA | C158 | C6KA | 120.0     |
| Ag0A Ag0W Ag11 | 118.08(8) | C158 | C7KA | C415 | 120.1(8)  |
| Ag0A Ag0W Ag12 | 62.00(7)  | C181 | C7KA | C158 | 120.0     |
| Ag0A Ag0W Ag1V | 59.56(7)  | C181 | C7KA | C415 | 119.9(8)  |
| Ag0A Ag0W S1   | 101.4(3)  | C5KA | C181 | C7KA | 120.0     |
| Ag0B Ag0W Ag09 | 57.08(5)  | C181 | C5KA | C4KA | 120.0     |
| Ag0B Ag0W Ag0A | 167.50(7) | C7KA | C415 | C8KA | 113(2)    |
| Ag0B Ag0W Ag0E | 113.17(7) | C7KA | C415 | C275 | 108.2(19) |
| Ag0B Ag0W Ag0N | 115.61(8) | C7KA | C415 | C385 | 108(2)    |
| Ag0B Ag0W Ag0O | 57.83(6)  | C8KA | C415 | C275 | 109.1(9)  |
| Ag0B Ag0W Ag0U | 117.22(8) | C8KA | C415 | C385 | 109.7(9)  |
| Ag0B Ag0W Ag11 | 58.91(6)  | C385 | C415 | C275 | 109.3(9)  |
| Ag0B Ag0W Ag12 | 127.14(8) | C72  | C269 | C9KA | 109.5(10) |
| Ag0B Ag0W Ag1V | 131.08(9) | C72  | C269 | C380 | 110.8(10) |
| Ag0B Ag0W S1   | 87.2(3)   | C72  | C269 | C549 | 111.1(10) |
| Ag0E Ag0W Ag1V | 106.94(8) | C9KA | C269 | C380 | 108.3(9)  |
| Ag0N Ag0W Ag09 | 85.26(6)  | C9KA | C269 | C549 | 108.6(9)  |
| Ag0N Ag0W Ag0E | 56.25(5)  | C549 | C269 | C380 | 108.4(9)  |

|                |           |                |           |
|----------------|-----------|----------------|-----------|
| Ag0N Ag0W Ag0O | 58.27(6)  | C9AA C2LA C0LA | 109.2(10) |
| Ag0N Ag0W Ag0U | 104.43(8) | C9AA C2LA C1LA | 111.0(10) |
| Ag0N Ag0W Ag11 | 143.43(7) | C9AA C2LA C735 | 112.1(11) |
| Ag0N Ag0W Ag1V | 109.44(9) | C1LA C2LA C0LA | 107.9(9)  |
| Ag0O Ag0W Ag09 | 60.24(5)  | C735 C2LA C0LA | 108.4(9)  |
| Ag0O Ag0W Ag0E | 86.87(6)  | C735 C2LA C1LA | 108.1(9)  |
| Ag0O Ag0W Ag0U | 138.13(7) | C214 C226 C3FA | 103(2)    |
| Ag0O Ag0W Ag11 | 109.26(8) | C331 C226 C3FA | 113(2)    |
| Ag0O Ag0W Ag1V | 152.48(8) | C331 C226 C214 | 107.7(9)  |
| Ag0U Ag0W Ag09 | 81.98(6)  | C331 C226 C717 | 108.4(10) |
| Ag0U Ag0W Ag0E | 55.32(5)  | C717 C226 C3FA | 117(2)    |
| Ag0U Ag0W Ag11 | 60.00(6)  | C717 C226 C214 | 107.4(9)  |
| Ag0U Ag0W Ag1V | 66.05(6)  | C159 C5LA C304 | 119(3)    |
| Ag11 Ag0W Ag0E | 91.03(6)  | C159 C5LA C358 | 114(2)    |
| Ag11 Ag0W Ag1V | 94.48(8)  | C159 C5LA C382 | 104.4(18) |
| Ag12 Ag0W Ag09 | 147.39(8) | C358 C5LA C304 | 106.3(9)  |
| Ag12 Ag0W Ag0E | 107.52(8) | C358 C5LA C382 | 106.7(9)  |
| Ag12 Ag0W Ag0N | 63.46(6)  | C382 C5LA C304 | 106.5(9)  |
| Ag12 Ag0W Ag0O | 93.40(7)  | C16 C6LA C18   | 106.7(17) |
| Ag12 Ag0W Ag0U | 113.24(9) | C16 C6LA C7LA  | 108.2(9)  |
| Ag12 Ag0W Ag11 | 151.61(8) | C16 C6LA C8LA  | 107.0(9)  |
| Ag12 Ag0W Ag1V | 60.04(7)  | C7LA C6LA C18  | 113.4(18) |
| S1 Ag0W Ag09   | 119.4(3)  | C7LA C6LA C8LA | 107.5(9)  |
| S1 Ag0W Ag0E   | 128.4(3)  | C8LA C6LA C18  | 113.7(16) |
| S1 Ag0W Ag0N   | 153.8(3)  | C0MA C74 C56   | 109.9(17) |
| S1 Ag0W Ag0O   | 139.7(3)  | C0MA C74 C1MA  | 107.9(9)  |
| S1 Ag0W Ag0U   | 73.1(3)   | C1MA C74 C56   | 110.4(19) |
| S1 Ag0W Ag11   | 58.6(3)   | C9LA C74 C56   | 112.2(19) |
| S1 Ag0W Ag12   | 93.1(3)   | C9LA C74 C0MA  | 109.0(9)  |
| S1 Ag0W Ag1V   | 45.1(3)   | C9LA C74 C1MA  | 107.4(9)  |
| Ag06 Ag0X Ag07 | 55.10(5)  | C3MA C2KA C8DA | 108.0(18) |
| Ag06 Ag0X Ag0F | 103.41(7) | C3KA C2KA C8DA | 113.5(17) |
| Ag06 Ag0X Ag0G | 56.65(6)  | C3KA C2KA C3MA | 107.1(9)  |
| Ag06 Ag0X Ag0L | 61.34(6)  | C3KA C2KA C2MA | 107.8(9)  |
| Ag06 Ag0X Ag1R | 63.26(8)  | C2MA C2KA C8DA | 113.2(17) |
| Ag07 Ag0X Ag0F | 55.32(5)  | C2MA C2KA C3MA | 106.9(9)  |
| Ag07 Ag0X Ag0G | 55.75(5)  | C24 C4MA C53   | 107.4(14) |
| Ag07 Ag0X Ag1R | 108.18(9) | C24 C4MA C211  | 110.0(18) |
| Ag0F Ag0X Ag1R | 163.41(9) | C24 C4MA C282  | 114.3(15) |
| Ag0G Ag0X Ag0F | 103.23(6) | C53 C4MA C282  | 108.2(9)  |

|                           |                          |
|---------------------------|--------------------------|
| Ag0G Ag0X Ag1R 61.68(7)   | C211 C4MA C53 108.7(9)   |
| Ag0L Ag0X Ag07 59.26(5)   | C211 C4MA C282 108.1(9)  |
| Ag0L Ag0X Ag0F 58.71(6)   | C417 C C6MA 106.2(13)    |
| Ag0L Ag0X Ag0G 107.10(7)  | C417 C C7MA 117.6(14)    |
| Ag0L Ag0X Ag1R 116.74(9)  | C417 C C5MA 106.3(13)    |
| S029 Ag0X Ag06 117.53(15) | C6MA C C7MA 109.3(9)     |
| S029 Ag0X Ag07 124.96(16) | C6MA C C5MA 109.3(9)     |
| S029 Ag0X Ag0F 125.91(15) | C5MA C C7MA 108.0(8)     |
| S029 Ag0X Ag0G 75.09(15)  | C218 C84 C9MA 117(2)     |
| S029 Ag0X Ag0L 174.68(16) | C218 C84 C8MA 99.2(19)   |
| S029 Ag0X Ag1R 59.72(15)  | C55 C84 C218 116(2)      |
| S029 Ag0X S02A 121.4(2)   | C55 C84 C9MA 108.1(9)    |
| S02A Ag0X Ag06 90.80(16)  | C55 C84 C8MA 107.9(9)    |
| S02A Ag0X Ag07 113.42(14) | C8MA C84 C9MA 107.9(9)   |
| S02A Ag0X Ag0F 89.74(14)  | C410 C0NA C278 108(2)    |
| S02A Ag0X Ag0G 146.78(16) | C410 C0NA C343 109.1(19) |
| S02A Ag0X Ag0L 54.17(13)  | C278 C0NA C343 107.5(9)  |
| S02A Ag0X Ag1R 99.83(15)  | C1NA C0NA C410 116(2)    |
| S022 Ag0Y Ag15 83.83(14)  | C1NA C0NA C278 107.9(9)  |
| S022 Ag0Y S02C 96.2(2)    | C1NA C0NA C343 108.0(9)  |
| S022 Ag0Y S02S 99.8(2)    | C4NA C2NA S02E 119(3)    |
| S02C Ag0Y Ag15 52.65(15)  | C4NA C2NA C5NA 120.0     |
| P02P Ag0Y Ag15 150.4(2)   | C5NA C2NA S02E 120(3)    |
| P02P Ag0Y S022 123.5(2)   | C2NA C4NA C6NA 120.0     |
| P02P Ag0Y S02C 108.1(3)   | C4NA C6NA C3NA 120.0     |
| P02P Ag0Y S02S 120.5(3)   | C6NA C3NA C173 120(3)    |
| S02S Ag0Y Ag15 57.27(19)  | C122 C3NA C6NA 120.0     |
| S02S Ag0Y S02C 105.0(2)   | C122 C3NA C173 120(3)    |
| Ag03 Ag0Z Ag0G 56.47(5)   | C5NA C122 C3NA 120.0     |
| Ag03 Ag0Z Ag1A 115.85(7)  | C122 C5NA C2NA 120.0     |
| Ag0G Ag0Z Ag1A 59.56(6)   | C3NA C173 C7NA 112.5(11) |
| Ag0O Ag0Z Ag03 57.30(5)   | C3NA C173 C473 111.0(11) |
| Ag0O Ag0Z Ag0G 59.34(5)   | C3NA C173 C559 110.4(11) |
| Ag0O Ag0Z Ag1A 86.99(7)   | C7NA C173 C473 107.0(9)  |
| Ag1E Ag0Z Ag03 62.35(7)   | C559 C173 C7NA 107.7(9)  |
| Ag1E Ag0Z Ag0G 110.01(8)  | C559 C173 C473 108.1(9)  |
| Ag1E Ag0Z Ag0O 61.00(7)   | C2DA C8NA C9NA 111.4(10) |
| Ag1E Ag0Z Ag1A 143.81(9)  | C2DA C8NA C266 108.3(10) |
| S02F Ag0Z Ag03 77.49(15)  | C2DA C8NA C276 109.0(10) |
| S02F Ag0Z Ag0G 129.48(15) | C9NA C8NA C266 110.4(9)  |

|                           |                          |
|---------------------------|--------------------------|
| S02F Ag0Z Ag0O 113.83(19) | C9NA C8NA C276 109.2(9)  |
| S02F Ag0Z Ag1A 159.16(19) | C266 C8NA C276 108.3(9)  |
| S02F Ag0Z Ag1E 55.74(18)  | C168 C0OA C138 108(3)    |
| S02F Ag0Z S02G 104.3(2)   | C168 C0OA C257 113(3)    |
| S02G Ag0Z Ag03 99.61(15)  | C168 C0OA C553 112(3)    |
| S02G Ag0Z Ag0G 68.07(14)  | C168 C0OA C2 107(3)      |
| S02G Ag0Z Ag0O 126.90(15) | C168 C0OA C1 111(3)      |
| S02G Ag0Z Ag1A 59.18(16)  | C257 C0OA C138 108.1(9)  |
| S02G Ag0Z Ag1E 154.16(17) | C257 C0OA C553 109.2(9)  |
| S02I Ag0Z Ag03 139.88(16) | C553 C0OA C138 106.9(9)  |
| S02I Ag0Z Ag0G 101.40(16) | C5 C0OA C168 116(3)      |
| S02I Ag0Z Ag0O 82.83(16)  | C5 C0OA C2 110.4(15)     |
| S02I Ag0Z Ag1A 51.74(18)  | C5 C0OA C1 107.4(14)     |
| S02I Ag0Z Ag1E 104.2(2)   | C2 C0OA C1 105.7(13)     |
| S02I Ag0Z S02F 128.5(2)   | C118 C1OA C3OA 118.0(14) |
| S02I Ag0Z S02G 101.4(2)   | C118 C1OA C99 104.0(14)  |
| Ag08 Ag10 Ag0M 54.71(5)   | C118 C1OA C2OA 110.2(13) |
| Ag08 Ag10 Ag0R 91.03(7)   | C3OA C1OA C99 107.3(8)   |
| Ag08 Ag10 Ag0V 57.10(6)   | C2OA C1OA C3OA 109.2(9)  |
| Ag08 Ag10 Ag17 58.38(6)   | C2OA C1OA C99 107.6(9)   |
| Ag08 Ag10 Ag1G 106.80(8)  | C201 C1HA C33 112(2)     |
| Ag0M Ag10 Ag0R 117.32(8)  | C201 C1HA C205 114(2)    |
| Ag0M Ag10 Ag0V 53.30(6)   | C201 C1HA C219 105.6(19) |
| Ag0M Ag10 Ag1G 59.54(6)   | C33 C1HA C205 108.1(9)   |
| Ag0R Ag10 Ag1G 92.50(8)   | C219 C1HA C33 108.6(9)   |
| Ag0V Ag10 Ag0R 64.06(6)   | C219 C1HA C205 108.1(9)  |
| Ag0V Ag10 Ag1G 59.96(6)   | C671 C50 S02V 119.6(7)   |
| Ag17 Ag10 Ag0M 61.50(7)   | C671 C50 C192 120.0      |
| Ag17 Ag10 Ag0R 144.62(8)  | C192 C50 S02V 120.3(7)   |
| Ag17 Ag10 Ag0V 105.72(8)  | C50 C671 C4LA 120.0      |
| Ag17 Ag10 Ag1G 112.02(8)  | C47 C4LA C671 120.0      |
| S024 Ag10 Ag08 86.34(13)  | C4LA C47 C3LA 120.0      |
| S024 Ag10 Ag0M 140.53(13) | C4LA C47 C7OA 119.7(8)   |
| S024 Ag10 Ag0R 50.09(15)  | C3LA C47 C7OA 120.3(8)   |
| S024 Ag10 Ag0V 102.73(14) | C192 C3LA C47 120.0      |
| S024 Ag10 Ag17 105.95(16) | C3LA C192 C50 120.0      |
| S024 Ag10 Ag1G 141.24(17) | C47 C7OA C3QA 104.7(19)  |
| S024 Ag10 S02B 94.2(2)    | C47 C7OA C229 104(2)     |
| S02B Ag10 Ag08 126.02(15) | C137 C7OA C47 124(2)     |
| S02B Ag10 Ag0M 103.51(14) | C137 C7OA C3QA 107.6(9)  |



|                           |                          |
|---------------------------|--------------------------|
| S02B Ag10 Ag0R 52.71(14)  | C137 C7OA C229 108.4(9)  |
| S02B Ag10 Ag0V 70.37(13)  | C229 C7OA C3QA 106.6(9)  |
| S02B Ag10 Ag17 159.83(15) | C400 C9OA S02W 117.6(7)  |
| S02B Ag10 Ag1G 48.38(13)  | C400 C9OA C8OA 120.0     |
| S02R Ag10 Ag08 109.33(17) | C8OA C9OA S02W 122.4(7)  |
| S02R Ag10 Ag0M 78.74(17)  | C9OA C400 C0PA 120.0     |
| S02R Ag10 Ag0R 159.40(17) | C416 C0PA C400 120.0     |
| S02R Ag10 Ag0V 129.71(18) | C0PA C416 C547 120.0     |
| S02R Ag10 Ag17 53.09(17)  | C0PA C416 C943 119.8(8)  |
| S02R Ag10 Ag1G 84.79(19)  | C547 C416 C943 120.2(8)  |
| S02R Ag10 S024 125.9(2)   | C8OA C547 C416 120.0     |
| S02R Ag10 S02B 113.3(2)   | C547 C8OA C9OA 120.0     |
| Ag09 Ag11 Ag08 53.44(5)   | C1PA C97 S036 119.3(7)   |
| Ag09 Ag11 Ag1J 146.17(10) | C1PA C97 C142 120.0      |
| Ag0B Ag11 Ag08 109.32(6)  | C142 C97 S036 120.6(7)   |
| Ag0B Ag11 Ag09 55.88(5)   | C97 C1PA C538 120.0      |
| Ag0B Ag11 Ag0M 161.36(8)  | C2PA C538 C1PA 120.0     |
| Ag0B Ag11 Ag0S 56.26(6)   | C538 C2PA C542 119.6(7)  |
| Ag0B Ag11 Ag0U 114.89(8)  | C3PA C2PA C538 120.0     |
| Ag0B Ag11 Ag0V 113.91(8)  | C3PA C2PA C542 120.4(7)  |
| Ag0B Ag11 Ag0W 56.75(6)   | C2PA C3PA C142 120.0     |
| Ag0B Ag11 Ag1J 133.86(8)  | C3PA C142 C97 120.0      |
| Ag0B Ag11 Ag1O 131.64(10) | C171 C4PA P034 120.6(7)  |
| Ag0B Ag11 S1 85.8(3)      | C171 C4PA C359 120.0     |
| Ag0M Ag11 Ag08 52.05(5)   | C359 C4PA P034 119.4(7)  |
| Ag0M Ag11 Ag09 105.49(7)  | C199 C171 C4PA 120.0     |
| Ag0M Ag11 Ag0S 115.85(7)  | C171 C199 C235 120.0     |
| Ag0M Ag11 Ag0U 57.33(6)   | C199 C235 C797 120.0     |
| Ag0M Ag11 Ag0V 57.16(6)   | C199 C235 C458 120.6(8)  |
| Ag0M Ag11 Ag0W 116.87(9)  | C797 C235 C458 119.4(8)  |
| Ag0M Ag11 Ag1J 61.33(6)   | C359 C797 C235 120.0     |
| Ag0M Ag11 Ag1O 62.00(8)   | C797 C359 C4PA 120.0     |
| Ag0M Ag11 S1 105.9(3)     | C280 C6PA C112 96(2)     |
| Ag0S Ag11 Ag08 86.43(6)   | C280 C6PA C5PA 125(3)    |
| Ag0S Ag11 Ag09 58.76(6)   | C280 C6PA C230 109(2)    |
| Ag0S Ag11 Ag1J 154.51(10) | C112 C6PA C230 108.5(9)  |
| Ag0U Ag11 Ag08 54.84(5)   | C5PA C6PA C112 108.6(9)  |
| Ag0U Ag11 Ag09 81.05(7)   | C5PA C6PA C230 108.2(9)  |
| Ag0U Ag11 Ag0S 136.83(8)  | C2HA C9PA C1QA 109(2)    |
| Ag0U Ag11 Ag0W 59.75(6)   | C2HA C9PA C228 111.2(19) |

|                |            |                |           |
|----------------|------------|----------------|-----------|
| Ag0U Ag11 Ag1J | 65.54(7)   | C2HA C9PA C0QA | 112.3(15) |
| Ag0V Ag11 Ag08 | 54.46(5)   | C1QA C9PA C0QA | 107.6(9)  |
| Ag0V Ag11 Ag09 | 81.01(6)   | C228 C9PA C1QA | 109.1(9)  |
| Ag0V Ag11 Ag0S | 58.95(6)   | C228 C9PA C0QA | 107.5(9)  |
| Ag0V Ag11 Ag0U | 102.72(7)  | C9QA C6QA P034 | 119.4(7)  |
| Ag0V Ag11 Ag0W | 137.70(8)  | C9QA C6QA C8QA | 120.0     |
| Ag0V Ag11 Ag1J | 110.39(8)  | C8QA C6QA P034 | 120.0(7)  |
| Ag0W Ag11 Ag08 | 87.78(7)   | C6QA C9QA C1RA | 120.0     |
| Ag0W Ag11 Ag09 | 59.37(6)   | C2RA C1RA C9QA | 120.0     |
| Ag0W Ag11 Ag0S | 105.60(7)  | C1RA C2RA C0RA | 120.0     |
| Ag0W Ag11 Ag1J | 97.04(8)   | C1RA C2RA C3RA | 120.0(8)  |
| Ag1J Ag11 Ag08 | 106.31(8)  | C0RA C2RA C3RA | 120.0(8)  |
| Ag1O Ag11 Ag08 | 105.48(7)  | C8QA C0RA C2RA | 120.0     |
| Ag1O Ag11 Ag09 | 143.66(9)  | C0RA C8QA C6QA | 120.0     |
| Ag1O Ag11 Ag0S | 94.38(9)   | C244 C895 C87  | 105(2)    |
| Ag1O Ag11 Ag0U | 112.40(9)  | C244 C895 C93  | 116(2)    |
| Ag1O Ag11 Ag0V | 63.40(6)   | C244 C895 C4RA | 112(2)    |
| Ag1O Ag11 Ag0W | 156.78(9)  | C87 C895 C93   | 107.7(9)  |
| Ag1O Ag11 Ag1J | 61.25(8)   | C4RA C895 C87  | 108.1(9)  |
| S1 Ag11 Ag08   | 127.3(3)   | C4RA C895 C93  | 107.7(9)  |
| S1 Ag11 Ag09   | 117.4(3)   | C7PA C7RA C6RA | 115(3)    |
| S1 Ag11 Ag0S   | 137.6(3)   | C7PA C7RA C170 | 111(3)    |
| S1 Ag11 Ag0U   | 72.8(3)    | C7PA C7RA C5RA | 110(3)    |
| S1 Ag11 Ag0V   | 159.2(3)   | C170 C7RA C6RA | 107.3(9)  |
| S1 Ag11 Ag0W   | 58.3(2)    | C5RA C7RA C6RA | 107.1(9)  |
| S1 Ag11 Ag1J   | 49.0(3)    | C5RA C7RA C170 | 107.3(9)  |
| S1 Ag11 Ag1O   | 98.9(3)    | C825 C4OA P03G | 122.0(7)  |
| Ag0A Ag12 Ag0N | 55.37(5)   | C825 C4OA C685 | 120.0     |
| Ag0A Ag12 Ag1E | 114.57(7)  | C685 C4OA P03G | 118.0(7)  |
| Ag0A Ag12 Ag1V | 60.39(6)   | C4OA C825 C182 | 120.0     |
| Ag0N Ag12 Ag1E | 59.36(6)   | C7SA C182 C825 | 120.0     |
| Ag0N Ag12 Ag1V | 110.54(8)  | C182 C7SA C440 | 120.6(8)  |
| Ag0W Ag12 Ag0A | 56.62(6)   | C386 C7SA C182 | 120.0     |
| Ag0W Ag12 Ag0N | 58.69(6)   | C386 C7SA C440 | 119.4(8)  |
| Ag0W Ag12 Ag1E | 86.79(7)   | C7SA C386 C685 | 120.0     |
| Ag0W Ag12 Ag1V | 66.18(9)   | C386 C685 C4OA | 120.0     |
| Ag1V Ag12 Ag1E | 150.72(11) | C6OA C287 P03G | 118.5(7)  |
| S02J Ag12 Ag0A | 102.54(15) | C6OA C287 C874 | 120.0     |
| S02J Ag12 Ag0N | 67.06(14)  | C874 C287 P03G | 121.4(7)  |
| S02J Ag12 Ag0W | 124.09(16) | C287 C6OA C290 | 120.0     |

|      |      |      |            |      |      |      |           |
|------|------|------|------------|------|------|------|-----------|
| S02J | Ag12 | Ag1E | 52.98(17)  | C162 | C290 | C60A | 120.0     |
| S02J | Ag12 | Ag1V | 153.2(2)   | C290 | C162 | C638 | 120.0     |
| S02N | Ag12 | Ag0A | 88.78(17)  | C290 | C162 | C622 | 118.4(8)  |
| S02N | Ag12 | Ag0N | 141.44(19) | C638 | C162 | C622 | 119.4(8)  |
| S02N | Ag12 | Ag0W | 116.02(18) | C874 | C638 | C162 | 120.0     |
| S02N | Ag12 | Ag1E | 154.49(16) | C638 | C874 | C287 | 120.0     |
| S02N | Ag12 | Ag1V | 49.84(18)  | C686 | C50A | P03G | 118.8(7)  |
| S02N | Ag12 | S02J | 114.2(3)   | C686 | C50A | C5QA | 120.0     |
| S02N | Ag12 | S02Q | 122.0(2)   | C5QA | C50A | P03G | 121.2(7)  |
| S02Q | Ag12 | Ag0A | 135.97(18) | C50A | C686 | C866 | 120.0     |
| S02Q | Ag12 | Ag0N | 95.78(17)  | C686 | C866 | C7QA | 120.0     |
| S02Q | Ag12 | Ag0W | 80.51(18)  | C866 | C7QA | C613 | 120.5(8)  |
| S02Q | Ag12 | Ag1E | 47.14(16)  | C712 | C7QA | C866 | 120.0     |
| S02Q | Ag12 | Ag1V | 113.79(19) | C712 | C7QA | C613 | 119.5(8)  |
| S02Q | Ag12 | S02J | 92.9(2)    | C7QA | C712 | C5QA | 120.0     |
| Ag0A | Ag13 | Ag0U | 51.14(5)   | C712 | C5QA | C50A | 120.0     |
| Ag0A | Ag13 | Ag17 | 109.80(8)  | C260 | C140 | P034 | 122.3(7)  |
| Ag0E | Ag13 | Ag0A | 55.00(5)   | C260 | C140 | C4SA | 120.0     |
| Ag0E | Ag13 | Ag0T | 59.30(6)   | C4SA | C140 | P034 | 117.7(7)  |
| Ag0E | Ag13 | Ag0U | 54.46(6)   | C140 | C260 | C449 | 120.0     |
| Ag0E | Ag13 | Ag17 | 83.04(7)   | C543 | C449 | C260 | 120.0     |
| Ag0T | Ag13 | Ag0A | 57.57(6)   | C449 | C543 | C5SA | 120.0     |
| Ag0T | Ag13 | Ag0U | 100.71(7)  | C449 | C543 | C6SA | 122.1(8)  |
| Ag0T | Ag13 | Ag17 | 141.16(8)  | C5SA | C543 | C6SA | 117.9(8)  |
| Ag17 | Ag13 | Ag0U | 58.77(6)   | C543 | C5SA | C4SA | 120.0     |
| S027 | Ag13 | Ag0A | 136.05(16) | C5SA | C4SA | C140 | 120.0     |
| S027 | Ag13 | Ag0E | 82.03(14)  | C2PA | C542 | C2QA | 110.6(10) |
| S027 | Ag13 | Ag0T | 110.77(14) | C2PA | C542 | C301 | 112.6(10) |
| S027 | Ag13 | Ag0U | 98.47(17)  | C2PA | C542 | C4QA | 109.8(10) |
| S027 | Ag13 | Ag17 | 49.66(16)  | C301 | C542 | C2QA | 107.1(9)  |
| S027 | Ag13 | S02Y | 95.6(2)    | C4QA | C542 | C2QA | 108.6(9)  |
| S02H | Ag13 | Ag0A | 79.66(17)  | C4QA | C542 | C301 | 108.0(9)  |
| S02H | Ag13 | Ag0E | 114.85(17) | C8SA | C105 | S031 | 119.1(7)  |
| S02H | Ag13 | Ag0T | 57.19(16)  | C8SA | C105 | C302 | 120.0     |
| S02H | Ag13 | Ag0U | 127.33(17) | C302 | C105 | S031 | 120.8(7)  |
| S02H | Ag13 | Ag17 | 161.64(17) | C105 | C8SA | C499 | 120.0     |
| S02H | Ag13 | S027 | 133.2(2)   | C8SA | C499 | C208 | 120.0     |
| S02H | Ag13 | S02Y | 111.0(2)   | C499 | C208 | C476 | 126.1(6)  |
| S02Y | Ag13 | Ag0A | 96.70(15)  | C517 | C208 | C499 | 120.0     |
| S02Y | Ag13 | Ag0E | 117.71(19) | C517 | C208 | C476 | 113.2(6)  |

|      |      |      |            |      |      |      |           |
|------|------|------|------------|------|------|------|-----------|
| S02Y | Ag13 | Ag0T | 151.87(16) | C208 | C517 | C302 | 120.0     |
| S02Y | Ag13 | Ag0U | 64.66(17)  | C517 | C302 | C105 | 120.0     |
| S02Y | Ag13 | Ag17 | 53.42(17)  | C208 | C476 | C506 | 110.8(10) |
| Ag02 | Ag14 | Ag0J | 56.61(5)   | C208 | C476 | C920 | 101.4(8)  |
| Ag02 | Ag14 | Ag0S | 55.81(6)   | C425 | C476 | C208 | 113.6(10) |
| Ag02 | Ag14 | Ag1D | 62.47(6)   | C425 | C476 | C506 | 112.9(9)  |
| Ag02 | Ag14 | Ag1F | 117.56(8)  | C425 | C476 | C920 | 110.3(9)  |
| Ag02 | Ag14 | Ag1T | 60.32(7)   | C506 | C476 | C920 | 107.0(8)  |
| Ag02 | Ag14 | Ag2  | 103.88(11) | C416 | C943 | C133 | 104(2)    |
| Ag0J | Ag14 | Ag1D | 63.31(6)   | C416 | C943 | C9SA | 120.9(10) |
| Ag0J | Ag14 | Ag1F | 61.50(6)   | C416 | C943 | C313 | 108(2)    |
| Ag0J | Ag14 | Ag1T | 108.30(9)  | C133 | C943 | C9SA | 108.1(9)  |
| Ag0J | Ag14 | Ag2  | 104.40(11) | C133 | C943 | C313 | 107.5(9)  |
| Ag0S | Ag14 | Ag0J | 58.07(6)   | C9SA | C943 | C313 | 106.9(9)  |
| Ag0S | Ag14 | Ag1D | 110.48(8)  | C153 | C0TA | S035 | 119.9(7)  |
| Ag0S | Ag14 | Ag1F | 85.73(7)   | C153 | C0TA | C430 | 120.0     |
| Ag0S | Ag14 | Ag1T | 60.37(10)  | C430 | C0TA | S035 | 120.0(7)  |
| Ag0S | Ag14 | Ag2  | 54.42(10)  | C0TA | C153 | C216 | 120.0     |
| Ag1D | Ag14 | Ag1F | 97.06(8)   | C217 | C216 | C153 | 120.0     |
| Ag1D | Ag14 | Ag1T | 111.84(9)  | C216 | C217 | C198 | 120.0     |
| Ag1D | Ag14 | Ag2  | 164.88(12) | C216 | C217 | C1TA | 119.6(7)  |
| Ag1T | Ag14 | Ag1F | 141.01(12) | C198 | C217 | C1TA | 120.4(7)  |
| Ag1T | Ag14 | Ag2  | 61.95(12)  | C430 | C198 | C217 | 120.0     |
| Ag2  | Ag14 | Ag1F | 83.34(10)  | C198 | C430 | C0TA | 120.0     |
| S02E | Ag14 | Ag02 | 88.31(16)  | C217 | C1TA | C183 | 108.2(16) |
| S02E | Ag14 | Ag0J | 144.04(16) | C217 | C1TA | C502 | 118.8(16) |
| S02E | Ag14 | Ag0S | 110.94(19) | C217 | C1TA | C833 | 106.1(16) |
| S02E | Ag14 | Ag1D | 95.31(16)  | C183 | C1TA | C502 | 108.8(9)  |
| S02E | Ag14 | Ag1F | 154.13(17) | C183 | C1TA | C833 | 107.6(9)  |
| S02E | Ag14 | Ag1T | 50.57(19)  | C502 | C1TA | C833 | 106.8(8)  |
| S02E | Ag14 | Ag2  | 90.50(18)  | Ag1  | S36  | Ag1U | 68.1(4)   |
| S02E | Ag14 | S02K | 122.9(2)   | C2TA | S36  | Ag1U | 120.1(12) |
| S02E | Ag14 | S02U | 112.9(2)   | C2TA | S36  | Ag1  | 121.7(7)  |
| S02K | Ag14 | Ag02 | 110.30(15) | C2TA | S36  | Ag2B | 137.0(13) |
| S02K | Ag14 | Ag0J | 69.95(15)  | Ag2A | S36  | Ag1U | 65.6(8)   |
| S02K | Ag14 | Ag0S | 124.40(17) | Ag2A | S36  | Ag1  | 97.2(8)   |
| S02K | Ag14 | Ag1D | 54.85(14)  | Ag2A | S36  | C2TA | 140.5(10) |
| S02K | Ag14 | Ag1F | 50.95(16)  | Ag2B | S36  | Ag1U | 102.8(6)  |
| S02K | Ag14 | Ag1T | 166.33(17) | Ag2B | S36  | Ag1  | 71.0(6)   |
| S02K | Ag14 | Ag2  | 131.70(17) | C3TA | C2TA | S36  | 117.1(7)  |

|                           |                          |
|---------------------------|--------------------------|
| S02K Ag14 S02U 90.3(2)    | C3TA C2TA C642 120.0     |
| S02U Ag14 Ag02 136.2(2)   | C642 C2TA S36 122.9(7)   |
| S02U Ag14 Ag0J 99.43(16)  | C2TA C3TA C4TA 120.0     |
| S02U Ag14 Ag0S 80.52(19)  | C3TA C4TA C5TA 120.0     |
| S02U Ag14 Ag1D 144.1(2)   | C4TA C5TA C674 118.6(7)  |
| S02U Ag14 Ag1F 48.48(18)  | C725 C5TA C4TA 120.0     |
| S02U Ag14 Ag1T 103.3(2)   | C725 C5TA C674 121.4(7)  |
| S02U Ag14 Ag2 42.0(2)     | C5TA C725 C642 120.0     |
| Ag03 Ag15 Ag0Y 110.85(7)  | C725 C642 C2TA 120.0     |
| Ag03 Ag15 Ag1L 77.10(7)   | C5TA C674 C8TA 108.4(19) |
| Ag0Y Ag15 Ag1L 94.04(8)   | C5TA C674 C7TA 120.0(12) |
| Ag1K Ag15 Ag03 63.40(7)   | C5TA C674 C6TA 107(2)    |
| Ag1K Ag15 Ag0Y 91.58(9)   | C8TA C674 C7TA 106.6(9)  |
| Ag1K Ag15 Ag1L 139.41(9)  | C6TA C674 C8TA 107.3(9)  |
| S02C Ag15 Ag03 118.24(16) | C6TA C674 C7TA 106.5(9)  |
| S02C Ag15 Ag0Y 56.89(16)  | C2UA C271 C9TA 120.0     |
| S02C Ag15 Ag1K 147.77(18) | C2UA C271 S1 120.3(7)    |
| S02C Ag15 Ag1L 48.61(17)  | C2UA C271 Ag2B 86.0(9)   |
| S02C Ag15 S02S 105.7(2)   | C9TA C271 S1 119.7(7)    |
| S02F Ag15 Ag03 77.43(15)  | C9TA C271 Ag2B 86.2(9)   |
| S02F Ag15 Ag0Y 165.62(19) | S1 C271 Ag2B 99.0(6)     |
| S02F Ag15 Ag1K 81.6(2)    | C271 C2UA Ag2B 61.9(7)   |
| S02F Ag15 Ag1L 99.4(2)    | C1UA C2UA C271 120.0     |
| S02F Ag15 S02C 130.6(3)   | C1UA C2UA Ag2B 98.4(5)   |
| S02F Ag15 S02S 113.1(2)   | C2UA C1UA C3UA 120.0     |
| S02S Ag15 Ag03 108.12(16) | C1UA C3UA C0UA 120.0     |
| S02S Ag15 Ag0Y 53.78(16)  | C1UA C3UA C601 119.3(7)  |
| S02S Ag15 Ag1K 50.26(17)  | C0UA C3UA C601 120.7(7)  |
| S02S Ag15 Ag1L 147.55(17) | C9TA C0UA C3UA 120.0     |
| Ag06 Ag16 Ag19 113.48(8)  | C271 C9TA Ag2B 61.8(7)   |
| Ag1C Ag16 Ag06 73.24(7)   | C0UA C9TA C271 120.0     |
| Ag1C Ag16 Ag19 92.29(8)   | C0UA C9TA Ag2B 98.4(5)   |
| Ag1R Ag16 Ag06 67.03(8)   | Ag0W S1 Ag11 63.1(3)     |
| Ag1R Ag16 Ag19 97.08(10)  | Ag1J S1 Ag0W 116.9(5)    |
| Ag1R Ag16 Ag1C 139.67(10) | Ag1J S1 Ag11 69.7(3)     |
| S02L Ag16 Ag06 111.45(18) | Ag1V S1 Ag0W 78.0(3)     |
| S02L Ag16 Ag19 54.79(17)  | Ag1V S1 Ag11 123.3(5)    |
| S02L Ag16 Ag1C 146.47(18) | Ag1V S1 Ag1J 96.7(5)     |
| S02L Ag16 Ag1R 52.18(19)  | C271 S1 Ag0W 123.1(6)    |
| S02M Ag16 Ag06 118.73(16) | C271 S1 Ag11 122.5(6)    |

|                           |                          |
|---------------------------|--------------------------|
| S02M Ag16 Ag19 54.33(17)  | C271 S1 Ag1J 116.8(6)    |
| S02M Ag16 Ag1C 51.17(16)  | C271 S1 Ag1V 112.8(6)    |
| S02M Ag16 Ag1R 151.3(2)   | C3UA C601 C123 105.7(16) |
| S02M Ag16 S02L 103.8(2)   | C3UA C601 C177 115.2(16) |
| S02O Ag16 Ag06 76.96(17)  | C3UA C601 C4UA 115.9(12) |
| S02O Ag16 Ag19 168.78(17) | C123 C601 C177 106.6(8)  |
| S02O Ag16 Ag1C 94.83(17)  | C123 C601 C4UA 106.4(8)  |
| S02O Ag16 Ag1R 83.04(19)  | C177 C601 C4UA 106.3(8)  |
| S02O Ag16 S02L 118.7(2)   | C1SA C5CA S03B 121.1(7)  |
| S02O Ag16 S02M 125.4(3)   | C1SA C5CA C419 120.0     |
| Ag08 Ag17 Ag0M 54.23(6)   | C419 C5CA S03B 118.9(7)  |
| Ag08 Ag17 Ag0U 56.14(6)   | C5CA C1SA C143 120.0     |
| Ag08 Ag17 Ag10 58.60(6)   | C901 C143 C1SA 120.0     |
| Ag08 Ag17 Ag13 89.34(7)   | C143 C901 C500 120.0     |
| Ag0M Ag17 Ag0U 51.93(6)   | C143 C901 C156 121.5(7)  |
| Ag0M Ag17 Ag13 113.36(8)  | C500 C901 C156 118.5(7)  |
| Ag0U Ag17 Ag13 61.44(6)   | C419 C500 C901 120.0     |
| Ag10 Ag17 Ag0M 59.89(6)   | C500 C419 C5CA 120.0     |
| Ag10 Ag17 Ag0U 103.62(8)  | C901 C156 C652 111.6(14) |
| Ag10 Ag17 Ag13 145.56(8)  | C901 C156 C2SA 107.0(17) |
| S027 Ag17 Ag08 87.08(14)  | C514 C156 C901 115.8(15) |
| S027 Ag17 Ag0M 139.91(15) | C514 C156 C652 107.4(9)  |
| S027 Ag17 Ag0U 100.22(13) | C514 C156 C2SA 107.3(9)  |
| S027 Ag17 Ag10 111.75(16) | C652 C156 C2SA 107.4(9)  |
| S027 Ag17 Ag13 49.00(13)  | Ag0B Ag2A Ag1 55.9(2)    |
| S027 Ag17 S02Y 93.1(2)    | Ag1U Ag2A Ag0B 64.9(2)   |
| S02R Ag17 Ag08 109.90(19) | Ag1U Ag2A Ag1 60.7(3)    |
| S02R Ag17 Ag0M 77.97(19)  | S36 Ag2A Ag0B 106.2(7)   |
| S02R Ag17 Ag0U 127.2(2)   | S36 Ag2A Ag1U 77.8(9)    |
| S02R Ag17 Ag10 53.47(18)  | S36 Ag2A Ag1 50.4(6)     |
| S02R Ag17 Ag13 160.61(19) | Ag1 Ag2B Ag0B 59.71(19)  |
| S02R Ag17 S027 131.6(2)   | S36 Ag2B Ag0B 91.8(5)    |
| S02R Ag17 S02Y 113.4(2)   | S36 Ag2B Ag1 57.8(4)     |
| S02Y Ag17 Ag08 120.37(16) | S36 Ag2B C271 140.7(9)   |
| S02Y Ag17 Ag0M 97.84(17)  | S36 Ag2B C2UA 134.3(6)   |
| S02Y Ag17 Ag0U 65.29(15)  | S36 Ag2B C9TA 110.3(8)   |
| S02Y Ag17 Ag10 154.58(18) | C271 Ag2B Ag0B 111.6(5)  |
| S02Y Ag17 Ag13 51.27(15)  | C271 Ag2B Ag1 106.5(7)   |
| Ag1B Ag18 Ag02 58.19(6)   | C271 Ag2B C2UA 32.1(3)   |
| S02B Ag18 Ag02 96.82(15)  | C271 Ag2B C9TA 32.0(3)   |

S02B Ag18 Ag1B 121.65(16)  
S02B Ag18 S02W 96.1(2)  
S02T Ag18 Ag02 107.1(2)  
S02T Ag18 Ag1B 56.10(19)  
S02T Ag18 S02B 143.4(2)  
S02T Ag18 S02W 109.5(3)

C2UA Ag2B Ag0B 133.8(5)  
C2UA Ag2B Ag1 135.0(8)  
C2UA Ag2B C9TA 54.8(4)  
C9TA Ag2B Ag0B 113.0(6)  
C9TA Ag2B Ag1 80.2(6)
